# Supplementary material
Source: Research Square preprint supplement (doi:10.21203/rs.3.rs-10303762/v1)
Supplement: Supplementary file 1 [file 830982206fd41477c9c884f9.xlsx]

## Sheet: Structural Properties
		Structural Properties
Pressure	a/a0, b/b0		Pressure				Pressure	a/a0, b/b0		Pressure				Pressure	Inter-layer Distance, d	Pressure
GPa			GPa				GPa			GPa				GPa	Å	GPa
	a/a0 for α-SnTe Monolayer	b/b0 for α-SnTe Monolayer		a/a0 for γ-SnTe Monolayer	b/b0 for γ-SnTe Monolayer			a/a0 for α-SnTe Bilayer	b/b0 for α-SnTe Bilayer		a/a0 for γ-SnTe Bilayer	b/b0 for γ-SnTe Bilayer			α-SnTe Bilayer		γ-SnTe Bilayer
0	1	1	0	1	1		0	1	1	0	1	1		0	3.748	0	3.665
5	0.948777	0.932692	5	0.971429	0.965142		0.5	0.992296	0.982729	1	0.993318	0.98218		0.5	3.648	1	3.556
10	0.928135	0.907692	10	0.949451	0.943355		0.8	0.987673	0.965458	2	0.987751	0.962264		0.8	3.531	2	3.525
14	0.915902	0.898077	15	0.92967	0.923747		1	0.984592	0.960276	3	0.983073	0.95283		1	3.497	3	3.508
15	0.912844	0.894231	17	0.926374	0.91939		2	0.970724	0.941278	4	0.979065	0.945073		2	3.33	4	3.5
16	0.912844	0.890385	18	0.924176	0.915033		3	0.956857	0.932642	4.5	0.976615	0.94109		3	3.193	4.5	3.496
20	0.90367	0.880769	18.5	0.923077	0.912854		4	0.947612	0.924007	5	0.97539	0.934801		4	3.093	5	3.482
			19	0.921099	0.911765		5	0.941448	0.918826					5	3.063
			20	0.92044	0.910675

## Sheet: Band Structure
		Band Structure
																																						Band Energy Gap
	α-SnTe Monolayer									α-SnTe Bilayer								γ-SnTe Monolayer									γ-SnTe Bilayer										For Monolayer					For Bilayer
k-points	Energy	K-points	Energy, E	K-points	Energy, E	K-points	Energy, E		k-points	Energy	K-points	Energy, E	K-points	Energy, E	K-points	Energy, E		k-points	Energy	K-points	Energy, E	K-points	Energy, E	K-points	Energy, E		k-points	Energy	K-points	Energy, E	K-points	Energy, E	K-points	Energy, E			Pressure, P	Band Energy Gap, Eg				Pressure, P	Band Energy Gap, Eg
	eV		eV		eV		eV			eV		eV		eV		eV			eV		eV		eV		eV			eV		eV		eV		eV			GPa	eV				GPa	eV
	α-SnTe Monolayer at P=0GPa		α-SnTe Monolayer at P=14 GPa		α-SnTe Monolayer at P=15 GPa		α-SnTe Monolayer at P=16 GPa			α-SnTe Bilayer at P=0GPa		α-SnTe Bilayer at P=0.5 GPa		α-SnTe Bilayer at 0.8 GPa		α-SnTe Bilayer at 1 GPa			γ-SnTe Monolayer at P=0GPa		γ-SnTe Monolayer at P=18 GPa		γ-SnTe Monolayer at P=18.5 GPa		γ-SnTe Monolayer at P=19 GPa			γ-SnTe Bilayer at P=0GPa		γ-SnTe Bilayer at P=3 GPa		γ-SnTe Bilayer at P=4 GPa		γ-SnTe Bilayer at P=5 GPa				α-SnTe Monolayer		γ-SnTe Monolayer			α-SnTe Bilayer		γ-SnTe Bilayer
0	-21.17	0	-13.7492	0	-22.5804	0	-21.9891		0	-21.709	0	-21.8092	0	-12.1578	0	-21.6532		0	-21.4469	0	-14.4801	0	-14.7777	0	-14.4757		0	-21.3502	0	-12.5951	0	-12.7389	0	-12.9961			0	1.296	0	0.907		0	0.299	0	0.5
0.04312	-21.1698	0.0471196	-13.728	0.0709098	-22.5788	0.0546755	-21.988		0.04423	-21.7087	0.0444501	-21.809	0.0445789	-12.1406	0.0637306	-21.652		0.04117	-21.4466	0.040978	-14.4515	0.0435284	-14.7405	0.0388911	-14.4488		0.04211	-21.3501	0.0415193	-12.5713	0.0414449	-12.7145	0.0413101	-12.9711			5	0.765	5	0.896		0.2	0.188	1	0.396
0.08624	-21.1693	0.0942392	-13.6647	0.14182	-22.5744	0.109351	-21.9851		0.08846	-21.7082	0.0889002	-21.8084	0.0891577	-12.0898	0.127461	-21.6488		0.08235	-21.4458	0.081956	-14.3661	0.0870568	-14.6295	0.0777823	-14.3687		0.08423	-21.3496	0.0830387	-12.5004	0.0828899	-12.6417	0.0826203	-12.8967			10	0.205	10	0.755		0.3	0.145	2	0.282
0.12936	-21.1684	0.141359	-13.5609	0.236109	-22.5727	0.164027	-21.9811		0.13269	-21.7073	0.13335	-21.8074	0.133737	-12.007	0.195238	-21.6479		0.12352	-21.4446	0.122934	-14.2254	0.130585	-14.4462	0.116673	-14.2364		0.12634	-21.3488	0.124558	-12.384	0.124335	-12.5222	0.12393	-12.7742			14	0.018	15	0.608		0.5	0.13	3	0.121
0.17972	-21.168	0.188659	-13.5397	0.330399	-22.5683	0.218702	-21.9768		0.18222	-21.707	0.182718	-21.8072	0.183007	-11.9876	0.263015	-21.6457		0.1647	-21.4431	0.163912	-14.0322	0.174114	-14.1938	0.155565	-14.0576		0.16845	-21.3477	0.166077	-12.2314	0.16578	-12.359	0.165241	-12.6068			15	0.005	17	0.546		0.7	0.056	4	0.006
0.23009	-21.1668	0.235958	-13.4765	0.409169	-22.5741	0.273378	-21.9753		0.23176	-21.7063	0.232086	-21.8064	0.232277	-11.9302	0.330792	-21.6433		0.20544	-21.443	0.204886	-14.0053	0.211924	-14.1671	0.198981	-14.0257		0.22124	-21.3475	0.20639	-12.2116	0.20619	-12.3383	0.205814	-12.5849			16	0	18	0.515		0.8	0.005	4.5	0
0.28045	-21.165	0.283258	-13.3733	0.487938	-22.5787	0.328053	-21.9751		0.28129	-21.7051	0.281454	-21.8055	0.281547	-11.8379	0.410782	-21.6481		0.24617	-21.4427	0.245861	-13.925	0.249735	-14.0876	0.242397	-13.9306		0.27403	-21.347	0.246703	-12.1528	0.2466	-12.2768	0.246388	-12.52			20	0	18.5	0.007		1	0	5	0
0.33082	-21.1629	0.330558	-13.2338	0.566708	-22.5804	0.385369	-21.9749		0.33083	-21.7039	0.330822	-21.8045	0.330817	-11.716	0.490773	-21.6518		0.28691	-21.4424	0.286835	-13.7936	0.287546	-13.9567	0.285813	-13.7748		0.32682	-21.3463	0.287015	-12.0573	0.28701	-12.177	0.286962	-12.4143					19	0		2	0
0.3787	-21.1651	0.389612	-13.4513	0.645398	-22.5787	0.442684	-21.9745		0.37852	-21.7055	0.378478	-21.8059	0.378452	-11.8663	0.570763	-21.6532		0.32765	-21.4421	0.32781	-13.6146	0.325357	-13.7787	0.329229	-13.5625		0.37306	-21.3474	0.327328	-11.9322	0.32742	-12.0529	0.327536	-12.278					20	0		3	0
0.42658	-21.1671	0.448667	-13.6147	0.724089	-22.5741	0.5	-21.9737		0.42621	-21.7069	0.426134	-21.8072	0.426087	-11.9903	0.650673	-21.6518		0.37398	-21.443	0.366441	-13.8667	0.363794	-14.072	0.368085	-13.8276		0.4193	-21.3486	0.373636	-12.1517	0.373728	-12.2796	0.373857	-12.5191								4	0
0.47447	-21.1687	0.507721	-13.7153	0.791135	-22.5752	0.554676	-21.9756		0.47391	-21.708	0.47379	-21.8082	0.473722	-12.0823	0.730584	-21.6481		0.42032	-21.4444	0.405072	-14.0818	0.402231	-14.3211	0.406941	-14.0555		0.46554	-21.3495	0.419944	-12.3401	0.420035	-12.475	0.420179	-12.7224								5	0
0.52235	-21.1697	0.566775	-13.7492	0.85818	-22.5744	0.609351	-21.9782		0.5216	-21.7087	0.521446	-21.8089	0.521357	-12.1388	0.801561	-21.6491		0.46666	-21.4457	0.443704	-14.2537	0.440668	-14.5189	0.445797	-14.2371		0.51178	-21.3501	0.466253	-12.4801	0.466343	-12.62	0.4665	-12.8729
0.57023	-21.17	0.619216	-13.7224	0.92909	-22.5788	0.664027	-21.9808		0.56929	-21.709	0.569102	-21.8092	0.568992	-12.1578	0.872539	-21.6488		0.51299	-21.4466	0.482335	-14.3788	0.479105	-14.6621	0.484653	-14.369		0.55802	-21.3502	0.512561	-12.5661	0.51265	-12.7089	0.512822	-12.965
0.62338	-21.1696	0.671656	-13.6429	1	-22.5804	0.718702	-21.9831		0.62223	-21.7086	0.622	-21.8089	0.621866	-12.1344	0.936269	-21.652		0.55933	-21.4469	0.520967	-14.4547	0.517542	-14.7487	0.523509	-14.4489		0.60935	-21.35	0.55887	-12.5951	0.558958	-12.7389	0.559143	-12.9961
0.67654	-21.1684	0.724096	-13.5128	0	--	0.773378	-21.9842		0.67517	-21.7078	0.674899	-21.808	0.674741	-12.065	1	-21.6532		0.61076	-21.4465	0.559598	-14.4801	0.555979	-14.7777	0.562365	-14.4757		0.66068	-21.3493	0.597421	-12.575	0.597509	-12.7181	0.597706	-12.9745
0.72969	-21.1665	0.768944	-13.5668	0	-22.5637	0.828053	-21.9839		0.72811	-21.7064	0.727797	-21.8068	0.727616	-11.9527	0	--		0.6622	-21.4454	0.598191	-14.4547	0.594377	-14.7488	0.601182	-14.449		0.71201	-21.3482	0.635973	-12.5151	0.63606	-12.6562	0.636269	-12.9104
0.77667	-21.1677	0.813793	-13.583	0.0709098	-22.5684	0.885369	-21.9866		0.77451	-21.7071	0.774081	-21.8073	0.773832	-12.0041	0	-21.6465		0.71363	-21.4439	0.636783	-14.379	0.632776	-14.6623	0.64	-14.3692		0.75185	-21.3483	0.674525	-12.4169	0.674611	-12.5546	0.674831	-12.805
0.82366	-21.1684	0.858641	-13.5609	0.14182	-22.5744	0.942684	-21.9884		0.82091	-21.7074	0.820365	-21.8076	0.820048	-12.0226	0.0637306	-21.6458		0.75419	-21.444	0.675376	-14.2542	0.671174	-14.5194	0.678817	-14.2376		0.7917	-21.3481	0.713076	-12.2829	0.713162	-12.4158	0.713394	-12.6608
0.87064	-21.1684	0.905761	-13.6647	0.236109	-22.5726	1	-21.9891		0.86731	-21.7073	0.86665	-21.8074	0.866263	-12.007	0.127461	-21.6487		0.79475	-21.4437	0.713969	-14.0826	0.709573	-14.322	0.717634	-14.0563		0.83155	-21.3477	0.753358	-12.3042	0.753515	-12.4391	0.753849	-12.6872
0.91376	-21.1693	0.95288	-13.728	0.330399	-22.5683	0	--		0.91154	-21.7082	0.9111	-21.8084	0.910842	-12.0898	0.195238	-21.6478		0.8353	-21.4431	0.754675	-14.1199	0.748344	-14.3361	0.759901	-14.1166		0.87366	-21.3488	0.793641	-12.2849	0.793867	-12.42	0.794304	-12.6691
0.95688	-21.1698	1	-13.7492	0.409169	-22.568	0	-21.9754		0.95577	-21.7087	0.95555	-21.809	0.955421	-12.1406	0.263015	-21.6456		0.87648	-21.4446	0.795382	-14.1029	0.787115	-14.2931	0.802168	-14.1158		0.91577	-21.3496	0.833923	-12.2314	0.83422	-12.359	0.834759	-12.6068
1	-21.17	0	--	0.487938	-22.5659	0.0546755	-21.9763		1	-21.709	1	-21.8092	1	-12.1578	0.330792	-21.6433		0.91765	-21.4458	0.836088	-14.0322	0.825886	-14.1938	0.844435	-14.0576		0.95789	-21.3501	0.875442	-12.384	0.875665	-12.5222	0.87607	-12.7742
0	--	0	-13.0481	0.566708	-22.5637	0.109351	-21.9765		0	--	0	--	0	--	0.410782	-21.6434		0.95883	-21.4466	0.877066	-14.2254	0.869415	-14.4462	0.883327	-14.2364		1	-21.3502	0.916961	-12.5004	0.91711	-12.6417	0.91738	-12.8967
0	-21.1647	0.0471196	-13.2438	0.645398	-22.5659	0.164027	-21.9762		0	-21.7089	0	-21.8092	0	-11.8931	0.490773	-21.6449		1	-21.4469	0.918044	-14.3661	0.912943	-14.6295	0.922218	-14.3687		0	--	0.958481	-12.5713	0.958555	-12.7145	0.95869	-12.9711
0.04312	-21.166	0.0942392	-13.4192	0.724089	-22.568	0.218702	-21.9757		0.04423	-21.7087	0.0444501	-21.809	0.0445789	-11.8784	0.570763	-21.6465		0	--	0.959022	-14.4515	0.956472	-14.7405	0.961109	-14.4488		0	-21.3497	1	-12.5951	1	-12.7389	1	-12.9961
0.08624	-21.1673	0.141359	-13.5608	0.791135	-22.5718	0.273378	-21.9731		0.08846	-21.7081	0.0889002	-21.8084	0.0891577	-11.8956	0.650673	-21.6449		0	-21.4443	1	-14.4801	1	-14.7777	1	-14.4757		0.04211	-21.3494	0	--	0	--	0	--
0.12936	-21.1684	0.188659	-13.5396	0.85818	-22.5744	0.328053	-21.9705		0.13269	-21.7073	0.13335	-21.8074	0.133737	-12.007	0.730584	-21.6434		0.04117	-21.4441	0	--	0	--	0	--		0.08423	-21.3485	0	-12.0078	0	-12.1245	0	-12.353
0.17972	-21.168	0.235958	-13.4763	0.92909	-22.5684	0.385369	-21.9716		0.18222	-21.707	0.182718	-21.8072	0.183007	-11.9875	0.801561	-21.6464		0.08235	-21.4435	0	-12.8715	0	-13.2376	0	-12.9717		0.12634	-21.3474	0.0415193	-11.9873	0.0414449	-12.1035	0.0413101	-12.3315
0.23009	-21.1668	0.283258	-13.373	1	-22.5637	0.442684	-21.9727		0.23176	-21.7062	0.232086	-21.8064	0.232277	-11.9301	0.872539	-21.6487		0.12352	-21.4426	0.040978	-13.1945	0.0435284	-13.2072	0.0388911	-13.2537		0.16845	-21.3477	0.0830387	-11.9269	0.0828899	-12.0413	0.0826203	-12.2678
0.28045	-21.165	0.330558	-13.2334	0	--	0.5	-21.9737		0.28129	-21.7051	0.281454	-21.8055	0.281547	-11.8378	0.936269	-21.6458		0.1647	-21.4431	0.081956	-13.5074	0.0870568	-13.5047	0.0777823	-13.555		0.22124	-21.3475	0.124558	-12.0277	0.124335	-12.1557	0.12393	-12.3981
0.33082	-21.1629	0.389612	-13.275	0	-22.5601	0.554676	-21.9725		0.33083	-21.7039	0.330822	-21.8045	0.330817	-11.716	1	-21.6465		0.20544	-21.443	0.122934	-13.7903	0.130585	-13.877	0.116673	-13.8249		0.27403	-21.3469	0.166077	-12.2182	0.16578	-12.3582	0.165241	-12.6064
0.3787	-21.164	0.448667	-13.2555	0.0709098	-22.5598	0.609351	-21.9721		0.37852	-21.7053	0.378478	-21.8058	0.378452	-11.7553	0	--		0.24617	-21.4427	0.163912	-14.0318	0.174114	-14.1935	0.155565	-14.0502		0.32682	-21.3462	0.20639	-12.1985	0.20619	-12.3375	0.205814	-12.5845
0.42658	-21.1648	0.507721	-13.1761	0.14182	-22.5591	0.664027	-21.9755		0.42621	-21.7067	0.426134	-21.8071	0.426087	-11.7645	0	-21.6405		0.28691	-21.4424	0.204886	-14.0049	0.211924	-14.1668	0.198981	-14.0183		0.37306	-21.3464	0.246703	-12.1402	0.2466	-12.276	0.246388	-12.5196
0.47447	-21.1652	0.566775	-13.0481	0.236109	-22.563	0.718702	-21.979		0.47391	-21.7079	0.47379	-21.8082	0.473722	-11.8204	0.0637306	-21.6443		0.32765	-21.4421	0.245861	-13.9246	0.249735	-14.0873	0.242397	-13.9234		0.4193	-21.3473	0.287015	-12.0457	0.28701	-12.1762	0.286962	-12.4139
0.52235	-21.1652	0.619216	-13.1637	0.330399	-22.5681	0.773378	-21.982		0.5216	-21.7086	0.521446	-21.8089	0.521357	-11.8748	0.127461	-21.6441		0.37398	-21.442	0.286835	-13.7931	0.287546	-13.9564	0.285813	-13.7678		0.46554	-21.3485	0.327328	-11.9274	0.32742	-12.0523	0.327536	-12.2763
0.57023	-21.1647	0.671656	-13.2429	0.409169	-22.5664	0.828053	-21.9838		0.56929	-21.7089	0.569102	-21.8092	0.568992	-11.8931	0.195238	-21.6428		0.42032	-21.4426	0.32781	-13.6145	0.325357	-13.7782	0.329229	-13.5624		0.51178	-21.3494	0.373636	-11.9185	0.373728	-12.0313	0.373857	-12.2569
0.62338	-21.1653	0.724096	-13.2753	0.487938	-22.5631	0.885369	-21.9809		0.62223	-21.7085	0.622	-21.8089	0.621866	-11.8705	0.263015	-21.641		0.46666	-21.4434	0.366441	-13.5912	0.363794	-13.7955	0.368085	-13.5663		0.55802	-21.3497	0.419944	-11.8661	0.420035	-11.974	0.420179	-12.1924
0.67654	-21.1652	0.768944	-13.4049	0.566708	-22.5601	0.942684	-21.978		0.67517	-21.7077	0.674899	-21.808	0.674741	-11.8039	0.330792	-21.6432		0.51299	-21.4441	0.405072	-13.5231	0.402231	-13.7614	0.406941	-13.5255		0.60935	-21.3493	0.466253	-11.9066	0.466343	-12.0199	0.4665	-12.2446
0.72969	-21.1645	0.813793	-13.501	0.645398	-22.5631	1	-21.9754		0.72811	-21.7063	0.727797	-21.8067	0.727616	-11.7649	0.410782	-21.6426		0.55933	-21.4443	0.443704	-13.4118	0.440668	-13.6761	0.445797	-13.4379		0.66068	-21.3483	0.512561	-11.9822	0.51265	-12.098	0.512822	-12.3256
0.77667	-21.1664	0.858641	-13.5608	0.724089	-22.5664	0	--		0.77451	-21.707	0.774081	-21.8073	0.773832	-11.8757	0.490773	-21.6426		0.61076	-21.444	0.482335	-13.2612	0.479105	-13.5432	0.484653	-13.3065		0.71201	-21.3468	0.55887	-12.0078	0.558958	-12.1245	0.559143	-12.353
0.82366	-21.1677	0.905761	-13.4192	0.791135	-22.5619	0	-21.9754		0.82091	-21.7073	0.820365	-21.8076	0.820048	-11.9575	0.570763	-21.6405		0.6622	-21.4432	0.520967	-13.0775	0.517542	-13.3727	0.523509	-13.1371		0.75185	-21.3468	0.597421	-11.99	0.597509	-12.1061	0.597706	-12.334
0.87064	-21.1684	0.95288	-13.2438	0.85818	-22.5591	0.0546755	-21.9739		0.86731	-21.7073	0.86665	-21.8074	0.866263	-12.007	0.650673	-21.6426		0.71363	-21.4424	0.559598	-12.8715	0.555979	-13.2376	0.562365	-12.9717		0.7917	-21.3471	0.635973	-11.9373	0.63606	-12.0517	0.636269	-12.2775
0.91376	-21.1673	1	-13.0481	0.92909	-22.5598	0.109351	-21.972		0.91154	-21.7081	0.9111	-21.8084	0.910842	-11.8956	0.730584	-21.6426		0.75419	-21.4424	0.598191	-13.0773	0.594377	-13.3725	0.601182	-13.137		0.83155	-21.3477	0.674525	-11.8518	0.674611	-11.963	0.674831	-12.1855
0.95688	-21.166	0	--	1	-22.5601	0.164027	-21.97		0.95577	-21.7087	0.95555	-21.809	0.955421	-11.8784	0.801561	-21.6435		0.79475	-21.4423	0.636783	-13.2609	0.632776	-13.5429	0.64	-13.3062		0.87366	-21.3474	0.713076	-11.888	0.713162	-11.9978	0.713394	-12.2189
1	-21.1647	0	-13.034	0	--	0.218702	-21.9685		1	-21.7089	1	-21.8092	1	-11.8931	0.872539	-21.6441		0.8353	-21.4431	0.675376	-13.4114	0.671174	-13.6757	0.678817	-13.4375		0.91577	-21.3485	0.753358	-11.9923	0.753515	-12.1177	0.753849	-12.3572
0	--	0.0471196	-12.8203	0	-22.5588	0.273378	-21.9691		0	--	0	--	0	--	0.936269	-21.6443		0.87648	-21.4426	0.713969	-13.5227	0.709573	-13.7612	0.717634	-13.5253		0.95789	-21.3494	0.793641	-12.126	0.793867	-12.2567	0.794304	-12.5015
0	-21.1647	0.0942392	-12.5951	0.0709098	-22.5584	0.328053	-21.9705		0	-21.7038	0	-21.8036	0	-11.6092	1	-21.6405		0.91765	-21.4435	0.754675	-13.7374	0.748344	-13.8335	0.759901	-13.7545		1	-21.3497	0.833923	-12.2182	0.83422	-12.3582	0.834759	-12.6064
0.04312	-21.1635	0.141359	-12.4874	0.14182	-22.5591	0.385369	-21.9694		0.04423	-21.7049	0.0444501	-21.805	0.0445789	-11.7606	0	--		0.95883	-21.4441	0.795382	-13.9091	0.787115	-14.0394	0.802168	-13.9324		0	--	0.875442	-12.0277	0.875665	-12.1557	0.87607	-12.3981
0.08624	-21.1623	0.188659	-12.6712	0.236109	-22.5628	0.442684	-21.9685		0.08846	-21.7062	0.0889002	-21.8063	0.0891577	-11.8352	0	-21.64		1	-21.4443	0.836088	-14.0318	0.825886	-14.1935	0.844435	-14.0502		0	-21.3477	0.916961	-11.9269	0.91711	-12.0413	0.91738	-12.2678
0.12936	-21.1614	0.235958	-12.8706	0.330399	-22.5681	0.5	-21.9678		0.13269	-21.7072	0.13335	-21.8074	0.133737	-11.766	0.0637306	-21.6417		0	--	0.877066	-13.7903	0.869415	-13.877	0.883327	-13.8249		0.04211	-21.3475	0.958481	-11.9873	0.958555	-12.1035	0.95869	-12.3315
0.17972	-21.161	0.283258	-13.0628	0.409169	-22.5625	0.554676	-21.9694		0.18222	-21.707	0.182718	-21.8072	0.183007	-11.7465	0.127461	-21.644		0	-21.4442	0.918044	-13.5074	0.912943	-13.5047	0.922218	-13.555		0.08423	-21.3469	1	-12.0078	1	-12.1245	1	-12.353
0.23009	-21.1599	0.330558	-13.2332	0.487938	-22.5589	0.609351	-21.9718		0.23176	-21.7062	0.232086	-21.8064	0.232277	-11.6893	0.195238	-21.6427		0.04117	-21.444	0.959022	-13.1945	0.956472	-13.2072	0.961109	-13.2537		0.12634	-21.3465	0	--	0	--	0	--
0.28045	-21.1608	0.389612	-13.1325	0.566708	-22.5588	0.664027	-21.9716		0.28129	-21.705	0.281454	-21.8054	0.281547	-11.5976	0.263015	-21.6409		0.08235	-21.4434	1	-12.8715	1	-13.2376	1	-12.9717		0.16845	-21.3462	0	-11.5763	0	-11.6798	0	-11.9092
0.33082	-21.1629	0.448667	-12.9777	0.645398	-22.5589	0.718702	-21.9714		0.33083	-21.7039	0.330822	-21.8044	0.330817	-11.716	0.330792	-21.6431		0.12352	-21.4425	0	--	0	--	0	--		0.22124	-21.346	0.0415193	-11.5597	0.0414449	-11.6639	0.0413101	-11.8904
0.3787	-21.1617	0.507721	-12.8593	0.724089	-22.5624	0.773378	-21.9712		0.37852	-21.7042	0.378478	-21.8045	0.378452	-11.6493	0.410782	-21.6411		0.1647	-21.4414	0	-12.87	0	-13.0177	0	-12.8883		0.27403	-21.3454	0.0830387	-11.8003	0.0828899	-11.9205	0.0826203	-12.1559
0.42658	-21.1604	0.566775	-13.034	0.791135	-22.5605	0.828053	-21.9707		0.42621	-21.7045	0.426134	-21.8046	0.426087	-11.7326	0.490773	-21.6417		0.20544	-21.4416	0.040978	-12.8525	0.0435284	-13.0914	0.0388911	-12.6091		0.32682	-21.3462	0.124558	-11.8295	0.124335	-11.9408	0.12393	-12.1648
0.47447	-21.1622	0.619216	-12.8815	0.85818	-22.5591	0.885369	-21.9717		0.47391	-21.7045	0.47379	-21.8045	0.473722	-11.7426	0.570763	-21.64		0.24617	-21.4417	0.081956	-12.7971	0.0870568	-13.1174	0.0777823	-12.5444		0.37306	-21.3459	0.166077	-11.7124	0.16578	-11.8081	0.165241	-12.0284
0.52235	-21.1637	0.671656	-12.9366	0.92909	-22.5584	0.942684	-21.9733		0.5216	-21.7042	0.521446	-21.8042	0.521357	-11.6901	0.650673	-21.6417		0.28691	-21.4419	0.122934	-12.7101	0.130585	-12.9735	0.116673	-12.4696		0.4193	-21.3464	0.20639	-11.6951	0.20619	-11.7901	0.205814	-12.0094
0.57023	-21.1647	0.724096	-13.0861	1	-22.5588	1	-21.9754		0.56929	-21.7038	0.569102	-21.8036	0.568992	-11.6092	0.730584	-21.6411		0.32765	-21.4421	0.163912	-12.6006	0.174114	-12.7858	0.155565	-12.3813		0.46554	-21.3469	0.246703	-11.6452	0.2466	-11.7366	0.246388	-11.9529
0.62338	-21.1635	0.768944	-12.8793	0	--	0	--		0.62223	-21.7043	0.622	-21.8043	0.621866	-11.6973	0.801561	-21.642		0.37398	-21.4419	0.204886	-12.8693	0.211924	-13.0087	0.198981	-12.6835		0.51178	-21.3475	0.287015	-11.7762	0.28701	-11.8805	0.286962	-12.1002
0.67654	-21.1618	0.813793	-12.6713	0	-22.5581	0	-21.9693		0.67517	-21.7045	0.674899	-21.8046	0.674741	-11.7501	0.872539	-21.644		0.42032	-21.4419	0.245861	-13.1408	0.249735	-13.2925	0.242397	-13.0018		0.55802	-21.3477	0.327328	-11.9268	0.32742	-12.0318	0.327536	-12.2667
0.72969	-21.1608	0.858641	-12.4874	0.0709098	-22.5574	0.0546755	-21.9692		0.72811	-21.7044	0.727797	-21.8046	0.727616	-11.697	0.936269	-21.6417		0.46666	-21.4432	0.286835	-13.3938	0.287546	-13.5532	0.285813	-13.3009		0.60935	-21.3474	0.373636	-11.8825	0.373728	-12.0021	0.373857	-12.2337
0.77667	-21.1608	0.905761	-12.5951	0.14182	-22.5568	0.109351	-21.9689		0.77451	-21.7057	0.774081	-21.8058	0.773832	-11.7529	1	-21.64		0.51299	-21.444	0.32781	-13.614	0.325357	-13.7754	0.329229	-13.556		0.66068	-21.3467	0.419944	-11.794	0.420035	-11.9117	0.420179	-12.1434
0.82366	-21.1613	0.95288	-12.8203	0.236109	-22.5543	0.164027	-21.9686		0.82091	-21.7067	0.820365	-21.8069	0.820048	-11.7762	0	--		0.55933	-21.4442	0.366441	-13.5911	0.363794	-13.7052	0.368085	-13.5031		0.71201	-21.3464	0.466253	-11.7753	0.466343	-11.8758	0.4665	-12.0852
0.87064	-21.1614	1	-13.034	0.330399	-22.5521	0.218702	-21.9683		0.86731	-21.7072	0.86665	-21.8074	0.866263	-11.766	0	-21.6398		0.61076	-21.4439	0.405072	-13.5228	0.402231	-13.5818	0.406941	-13.3999		0.75185	-21.3464	0.512561	-11.658	0.51265	-11.7491	0.512822	-11.948
0.91376	-21.1623	0	--	0.409169	-22.5545	0.273378	-21.9671		0.91154	-21.7062	0.9111	-21.8063	0.910842	-11.8352	0.0637306	-21.6395		0.6622	-21.4429	0.443704	-13.4114	0.440668	-13.4094	0.445797	-13.2521		0.7917	-21.3466	0.55887	-11.5763	0.558958	-11.6798	0.559143	-11.9092
0.95688	-21.1635	0	-12.5604	0.487938	-22.5563	0.328053	-21.9667		0.95577	-21.7049	0.95555	-21.805	0.955421	-11.7606	0.127461	-21.6368		0.71363	-21.4415	0.482335	-13.2607	0.479105	-13.1926	0.484653	-13.0646		0.83155	-21.3462	0.597421	-11.6369	0.597509	-11.7263	0.597706	-11.9234
1	-21.1647	0.0471196	-12.551	0.566708	-22.5581	0.385369	-21.9669		1	-21.7038	1	-21.8036	1	-11.6092	0.195238	-21.639		0.75419	-21.4417	0.520967	-13.0769	0.517542	-12.9392	0.523509	-12.8447		0.87366	-21.3465	0.635973	-11.7383	0.63606	-11.8358	0.636269	-12.0418
0	--	0.0942392	-12.5248	0.645398	-22.5563	0.442684	-21.9672		0	--	0	--	0	--	0.263015	-21.6398		0.79475	-21.442	0.559598	-12.87	0.555979	-13.0177	0.562365	-12.8883		0.91577	-21.3469	0.674525	-11.8243	0.674611	-11.929	0.674831	-12.1431
0	-21.1601	0.141359	-12.4873	0.724089	-22.5545	0.5	-21.9677		0	-21.7038	0	-21.8036	0	-11.6089	0.330792	-21.6368		0.8353	-21.4414	0.598191	-13.0767	0.594377	-12.9389	0.601182	-12.8445		0.95789	-21.3475	0.713076	-11.8283	0.713162	-11.9469	0.713394	-12.1788
0.04312	-21.1602	0.188659	-12.6706	0.791135	-22.5554	0.554676	-21.967		0.04423	-21.7049	0.0444501	-21.8049	0.0445789	-11.5693	0.410782	-21.6381		0.87648	-21.4425	0.636783	-13.2604	0.632776	-13.1921	0.64	-13.0642		1	-21.3477	0.753358	-11.7595	0.753515	-11.8681	0.753849	-12.0886
0.08624	-21.1607	0.235958	-12.87	0.85818	-22.5568	0.609351	-21.9671		0.08846	-21.7062	0.0889002	-21.8062	0.0891577	-11.6751	0.490773	-21.6395		0.91765	-21.4434	0.675376	-13.411	0.671174	-13.4088	0.678817	-13.2516		0	--	0.793641	-11.7477	0.793867	-11.8558	0.794304	-12.0771
0.12936	-21.1613	0.283258	-13.0623	0.92909	-22.5574	0.664027	-21.9678		0.13269	-21.7072	0.13335	-21.8074	0.133737	-11.7659	0.570763	-21.6398		0.95883	-21.444	0.713969	-13.5225	0.709573	-13.5812	0.717634	-13.3994		0	-21.3471	0.833923	-11.7124	0.83422	-11.8081	0.834759	-12.0284
0.17972	-21.1609	0.330558	-13.2326	1	-22.5581	0.718702	-21.9688		0.18222	-21.7069	0.182718	-21.8072	0.183007	-11.7465	0.650673	-21.6395		1	-21.4442	0.754675	-13.217	0.748344	-13.4258	0.759901	-13.0557		0.04211	-21.3467	0.875442	-11.8295	0.875665	-11.9408	0.87607	-12.1648
0.23009	-21.1598	0.389612	-12.9757	0	--	0.773378	-21.9698		0.23176	-21.7062	0.232086	-21.8064	0.232277	-11.6892	0.730584	-21.6381		0	--	0.795382	-12.9005	0.787115	-13.0717	0.802168	-12.7021		0.08423	-21.3458	0.916961	-11.8003	0.91711	-11.9205	0.91738	-12.1559
0.28045	-21.1608	0.448667	-12.7096	0	-22.5576	0.828053	-21.9706		0.28129	-21.705	0.281454	-21.8054	0.281547	-11.5975	0.801561	-21.6401		0	-21.4377	0.836088	-12.6006	0.825886	-12.7858	0.844435	-12.3813		0.12634	-21.3459	0.958481	-11.5597	0.958555	-11.6639	0.95869	-11.8904
0.33082	-21.1629	0.507721	-12.7797	0.0709098	-22.5562	0.885369	-21.9699		0.33083	-21.7039	0.330822	-21.8044	0.330817	-11.7159	0.872539	-21.6368		0.04117	-21.4385	0.877066	-12.7101	0.869415	-12.9735	0.883327	-12.4696		0.16845	-21.3461	1	-11.5763	1	-11.6798	1	-11.9092
0.3787	-21.1607	0.566775	-12.5604	0.14182	-22.5568	0.942684	-21.9694		0.37852	-21.7041	0.378478	-21.8045	0.378452	-11.6159	0.936269	-21.6395		0.08235	-21.4398	0.918044	-12.7971	0.912943	-13.1174	0.922218	-12.5444		0.22124	-21.3459	0	--	0	--	0	--
0.42658	-21.1604	0.619216	-12.7556	0.236109	-22.5541	1	-21.9693		0.42621	-21.7044	0.426134	-21.8046	0.426087	-11.5596	1	-21.6398		0.12352	-21.4414	0.959022	-12.8525	0.956472	-13.0914	0.961109	-12.6091		0.27403	-21.3454	0	-11.5336	0	-11.6133	0	-11.8052
0.47447	-21.1593	0.671656	-12.6958	0.330399	-22.5521	0	--		0.47391	-21.7045	0.47379	-21.8045	0.473722	-11.5464	0	--		0.1647	-21.4414	1	-12.87	1	-13.0177	1	-12.8883		0.32682	-21.3461	0.0415193	-11.5518	0.0414449	-11.6606	0.0413101	-11.8893
0.52235	-21.1599	0.724096	-12.8852	0.409169	-22.5533	0	-21.9393		0.5216	-21.7042	0.521446	-21.8042	0.521357	-11.5138	0	-21.6397		0.20544	-21.4416	0	--	0	--	0	--		0.37306	-21.3458	0.0830387	-11.5045	0.0828899	-11.6048	0.0826203	-11.8313
0.57023	-21.1601	0.768944	-12.7619	0.487938	-22.5559	0.0546755	-21.9389		0.56929	-21.7038	0.569102	-21.8036	0.568992	-11.6089	0.0637306	-21.639		0.24617	-21.4417	0	-12.8684	0	-12.6633	0	-12.6088		0.4193	-21.346	0.124558	-11.5478	0.124335	-11.6506	0.12393	-11.8665
0.62338	-21.1598	0.813793	-12.625	0.566708	-22.5576	0.109351	-21.9377		0.62223	-21.7043	0.622	-21.8042	0.621866	-11.5186	0.127461	-21.6367		0.28691	-21.4419	0.040978	-12.8494	0.0435284	-12.9887	0.0388911	-12.5923		0.46554	-21.3463	0.166077	-11.687	0.16578	-11.8068	0.165241	-12.0274
0.67654	-21.1593	0.858641	-12.4873	0.645398	-22.5559	0.164027	-21.9354		0.67517	-21.7045	0.674899	-21.8045	0.674741	-11.55	0.195238	-21.6389		0.32765	-21.4421	0.081956	-12.7941	0.0870568	-12.9034	0.0777823	-12.5355		0.51178	-21.3468	0.20639	-11.6698	0.20619	-11.7888	0.205814	-12.0084
0.72969	-21.1598	0.905761	-12.5248	0.724089	-22.5533	0.218702	-21.932		0.72811	-21.7043	0.727797	-21.8046	0.727616	-11.5914	0.263015	-21.6397		0.37398	-21.4417	0.122934	-12.7072	0.130585	-12.7683	0.116673	-12.4612		0.55802	-21.3471	0.246703	-11.6207	0.2466	-11.7354	0.246388	-11.952
0.77667	-21.1597	0.95288	-12.551	0.791135	-22.555	0.273378	-21.9274		0.77451	-21.7057	0.774081	-21.8058	0.773832	-11.6483	0.330792	-21.6367		0.42032	-21.4413	0.163912	-12.6005	0.174114	-12.7854	0.155565	-12.3726		0.60935	-21.3467	0.287015	-11.7671	0.28701	-11.8797	0.286962	-12.0997
0.82366	-21.1608	1	-12.5604	0.85818	-22.5568	0.328053	-21.9241		0.82091	-21.7067	0.820365	-21.8068	0.820048	-11.7226	0.410782	-21.638		0.46666	-21.4402	0.204886	-12.8687	0.211924	-13.0083	0.198981	-12.6793		0.66068	-21.3463	0.327328	-11.9103	0.32742	-12.0308	0.327536	-12.2659
0.87064	-21.1613	0	--	0.92909	-22.5562	0.385369	-21.9242		0.86731	-21.7072	0.86665	-21.8074	0.866263	-11.7659	0.490773	-21.6366		0.51299	-21.4389	0.245861	-13.1402	0.249735	-13.2921	0.242397	-12.9965		0.71201	-21.3456	0.373636	-11.6706	0.373728	-11.7769	0.373857	-11.9948
0.91376	-21.1607	0	-12.5556	1	-22.5576	0.442684	-21.9244		0.91154	-21.7062	0.9111	-21.8062	0.910842	-11.6751	0.570763	-21.6397		0.55933	-21.4377	0.286835	-13.3933	0.287546	-13.5528	0.285813	-13.2948		0.75185	-21.3456	0.419944	-11.7849	0.420035	-11.8941	0.420179	-12.114
0.95688	-21.1602	0.0471196	-12.5462	0	--	0.5	-21.9246		0.95577	-21.7049	0.95555	-21.8049	0.955421	-11.5693	0.650673	-21.6366		0.61076	-21.439	0.32781	-13.614	0.325357	-13.7752	0.329229	-13.5557		0.7917	-21.3455	0.466253	-11.6616	0.466343	-11.7755	0.4665	-12.0045
1	-21.1601	0.0942392	-12.5199	0	-22.5559	0.554676	-21.928		1	-21.7038	1	-21.8036	1	-11.6089	0.730584	-21.6379		0.6622	-21.4405	0.366441	-13.3341	0.363794	-13.4446	0.368085	-13.2597		0.83155	-21.3461	0.512561	-11.5542	0.51265	-11.6574	0.512822	-11.8854
0	--	0.141359	-12.4825	0.0709098	-22.5549	0.609351	-21.9309		0	--	0	--	0	--	0.801561	-21.6376		0.71363	-21.4414	0.405072	-13.0398	0.402231	-13.0892	0.406941	-12.943		0.87366	-21.3459	0.55887	-11.5336	0.558958	-11.6133	0.559143	-11.8052
0	-21.1562	0.188659	-12.3715	0.14182	-22.5507	0.664027	-21.933		0	-21.7035	0	-21.8036	0	-11.4571	0.872539	-21.6367		0.75419	-21.4416	0.443704	-12.7528	0.440668	-12.7336	0.445797	-12.6312		0.91577	-21.3458	0.597421	-11.5605	0.597509	-11.6642	0.597706	-11.8926
0.04312	-21.1562	0.235958	-12.3391	0.236109	-22.551	0.718702	-21.9341		0.04423	-21.7024	0.0444501	-21.8023	0.0445789	-11.4503	0.936269	-21.639		0.79475	-21.4416	0.482335	-12.5035	0.479105	-12.6031	0.484653	-12.4726		0.95789	-21.3467	0.635973	-11.6088	0.63606	-11.7208	0.636269	-11.9484
0.08624	-21.1561	0.283258	-12.2936	0.330399	-22.5519	0.773378	-21.9344		0.08846	-21.7013	0.0889002	-21.8016	0.0891577	-11.2956	1	-21.6397		0.8353	-21.4414	0.520967	-12.6518	0.517542	-12.8543	0.523509	-12.7016		1	-21.3471	0.674525	-11.7325	0.674611	-11.8486	0.674831	-12.0793
0.12936	-21.156	0.330558	-12.2494	0.409169	-22.5526	0.828053	-21.9339		0.13269	-21.7004	0.13335	-21.8007	0.133737	-11.174	0	--		0.87648	-21.4414	0.559598	-12.8684	0.555979	-12.6633	0.562365	-12.6088		0	--	0.713076	-11.736	0.713162	-11.8434	0.713394	-12.0612
0.17972	-21.1573	0.389612	-12.4292	0.487938	-22.555	0.885369	-21.9369		0.18222	-21.7004	0.182718	-21.8018	0.183007	-11.2731	0	-21.6391		0.91765	-21.4398	0.598191	-12.652	0.594377	-12.8546	0.601182	-12.7018		0	-21.3464	0.753358	-11.6777	0.753515	-11.7761	0.753849	-11.9841
0.23009	-21.1589	0.448667	-12.6467	0.566708	-22.5559	0.942684	-21.9387		0.23176	-21.7016	0.232086	-21.8027	0.232277	-11.4202	0.0637306	-21.6371		0.95883	-21.4385	0.636783	-12.503	0.632776	-12.6036	0.64	-12.4731		0.04211	-21.3461	0.793641	-11.6201	0.793867	-11.726	0.794304	-11.9438
0.28045	-21.1583	0.507721	-12.4914	0.645398	-22.555	1	-21.9393		0.28129	-21.7027	0.281454	-21.8035	0.281547	-11.5729	0.127461	-21.6364		1	-21.4377	0.675376	-12.7519	0.671174	-12.7326	0.678817	-12.6303		0.08423	-21.3457	0.833923	-11.687	0.83422	-11.8068	0.834759	-12.0274
0.33082	-21.1568	0.566775	-12.5556	0.724089	-22.5526	0	--		0.33083	-21.7038	0.330822	-21.8043	0.330817	-11.4774	0.195238	-21.6345		0	--	0.713969	-13.0386	0.709573	-13.0877	0.717634	-12.9417		0.12634	-21.3452	0.875442	-11.5478	0.875665	-11.6506	0.87607	-11.8665
0.3787	-21.1585	0.619216	-12.4735	0.791135	-22.5519	0	-21.9309		0.37852	-21.7035	0.378478	-21.8044	0.378452	-11.5476	0.263015	-21.6346		0	-21.4377	0.754675	-12.9219	0.748344	-12.9996	0.759901	-12.78		0.16845	-21.3446	0.916961	-11.5045	0.91711	-11.6048	0.91738	-11.8313
0.42658	-21.1587	0.671656	-12.6539	0.85818	-22.5507	0.0546755	-21.9301		0.42621	-21.7031	0.426134	-21.8042	0.426087	-11.5517	0.330792	-21.6366		0.04117	-21.4381	0.795382	-12.7722	0.787115	-12.8744	0.802168	-12.5857		0.22124	-21.3447	0.958481	-11.5518	0.958555	-11.6606	0.95869	-11.8893
0.47447	-21.159	0.724096	-12.5005	0.92909	-22.5549	0.109351	-21.928		0.47391	-21.7025	0.47379	-21.8039	0.473722	-11.4533	0.410782	-21.6362		0.08235	-21.4391	0.836088	-12.6005	0.825886	-12.7854	0.844435	-12.3726		0.27403	-21.3453	1	-11.5336	1	-11.6133	1	-11.8052
0.52235	-21.1576	0.768944	-12.4807	1	-22.5559	0.164027	-21.9248		0.5216	-21.7027	0.521446	-21.8034	0.521357	-11.5033	0.490773	-21.6364		0.12352	-21.4402	0.877066	-12.7072	0.869415	-12.7683	0.883327	-12.4612		0.32682	-21.3446	0	--	0	--	0	--
0.57023	-21.1562	0.813793	-12.4411	0	--	0.218702	-21.9238		0.56929	-21.7035	0.569102	-21.8036	0.568992	-11.4571	0.570763	-21.6391		0.1647	-21.4414	0.918044	-12.7941	0.912943	-12.9034	0.922218	-12.5355		0.37306	-21.345	0	-11.525	0	-11.6098	0	-11.795
0.62338	-21.1577	0.858641	-12.4825	0	-22.5474	0.273378	-21.924		0.62223	-21.7026	0.622	-21.8034	0.621866	-11.4905	0.650673	-21.6364		0.20544	-21.441	0.959022	-12.8494	0.956472	-12.9887	0.961109	-12.5923		0.4193	-21.3454	0.0415193	-11.5171	0.0414449	-11.5965	0.0413101	-11.7881
0.67654	-21.1591	0.905761	-12.5199	0.0709098	-22.5482	0.328053	-21.922		0.67517	-21.7026	0.674899	-21.804	0.674741	-11.4777	0.730584	-21.6362		0.24617	-21.4404	1	-12.8684	1	-12.6633	1	-12.6088		0.46554	-21.3459	0.0830387	-11.4693	0.0828899	-11.5473	0.0826203	-11.7378
0.72969	-21.1593	0.95288	-12.5462	0.14182	-22.5507	0.385369	-21.9235		0.72811	-21.7032	0.727797	-21.8043	0.727616	-11.5472	0.801561	-21.6349		0.28691	-21.4396	0	--	0	--	0	--		0.51178	-21.3462	0.124558	-11.4204	0.124335	-11.5177	0.12393	-11.7406
0.77667	-21.1589	1	-12.5556	0.236109	-22.5509	0.442684	-21.9243		0.77451	-21.7019	0.774081	-21.8032	0.773832	-11.4303	0.872539	-21.6364		0.32765	-21.4387	0	-12.8684	0	-12.6599	0	-12.5995		0.55802	-21.3464	0.166077	-11.3269	0.16578	-11.41	0.165241	-11.6279
0.82366	-21.1572	0	--	0.330399	-22.5519	0.5	-21.9245		0.82091	-21.7006	0.820365	-21.802	0.820048	-11.2774	0.936269	-21.6371		0.37398	-21.4403	0.040978	-12.5583	0.0435284	-12.2564	0.0388911	-12.5832		0.60935	-21.3462	0.20639	-11.4385	0.20619	-11.524	0.205814	-11.7188
0.87064	-21.156	0	-12.4057	0.409169	-22.5497	0.554676	-21.9207		0.86731	-21.7004	0.86665	-21.8007	0.866263	-11.174	1	-21.6391		0.42032	-21.4409	0.081956	-12.3733	0.0870568	-12.3571	0.0777823	-12.3246		0.66068	-21.3456	0.246703	-11.6044	0.2466	-11.7026	0.246388	-11.9102
0.91376	-21.1561	0.0471196	-12.4172	0.487938	-22.548	0.609351	-21.9231		0.91154	-21.7013	0.9111	-21.8016	0.910842	-11.2956	0	--		0.46666	-21.4398	0.122934	-12.4821	0.130585	-12.571	0.116673	-12.2746		0.71201	-21.3456	0.287015	-11.5599	0.28701	-11.6501	0.286962	-11.8616
0.95688	-21.1562	0.0942392	-12.4477	0.566708	-22.5474	0.664027	-21.9271		0.95577	-21.7024	0.95555	-21.8023	0.955421	-11.4503	0	-21.639		0.51299	-21.4385	0.163912	-12.598	0.174114	-12.5953	0.155565	-12.3703		0.75185	-21.3454	0.327328	-11.45	0.32742	-11.5416	0.327536	-11.7441
1	-21.1562	0.141359	-12.4825	0.645398	-22.548	0.718702	-21.9302		1	-21.7035	1	-21.8036	1	-11.4571	0.0637306	-21.636		0.55933	-21.4377	0.204886	-12.357	0.211924	-12.3818	0.198981	-12.1077		0.7917	-21.3451	0.373636	-11.6253	0.373728	-11.7284	0.373857	-11.9414
0	--	0.188659	-12.3713	0.724089	-22.5497	0.773378	-21.9324		0	--	0	--	0	--	0.127461	-21.6363		0.61076	-21.4387	0.245861	-12.1682	0.249735	-12.1305	0.242397	-11.9237		0.83155	-21.3446	0.419944	-11.4152	0.420035	-11.506	0.420179	-11.7099
0	-21.1562	0.235958	-12.3388	0.791135	-22.5499	0.828053	-21.9338		0	-21.7035	0	-21.8036	0	-11.4566	0.195238	-21.6344		0.6622	-21.44	0.286835	-12.049	0.287546	-11.9341	0.285813	-11.8646		0.87366	-21.3452	0.466253	-11.4934	0.466343	-11.5929	0.4665	-11.8162
0.04312	-21.1562	0.283258	-12.2931	0.85818	-22.5507	0.885369	-21.9297		0.04423	-21.7024	0.0444501	-21.8023	0.0445789	-11.3475	0.263015	-21.6345		0.71363	-21.4413	0.32781	-11.9959	0.325357	-11.8083	0.329229	-11.8274		0.91577	-21.3457	0.512561	-11.4935	0.51265	-11.6012	0.512822	-11.825
0.08624	-21.1561	0.330558	-12.249	0.92909	-22.5482	0.942684	-21.9304		0.08846	-21.7013	0.0889002	-21.8016	0.0891577	-11.2509	0.330792	-21.6366		0.75419	-21.4411	0.366441	-12.0403	0.363794	-11.9321	0.368085	-11.9163		0.95789	-21.3461	0.55887	-11.525	0.558958	-11.6098	0.559143	-11.795
0.12936	-21.156	0.389612	-12.3133	1	-22.5474	1	-21.9309		0.13269	-21.7004	0.13335	-21.8007	0.133737	-11.1739	0.410782	-21.6329		0.79475	-21.4411	0.405072	-12.1128	0.402231	-12.1184	0.406941	-12.0626		1	-21.3464	0.597421	-11.4629	0.597509	-11.5691	0.597706	-11.7917
0.17972	-21.1573	0.448667	-12.3627	0	--	0	--		0.18222	-21.7004	0.182718	-21.8018	0.183007	-11.2731	0.490773	-21.6358		0.8353	-21.4414	0.443704	-12.2548	0.440668	-12.3489	0.445797	-12.2532		0	--	0.635973	-11.5178	0.63606	-11.6189	0.636269	-11.8441
0.23009	-21.1589	0.507721	-12.3934	0	-22.5412	0	-21.9309		0.23176	-21.7016	0.232086	-21.8027	0.232277	-11.4202	0.570763	-21.639		0.87648	-21.4402	0.482335	-12.4403	0.479105	-12.4146	0.484653	-12.3572		0	-21.3461	0.674525	-11.4507	0.674611	-11.5472	0.674831	-11.767
0.28045	-21.1583	0.566775	-12.4057	0.0709098	-22.5408	0.0546755	-21.9301		0.28129	-21.7027	0.281454	-21.8035	0.281547	-11.5728	0.650673	-21.6358		0.91765	-21.4391	0.520967	-12.6509	0.517542	-12.3789	0.523509	-12.36		0.04211	-21.346	0.713076	-11.4969	0.713162	-11.5945	0.713394	-11.8032
0.33082	-21.1568	0.619216	-12.3956	0.14182	-22.5398	0.109351	-21.928		0.33083	-21.7038	0.330822	-21.8043	0.330817	-11.4773	0.730584	-21.6329		0.95883	-21.4381	0.559598	-12.8684	0.555979	-12.6599	0.562365	-12.5995		0.08423	-21.3454	0.753358	-11.5142	0.753515	-11.6159	0.753849	-11.8292
0.3787	-21.1576	0.671656	-12.3713	0.236109	-22.5398	0.164027	-21.9248		0.37852	-21.7033	0.378478	-21.8042	0.378452	-11.5285	0.801561	-21.6346		1	-21.4377	0.598191	-12.6512	0.594377	-12.3792	0.601182	-12.3602		0.12634	-21.3449	0.793641	-11.4717	0.793867	-11.5584	0.794304	-11.7532
0.42658	-21.1585	0.724096	-12.3318	0.330399	-22.5383	0.218702	-21.9212		0.42621	-21.7028	0.426134	-21.804	0.426087	-11.3734	0.872539	-21.6363		0	--	0.636783	-12.4407	0.632776	-12.4141	0.64	-12.3567		0.16845	-21.3445	0.833923	-11.3269	0.83422	-11.41	0.834759	-11.6279
0.47447	-21.1571	0.768944	-12.2986	0.409169	-22.5392	0.273378	-21.9197		0.47391	-21.7022	0.47379	-21.8037	0.473722	-11.3789	0.936269	-21.636		0	-21.4377	0.675376	-12.2553	0.671174	-12.3496	0.678817	-12.2538		0.22124	-21.3446	0.875442	-11.4204	0.875665	-11.5177	0.87607	-11.7406
0.52235	-21.1561	0.813793	-12.3526	0.487938	-22.5404	0.328053	-21.922		0.5216	-21.7027	0.521446	-21.8032	0.521357	-11.3807	1	-21.639		0.04117	-21.438	0.713969	-12.1133	0.709573	-12.1193	0.717634	-12.0633		0.27403	-21.3453	0.916961	-11.4693	0.91711	-11.5473	0.91738	-11.7378
0.57023	-21.1562	0.858641	-12.4825	0.566708	-22.5412	0.385369	-21.9198		0.56929	-21.7035	0.569102	-21.8036	0.568992	-11.4566	0	--		0.08235	-21.439	0.754675	-12.2493	0.748344	-12.2944	0.759901	-12.0371		0.32682	-21.3445	0.958481	-11.5171	0.958555	-11.5965	0.95869	-11.7881
0.62338	-21.1562	0.905761	-12.4477	0.645398	-22.5404	0.442684	-21.9188		0.62223	-21.7025	0.622	-21.8032	0.621866	-11.3714	0	-21.6344		0.12352	-21.4402	0.795382	-12.4187	0.787115	-12.4826	0.802168	-12.16		0.37306	-21.3448	1	-11.525	1	-11.6098	1	-11.795
0.67654	-21.1574	0.95288	-12.4172	0.724089	-22.5392	0.5	-21.9181		0.67517	-21.7024	0.674899	-21.8038	0.674741	-11.3498	0.0637306	-21.6346		0.1647	-21.4414	0.836088	-12.598	0.825886	-12.5953	0.844435	-12.3703		0.4193	-21.3449	0	--	0	--	0	--
0.72969	-21.1582	1	-12.4057	0.791135	-22.5399	0.554676	-21.9198		0.72811	-21.703	0.727797	-21.8041	0.727616	-11.4305	0.127461	-21.6356		0.20544	-21.441	0.877066	-12.4821	0.869415	-12.571	0.883327	-12.2746		0.46554	-21.3453	0	-11.3029	0	-11.4019	0	-11.6183
0.77667	-21.1581	0	--	0.85818	-22.5398	0.609351	-21.9222		0.77451	-21.7017	0.774081	-21.803	0.773832	-11.3338	0.195238	-21.6338		0.24617	-21.4404	0.918044	-12.3733	0.912943	-12.3571	0.922218	-12.3246		0.51178	-21.3461	0.0415193	-11.5082	0.0414449	-11.593	0.0413101	-11.7778
0.82366	-21.157	0	-12.4009	0.92909	-22.5408	0.664027	-21.9245		0.82091	-21.7005	0.820365	-21.8019	0.820048	-11.2365	0.263015	-21.6324		0.28691	-21.4396	0.959022	-12.5583	0.956472	-12.2564	0.961109	-12.5832		0.55802	-21.3461	0.0830387	-11.4607	0.0828899	-11.5437	0.0826203	-11.7276
0.87064	-21.156	0.0471196	-12.4125	1	-22.5412	0.718702	-21.9264		0.86731	-21.7004	0.86665	-21.8007	0.866263	-11.1739	0.330792	-21.631		0.32765	-21.4387	1	-12.8684	1	-12.6599	1	-12.5995		0.60935	-21.346	0.124558	-11.3926	0.124335	-11.4689	0.12393	-11.6577
0.91376	-21.1561	0.0942392	-12.4429	0	--	0.773378	-21.9273		0.91154	-21.7013	0.9111	-21.8016	0.910842	-11.2509	0.410782	-21.6327		0.37398	-21.4386	0	--	0	--	0	--		0.66068	-21.3452	0.166077	-11.3091	0.16578	-11.4098	0.165241	-11.6276
0.95688	-21.1562	0.141359	-12.383	0	-22.5404	0.828053	-21.9274		0.95577	-21.7024	0.95555	-21.8023	0.955421	-11.3475	0.490773	-21.6358		0.42032	-21.4384	0	-12.267	0	-12.0934	0	-12.0924		0.71201	-21.3448	0.20639	-11.4364	0.20619	-11.5234	0.205814	-11.7182
1	-21.1562	0.188659	-12.3381	0.0709098	-22.54	0.885369	-21.9291		1	-21.7035	1	-21.8036	1	-11.4566	0.570763	-21.6344		0.46666	-21.438	0.040978	-12.2956	0.0435284	-12.183	0.0388911	-12.1167		0.75185	-21.3448	0.246703	-11.6004	0.2466	-11.7018	0.246388	-11.9095
0	--	0.235958	-12.2508	0.14182	-22.5398	0.942684	-21.9304		0	--	0	--	0	--	0.650673	-21.6358		0.51299	-21.4376	0.081956	-12.3712	0.0870568	-12.2301	0.0777823	-12.1825		0.7917	-21.3449	0.287015	-11.5366	0.28701	-11.6489	0.286962	-11.8605
0	-21.1558	0.283258	-12.2266	0.236109	-22.5394	1	-21.9309		0	-21.7007	0	-21.8025	0	-11.2272	0.730584	-21.6327		0.55933	-21.4377	0.122934	-12.4797	0.130585	-12.4051	0.116673	-12.2682		0.83155	-21.3445	0.327328	-11.4491	0.32742	-11.5404	0.327536	-11.7421
0.04312	-21.1558	0.330558	-12.2484	0.330399	-22.5383	0	--		0.04423	-21.7006	0.0444501	-21.8023	0.0445789	-11.2177	0.801561	-21.6342		0.61076	-21.4377	0.163912	-12.5977	0.174114	-12.5952	0.155565	-12.3632		0.87366	-21.3449	0.373636	-11.4255	0.373728	-11.5164	0.373857	-11.7234
0.08624	-21.1559	0.389612	-12.1777	0.409169	-22.5391	0	-21.9232		0.08846	-21.7001	0.0889002	-21.8015	0.0891577	-11.1905	0.872539	-21.6356		0.6622	-21.4381	0.204886	-12.3563	0.211924	-12.3813	0.198981	-12.1062		0.91577	-21.3454	0.419944	-11.3984	0.420035	-11.4945	0.420179	-11.7092
0.12936	-21.156	0.448667	-12.1955	0.487938	-22.5398	0.0546755	-21.923		0.13269	-21.7004	0.13335	-21.8007	0.133737	-11.1579	0.936269	-21.6346		0.71363	-21.4385	0.245861	-12.1675	0.249735	-12.1299	0.242397	-11.9208		0.95789	-21.346	0.466253	-11.3169	0.466343	-11.3866	0.4665	-11.5911
0.17972	-21.1553	0.507721	-12.3463	0.566708	-22.5404	0.109351	-21.9224		0.18222	-21.7002	0.182718	-21.8016	0.183007	-11.1637	1	-21.6344		0.75419	-21.4394	0.286835	-12.0483	0.287546	-11.9335	0.285813	-11.857		1	-21.3461	0.512561	-11.4107	0.51265	-11.4848	0.512822	-11.6658
0.23009	-21.1552	0.566775	-12.4009	0.645398	-22.5398	0.164027	-21.9233		0.23176	-21.7014	0.232086	-21.8025	0.232277	-11.1933	0	--		0.79475	-21.4405	0.32781	-11.9959	0.325357	-11.8081	0.329229	-11.8273		0	--	0.55887	-11.3029	0.558958	-11.4019	0.559143	-11.6183
0.28045	-21.1557	0.619216	-12.3681	0.724089	-22.5391	0.218702	-21.9211		0.28129	-21.7025	0.281454	-21.8034	0.281547	-11.3381	0	-21.6343		0.8353	-21.4414	0.366441	-12.0252	0.363794	-11.8524	0.368085	-11.8685		0	-21.3455	0.597421	-11.4289	0.597509	-11.5044	0.597706	-11.6863
0.33082	-21.1568	0.671656	-12.221	0.791135	-22.5397	0.273378	-21.9197		0.33083	-21.7037	0.330822	-21.8043	0.330817	-11.4773	0.0637306	-21.6337		0.87648	-21.4402	0.405072	-12.1122	0.402231	-11.9154	0.406941	-11.9278		0.04211	-21.3453	0.635973	-11.345	0.63606	-11.4157	0.636269	-11.5948
0.3787	-21.1562	0.724096	-12.156	0.85818	-22.5398	0.328053	-21.9195		0.37852	-21.7023	0.378478	-21.803	0.378452	-11.4007	0.127461	-21.6355		0.91765	-21.439	0.443704	-12.254	0.440668	-11.9811	0.445797	-11.9898		0.08423	-21.3449	0.674525	-11.3341	0.674611	-11.4263	0.674831	-11.633
0.42658	-21.156	0.768944	-12.2406	0.92909	-22.54	0.385369	-21.9193		0.42621	-21.7007	0.426134	-21.8015	0.426087	-11.303	0.195238	-21.6337		0.95883	-21.438	0.482335	-12.4394	0.479105	-12.1179	0.484653	-12.135		0.12634	-21.3444	0.713076	-11.3933	0.713162	-11.4841	0.713394	-11.6915
0.47447	-21.1558	0.813793	-12.3519	1	-22.5404	0.442684	-21.9188		0.47391	-21.7015	0.47379	-21.8014	0.473722	-11.2922	0.263015	-21.6323		1	-21.4377	0.520967	-12.3297	0.517542	-12.1844	0.523509	-12.1638		0.16845	-21.3444	0.753358	-11.4371	0.753515	-11.5279	0.753849	-11.7285
0.52235	-21.1558	0.858641	-12.383	0	--	0.5	-21.918		0.5216	-21.7017	0.521446	-21.8027	0.521357	-11.3389	0.330792	-21.631		0	--	0.559598	-12.267	0.555979	-12.0934	0.562365	-12.0924		0.22124	-21.3444	0.793641	-11.3668	0.793867	-11.4486	0.794304	-11.6677
0.57023	-21.1558	0.905761	-12.4429	0	-22.5384	0.554676	-21.9198		0.56929	-21.7007	0.569102	-21.8025	0.568992	-11.2272	0.410782	-21.6325		0	-21.4374	0.598191	-12.3296	0.594377	-12.1842	0.601182	-12.1637		0.27403	-21.344	0.833923	-11.3091	0.83422	-11.4098	0.834759	-11.6276
0.62338	-21.1558	0.95288	-12.4125	0.0709098	-22.5388	0.609351	-21.9222		0.62223	-21.7018	0.622	-21.8025	0.621866	-11.3515	0.490773	-21.6336		0.04117	-21.4373	0.636783	-12.4398	0.632776	-12.1184	0.64	-12.1354		0.32682	-21.3445	0.875442	-11.3926	0.875665	-11.4689	0.87607	-11.6577
0.67654	-21.1559	1	-12.4009	0.14182	-22.539	0.664027	-21.9245		0.67517	-21.7012	0.674899	-21.801	0.674741	-11.272	0.570763	-21.6343		0.08235	-21.4369	0.675376	-12.2545	0.671174	-11.9813	0.678817	-11.99		0.37306	-21.3447	0.916961	-11.4607	0.91711	-11.5437	0.91738	-11.7276
0.72969	-21.156	0	--	0.236109	-22.5375	0.718702	-21.9263		0.72811	-21.7012	0.727797	-21.802	0.727616	-11.3372	0.650673	-21.6336		0.12352	-21.4364	0.713969	-12.1127	0.709573	-11.9156	0.717634	-11.928		0.4193	-21.3446	0.958481	-11.5082	0.958555	-11.593	0.95869	-11.7778
0.77667	-21.1554	0	-12.0448	0.330399	-22.5378	0.773378	-21.9273		0.77451	-21.7006	0.774081	-21.8017	0.773832	-11.2042	0.730584	-21.6325		0.1647	-21.4357	0.754675	-12.1726	0.748344	-12.0788	0.759901	-11.974		0.46554	-21.3452	1	-11.3029	1	-11.4019	1	-11.6183
0.82366	-21.1554	0.0471196	-12.0869	0.409169	-22.5375	0.828053	-21.9272		0.82091	-21.7005	0.820365	-21.8013	0.820048	-11.1906	0.801561	-21.6341		0.20544	-21.436	0.795382	-12.3452	0.787115	-12.3389	0.802168	-12.1076		0.51178	-21.3455	0	--	0	--	0	--
0.87064	-21.156	0.0942392	-12.2058	0.487938	-22.5389	0.885369	-21.9291		0.86731	-21.7004	0.86665	-21.8007	0.866263	-11.1579	0.872539	-21.6355		0.24617	-21.4367	0.836088	-12.5977	0.825886	-12.5952	0.844435	-12.3632		0.55802	-21.3455	0	-11.3022	0	-11.4016	0	-11.6168
0.91376	-21.1559	0.141359	-12.3829	0.566708	-22.5384	0.942684	-21.9248		0.91154	-21.7001	0.9111	-21.8015	0.910842	-11.1905	0.936269	-21.6337		0.28691	-21.4377	0.877066	-12.4797	0.869415	-12.4051	0.883327	-12.2682		0.60935	-21.3454	0.0415193	-11.2419	0.0414449	-11.3323	0.0413101	-11.5377
0.95688	-21.1558	0.188659	-12.3374	0.645398	-22.5389	1	-21.9232		0.95577	-21.7006	0.95555	-21.8023	0.955421	-11.2177	1	-21.6343		0.32765	-21.4387	0.918044	-12.3712	0.912943	-12.2301	0.922218	-12.1825		0.66068	-21.345	0.0830387	-11.387	0.0828899	-11.4848	0.0826203	-11.6954
1	-21.1558	0.235958	-12.25	0.724089	-22.5375	0	--		1	-21.7007	1	-21.8025	1	-11.2272	0	--		0.37398	-21.4385	0.959022	-12.2956	0.956472	-12.183	0.961109	-12.1167		0.71201	-21.3444	0.124558	-11.3841	0.124335	-11.4654	0.12393	-11.6476
0	--	0.283258	-12.2259	0.791135	-22.5388	0	-21.9232		0	--	0	--	0	--	0	-21.634		0.42032	-21.4381	1	-12.267	1	-12.0934	1	-12.0924		0.75185	-21.3442	0.166077	-11.2953	0.16578	-11.3678	0.165241	-11.5543
0	-21.1558	0.330558	-12.2481	0.85818	-22.539	0.0546755	-21.9229		0	-21.7007	0	-21.8025	0	-11.2261	0.0637306	-21.6333		0.46666	-21.4376	0	--	0	--	0	--		0.7917	-21.3442	0.20639	-11.3115	0.20619	-11.3968	0.205814	-11.6131
0.04312	-21.1558	0.389612	-12.1581	0.92909	-22.5388	0.109351	-21.9222		0.04423	-21.7005	0.0444501	-21.8022	0.0445789	-11.2167	0.127461	-21.6337		0.51299	-21.4371	0	-12.2652	0	-12.0928	0	-12.091		0.83155	-21.3444	0.246703	-11.2778	0.2466	-11.3597	0.246388	-11.5711
0.08624	-21.1559	0.448667	-12.1109	1	-22.5384	0.164027	-21.9212		0.08846	-21.7	0.0889002	-21.8015	0.0891577	-11.1895	0.195238	-21.6333		0.55933	-21.4374	0.040978	-12.2936	0.0435284	-12.1127	0.0388911	-12.1139		0.87366	-21.3444	0.287015	-11.3179	0.28701	-11.3974	0.286962	-11.594
0.12936	-21.156	0.507721	-12.0625	0	--	0.218702	-21.9203		0.13269	-21.7004	0.13335	-21.8007	0.133737	-11.1579	0.263015	-21.6315		0.61076	-21.4371	0.081956	-12.2968	0.0870568	-11.9336	0.0777823	-12.1777		0.91577	-21.3449	0.327328	-11.4406	0.32742	-11.5279	0.327536	-11.7351
0.17972	-21.1553	0.566775	-12.0448	0	-22.5373	0.273378	-21.9179		0.18222	-21.7002	0.182718	-21.8016	0.183007	-11.1637	0.330792	-21.6309		0.6622	-21.4377	0.122934	-12.1166	0.130585	-11.7463	0.116673	-12.1031		0.95789	-21.3453	0.373636	-11.413	0.373728	-11.5122	0.373857	-11.713
0.23009	-21.1552	0.619216	-12.0588	0.0709098	-22.5378	0.328053	-21.9195		0.23176	-21.7014	0.232086	-21.8025	0.232277	-11.1933	0.410782	-21.6321		0.71363	-21.4383	0.163912	-12.0262	0.174114	-11.6952	0.155565	-11.9662		1	-21.3455	0.419944	-11.37	0.420035	-11.4632	0.420179	-11.6704
0.28045	-21.1557	0.671656	-12.0979	0.14182	-22.539	0.385369	-21.9193		0.28129	-21.7025	0.281454	-21.8034	0.281547	-11.3381	0.490773	-21.633		0.75419	-21.4372	0.204886	-12.0194	0.211924	-11.6971	0.198981	-11.9521		0	--	0.466253	-11.2937	0.466343	-11.3851	0.4665	-11.5658
0.33082	-21.1568	0.724096	-12.154	0.236109	-22.5372	0.442684	-21.9173		0.33083	-21.7037	0.330822	-21.8043	0.330817	-11.4773	0.570763	-21.634		0.79475	-21.4363	0.245861	-12.0029	0.249735	-11.7068	0.242397	-11.9139		0	-21.3442	0.512561	-11.2096	0.51265	-11.2979	0.512822	-11.5018
0.3787	-21.1555	0.768944	-12.2304	0.330399	-22.5378	0.5	-21.918		0.37852	-21.7021	0.378478	-21.8028	0.378452	-11.3282	0.650673	-21.633		0.8353	-21.4357	0.286835	-11.9886	0.287546	-11.7367	0.285813	-11.8355		0.04211	-21.3446	0.55887	-11.3022	0.558958	-11.4016	0.559143	-11.6168
0.42658	-21.1547	0.813793	-12.3104	0.409169	-22.5367	0.554676	-21.9187		0.42621	-21.7005	0.426134	-21.8013	0.426087	-11.2439	0.730584	-21.6321		0.87648	-21.4364	0.32781	-11.9953	0.325357	-11.8028	0.329229	-11.821		0.08423	-21.3445	0.597421	-11.1962	0.597509	-11.2839	0.597706	-11.4875
0.47447	-21.1546	0.858641	-12.3829	0.487938	-22.5365	0.609351	-21.9191		0.47391	-21.7015	0.47379	-21.8013	0.473722	-11.2104	0.801561	-21.6329		0.91765	-21.4369	0.366441	-12.0249	0.363794	-11.7822	0.368085	-11.8009		0.12634	-21.3436	0.635973	-11.2655	0.63606	-11.356	0.636269	-11.5612
0.52235	-21.1551	0.905761	-12.2058	0.566708	-22.5373	0.664027	-21.9215		0.5216	-21.7015	0.521446	-21.8026	0.521357	-11.1283	0.872539	-21.6337		0.95883	-21.4373	0.405072	-12.1003	0.402231	-11.7859	0.406941	-11.8386		0.16845	-21.3443	0.674525	-11.316	0.674611	-11.4045	0.674831	-11.5967
0.57023	-21.1558	0.95288	-12.0869	0.645398	-22.5365	0.718702	-21.924		0.56929	-21.7007	0.569102	-21.8025	0.568992	-11.2261	0.936269	-21.6333		1	-21.4374	0.443704	-12.1632	0.440668	-11.9111	0.445797	-11.954		0.22124	-21.3443	0.713076	-11.3798	0.713162	-11.4774	0.713394	-11.6743
0.62338	-21.155	1	-12.0448	0.724089	-22.5367	0.773378	-21.926		0.62223	-21.7016	0.622	-21.8025	0.621866	-11.1188	1	-21.634		0	--	0.482335	-12.217	0.479105	-12.0369	0.484653	-12.0424		0.27403	-21.3439	0.753358	-11.3684	0.753515	-11.4633	0.753849	-11.6805
0.67654	-21.1546	0	--	0.791135	-22.5376	0.828053	-21.9272		0.67517	-21.7011	0.674899	-21.801	0.674741	-11.2442	0	--		0	-21.4357	0.520967	-12.2529	0.517542	-12.0743	0.523509	-12.0777		0.32682	-21.3444	0.793641	-11.3504	0.793867	-11.4468	0.794304	-11.6386
0.72969	-21.1549	0	-9.37114	0.85818	-22.539	0.885369	-21.9253		0.72811	-21.701	0.727797	-21.8018	0.727616	-11.2302	0	-21.6322		0.04117	-21.4352	0.559598	-12.2652	0.555979	-12.0928	0.562365	-12.091		0.37306	-21.3443	0.833923	-11.2953	0.83422	-11.3678	0.834759	-11.5543
0.77667	-21.1549	0.0471196	-9.3249	0.92909	-22.5378	0.942684	-21.9238		0.77451	-21.7004	0.774081	-21.8015	0.773832	-11.1877	0.0637306	-21.6329		0.08235	-21.4344	0.598191	-12.2529	0.594377	-12.0743	0.601182	-12.0777		0.4193	-21.3444	0.875442	-11.3841	0.875665	-11.4654	0.87607	-11.6476
0.82366	-21.1553	0.0942392	-9.19433	1	-22.5373	1	-21.9232		0.82091	-21.7004	0.820365	-21.8011	0.820048	-11.1886	0.127461	-21.6336		0.12352	-21.4351	0.636783	-12.2171	0.632776	-12.037	0.64	-12.0425		0.46554	-21.3449	0.916961	-11.387	0.91711	-11.4848	0.91738	-11.6954
0.87064	-21.156	0.141359	-9.00332	0	--	0	--		0.86731	-21.7004	0.86665	-21.8007	0.866263	-11.1579	0.195238	-21.6332		0.1647	-21.4357	0.675376	-12.1634	0.671174	-11.9116	0.678817	-11.9544		0.51178	-21.3444	0.958481	-11.2419	0.958555	-11.3323	0.95869	-11.5377
0.91376	-21.1559	0.188659	-9.1105	0	-22.536	0	-21.9197		0.91154	-21.7	0.9111	-21.8015	0.910842	-11.1895	0.263015	-21.6314		0.20544	-21.436	0.713969	-12.1005	0.709573	-11.7862	0.717634	-11.8389		0.55802	-21.3442	1	-11.3022	1	-11.4016	1	-11.6168
0.95688	-21.1558	0.235958	-9.07226	0.0709098	-22.5358	0.0546755	-21.9212		0.95577	-21.7005	0.95555	-21.8022	0.955421	-11.2167	0.330792	-21.6309		0.24617	-21.4367	0.754675	-12.0791	0.748344	-11.7352	0.759901	-11.9535		0.60935	-21.3444	0	--	0	--	0	--
1	-21.1558	0.283258	-8.88676	0.14182	-22.5351	0.109351	-21.9222		1	-21.7007	1	-21.8025	1	-11.2261	0.410782	-21.6308		0.28691	-21.4377	0.795382	-12.0503	0.787115	-11.7049	0.802168	-12.0036		0.66068	-21.345	0	-11.1375	0	-11.222	0	-11.4236
0	--	0.330558	-8.57981	0.236109	-22.5362	0.164027	-21.9212		0	--	0	--	0	--	0.490773	-21.6308		0.32765	-21.4387	0.836088	-12.0262	0.825886	-11.6952	0.844435	-11.9662		0.71201	-21.3443	0.0415193	-11.098	0.0414449	-11.1799	0.0413101	-11.3816
0	-21.1507	0.389612	-8.91527	0.330399	-22.5343	0.218702	-21.9203		0	-21.7004	0	-21.8023	0	-11.0786	0.570763	-21.6322		0.37398	-21.437	0.877066	-12.1166	0.869415	-11.7463	0.883327	-12.1031		0.75185	-21.3439	0.0830387	-11.1281	0.0828899	-11.2122	0.0826203	-11.4179
0.04312	-21.1505	0.448667	-9.16456	0.409169	-22.5365	0.273378	-21.9179		0.04423	-21.7003	0.0444501	-21.8021	0.0445789	-11.0888	0.650673	-21.6309		0.42032	-21.4356	0.918044	-12.2968	0.912943	-11.9336	0.922218	-12.1777		0.7917	-21.3438	0.124558	-11.2106	0.124335	-11.2992	0.12393	-11.511
0.08624	-21.1499	0.507721	-9.31797	0.487938	-22.5362	0.328053	-21.9165		0.08846	-21.6998	0.0889002	-21.8012	0.0891577	-11.12	0.730584	-21.6308		0.46666	-21.4346	0.959022	-12.2936	0.956472	-12.1127	0.961109	-12.1139		0.83155	-21.3443	0.166077	-11.2917	0.16578	-11.3671	0.165241	-11.5536
0.12936	-21.149	0.566775	-9.37114	0.566708	-22.536	0.385369	-21.9167		0.13269	-21.6993	0.13335	-21.8005	0.133737	-11.1493	0.801561	-21.6328		0.51299	-21.4352	1	-12.2652	1	-12.0928	1	-12.091		0.87366	-21.3436	0.20639	-11.2963	0.20619	-11.3966	0.205814	-11.6129
0.17972	-21.1493	0.619216	-9.3289	0.645398	-22.5362	0.442684	-21.9173		0.18222	-21.7001	0.182718	-21.8	0.183007	-11.145	0.872539	-21.6336		0.55933	-21.4357	0	--	0	--	0	--		0.91577	-21.3445	0.246703	-11.2625	0.2466	-11.3596	0.246388	-11.5709
0.23009	-21.1495	0.671656	-9.20751	0.724089	-22.5365	0.5	-21.9179		0.23176	-21.6994	0.232086	-21.7992	0.232277	-11.135	0.936269	-21.6329		0.61076	-21.4351	0	-12.0386	0	-11.8536	0	-11.8639		0.95789	-21.3446	0.287015	-11.2955	0.28701	-11.3963	0.286962	-11.5929
0.28045	-21.1497	0.724096	-9.00924	0.791135	-22.5357	0.554676	-21.9177		0.28129	-21.6983	0.281454	-21.7981	0.281547	-11.094	1	-21.6322		0.6622	-21.4348	0.040978	-12.0311	0.0435284	-11.8357	0.0388911	-11.8635		1	-21.3442	0.327328	-11.4122	0.32742	-11.5267	0.327536	-11.735
0.33082	-21.1498	0.768944	-9.16433	0.85818	-22.5351	0.609351	-21.9191		0.33083	-21.6974	0.330822	-21.7971	0.330817	-11.0514	0	--		0.71363	-21.4361	0.081956	-12.014	0.0870568	-11.7874	0.0777823	-11.8677		0	--	0.373636	-11.2861	0.373728	-11.3712	0.373857	-11.5771
0.3787	-21.1503	0.813793	-9.15999	0.92909	-22.5358	0.664027	-21.9214		0.37852	-21.6986	0.378478	-21.7983	0.378452	-11.1165	0	-21.629		0.75419	-21.4358	0.122934	-12.003	0.130585	-11.7279	0.116673	-11.892		0	-21.344	0.419944	-11.3571	0.420035	-11.4486	0.420179	-11.6451
0.42658	-21.1508	0.858641	-9.00332	1	-22.536	0.718702	-21.924		0.42621	-21.7	0.426134	-21.7999	0.426087	-11.2006	0.0637306	-21.6325		0.79475	-21.4356	0.163912	-12.0258	0.174114	-11.6949	0.155565	-11.9576		0.04211	-21.344	0.466253	-11.2667	0.466343	-11.3517	0.4665	-11.5398
0.47447	-21.1512	0.905761	-9.19433	0	--	0.773378	-21.926		0.47391	-21.6991	0.47379	-21.8	0.473722	-11.1917	0.127461	-21.6318		0.8353	-21.4357	0.204886	-12.019	0.211924	-11.6967	0.198981	-11.9436		0.08423	-21.3439	0.512561	-11.1492	0.51265	-11.2266	0.512822	-11.4061
0.52235	-21.1512	0.95288	-9.3249	0	-22.5334	0.828053	-21.9271		0.5216	-21.6994	0.521446	-21.8012	0.521357	-11.0804	0.195238	-21.6323		0.87648	-21.4351	0.245861	-12.0025	0.249735	-11.7063	0.242397	-11.9058		0.12634	-21.3435	0.55887	-11.1375	0.558958	-11.222	0.559143	-11.4236
0.57023	-21.1507	1	-9.37114	0.0709098	-22.5341	0.885369	-21.9252		0.56929	-21.7004	0.569102	-21.8023	0.568992	-11.0786	0.263015	-21.6292		0.91765	-21.4344	0.286835	-11.988	0.287546	-11.736	0.285813	-11.8306		0.16845	-21.343	0.597421	-11.1399	0.597509	-11.2296	0.597706	-11.4365
0.62338	-21.1512	0	--	0.14182	-22.5351	0.942684	-21.9237		0.62223	-21.6993	0.622	-21.8011	0.621866	-11.0923	0.330792	-21.6267		0.95883	-21.4352	0.32781	-11.9953	0.325357	-11.8025	0.329229	-11.8208		0.22124	-21.3431	0.635973	-11.2298	0.63606	-11.3124	0.636269	-11.4977
0.67654	-21.1511	0	-9.36649	0.236109	-22.5359	1	-21.9197		0.67517	-21.6995	0.674899	-21.8003	0.674741	-11.2169	0.410782	-21.6304		1	-21.4357	0.366441	-11.9731	0.363794	-11.7528	0.368085	-11.7963		0.27403	-21.3437	0.674525	-11.2886	0.674611	-11.3759	0.674831	-11.5726
0.72969	-21.1507	0.0471196	-9.31983	0.330399	-22.5343	0	--		0.72811	-21.6995	0.727797	-21.7994	0.727616	-11.1988	0.490773	-21.6307		0	--	0.405072	-11.9741	0.402231	-11.7842	0.406941	-11.8015		0.32682	-21.3435	0.713076	-11.3623	0.713162	-11.4518	0.713394	-11.6651
0.77667	-21.1502	0.0942392	-9.18819	0.409169	-22.5353	0	-21.9196		0.77451	-21.7001	0.774081	-21.8	0.773832	-11.1876	0.570763	-21.629		0	-21.4355	0.443704	-11.9913	0.440668	-11.8031	0.445797	-11.818		0.37306	-21.344	0.753358	-11.2145	0.753515	-11.2878	0.753849	-11.4818
0.82366	-21.1496	0.141359	-9.00324	0.487938	-22.5344	0.0546755	-21.9177		0.82091	-21.7	0.820365	-21.8003	0.820048	-11.1457	0.650673	-21.6307		0.04117	-21.4351	0.482335	-12.0139	0.479105	-11.8274	0.484653	-11.8398		0.4193	-21.3443	0.793641	-11.2594	0.793867	-11.3496	0.794304	-11.5636
0.87064	-21.149	0.188659	-9.10925	0.566708	-22.5334	0.109351	-21.9155		0.86731	-21.6993	0.86665	-21.8005	0.866263	-11.1493	0.730584	-21.6304		0.08235	-21.4342	0.520967	-12.0318	0.517542	-11.8465	0.523509	-11.8572		0.46554	-21.3443	0.833923	-11.2917	0.83422	-11.3671	0.834759	-11.5536
0.91376	-21.1499	0.235958	-9.07112	0.645398	-22.5344	0.164027	-21.9133		0.91154	-21.6998	0.9111	-21.8012	0.910842	-11.12	0.801561	-21.6323		0.12352	-21.4333	0.559598	-12.0386	0.555979	-11.8536	0.562365	-11.8639		0.51178	-21.3441	0.875442	-11.2106	0.875665	-11.2992	0.87607	-11.511
0.95688	-21.1505	0.283258	-8.88571	0.724089	-22.5353	0.218702	-21.9114		0.95577	-21.7003	0.95555	-21.8021	0.955421	-11.0888	0.872539	-21.6318		0.1647	-21.4323	0.598191	-12.0318	0.594377	-11.8465	0.601182	-11.8572		0.55802	-21.344	0.916961	-11.1281	0.91711	-11.2122	0.91738	-11.4179
1	-21.1507	0.330558	-8.57933	0.791135	-22.5354	0.273378	-21.9165		1	-21.7004	1	-21.8023	1	-11.0786	0.936269	-21.6325		0.20544	-21.4326	0.636783	-12.0139	0.632776	-11.8274	0.64	-11.8398		0.60935	-21.3442	0.958481	-11.098	0.958555	-11.1799	0.95869	-11.3816
0	--	0.389612	-8.82316	0.85818	-22.5351	0.328053	-21.9165		0	--	0	--	0	--	1	-21.629		0.24617	-21.4327	0.675376	-11.9913	0.671174	-11.8032	0.678817	-11.818		0.66068	-21.3443	1	-11.1375	1	-11.222	1	-11.4236
0	-21.1507	0.448667	-8.87173	0.92909	-22.5341	0.385369	-21.9167		0	-21.7004	0	-21.8023	0	-11.0068	0	--		0.28691	-21.4326	0.713969	-11.9742	0.709573	-11.7842	0.717634	-11.8016		0.71201	-21.3441	0	--	0	--	0	--
0.04312	-21.1504	0.507721	-9.21295	1	-22.5334	0.442684	-21.9171		0.04423	-21.7002	0.0444501	-21.8021	0.0445789	-11.0497	0	-21.6286		0.32765	-21.4324	0.754675	-11.9851	0.748344	-11.733	0.759901	-11.8566		0.75185	-21.3438	0	-11.1369	0	-11.2218	0	-11.4236
0.08624	-21.1498	0.566775	-9.36649	0	--	0.5	-21.9143		0.08846	-21.6998	0.0889002	-21.8012	0.0891577	-11.0998	0.0637306	-21.6325		0.37398	-21.4327	0.795382	-12.0041	0.787115	-11.7045	0.802168	-11.9122		0.7917	-21.3435	0.0415193	-11.0698	0.0414449	-11.1561	0.0413101	-11.3595
0.12936	-21.149	0.619216	-9.24488	0	-22.5315	0.554676	-21.9177		0.13269	-21.6993	0.13335	-21.8005	0.133737	-11.1492	0.127461	-21.6317		0.42032	-21.4334	0.836088	-12.0258	0.825886	-11.6949	0.844435	-11.9576		0.83155	-21.343	0.0830387	-11.0671	0.0828899	-11.1342	0.0826203	-11.3145
0.17972	-21.1493	0.671656	-8.90818	0.0709098	-22.5308	0.609351	-21.917		0.18222	-21.7001	0.182718	-21.8	0.183007	-11.145	0.195238	-21.6322		0.46666	-21.4342	0.877066	-12.003	0.869415	-11.7279	0.883327	-11.892		0.87366	-21.3435	0.124558	-11.1814	0.124335	-11.2519	0.12393	-11.4355
0.23009	-21.1495	0.724096	-8.86123	0.14182	-22.5298	0.664027	-21.9136		0.23176	-21.6993	0.232086	-21.7992	0.232277	-11.135	0.263015	-21.6291		0.51299	-21.435	0.918044	-12.014	0.912943	-11.7874	0.922218	-11.8677		0.91577	-21.3439	0.166077	-11.2865	0.16578	-11.3642	0.165241	-11.5444
0.28045	-21.1497	0.768944	-9.00094	0.236109	-22.5312	0.718702	-21.9107		0.28129	-21.6983	0.281454	-21.7981	0.281547	-11.094	0.330792	-21.6267		0.55933	-21.4355	0.959022	-12.0311	0.956472	-11.8357	0.961109	-11.8635		0.95789	-21.344	0.20639	-11.1867	0.20619	-11.2522	0.205814	-11.4288
0.33082	-21.1498	0.813793	-9.0454	0.330399	-22.534	0.773378	-21.9084		0.33083	-21.6974	0.330822	-21.7971	0.330817	-11.0514	0.410782	-21.6282		0.61076	-21.4349	1	-12.0386	1	-11.8536	1	-11.8639		1	-21.344	0.246703	-11.1737	0.2466	-11.2457	0.246388	-11.4336
0.3787	-21.1502	0.858641	-9.00324	0.409169	-22.5327	0.828053	-21.9067		0.37852	-21.6986	0.378478	-21.7983	0.378452	-11.1093	0.490773	-21.6297		0.6622	-21.434	0	--	0	--	0	--		0	--	0.287015	-11.2288	0.28701	-11.3043	0.286962	-11.5088
0.42658	-21.1503	0.905761	-9.18819	0.487938	-22.5317	0.885369	-21.9102		0.42621	-21.7	0.426134	-21.7999	0.426087	-11.1846	0.570763	-21.6286		0.71363	-21.4331	0	-8.22729	0	-9.05905	0	-8.62381		0	-21.3435	0.327328	-11.1812	0.32742	-11.2532	0.327536	-11.4445
0.47447	-21.1503	0.95288	-9.31983	0.566708	-22.5315	0.942684	-21.9146		0.47391	-21.699	0.47379	-21.7998	0.473722	-11.0741	0.650673	-21.6297		0.75419	-21.4333	0.040978	-8.49951	0.0435284	-9.01974	0.0388911	-8.72151		0.04211	-21.3434	0.373636	-11.2414	0.373728	-11.33	0.373857	-11.5254
0.52235	-21.1502	1	-9.36649	0.645398	-22.5317	1	-21.9196		0.5216	-21.6992	0.521446	-21.8011	0.521357	-11.0775	0.730584	-21.6282		0.79475	-21.4329	0.081956	-8.61553	0.0870568	-8.90244	0.0777823	-8.79235		0.08423	-21.3438	0.419944	-11.2514	0.420035	-11.321	0.420179	-11.5037
0.57023	-21.1507	0	--	0.724089	-22.5327	0	--		0.56929	-21.7004	0.569102	-21.8023	0.568992	-11.0068	0.801561	-21.6317		0.8353	-21.4323	0.122934	-8.54821	0.130585	-8.70999	0.116673	-8.71609		0.12634	-21.3434	0.466253	-11.1761	0.466343	-11.2565	0.4665	-11.4462
0.62338	-21.1502	0	-8.54871	0.791135	-22.5306	0	-21.9026		0.62223	-21.6991	0.622	-21.8009	0.621866	-11.0889	0.872539	-21.6317		0.87648	-21.4333	0.163912	-8.30118	0.174114	-8.44882	0.155565	-8.4733		0.16845	-21.3429	0.512561	-11.1087	0.51265	-11.1957	0.512822	-11.4006
0.67654	-21.1503	0.0471196	-8.61782	0.85818	-22.5298	0.0546755	-21.9028		0.67517	-21.6993	0.674899	-21.8001	0.674741	-11.0902	0.936269	-21.6325		0.91765	-21.4342	0.204886	-8.28321	0.211924	-8.46193	0.198981	-8.44211		0.22124	-21.343	0.55887	-11.1369	0.558958	-11.2218	0.559143	-11.4236
0.72969	-21.1502	0.0942392	-8.79168	0.92909	-22.5308	0.109351	-21.9044		0.72811	-21.6995	0.727797	-21.7993	0.727616	-11.1714	1	-21.6286		0.95883	-21.4351	0.245861	-8.23473	0.249735	-8.45057	0.242397	-8.35168		0.27403	-21.3436	0.597421	-11.1276	0.597509	-11.2037	0.597706	-11.3821
0.77667	-21.1498	0.141359	-8.99573	1	-22.5315	0.164027	-21.9073		0.77451	-21.7001	0.774081	-21.8	0.773832	-11.1332	0	--		1	-21.4355	0.286835	-8.17389	0.287546	-8.35919	0.285813	-8.21357		0.32682	-21.3435	0.635973	-11.1073	0.63606	-11.1835	0.636269	-11.3689
0.82366	-21.1493	0.188659	-8.7605	0	--	0.218702	-21.9113		0.82091	-21.6999	0.820365	-21.8003	0.820048	-11.1081	0	-21.6286		0	--	0.32781	-8.12949	0.325357	-8.19936	0.329229	-8.05529		0.37306	-21.3435	0.674525	-11.2809	0.674611	-11.3501	0.674831	-11.5305
0.87064	-21.149	0.235958	-8.41734	0	-22.5293	0.273378	-21.9099		0.86731	-21.6993	0.86665	-21.8005	0.866263	-11.1492	0.0637306	-21.6291		0	-21.4343	0.366441	-8.21152	0.363794	-8.49293	0.368085	-8.27002		0.4193	-21.3439	0.713076	-11.2349	0.713162	-11.3051	0.713394	-11.4898
0.91376	-21.1498	0.283258	-8.19245	0.0709098	-22.5292	0.328053	-21.9094		0.91154	-21.6998	0.9111	-21.8012	0.910842	-11.0998	0.127461	-21.6314		0.04117	-21.4344	0.405072	-8.36846	0.402231	-8.7623	0.406941	-8.49108		0.46554	-21.3437	0.753358	-11.2056	0.753515	-11.2802	0.753849	-11.4753
0.95688	-21.1504	0.330558	-8.57863	0.14182	-22.5298	0.385369	-21.91		0.95577	-21.7002	0.95555	-21.8021	0.955421	-11.0497	0.195238	-21.629		0.08235	-21.4342	0.443704	-8.48063	0.440668	-8.9451	0.445797	-8.63779		0.51178	-21.3435	0.793641	-11.2334	0.793867	-11.3041	0.794304	-11.4817
1	-21.1507	0.389612	-8.20734	0.236109	-22.531	0.442684	-21.9117		1	-21.7004	1	-21.8023	1	-11.0068	0.263015	-21.6265		0.12352	-21.4332	0.482335	-8.49743	0.479105	-9.03643	0.484653	-8.69017		0.55802	-21.3435	0.833923	-11.2865	0.83422	-11.3642	0.834759	-11.5444
0	--	0.448667	-8.79696	0.330399	-22.534	0.5	-21.9142		0	--	0	--	0	--	0.330792	-21.6266		0.1647	-21.4323	0.520967	-8.40987	0.517542	-9.06019	0.523509	-8.66254		0.60935	-21.3435	0.875442	-11.1814	0.875665	-11.2519	0.87607	-11.4355
0	-21.1502	0.507721	-8.75467	0.409169	-22.5313	0.554676	-21.9104		0	-21.6992	0	-21.7991	0	-11.0067	0.410782	-21.6268		0.20544	-21.4326	0.559598	-8.22729	0.555979	-9.05905	0.562365	-8.62381		0.66068	-21.3437	0.916961	-11.0671	0.91711	-11.1342	0.91738	-11.3145
0.04312	-21.1501	0.566775	-8.54871	0.487938	-22.5293	0.609351	-21.9075		0.04423	-21.6994	0.0444501	-21.7992	0.0445789	-11.0486	0.490773	-21.6294		0.24617	-21.4327	0.598191	-8.40973	0.594377	-9.06019	0.601182	-8.66249		0.71201	-21.344	0.958481	-11.0698	0.958555	-11.1561	0.95869	-11.3595
0.08624	-21.1497	0.619216	-8.73432	0.566708	-22.5293	0.664027	-21.9058		0.08846	-21.6997	0.0889002	-21.7996	0.0891577	-11.0987	0.570763	-21.6286		0.28691	-21.4326	0.636783	-8.49735	0.632776	-9.03654	0.64	-8.69019		0.75185	-21.3436	1	-11.1369	1	-11.2218	1	-11.4236
0.12936	-21.1489	0.671656	-8.85763	0.645398	-22.5293	0.718702	-21.9052		0.13269	-21.6992	0.13335	-21.8005	0.133737	-11.1482	0.650673	-21.6294		0.32765	-21.4324	0.675376	-8.48083	0.671174	-8.9455	0.678817	-8.63808		0.7917	-21.3431	0	--	0	--	0	--
0.17972	-21.1491	0.724096	-8.42014	0.724089	-22.5313	0.773378	-21.9055		0.18222	-21.7001	0.182718	-21.7999	0.183007	-11.0622	0.730584	-21.6268		0.37398	-21.4325	0.713969	-8.36905	0.709573	-8.76323	0.717634	-8.49185		0.83155	-21.3429	0	-11.0171	0	-11.0876	0	-11.2601
0.23009	-21.1493	0.768944	-8.6742	0.791135	-22.5301	0.828053	-21.9066		0.23176	-21.6993	0.232086	-21.7991	0.232277	-11.108	0.801561	-21.6295		0.42032	-21.433	0.754675	-8.43864	0.748344	-8.7167	0.759901	-8.58199		0.87366	-21.3434	0.0415193	-11.007	0.0414449	-11.0771	0.0413101	-11.2495
0.28045	-21.1496	0.813793	-8.87107	0.85818	-22.5298	0.885369	-21.9041		0.28129	-21.6983	0.281454	-21.7981	0.281547	-11.0526	0.872539	-21.6314		0.46666	-21.4339	0.795382	-8.41185	0.787115	-8.5892	0.802168	-8.57291		0.91577	-21.3438	0.0830387	-11.0609	0.0828899	-11.131	0.0826203	-11.3053
0.33082	-21.1498	0.858641	-8.99573	0.92909	-22.5292	0.942684	-21.9028		0.33083	-21.6974	0.330822	-21.7971	0.330817	-11.0514	0.936269	-21.6291		0.51299	-21.4342	0.836088	-8.30118	0.825886	-8.44882	0.844435	-8.4733		0.95789	-21.3434	0.124558	-11.1742	0.124335	-11.2486	0.12393	-11.426
0.3787	-21.1492	0.905761	-8.79168	1	-22.5293	1	-21.9026		0.37852	-21.6977	0.378478	-21.7975	0.378452	-11.0609	1	-21.6286		0.55933	-21.4343	0.877066	-8.54821	0.869415	-8.70999	0.883327	-8.71609		1	-21.3435	0.166077	-11.2835	0.16578	-11.3638	0.165241	-11.5439
0.42658	-21.1484	0.95288	-8.61782	0	--	0	--		0.42621	-21.6982	0.426134	-21.7981	0.426087	-11.0685	0	--		0.61076	-21.4342	0.918044	-8.61553	0.912943	-8.90244	0.922218	-8.79235		0	--	0.20639	-11.1812	0.20619	-11.2518	0.205814	-11.4283
0.47447	-21.1486	1	-8.54871	0	-22.5285	0	-21.9013		0.47391	-21.6987	0.47379	-21.7997	0.473722	-11.0681	0	-21.6282		0.6622	-21.4336	0.959022	-8.49951	0.956472	-9.01974	0.961109	-8.72151		0	-21.3434	0.246703	-11.154	0.2466	-11.2447	0.246388	-11.4328
0.52235	-21.1498	0	--	0.0709098	-22.529	0.0546755	-21.901		0.5216	-21.6991	0.521446	-21.799	0.521357	-11.0764	0.0637306	-21.6288		0.71363	-21.4328	1	-8.22729	1	-9.05905	1	-8.62381		0.04211	-21.3431	0.287015	-11.2136	0.28701	-11.3042	0.286962	-11.5086
0.57023	-21.1502	0	-8.53758	0.14182	-22.5286	0.109351	-21.9		0.56929	-21.6992	0.569102	-21.7991	0.568992	-11.0067	0.127461	-21.6313		0.75419	-21.4327	0	--	0	--	0	--		0.08423	-21.3428	0.327328	-11.1721	0.32742	-11.2531	0.327536	-11.4438
0.62338	-21.1497	0.0471196	-8.60728	0.236109	-22.5274	0.164027	-21.9019		0.62223	-21.699	0.622	-21.7989	0.621866	-11.0772	0.195238	-21.6289		0.79475	-21.4323	0	-8.22582	0	-8.26835	0	-8.2241		0.12634	-21.3433	0.373636	-11.206	0.373728	-11.2783	0.373857	-11.4675
0.67654	-21.1483	0.0942392	-8.78254	0.330399	-22.5247	0.218702	-21.9036		0.67517	-21.6986	0.674899	-21.7993	0.674741	-11.073	0.263015	-21.6264		0.8353	-21.4323	0.040978	-8.19586	0.0435284	-8.22808	0.0388911	-8.01722		0.16845	-21.3427	0.419944	-11.1026	0.420035	-11.1837	0.420179	-11.383
0.72969	-21.1486	0.141359	-8.99568	0.409169	-22.527	0.273378	-21.9048		0.72811	-21.6981	0.727797	-21.7978	0.727616	-11.0662	0.330792	-21.6266		0.87648	-21.4332	0.081956	-8.10671	0.0870568	-8.25688	0.0777823	-7.76205		0.22124	-21.3428	0.466253	-11.0846	0.466343	-11.1653	0.4665	-11.3657
0.77667	-21.1487	0.188659	-8.75895	0.487938	-22.5287	0.328053	-21.9052		0.77451	-21.6991	0.774081	-21.7989	0.773832	-11.1077	0.410782	-21.6267		0.91765	-21.4342	0.122934	-7.96174	0.130585	-8.15779	0.116673	-8.07002		0.27403	-21.343	0.512561	-11.0909	0.51265	-11.1752	0.512822	-11.376
0.82366	-21.1488	0.235958	-8.41566	0.566708	-22.5285	0.385369	-21.905		0.82091	-21.6999	0.820365	-21.7998	0.820048	-11.0791	0.490773	-21.6274		0.95883	-21.4344	0.163912	-8.30051	0.174114	-8.44834	0.155565	-8.46556		0.32682	-21.3434	0.55887	-11.0171	0.558958	-11.0876	0.559143	-11.2601
0.87064	-21.1489	0.283258	-8.19156	0.645398	-22.5287	0.442684	-21.9044		0.86731	-21.6992	0.86665	-21.8005	0.866263	-11.1482	0.570763	-21.6282		1	-21.4343	0.204886	-8.28254	0.211924	-8.46072	0.198981	-8.43436		0.37306	-21.3431	0.597421	-11.0968	0.597509	-11.1807	0.597706	-11.3809
0.91376	-21.1497	0.330558	-8.57835	0.724089	-22.527	0.5	-21.9036		0.91154	-21.6997	0.9111	-21.7996	0.910842	-11.0987	0.650673	-21.6274		0	--	0.245861	-8.23402	0.249735	-8.44915	0.242397	-8.34391		0.4193	-21.3434	0.635973	-11.084	0.63606	-11.165	0.636269	-11.3652
0.95688	-21.1501	0.389612	-8.17217	0.791135	-22.5283	0.554676	-21.9031		0.95577	-21.6994	0.95555	-21.7992	0.955421	-11.0486	0.730584	-21.6267		0	-21.4342	0.286835	-8.17308	0.287546	-8.35811	0.285813	-8.20582		0.46554	-21.3431	0.674525	-11.091	0.674611	-11.1716	0.674831	-11.3718
1	-21.1502	0.448667	-8.04289	0.85818	-22.5286	0.609351	-21.9021		1	-21.6992	1	-21.7991	1	-11.0067	0.801561	-21.6283		0.04117	-21.434	0.32781	-8.12945	0.325357	-8.19896	0.329229	-8.05503		0.51178	-21.3434	0.713076	-11.1174	0.713162	-11.2034	0.713394	-11.394
0	--	0.507721	-8.29704	0.92909	-22.529	0.664027	-21.901		0	--	0	--	0	--	0.872539	-21.6313		0.08235	-21.4339	0.366441	-8.21059	0.363794	-8.15667	0.368085	-8.02324		0.55802	-21.3434	0.753358	-11.1869	0.753515	-11.2741	0.753849	-11.4583
0	-21.1467	0.566775	-8.53758	1	-22.5285	0.718702	-21.8995		0	-21.6992	0	-21.799	0	-11.0057	0.936269	-21.6288		0.12352	-21.4329	0.405072	-8.367	0.402231	-8.07057	0.406941	-8.06307		0.60935	-21.3433	0.793641	-11.1504	0.793867	-11.2179	0.794304	-11.394
0.04312	-21.147	0.619216	-8.32521	0	--	0.773378	-21.8978		0.04423	-21.6993	0.0444501	-21.7991	0.0445789	-10.9803	1	-21.6282		0.1647	-21.4322	0.443704	-8.47893	0.440668	-8.15419	0.445797	-8.15609		0.66068	-21.343	0.833923	-11.2835	0.83422	-11.3638	0.834759	-11.5439
0.08624	-21.1481	0.671656	-8.10021	0	-22.528	0.828053	-21.8966		0.08846	-21.6997	0.0889002	-21.7995	0.0891577	-11.0495	0	--		0.20544	-21.4319	0.482335	-8.49567	0.479105	-8.14299	0.484653	-8.16074		0.71201	-21.3434	0.875442	-11.1742	0.875665	-11.2486	0.87607	-11.426
0.12936	-21.1489	0.724096	-8.02329	0.0709098	-22.5276	0.885369	-21.899		0.13269	-21.6992	0.13335	-21.8005	0.133737	-11.1481	0	-21.626		0.24617	-21.4319	0.520967	-8.40815	0.517542	-8.18513	0.523509	-8.10487		0.75185	-21.3431	0.916961	-11.0609	0.91711	-11.131	0.91738	-11.3053
0.17972	-21.1491	0.768944	-8.32733	0.14182	-22.5286	0.942684	-21.9009		0.18222	-21.7001	0.182718	-21.7999	0.183007	-11.0622	0.0637306	-21.6243		0.28691	-21.4321	0.559598	-8.22582	0.555979	-8.26835	0.562365	-8.2241		0.7917	-21.343	0.958481	-11.007	0.958555	-11.0771	0.95869	-11.2495
0.23009	-21.1493	0.813793	-8.71214	0.236109	-22.5274	1	-21.9013		0.23176	-21.6993	0.232086	-21.7991	0.232277	-11.108	0.127461	-21.6213		0.32765	-21.4324	0.598191	-8.40802	0.594377	-8.18529	0.601182	-8.10508		0.83155	-21.3427	1	-11.0171	1	-11.0876	1	-11.2601
0.28045	-21.1496	0.858641	-8.99568	0.330399	-22.5247	0	--		0.28129	-21.6983	0.281454	-21.7981	0.281547	-11.0525	0.195238	-21.6211		0.37398	-21.4323	0.636783	-8.4956	0.632776	-8.14285	0.64	-8.16064		0.87366	-21.3433	0	--	0	--	0	--
0.33082	-21.1498	0.905761	-8.78254	0.409169	-22.526	0	-21.898		0.33083	-21.6974	0.330822	-21.7971	0.330817	-11.0513	0.263015	-21.6197		0.42032	-21.4326	0.675376	-8.47913	0.671174	-8.15433	0.678817	-8.15626		0.91577	-21.3428	0	-11.0157	0	-11.0852	0	-11.2535
0.3787	-21.1491	0.95288	-8.60728	0.487938	-22.5273	0.0546755	-21.8986		0.37852	-21.6977	0.378478	-21.7975	0.378452	-11.0408	0.330792	-21.616		0.46666	-21.4336	0.713969	-8.36759	0.709573	-8.07097	0.717634	-8.06353		0.95789	-21.3431	0.0415193	-11.0052	0.0414449	-11.0747	0.0413101	-11.2429
0.42658	-21.1483	1	-8.53758	0.566708	-22.528	0.109351	-21.9		0.42621	-21.6982	0.426134	-21.798	0.426087	-11.03	0.410782	-21.6211		0.51299	-21.4341	0.754675	-8.27709	0.748344	-8.14299	0.759901	-8.0615		1	-21.3434	0.0830387	-10.9785	0.0828899	-11.0474	0.0826203	-11.2195
0.47447	-21.1475	0	--	0.645398	-22.5273	0.164027	-21.9019		0.47391	-21.6987	0.47379	-21.7996	0.473722	-11.0552	0.490773	-21.625		0.55933	-21.4342	0.795382	-8.13574	0.787115	-8.31774	0.802168	-8.28714		0	--	0.124558	-10.9366	0.124335	-11.0035	0.12393	-11.1753
0.52235	-21.1469	0	-7.06649	0.724089	-22.526	0.218702	-21.9036		0.5216	-21.699	0.521446	-21.7988	0.521357	-11.0119	0.570763	-21.626		0.61076	-21.4341	0.836088	-8.30051	0.825886	-8.44834	0.844435	-8.46556		0	-21.3424	0.166077	-10.8973	0.16578	-10.9548	0.165241	-11.1265
0.57023	-21.1467	0.0471196	-7.15844	0.791135	-22.5277	0.273378	-21.9048		0.56929	-21.6992	0.569102	-21.799	0.568992	-11.0057	0.650673	-21.625		0.6622	-21.4335	0.877066	-7.96174	0.869415	-8.15779	0.883327	-8.07002		0.04211	-21.3423	0.20639	-11.0281	0.20619	-11.0936	0.205814	-11.2718
0.62338	-21.1469	0.0942392	-7.26743	0.85818	-22.5286	0.328053	-21.9052		0.62223	-21.699	0.622	-21.7988	0.621866	-11.0127	0.730584	-21.6211		0.71363	-21.4322	0.918044	-8.10671	0.912943	-8.25688	0.922218	-7.76205		0.08423	-21.3424	0.246703	-11.1367	0.2466	-11.1982	0.246388	-11.3756
0.67654	-21.1477	0.141359	-7.29361	0.92909	-22.5276	0.385369	-21.9049		0.67517	-21.6986	0.674899	-21.7992	0.674741	-11.0435	0.801561	-21.6221		0.75419	-21.4323	0.959022	-8.19586	0.956472	-8.22808	0.961109	-8.01722		0.12634	-21.343	0.287015	-11.1387	0.28701	-11.2019	0.286962	-11.3868
0.72969	-21.1486	0.188659	-7.4373	1	-22.528	0.442684	-21.9043		0.72811	-21.698	0.727797	-21.7978	0.727616	-11.0336	0.872539	-21.6213		0.79475	-21.4323	1	-8.22582	1	-8.26835	1	-8.2241		0.16845	-21.3426	0.327328	-11.1648	0.32742	-11.2379	0.327536	-11.4365
0.77667	-21.1487	0.235958	-7.78211	0	--	0.5	-21.9035		0.77451	-21.6991	0.774081	-21.7989	0.773832	-11.045	0.936269	-21.6243		0.8353	-21.4322	0	--	0	--	0	--		0.22124	-21.3427	0.373636	-11.1342	0.373728	-11.2131	0.373857	-11.4115
0.82366	-21.1488	0.283258	-7.99447	0	-22.5269	0.554676	-21.9031		0.82091	-21.6998	0.820365	-21.7998	0.820048	-11.06	1	-21.626		0.87648	-21.4329	0	-8.22514	0	-7.77853	0	-7.85535		0.27403	-21.3429	0.419944	-11.0611	0.420035	-11.139	0.420179	-11.3258
0.87064	-21.1489	0.330558	-7.51303	0.0709098	-22.5269	0.609351	-21.9021		0.86731	-21.6992	0.86665	-21.8005	0.866263	-11.1481	0	--		0.91765	-21.4339	0.040978	-8.19343	0.0435284	-8.11638	0.0388911	-7.83182		0.32682	-21.3434	0.466253	-10.9482	0.466343	-11.0112	0.4665	-11.1979
0.91376	-21.1481	0.389612	-8.17132	0.14182	-22.5245	0.664027	-21.9009		0.91154	-21.6997	0.9111	-21.7995	0.910842	-11.0495	0	-21.6256		0.95883	-21.434	0.081956	-8.10428	0.0870568	-8.10759	0.0777823	-7.74624		0.37306	-21.3427	0.512561	-10.9928	0.51265	-11.0609	0.512822	-11.239
0.95688	-21.147	0.448667	-7.72016	0.236109	-22.5243	0.718702	-21.8995		0.95577	-21.6993	0.95555	-21.7991	0.955421	-10.9803	0.0637306	-21.624		1	-21.4342	0.122934	-7.95921	0.130585	-8.13244	0.116673	-7.64951		0.4193	-21.3427	0.55887	-11.0157	0.558958	-11.0852	0.559143	-11.2535
1	-21.1467	0.507721	-7.28769	0.330399	-22.5243	0.773378	-21.8978		1	-21.6992	1	-21.799	1	-11.0057	0.127461	-21.6212		0	--	0.163912	-7.76818	0.174114	-7.84556	0.155565	-7.50999		0.46554	-21.3428	0.597421	-10.9696	0.597509	-11.0359	0.597706	-11.2122
0	--	0.566775	-7.06649	0.409169	-22.5256	0.828053	-21.8965		0	--	0	--	0	--	0.195238	-21.6209		0	-21.4339	0.204886	-7.97706	0.211924	-7.85816	0.198981	-7.71388		0.51178	-21.3423	0.635973	-10.9841	0.63606	-11.0649	0.636269	-11.2626
0	-21.1466	0.619216	-7.24664	0.487938	-22.5267	0.885369	-21.8971		0	-21.6972	0	-21.7968	0	-11.0055	0.263015	-21.6196		0.04117	-21.4335	0.245861	-8.08361	0.249735	-7.90846	0.242397	-7.83472		0.55802	-21.3424	0.674525	-10.9851	0.674611	-11.059	0.674831	-11.2409
0.04312	-21.147	0.671656	-7.61786	0.566708	-22.5269	0.942684	-21.8977		0.04423	-21.6976	0.0444501	-21.7982	0.0445789	-10.9768	0.330792	-21.6159		0.08235	-21.4326	0.286835	-8.11353	0.287546	-8.02278	0.285813	-7.92342		0.60935	-21.3423	0.713076	-11.1119	0.713162	-11.1878	0.713394	-11.3862
0.08624	-21.1479	0.724096	-8.00974	0.645398	-22.5267	1	-21.898		0.08846	-21.6984	0.0889002	-21.7995	0.0891577	-10.9631	0.410782	-21.6194		0.12352	-21.4318	0.32781	-8.12844	0.325357	-8.1908	0.329229	-8.04775		0.66068	-21.3429	0.753358	-11.0605	0.753515	-11.13	0.753849	-11.3132
0.12936	-21.1489	0.768944	-7.68624	0.724089	-22.5256	0	--		0.13269	-21.699	0.13335	-21.8003	0.133737	-10.9589	0.490773	-21.6235		0.1647	-21.4322	0.366441	-8.10248	0.363794	-8.10869	0.368085	-7.97818		0.71201	-21.3426	0.793641	-11.0355	0.793867	-11.1078	0.794304	-11.2855
0.17972	-21.1483	0.813793	-7.40962	0.791135	-22.5253	0	-21.898		0.18222	-21.698	0.182718	-21.7993	0.183007	-11.0604	0.570763	-21.6256		0.20544	-21.4319	0.405072	-7.95174	0.402231	-7.99306	0.406941	-7.87236		0.75185	-21.343	0.833923	-10.8973	0.83422	-10.9548	0.834759	-11.1265
0.23009	-21.1473	0.858641	-7.29361	0.85818	-22.5245	0.0546755	-21.8986		0.23176	-21.697	0.232086	-21.7978	0.232277	-11.0211	0.650673	-21.6235		0.24617	-21.4319	0.443704	-7.69382	0.440668	-7.72132	0.445797	-7.61332		0.7917	-21.3427	0.875442	-10.9366	0.875665	-11.0035	0.87607	-11.1753
0.28045	-21.1461	0.905761	-7.26743	0.92909	-22.5269	0.109351	-21.8991		0.28129	-21.6968	0.281454	-21.7968	0.281547	-11.0218	0.730584	-21.6194		0.28691	-21.4321	0.482335	-7.6322	0.479105	-7.96179	0.484653	-7.83642		0.83155	-21.3426	0.916961	-10.9785	0.91711	-11.0474	0.91738	-11.2195
0.33082	-21.1449	0.95288	-7.15844	1	-22.5269	0.164027	-21.8975		0.33083	-21.6974	0.330822	-21.7971	0.330817	-10.9886	0.801561	-21.6211		0.32765	-21.4324	0.520967	-7.9611	0.517542	-8.01182	0.523509	-8.05492		0.87366	-21.343	0.958481	-11.0052	0.958555	-11.0747	0.95869	-11.2429
0.3787	-21.1459	1	-7.06649	0	--	0.218702	-21.8991		0.37852	-21.6972	0.378478	-21.7969	0.378452	-11.0156	0.872539	-21.6212		0.37398	-21.4318	0.559598	-8.22514	0.555979	-7.77853	0.562365	-7.85535		0.91577	-21.3424	1	-11.0157	1	-11.0852	1	-11.2535
0.42658	-21.1472	0	--	0	-22.5265	0.273378	-21.901		0.42621	-21.6971	0.426134	-21.798	0.426087	-11.0163	0.936269	-21.624		0.42032	-21.4318	0.598191	-7.9614	0.594377	-8.01164	0.601182	-8.05476		0.95789	-21.3423	0	--	0	--	0	--
0.47447	-21.1475	0	-6.88387	0.0709098	-22.5259	0.328053	-21.902		0.47391	-21.6981	0.47379	-21.7986	0.473722	-11.02	1	-21.6256		0.46666	-21.4323	0.636783	-7.63291	0.632776	-7.96235	0.64	-7.83705		1	-21.3424	0	-10.9042	0	-10.9629	0	-11.131
0.52235	-21.1467	0.0471196	-7.07854	0.14182	-22.5245	0.385369	-21.9022		0.5216	-21.6978	0.521446	-21.7984	0.521357	-11.0033	0	--		0.51299	-21.4334	0.675376	-7.69291	0.671174	-7.72038	0.678817	-7.61239		0	--	0.0415193	-10.965	0.0414449	-11.0289	0.0413101	-11.2053
0.57023	-21.1466	0.0942392	-7.22789	0.236109	-22.5243	0.442684	-21.9027		0.56929	-21.6972	0.569102	-21.7968	0.568992	-11.0055	0	-21.6256		0.55933	-21.4339	0.713969	-7.95091	0.709573	-7.99217	0.717634	-7.87153		0	-21.3421	0.0830387	-10.9774	0.0828899	-11.0449	0.0826203	-11.2128
0.62338	-21.1468	0.141359	-7.2935	0.330399	-22.5243	0.5	-21.9035		0.62223	-21.6979	0.622	-21.7986	0.621866	-11.0068	0.0637306	-21.6232		0.61076	-21.4333	0.754675	-7.98114	0.748344	-8.08488	0.759901	-7.98652		0.04211	-21.3423	0.124558	-10.9348	0.124335	-11.0009	0.12393	-11.1685
0.67654	-21.1477	0.188659	-7.43683	0.409169	-22.5244	0.554676	-21.903		0.67517	-21.6978	0.674899	-21.7985	0.674741	-11.0221	0.127461	-21.621		0.6622	-21.4321	0.795382	-8.06428	0.787115	-8.00109	0.802168	-7.78313		0.08423	-21.3418	0.166077	-10.8914	0.16578	-10.9536	0.165241	-11.1251
0.72969	-21.1468	0.235958	-7.78137	0.487938	-22.526	0.609351	-21.9015		0.72811	-21.6971	0.727797	-21.7976	0.727616	-11.0118	0.195238	-21.6204		0.71363	-21.432	0.836088	-7.76818	0.825886	-7.84556	0.844435	-7.50999		0.12634	-21.3419	0.20639	-11.0112	0.20619	-11.0927	0.205814	-11.2709
0.77667	-21.1479	0.283258	-7.99268	0.566708	-22.5265	0.664027	-21.8995		0.77451	-21.6974	0.774081	-21.7987	0.773832	-11.0333	0.263015	-21.6185		0.75419	-21.432	0.877066	-7.95921	0.869415	-8.13244	0.883327	-7.64951		0.16845	-21.3425	0.246703	-11.1271	0.2466	-11.1979	0.246388	-11.3752
0.82366	-21.1486	0.330558	-7.51282	0.645398	-22.526	0.718702	-21.8976		0.82091	-21.6983	0.820365	-21.7997	0.820048	-11.0549	0.330792	-21.6158		0.79475	-21.4322	0.918044	-8.10428	0.912943	-8.10759	0.922218	-7.74624		0.22124	-21.3426	0.287015	-11.1262	0.28701	-11.2017	0.286962	-11.3866
0.87064	-21.1489	0.389612	-7.78281	0.724089	-22.5244	0.773378	-21.8971		0.86731	-21.699	0.86665	-21.8003	0.866263	-10.9589	0.410782	-21.6192		0.8353	-21.4322	0.959022	-8.19343	0.956472	-8.11638	0.961109	-7.83182		0.27403	-21.3423	0.327328	-11.1591	0.32742	-11.2377	0.327536	-11.4359
0.91376	-21.1479	0.448667	-7.67267	0.791135	-22.5247	0.828053	-21.8965		0.91154	-21.6984	0.9111	-21.7995	0.910842	-10.9631	0.490773	-21.6234		0.87648	-21.4318	1	-8.22514	1	-7.77853	1	-7.85535		0.32682	-21.3418	0.373636	-11.0678	0.373728	-11.1365	0.373857	-11.3209
0.95688	-21.147	0.507721	-7.18374	0.85818	-22.5245	0.885369	-21.8971		0.95577	-21.6976	0.95555	-21.7982	0.955421	-10.9768	0.570763	-21.6256		0.91765	-21.4326	0	--	0	--	0	--		0.37306	-21.3423	0.419944	-10.9945	0.420035	-11.0587	0.420179	-11.2353
1	-21.1466	0.566775	-6.88387	0.92909	-22.5259	0.942684	-21.8977		1	-21.6972	1	-21.7968	1	-11.0055	0.650673	-21.6234		0.95883	-21.4335	0	-8.22338	0	-7.7724	0	-7.84005		0.4193	-21.342	0.466253	-10.9279	0.466343	-11.0033	0.4665	-11.183
0	--	0.619216	-7.13588	1	-22.5265	1	-21.898		0	--	0	--	0	--	0.730584	-21.6192		1	-21.4339	0.040978	-7.8288	0.0435284	-7.53561	0.0388911	-7.81639		0.46554	-21.3421	0.512561	-10.9176	0.51265	-10.9797	0.512822	-11.1502
0	-21.1458	0.671656	-7.55777	0	--	0	--		0	-21.6972	0	-21.7968	0	-10.9707	0.801561	-21.6209		0	--	0.081956	-7.46685	0.0870568	-7.80094	0.0777823	-7.61288		0.51178	-21.3423	0.55887	-10.9042	0.558958	-10.9629	0.559143	-11.131
0.04312	-21.147	0.724096	-7.87113	0	-22.5248	0	-21.897		0.04423	-21.6975	0.0444501	-21.7981	0.0445789	-10.9757	0.872539	-21.621		0	-21.4316	0.122934	-7.91606	0.130585	-7.90904	0.116673	-7.63304		0.55802	-21.3421	0.597421	-10.9137	0.597509	-10.9756	0.597706	-11.1457
0.08624	-21.1478	0.768944	-7.66669	0.0709098	-22.524	0.0546755	-21.8969		0.08846	-21.6983	0.0889002	-21.7995	0.0891577	-10.962	0.936269	-21.6232		0.04117	-21.4315	0.163912	-7.7681	0.174114	-7.84534	0.155565	-7.49462		0.60935	-21.3423	0.635973	-10.9363	0.63606	-10.9986	0.636269	-11.1706
0.12936	-21.1489	0.813793	-7.39685	0.14182	-22.5243	0.109351	-21.8968		0.13269	-21.699	0.13335	-21.8003	0.133737	-10.9589	1	-21.6256		0.08235	-21.431	0.204886	-7.97528	0.211924	-7.85781	0.198981	-7.71107		0.66068	-21.342	0.674525	-10.9681	0.674611	-11.0312	0.674831	-11.2054
0.17972	-21.1482	0.858641	-7.2935	0.236109	-22.5237	0.164027	-21.8975		0.18222	-21.698	0.182718	-21.7993	0.183007	-11.0603	0	--		0.12352	-21.4316	0.245861	-8.08198	0.249735	-7.908	0.242397	-7.82997		0.71201	-21.3422	0.713076	-11.0155	0.713162	-11.0808	0.713394	-11.2595
0.23009	-21.1473	0.905761	-7.22789	0.330399	-22.5236	0.218702	-21.8991		0.23176	-21.697	0.232086	-21.7978	0.232277	-11.0211	0	-21.6252		0.1647	-21.4318	0.286835	-8.11216	0.287546	-8.0225	0.285813	-7.91679		0.75185	-21.342	0.753358	-11.0516	0.753515	-11.124	0.753849	-11.2993
0.28045	-21.1461	0.95288	-7.07854	0.409169	-22.5237	0.273378	-21.901		0.28129	-21.6968	0.281454	-21.7968	0.281547	-11.0217	0.0637306	-21.6228		0.20544	-21.4319	0.32781	-8.12839	0.325357	-8.19042	0.329229	-8.04752		0.7917	-21.3423	0.793641	-10.9725	0.793867	-11.0454	0.794304	-11.2219
0.33082	-21.1449	1	-6.88387	0.487938	-22.5238	0.328053	-21.9019		0.33083	-21.6973	0.330822	-21.7971	0.330817	-10.9886	0.127461	-21.6208		0.24617	-21.4315	0.366441	-8.03011	0.363794	-8.02443	0.368085	-7.9539		0.83155	-21.3425	0.833923	-10.8914	0.83422	-10.9536	0.834759	-11.1251
0.3787	-21.1459	0	--	0.566708	-22.5248	0.385369	-21.9021		0.37852	-21.6971	0.378478	-21.7969	0.378452	-10.9944	0.195238	-21.6203		0.28691	-21.4312	0.405072	-7.81575	0.402231	-7.91886	0.406941	-7.74652		0.87366	-21.3419	0.875442	-10.9348	0.875665	-11.0009	0.87607	-11.1685
0.42658	-21.1466	0	-6.82002	0.645398	-22.5238	0.442684	-21.9027		0.42621	-21.6971	0.426134	-21.798	0.426087	-10.9981	0.263015	-21.6183		0.32765	-21.431	0.443704	-7.50946	0.440668	-7.68203	0.445797	-7.4924		0.91577	-21.3418	0.916961	-10.9774	0.91711	-11.0449	0.91738	-11.2128
0.47447	-21.1468	0.0471196	-6.56076	0.724089	-22.5237	0.5	-21.9034		0.47391	-21.6979	0.47379	-21.7985	0.473722	-11.0005	0.330792	-21.6158		0.37398	-21.4316	0.482335	-7.63084	0.479105	-7.5203	0.484653	-7.28157		0.95789	-21.3423	0.958481	-10.965	0.958555	-11.0289	0.95869	-11.2053
0.52235	-21.1466	0.0942392	-6.21876	0.791135	-22.5235	0.554676	-21.903		0.5216	-21.6977	0.521446	-21.7982	0.521357	-11.0022	0.410782	-21.6187		0.42032	-21.4314	0.520967	-7.95961	0.517542	-7.45927	0.523509	-7.55872		1	-21.3421	1	-10.9042	1	-10.9629	1	-11.131
0.57023	-21.1458	0.141359	-5.83921	0.85818	-22.5243	0.609351	-21.9015		0.56929	-21.6972	0.569102	-21.7968	0.568992	-10.9707	0.490773	-21.6226		0.46666	-21.4312	0.559598	-8.22338	0.555979	-7.7724	0.562365	-7.84005		0	--	0	--	0	--	0	--
0.62338	-21.1467	0.188659	-6.03477	0.92909	-22.524	0.664027	-21.8995		0.62223	-21.6978	0.622	-21.7984	0.621866	-11.0024	0.570763	-21.6252		0.51299	-21.4314	0.598191	-7.95991	0.594377	-7.4596	0.601182	-7.55904		0	-21.3417	0	-10.9013	0	-10.9628	0	-11.1309
0.67654	-21.1468	0.235958	-6.47729	1	-22.5248	0.718702	-21.8976		0.67517	-21.6977	0.674899	-21.7984	0.674741	-11	0.650673	-21.6226		0.55933	-21.4316	0.636783	-7.63155	0.632776	-7.5201	0.64	-7.28089		0.04211	-21.3412	0.0415193	-10.9597	0.0414449	-11.0255	0.0413101	-11.1967
0.72969	-21.1464	0.283258	-6.99545	0	--	0.773378	-21.8964		0.72811	-21.6971	0.727797	-21.7975	0.727616	-10.9971	0.730584	-21.6187		0.61076	-21.4313	0.675376	-7.50845	0.671174	-7.68135	0.678817	-7.4935		0.08423	-21.3415	0.0830387	-10.8778	0.0828899	-10.9513	0.0826203	-11.1427
0.77667	-21.1472	0.330558	-7.51124	0	-22.5217	0.828053	-21.8964		0.77451	-21.6973	0.774081	-21.7986	0.773832	-11.0215	0.801561	-21.6204		0.6622	-21.4313	0.713969	-7.81469	0.709573	-7.91795	0.717634	-7.7455		0.12634	-21.3416	0.124558	-10.8466	0.124335	-10.9113	0.12393	-11.0829
0.82366	-21.1481	0.389612	-7.23678	0.0709098	-22.5219	0.885369	-21.8964		0.82091	-21.6981	0.820365	-21.7997	0.820048	-11.0392	0.872539	-21.6208		0.71363	-21.4312	0.754675	-7.8114	0.748344	-7.71221	0.759901	-7.60543		0.16845	-21.3425	0.166077	-10.8822	0.16578	-10.9517	0.165241	-11.119
0.87064	-21.1489	0.448667	-6.97845	0.14182	-22.5243	0.942684	-21.8968		0.86731	-21.699	0.86665	-21.8003	0.866263	-10.9589	0.936269	-21.6228		0.75419	-21.4313	0.795382	-7.84045	0.787115	-7.69503	0.802168	-7.59433		0.22124	-21.3426	0.20639	-10.7841	0.20619	-10.838	0.205814	-11.0011
0.91376	-21.1478	0.507721	-6.80533	0.236109	-22.5236	1	-21.897		0.91154	-21.6983	0.9111	-21.7995	0.910842	-10.962	1	-21.6252		0.79475	-21.4316	0.836088	-7.7681	0.825886	-7.84534	0.844435	-7.49462		0.27403	-21.3422	0.246703	-10.7063	0.2466	-10.757	0.246388	-10.917
0.95688	-21.147	0.566775	-6.82002	0.330399	-22.5236	0	--		0.95577	-21.6975	0.95555	-21.7981	0.955421	-10.9757	0	--		0.8353	-21.4318	0.877066	-7.91606	0.869415	-7.90904	0.883327	-7.63304		0.32682	-21.3417	0.287015	-10.6629	0.28701	-10.7121	0.286962	-10.8726
1	-21.1458	0.619216	-6.79648	0.409169	-22.5226	0	-21.897		1	-21.6972	1	-21.7968	1	-10.9707	0	-21.6184		0.87648	-21.4316	0.918044	-7.46685	0.912943	-7.80094	0.922218	-7.61288		0.37306	-21.3422	0.327328	-10.6501	0.32742	-10.6987	0.327536	-10.8614
0	--	0.671656	-6.92861	0.487938	-22.5226	0.0546755	-21.8969		0	--	0	--	0	--	0.0637306	-21.6195		0.91765	-21.431	0.959022	-7.8288	0.956472	-7.53561	0.961109	-7.81639		0.4193	-21.3417	0.373636	-10.6916	0.373728	-10.7475	0.373857	-10.9184
0	-21.1458	0.724096	-7.14584	0.566708	-22.5217	0.109351	-21.8968		0	-21.697	0	-21.7968	0	-10.9696	0.127461	-21.6208		0.95883	-21.4315	1	-8.22338	1	-7.7724	1	-7.84005		0.46554	-21.3411	0.419944	-10.7851	0.420035	-10.8505	0.420179	-11.0322
0.04312	-21.1445	0.768944	-6.60011	0.645398	-22.5226	0.164027	-21.8959		0.04423	-21.6974	0.0444501	-21.798	0.0445789	-10.9684	0.195238	-21.6201		1	-21.4316	0	--	0	--	0	--		0.51178	-21.3413	0.466253	-10.9224	0.466343	-10.9938	0.4665	-11.1718
0.08624	-21.1431	0.813793	-6.12115	0.724089	-22.5226	0.218702	-21.8916		0.08846	-21.6981	0.0889002	-21.7993	0.0891577	-10.9617	0.263015	-21.618		0	--	0	-7.22268	0	-7.42251	0	-7.16546		0.55802	-21.3417	0.512561	-10.886	0.51265	-10.9479	0.512822	-11.1102
0.12936	-21.1419	0.858641	-5.83921	0.791135	-22.5233	0.273378	-21.8906		0.13269	-21.6989	0.13335	-21.8002	0.133737	-10.9578	0.330792	-21.6157		0	-21.4311	0.040978	-7.19425	0.0435284	-7.38518	0.0388911	-7.15524		0.60935	-21.3412	0.55887	-10.9013	0.558958	-10.9628	0.559143	-11.1309
0.17972	-21.1421	0.905761	-6.21876	0.85818	-22.5243	0.328053	-21.891		0.18222	-21.6978	0.182718	-21.7992	0.183007	-10.9023	0.410782	-21.6179		0.04117	-21.4311	0.081956	-7.33804	0.0870568	-7.27397	0.0777823	-7.56691		0.66068	-21.3412	0.597421	-10.9067	0.597509	-10.9702	0.597706	-11.1337
0.23009	-21.1428	0.95288	-6.56076	0.92909	-22.5219	0.385369	-21.8906		0.23176	-21.6969	0.232086	-21.7977	0.232277	-10.896	0.490773	-21.6185		0.08235	-21.431	0.122934	-7.54098	0.130585	-7.42307	0.116673	-7.33217		0.71201	-21.3419	0.635973	-10.8916	0.63606	-10.9601	0.636269	-11.136
0.28045	-21.1438	1	-6.82002	1	-22.5217	0.442684	-21.8896		0.28129	-21.6968	0.281454	-21.7967	0.281547	-10.9305	0.570763	-21.6184		0.12352	-21.4315	0.163912	-7.76554	0.174114	-7.63801	0.155565	-7.48924		0.75185	-21.3418	0.674525	-10.8509	0.674611	-10.9219	0.674831	-11.1096
0.33082	-21.1449	0	--	0	--	0.5	-21.888		0.33083	-21.6973	0.330822	-21.797	0.330817	-10.9885	0.650673	-21.6185		0.1647	-21.4318	0.204886	-7.46741	0.211924	-7.52942	0.198981	-7.18153		0.7917	-21.3421	0.713076	-10.7486	0.713162	-10.8106	0.713394	-10.9885
0.3787	-21.1443	0	-6.43464	0	-22.5214	0.554676	-21.8917		0.37852	-21.6967	0.378478	-21.7968	0.378452	-10.9809	0.730584	-21.6179		0.20544	-21.4319	0.245861	-7.11369	0.249735	-7.25698	0.242397	-6.84815		0.83155	-21.3425	0.753358	-10.7314	0.753515	-10.7816	0.753849	-10.9579
0.42658	-21.1443	0.0471196	-6.21817	0.0709098	-22.5215	0.609351	-21.8946		0.42621	-21.697	0.426134	-21.7968	0.426087	-10.9722	0.801561	-21.62		0.24617	-21.4315	0.286835	-6.76871	0.287546	-6.90674	0.285813	-6.59655		0.87366	-21.3416	0.793641	-10.8028	0.793867	-10.8613	0.794304	-11.0244
0.47447	-21.1445	0.0942392	-5.74813	0.14182	-22.5222	0.664027	-21.8965		0.47391	-21.6971	0.47379	-21.7968	0.473722	-10.9643	0.872539	-21.6208		0.28691	-21.4312	0.32781	-6.55273	0.325357	-6.59287	0.329229	-6.47998		0.91577	-21.3415	0.833923	-10.8822	0.83422	-10.9517	0.834759	-11.119
0.52235	-21.1451	0.141359	-5.83913	0.236109	-22.5226	0.718702	-21.8974		0.5216	-21.6971	0.521446	-21.7968	0.521357	-10.9586	0.936269	-21.6195		0.32765	-21.431	0.366441	-6.76363	0.363794	-6.86484	0.368085	-6.73565		0.95789	-21.3412	0.875442	-10.8466	0.875665	-10.9113	0.87607	-11.0829
0.57023	-21.1458	0.188659	-6.03407	0.330399	-22.5234	0.773378	-21.8964		0.56929	-21.697	0.569102	-21.7968	0.568992	-10.9696	1	-21.6184		0.37398	-21.4311	0.405072	-6.97927	0.402231	-7.26038	0.406941	-7.1093		1	-21.3417	0.916961	-10.8778	0.91711	-10.9513	0.91738	-11.1427
0.62338	-21.145	0.235958	-6.47583	0.409169	-22.5224	0.828053	-21.8958		0.62223	-21.6971	0.622	-21.7968	0.621866	-10.9591	0	--		0.42032	-21.4312	0.443704	-7.26426	0.440668	-7.64163	0.445797	-7.45907		0	--	0.958481	-10.9597	0.958555	-11.0255	0.95869	-11.1967
0.67654	-21.1444	0.283258	-6.99368	0.487938	-22.5217	0.885369	-21.8964		0.67517	-21.6971	0.674899	-21.7968	0.674741	-10.9659	0	-21.6183		0.46666	-21.4312	0.482335	-7.36435	0.479105	-7.42623	0.484653	-7.21654		0	-21.3407	1	-10.9013	1	-10.9628	1	-11.1309
0.72969	-21.1442	0.330558	-7.51092	0.566708	-22.5214	0.942684	-21.8968		0.72811	-21.6968	0.727797	-21.7968	0.727616	-10.9751	0.0637306	-21.6192		0.51299	-21.4312	0.520967	-7.19731	0.517542	-7.44997	0.523509	-7.14246		0.04211	-21.3407	0	--	0	--	0	--
0.77667	-21.1433	0.389612	-6.757	0.645398	-22.5217	1	-21.897		0.77451	-21.697	0.774081	-21.7975	0.773832	-10.9297	0.127461	-21.6206		0.55933	-21.4311	0.559598	-7.22268	0.555979	-7.42251	0.562365	-7.16546		0.08423	-21.3411	0	-10.8582	0	-10.9229	0	-11.1001
0.82366	-21.1425	0.448667	-6.05726	0.724089	-22.5224	0	--		0.82091	-21.6979	0.820365	-21.7991	0.820048	-10.9145	0.195238	-21.62		0.61076	-21.4312	0.598191	-7.19736	0.594377	-7.44992	0.601182	-7.14251		0.12634	-21.3414	0.0415193	-10.832	0.0414449	-10.8951	0.0413101	-11.0694
0.87064	-21.1419	0.507721	-6.31176	0.791135	-22.5221	0	-21.8898		0.86731	-21.6989	0.86665	-21.8002	0.866263	-10.9578	0.263015	-21.6179		0.6622	-21.4312	0.636783	-7.36367	0.632776	-7.42586	0.64	-7.21664		0.16845	-21.3416	0.0830387	-10.8248	0.0828899	-10.8879	0.0826203	-11.0603
0.91376	-21.1431	0.566775	-6.43464	0.85818	-22.5222	0.0546755	-21.8897		0.91154	-21.6981	0.9111	-21.7993	0.910842	-10.9617	0.330792	-21.6157		0.71363	-21.4311	0.675376	-7.26538	0.671174	-7.6427	0.678817	-7.45816		0.22124	-21.3415	0.124558	-10.8444	0.124335	-10.9084	0.12393	-11.0758
0.95688	-21.1445	0.619216	-6.3352	0.92909	-22.5215	0.109351	-21.8893		0.95577	-21.6974	0.95555	-21.798	0.955421	-10.9684	0.410782	-21.6175		0.75419	-21.4311	0.713969	-6.98001	0.709573	-7.26198	0.717634	-7.11085		0.27403	-21.3414	0.166077	-10.8789	0.16578	-10.9513	0.165241	-11.1187
1	-21.1458	0.671656	-6.10392	1	-22.5214	0.164027	-21.8878		1	-21.697	1	-21.7968	1	-10.9696	0.490773	-21.6182		0.79475	-21.4314	0.754675	-7.27535	0.748344	-7.52933	0.759901	-6.98935		0.32682	-21.3417	0.20639	-10.7746	0.20619	-10.8373	0.205814	-11.0002
0	--	0.724096	-6.49938	0	--	0.218702	-21.8895		0	--	0	--	0	--	0.570763	-21.6183		0.8353	-21.4318	0.795382	-7.57355	0.787115	-7.67189	0.802168	-7.25892		0.37306	-21.3414	0.246703	-10.7007	0.2466	-10.7564	0.246388	-10.9162
0	-21.1399	0.768944	-6.13672	0	-22.5212	0.273378	-21.8864		0	-21.697	0	-21.7968	0	-10.9566	0.650673	-21.6182		0.87648	-21.4315	0.836088	-7.76554	0.825886	-7.63801	0.844435	-7.48924		0.4193	-21.3414	0.287015	-10.6604	0.28701	-10.7116	0.286962	-10.8719
0.04312	-21.1401	0.813793	-5.87206	0.0709098	-22.5212	0.328053	-21.8846		0.04423	-21.6973	0.0444501	-21.798	0.0445789	-10.9673	0.730584	-21.6175		0.91765	-21.431	0.877066	-7.54098	0.869415	-7.42307	0.883327	-7.33217		0.46554	-21.341	0.327328	-10.6485	0.32742	-10.698	0.327536	-10.8607
0.08624	-21.1409	0.858641	-5.83913	0.14182	-22.5222	0.385369	-21.8845		0.08846	-21.698	0.0889002	-21.7993	0.0891577	-10.9606	0.801561	-21.6197		0.95883	-21.4311	0.918044	-7.33804	0.912943	-7.27397	0.922218	-7.56691		0.51178	-21.3407	0.373636	-10.6824	0.373728	-10.7364	0.373857	-10.9018
0.12936	-21.1419	0.905761	-5.74813	0.236109	-22.5224	0.442684	-21.8858		0.13269	-21.6989	0.13335	-21.8002	0.133737	-10.9578	0.872539	-21.6206		1	-21.4311	0.959022	-7.19425	0.956472	-7.38518	0.961109	-7.15524		0.55802	-21.3407	0.419944	-10.7337	0.420035	-10.791	0.420179	-10.959
0.17972	-21.1421	0.95288	-6.21817	0.330399	-22.5234	0.5	-21.8879		0.18222	-21.6978	0.182718	-21.7992	0.183007	-10.9023	0.936269	-21.6192		0	--	1	-7.22268	1	-7.42251	1	-7.16546		0.60935	-21.3407	0.466253	-10.7879	0.466343	-10.8482	0.4665	-11.0192
0.23009	-21.1428	1	-6.43464	0.409169	-22.5222	0.554676	-21.885		0.23176	-21.6969	0.232086	-21.7977	0.232277	-10.896	1	-21.6183		0	-21.4307	0	--	0	--	0	--		0.66068	-21.3412	0.512561	-10.8538	0.51265	-10.9204	0.512822	-11.0943
0.28045	-21.1438	0	--	0.487938	-22.5214	0.609351	-21.8861		0.28129	-21.6968	0.281454	-21.7967	0.281547	-10.9304	0	--		0.04117	-21.4307	0	-7.10966	0	-7.35918	0	-7.0675		0.71201	-21.3413	0.55887	-10.8582	0.558958	-10.9229	0.559143	-11.1001
0.33082	-21.1449	0	-5.14338	0.566708	-22.5212	0.664027	-21.8869		0.33083	-21.6973	0.330822	-21.797	0.330817	-10.9885	0	-21.6182		0.08235	-21.431	0.040978	-7.15402	0.0435284	-7.29316	0.0388911	-7.08716		0.75185	-21.3413	0.597421	-10.8501	0.597509	-10.9164	0.597706	-11.0907
0.3787	-21.1437	0.0471196	-5.12927	0.645398	-22.5214	0.718702	-21.8903		0.37852	-21.6966	0.378478	-21.7968	0.378452	-10.8962	0.0637306	-21.6182		0.12352	-21.431	0.081956	-7.3138	0.0870568	-7.02017	0.0777823	-7.1769		0.7917	-21.3415	0.635973	-10.8089	0.63606	-10.8661	0.636269	-11.0379
0.42658	-21.1423	0.0942392	-5.43483	0.724089	-22.5222	0.773378	-21.8934		0.42621	-21.6969	0.426134	-21.7967	0.426087	-10.8452	0.127461	-21.6204		0.1647	-21.4313	0.122934	-7.53665	0.130585	-7.30962	0.116673	-7.31362		0.83155	-21.3416	0.674525	-10.7611	0.674611	-10.8202	0.674831	-10.9897
0.47447	-21.1411	0.141359	-5.11917	0.791135	-22.522	0.828053	-21.8957		0.47391	-21.6971	0.47379	-21.7967	0.473722	-10.8428	0.195238	-21.6197		0.20544	-21.4312	0.163912	-7.76474	0.174114	-7.63767	0.155565	-7.4752		0.87366	-21.3414	0.713076	-10.7159	0.713162	-10.7722	0.713394	-10.9392
0.52235	-21.1402	0.188659	-5.22564	0.85818	-22.5222	0.885369	-21.8913		0.5216	-21.6971	0.521446	-21.7968	0.521357	-10.8876	0.263015	-21.6176		0.24617	-21.431	0.204886	-7.4655	0.211924	-7.5281	0.198981	-7.17961		0.91577	-21.3411	0.753358	-10.7213	0.753515	-10.7807	0.753849	-10.9414
0.57023	-21.1399	0.235958	-5.24067	0.92909	-22.5212	0.942684	-21.8897		0.56929	-21.697	0.569102	-21.7968	0.568992	-10.9566	0.330792	-21.6157		0.28691	-21.4309	0.245861	-7.11173	0.249735	-7.25552	0.242397	-6.84354		0.95789	-21.3407	0.793641	-10.7797	0.793867	-10.8391	0.794304	-11.0034
0.62338	-21.1403	0.283258	-5.16008	1	-22.5212	1	-21.8898		0.62223	-21.6971	0.622	-21.7968	0.621866	-10.8806	0.410782	-21.6169		0.32765	-21.431	0.286835	-6.76682	0.287546	-6.9065	0.285813	-6.5859		1	-21.3407	0.833923	-10.8789	0.83422	-10.9513	0.834759	-11.1187
0.67654	-21.1414	0.330558	-5.01235	0	--	0	--		0.67517	-21.6971	0.674899	-21.7967	0.674741	-10.8391	0.490773	-21.6173		0.37398	-21.4309	0.32781	-6.55269	0.325357	-6.59267	0.329229	-6.47974		0	--	0.875442	-10.8444	0.875665	-10.9084	0.87607	-11.0758
0.72969	-21.1428	0.389612	-5.57672	0	-22.5208	0	-21.8898		0.72811	-21.6967	0.727797	-21.7968	0.727616	-10.8569	0.570763	-21.6182		0.42032	-21.4308	0.366441	-6.63565	0.363794	-6.79973	0.368085	-6.69054		0	-21.3404	0.916961	-10.8248	0.91711	-10.8879	0.91738	-11.0603
0.77667	-21.142	0.448667	-5.94772	0.0709098	-22.5212	0.0546755	-21.8897		0.77451	-21.6969	0.774081	-21.7974	0.773832	-10.8657	0.650673	-21.6173		0.46666	-21.4307	0.405072	-6.90179	0.402231	-6.97465	0.406941	-6.87662		0.04211	-21.3407	0.958481	-10.832	0.958555	-10.8951	0.95869	-11.0694
0.82366	-21.1417	0.507721	-5.30103	0.14182	-22.5212	0.109351	-21.8893		0.82091	-21.6977	0.820365	-21.799	0.820048	-10.8991	0.730584	-21.6169		0.51299	-21.4308	0.443704	-7.26305	0.440668	-7.07952	0.445797	-6.98598		0.08423	-21.3402	1	-10.8582	1	-10.9229	1	-11.1001
0.87064	-21.1419	0.566775	-5.14338	0.236109	-22.5212	0.164027	-21.8878		0.86731	-21.6989	0.86665	-21.8002	0.866263	-10.9578	0.801561	-21.6194		0.55933	-21.4307	0.482335	-7.18656	0.479105	-7.16005	0.484653	-7.21145		0.12634	-21.3411	0	--	0	--	0	--
0.91376	-21.1409	0.619216	-5.23799	0.330399	-22.5221	0.218702	-21.885		0.91154	-21.698	0.9111	-21.7993	0.910842	-10.9606	0.872539	-21.6204		0.61076	-21.4308	0.520967	-7.15497	0.517542	-7.40078	0.523509	-7.13226		0.16845	-21.3416	0	-10.8526	0	-10.9228	0	-11.0995
0.95688	-21.1401	0.671656	-5.81386	0.409169	-22.5218	0.273378	-21.8844		0.95577	-21.6973	0.95555	-21.798	0.955421	-10.9673	0.936269	-21.6182		0.6622	-21.4307	0.559598	-7.10966	0.555979	-7.35918	0.562365	-7.0675		0.22124	-21.3414	0.0415193	-10.8275	0.0414449	-10.8921	0.0413101	-11.0616
1	-21.1399	0.724096	-5.73742	0.487938	-22.5209	0.328053	-21.8846		1	-21.697	1	-21.7968	1	-10.9566	1	-21.6182		0.71363	-21.4311	0.598191	-7.1549	0.594377	-7.40082	0.601182	-7.13219		0.27403	-21.3413	0.0830387	-10.8213	0.0828899	-10.885	0.0826203	-11.0528
0	--	0.768944	-5.61625	0.566708	-22.5208	0.385369	-21.8845		0	--	0	--	0	--	0	--		0.75419	-21.4311	0.636783	-7.18659	0.632776	-7.15987	0.64	-7.2118		0.32682	-21.3416	0.124558	-10.7463	0.124335	-10.8085	0.12393	-10.9893
0	-21.1386	0.813793	-5.40299	0.645398	-22.5209	0.442684	-21.8841		0	-21.6938	0	-21.7966	0	-7.57611	0	-21.6178		0.79475	-21.4314	0.675376	-7.26418	0.671174	-7.08002	0.678817	-6.98614		0.37306	-21.3412	0.166077	-10.6793	0.16578	-10.7302	0.165241	-10.9041
0.04312	-21.1383	0.858641	-5.11917	0.724089	-22.5218	0.5	-21.8835		0.04423	-21.6937	0.0444501	-21.7956	0.0445789	-7.64186	0.0637306	-21.6179		0.8353	-21.4313	0.713969	-6.90313	0.709573	-6.97521	0.717634	-6.87723		0.4193	-21.3408	0.20639	-10.6751	0.20619	-10.7257	0.205814	-10.8987
0.08624	-21.1377	0.905761	-5.43483	0.791135	-22.5218	0.554676	-21.885		0.08846	-21.6934	0.0889002	-21.7945	0.0891577	-7.65019	0.127461	-21.6203		0.87648	-21.431	0.754675	-7.13843	0.748344	-7.11473	0.759901	-6.94806		0.46554	-21.3404	0.246703	-10.6641	0.2466	-10.7142	0.246388	-10.8848
0.12936	-21.1369	0.95288	-5.12927	0.85818	-22.5212	0.609351	-21.8861		0.13269	-21.6931	0.13335	-21.7937	0.133737	-7.59304	0.195238	-21.6196		0.91765	-21.431	0.795382	-7.43256	0.787115	-7.41964	0.802168	-7.17971		0.51178	-21.3406	0.287015	-10.6516	0.28701	-10.7014	0.286962	-10.8683
0.17972	-21.1369	1	-5.14338	0.92909	-22.5212	0.664027	-21.8868		0.18222	-21.6936	0.182718	-21.7944	0.183007	-7.58512	0.263015	-21.6175		0.95883	-21.4307	0.836088	-7.76474	0.825886	-7.63767	0.844435	-7.4752		0.55802	-21.3404	0.327328	-10.6456	0.32742	-10.6955	0.327536	-10.8589
0.23009	-21.136	0	--	1	-22.5208	0.718702	-21.8874		0.23176	-21.6938	0.232086	-21.795	0.232277	-7.5632	0.330792	-21.6157		1	-21.4307	0.877066	-7.53665	0.869415	-7.30962	0.883327	-7.31362		0.60935	-21.3407	0.373636	-10.6475	0.373728	-10.6963	0.373857	-10.8538
0.28045	-21.1344	0	-4.99078	0	--	0.773378	-21.8877		0.28129	-21.6936	0.281454	-21.7952	0.281547	-7.5321	0.410782	-21.6163		0	--	0.918044	-7.3138	0.912943	-7.02017	0.922218	-7.1769		0.66068	-21.3402	0.419944	-10.6911	0.420035	-10.7414	0.420179	-10.8967
0.33082	-21.1322	0.0471196	-5.09752	0	-22.5204	0.828053	-21.8874		0.33083	-21.6934	0.330822	-21.7945	0.330817	-7.49707	0.490773	-21.617		0	-21.4306	0.959022	-7.15402	0.956472	-7.29316	0.961109	-7.08716		0.71201	-21.3411	0.466253	-10.7727	0.466343	-10.8281	0.4665	-10.985
0.3787	-21.1341	0.0942392	-5.05371	0.0709098	-22.521	0.885369	-21.8891		0.37852	-21.6938	0.378478	-21.7951	0.378452	-7.57967	0.570763	-21.6178		0.04117	-21.4307	1	-7.10966	1	-7.35918	1	-7.0675		0.75185	-21.3413	0.512561	-10.8339	0.51265	-10.8972	0.512822	-11.0704
0.42658	-21.1358	0.141359	-5.11905	0.14182	-22.5212	0.942684	-21.8897		0.42621	-21.6942	0.426134	-21.7957	0.426087	-7.62776	0.650673	-21.617		0.08235	-21.431	0	--	0	--	0	--		0.7917	-21.3414	0.55887	-10.8526	0.558958	-10.9228	0.559143	-11.0995
0.47447	-21.1373	0.188659	-5.22458	0.236109	-22.5212	1	-21.8898		0.47391	-21.6941	0.47379	-21.7962	0.473722	-7.63971	0.730584	-21.6163		0.12352	-21.4309	0	-7.09753	0	-7.35239	0	-7.06045		0.83155	-21.3416	0.597421	-10.8401	0.597509	-10.9038	0.597706	-11.0771
0.52235	-21.1383	0.235958	-5.23954	0.330399	-22.5221	0	--		0.5216	-21.6938	0.521446	-21.7965	0.521357	-7.61683	0.801561	-21.6188		0.1647	-21.4313	0.040978	-7.14293	0.0435284	-7.1218	0.0388911	-7.07259		0.87366	-21.3411	0.635973	-10.8034	0.63606	-10.8651	0.636269	-11.0235
0.57023	-21.1386	0.283258	-5.15877	0.409169	-22.5218	0	-21.8806		0.56929	-21.6938	0.569102	-21.7966	0.568992	-7.57611	0.872539	-21.6203		0.20544	-21.4312	0.081956	-7.30658	0.0870568	-7.00835	0.0777823	-7.1578		0.91577	-21.3402	0.674525	-10.7277	0.674611	-10.7802	0.674831	-10.9358
0.62338	-21.1382	0.330558	-5.01203	0.487938	-22.5206	0.0546755	-21.8832		0.62223	-21.6939	0.622	-21.7965	0.621866	-7.62095	0.936269	-21.6179		0.24617	-21.431	0.122934	-6.96444	0.130585	-7.09094	0.116673	-7.1241		0.95789	-21.3407	0.713076	-10.6722	0.713162	-10.7217	0.713394	-10.8772
0.67654	-21.137	0.389612	-5.23012	0.566708	-22.5204	0.109351	-21.8857		0.67517	-21.6941	0.674899	-21.7961	0.674741	-7.64015	1	-21.6178		0.28691	-21.4309	0.163912	-6.78258	0.174114	-6.84345	0.155565	-6.7501		1	-21.3404	0.753358	-10.7182	0.753515	-10.7776	0.753849	-10.9393
0.72969	-21.1353	0.448667	-5.31594	0.645398	-22.5206	0.164027	-21.8877		0.72811	-21.6941	0.727797	-21.7955	0.727616	-7.61588	0	--		0.32765	-21.431	0.204886	-6.75779	0.211924	-6.80785	0.198981	-6.7228		0	--	0.793641	-10.6969	0.793867	-10.7538	0.794304	-10.9295
0.77667	-21.1366	0.507721	-5.24211	0.724089	-22.5218	0.218702	-21.885		0.77451	-21.6939	0.774081	-21.7955	0.773832	-7.61834	0	-21.6168		0.37398	-21.4308	0.245861	-6.68642	0.249735	-6.70488	0.242397	-6.64547		0	-21.34	0.833923	-10.6793	0.83422	-10.7302	0.834759	-10.9041
0.82366	-21.1371	0.566775	-4.99078	0.791135	-22.5214	0.273378	-21.8844		0.82091	-21.6936	0.820365	-21.7946	0.820048	-7.61272	0.0637306	-21.6171		0.42032	-21.4307	0.286835	-6.58531	0.287546	-6.55754	0.285813	-6.53927		0.04211	-21.3399	0.875442	-10.7463	0.875665	-10.8085	0.87607	-10.9893
0.87064	-21.1369	0.619216	-5.22291	0.85818	-22.5212	0.328053	-21.8808		0.86731	-21.6931	0.86665	-21.7937	0.866263	-7.59304	0.127461	-21.6155		0.46666	-21.4307	0.32781	-6.55131	0.325357	-6.58313	0.329229	-6.46613		0.08423	-21.3402	0.916961	-10.8213	0.91711	-10.885	0.91738	-11.0528
0.91376	-21.1377	0.671656	-5.31415	0.92909	-22.521	0.385369	-21.8834		0.91154	-21.6934	0.9111	-21.7945	0.910842	-7.65019	0.195238	-21.6148		0.51299	-21.4306	0.366441	-6.63512	0.363794	-6.62643	0.368085	-6.49765		0.12634	-21.3401	0.958481	-10.8275	0.958555	-10.8921	0.95869	-11.0616
0.95688	-21.1383	0.724096	-5.27514	1	-22.5204	0.442684	-21.8841		0.95577	-21.6937	0.95555	-21.7956	0.955421	-7.64186	0.263015	-21.6143		0.55933	-21.4306	0.405072	-6.90084	0.402231	-6.87533	0.406941	-6.71237		0.16845	-21.3389	1	-10.8526	1	-10.9228	1	-11.0995
1	-21.1386	0.768944	-4.87735	0	--	0.5	-21.8834		1	-21.6938	1	-21.7966	1	-7.57611	0.330792	-21.6143		0.61076	-21.4306	0.443704	-7.12601	0.440668	-7.06653	0.445797	-6.89988		0.22124	-21.339	0	--	0	--	0	--
0	--	0.813793	-5.03689	0	-22.5202	0.554676	-21.8836		0	--	0	--	0	--	0.410782	-21.6151		0.6622	-21.4306	0.482335	-7.16747	0.479105	-7.09896	0.484653	-7.03242		0.27403	-21.3392	0	-10.6652	0	-10.7113	0	-10.8786
0	-21.1386	0.858641	-5.11905	0.0709098	-22.5208	0.609351	-21.8824		0	-21.6937	0	-21.7966	0	-7.57601	0.490773	-21.6168		0.71363	-21.4308	0.520967	-7.09062	0.517542	-7.21157	0.523509	-7.00276		0.32682	-21.3392	0.0415193	-10.6612	0.0414449	-10.7077	0.0413101	-10.875
0.04312	-21.1383	0.905761	-5.05371	0.14182	-22.5203	0.664027	-21.8866		0.04423	-21.6936	0.0444501	-21.7955	0.0445789	-7.57972	0.570763	-21.6168		0.75419	-21.431	0.559598	-7.09753	0.555979	-7.35239	0.562365	-7.06045		0.37306	-21.34	0.0830387	-10.6531	0.0828899	-10.7006	0.0826203	-10.8685
0.08624	-21.1377	0.95288	-5.09752	0.236109	-22.5208	0.718702	-21.8873		0.08846	-21.6934	0.0889002	-21.7945	0.0891577	-7.51433	0.650673	-21.6168		0.79475	-21.4311	0.598191	-7.09065	0.594377	-7.21173	0.601182	-7.00283		0.4193	-21.3399	0.124558	-10.6519	0.124335	-10.7016	0.12393	-10.8713
0.12936	-21.1369	1	-4.99078	0.330399	-22.522	0.773378	-21.8876		0.13269	-21.6931	0.13335	-21.7937	0.133737	-7.593	0.730584	-21.6151		0.8353	-21.4313	0.636783	-7.16688	0.632776	-7.09956	0.64	-7.0326		0.46554	-21.34	0.166077	-10.6725	0.16578	-10.7301	0.165241	-10.9035
0.17972	-21.1369	0	--	0.409169	-22.521	0.828053	-21.8874		0.18222	-21.6936	0.182718	-21.7944	0.183007	-7.58508	0.801561	-21.6154		0.87648	-21.4309	0.675376	-7.12633	0.671174	-7.06663	0.678817	-6.90037		0.51178	-21.34	0.20639	-10.6685	0.20619	-10.7256	0.205814	-10.8981
0.23009	-21.136	0	-4.98643	0.487938	-22.5201	0.885369	-21.889		0.23176	-21.6938	0.232086	-21.795	0.232277	-7.56316	0.872539	-21.6155		0.91765	-21.431	0.713969	-6.90217	0.709573	-6.87627	0.717634	-6.7132		0.55802	-21.34	0.246703	-10.6582	0.2466	-10.7141	0.246388	-10.8841
0.28045	-21.1344	0.0471196	-4.85599	0.566708	-22.5202	0.942684	-21.8862		0.28129	-21.6936	0.281454	-21.7952	0.281547	-7.53206	0.936269	-21.6171		0.95883	-21.4307	0.754675	-6.86068	0.748344	-6.92933	0.759901	-6.92544		0.60935	-21.3399	0.287015	-10.6466	0.28701	-10.7013	0.286962	-10.8676
0.33082	-21.1322	0.0942392	-4.79862	0.645398	-22.5201	1	-21.8806		0.33083	-21.6934	0.330822	-21.7945	0.330817	-7.49702	1	-21.6168		1	-21.4306	0.795382	-6.84507	0.787115	-6.92851	0.802168	-6.8306		0.66068	-21.3401	0.327328	-10.6409	0.32742	-10.6954	0.327536	-10.8583
0.3787	-21.1339	0.141359	-4.94583	0.724089	-22.521	0	--		0.37852	-21.6938	0.378478	-21.7949	0.378452	-7.53697	0	--		0	--	0.836088	-6.78258	0.825886	-6.84345	0.844435	-6.7501		0.71201	-21.3401	0.373636	-10.6302	0.373728	-10.6783	0.373857	-10.8407
0.42658	-21.1354	0.188659	-4.64448	0.791135	-22.5207	0	-21.8805		0.42621	-21.6941	0.426134	-21.7955	0.426087	-7.57224	0	-21.6165		0	-21.4285	0.877066	-6.96444	0.869415	-7.09094	0.883327	-7.1241		0.75185	-21.3401	0.419944	-10.6332	0.420035	-10.6798	0.420179	-10.8433
0.47447	-21.137	0.235958	-4.56244	0.85818	-22.5203	0.0546755	-21.88		0.47391	-21.694	0.47379	-21.7961	0.473722	-7.59598	0.0637306	-21.6169		0.04117	-21.4288	0.918044	-7.30658	0.912943	-7.00835	0.922218	-7.1578		0.7917	-21.3393	0.466253	-10.6465	0.466343	-10.6927	0.4665	-10.8578
0.52235	-21.1382	0.283258	-4.81043	0.92909	-22.5208	0.109351	-21.8816		0.5216	-21.6938	0.521446	-21.7964	0.521357	-7.61313	0.127461	-21.6154		0.08235	-21.4294	0.959022	-7.14293	0.956472	-7.1218	0.961109	-7.07259		0.83155	-21.3389	0.512561	-10.6598	0.51265	-10.7059	0.512822	-10.8726
0.57023	-21.1386	0.330558	-5.01081	1	-22.5202	0.164027	-21.883		0.56929	-21.6937	0.569102	-21.7966	0.568992	-7.57601	0.195238	-21.6147		0.12352	-21.4297	1	-7.09753	1	-7.35239	1	-7.06045		0.87366	-21.3401	0.55887	-10.6652	0.558958	-10.7113	0.559143	-10.8786
0.62338	-21.138	0.389612	-4.70279	0	--	0.218702	-21.8839		0.62223	-21.6938	0.622	-21.7964	0.621866	-7.6113	0.263015	-21.6142		0.1647	-21.429	0	--	0	--	0	--		0.91577	-21.3402	0.597421	-10.6614	0.597509	-10.7075	0.597706	-10.8744
0.67654	-21.1366	0.448667	-4.42905	0	-22.5183	0.273378	-21.8818		0.67517	-21.6941	0.674899	-21.7959	0.674741	-7.59217	0.330792	-21.6143		0.20544	-21.4289	0	-6.88336	0	-6.65245	0	-6.7357		0.95789	-21.3399	0.635973	-10.6514	0.63606	-10.6976	0.636269	-10.8633
0.72969	-21.1349	0.507721	-4.90238	0.0709098	-22.5202	0.328053	-21.8808		0.72811	-21.6941	0.727797	-21.7953	0.727616	-7.56149	0.410782	-21.6145		0.24617	-21.4285	0.040978	-7.06116	0.0435284	-6.74637	0.0388911	-7.00472		1	-21.34	0.674525	-10.6392	0.674611	-10.6856	0.674831	-10.8499
0.77667	-21.136	0.566775	-4.98643	0.14182	-22.5203	0.385369	-21.8807		0.77451	-21.6939	0.774081	-21.7953	0.773832	-7.50058	0.490773	-21.6166		0.28691	-21.4278	0.081956	-7.10582	0.0870568	-6.74157	0.0777823	-7.02828		0	--	0.713076	-10.6306	0.713162	-10.6776	0.713394	-10.8406
0.82366	-21.1367	0.619216	-4.94947	0.236109	-22.5206	0.442684	-21.8822		0.82091	-21.6935	0.820365	-21.7945	0.820048	-7.55577	0.570763	-21.6165		0.32765	-21.427	0.122934	-6.81742	0.130585	-6.56641	0.116673	-6.88424		0	-21.3397	0.753358	-10.6419	0.753515	-10.691	0.753849	-10.8582
0.87064	-21.1369	0.671656	-4.48633	0.330399	-22.522	0.5	-21.8834		0.86731	-21.6931	0.86665	-21.7937	0.866263	-7.593	0.650673	-21.6166		0.37398	-21.4282	0.163912	-6.78201	0.174114	-6.84323	0.155565	-6.72184		0.04211	-21.3396	0.793641	-10.6574	0.793867	-10.7092	0.794304	-10.88
0.91376	-21.1377	0.724096	-4.59392	0.409169	-22.5206	0.554676	-21.8814		0.91154	-21.6934	0.9111	-21.7945	0.910842	-7.51433	0.730584	-21.6145		0.42032	-21.4295	0.204886	-6.75719	0.211924	-6.80763	0.198981	-6.69448		0.08423	-21.3399	0.833923	-10.6725	0.83422	-10.7301	0.834759	-10.9035
0.95688	-21.1383	0.768944	-4.86968	0.487938	-22.5196	0.609351	-21.8799		0.95577	-21.6936	0.95555	-21.7955	0.955421	-7.57972	0.801561	-21.6152		0.46666	-21.4296	0.245861	-6.68574	0.249735	-6.70459	0.242397	-6.61727		0.12634	-21.3386	0.875442	-10.6519	0.875665	-10.7016	0.87607	-10.8713
1	-21.1386	0.813793	-4.76141	0.566708	-22.5183	0.664027	-21.8805		1	-21.6937	1	-21.7966	1	-7.57601	0.872539	-21.6154		0.51299	-21.4289	0.286835	-6.58441	0.287546	-6.5564	0.285813	-6.51375		0.16845	-21.3388	0.916961	-10.6531	0.91711	-10.7006	0.91738	-10.8685
0	--	0.858641	-4.94583	0.645398	-22.5196	0.718702	-21.883		0	--	0	--	0	--	0.936269	-21.6169		0.55933	-21.4285	0.32781	-6.55129	0.325357	-6.58289	0.329229	-6.46508		0.22124	-21.339	0.958481	-10.6612	0.958555	-10.7077	0.95869	-10.875
0	-21.1357	0.905761	-4.79862	0.724089	-22.5206	0.773378	-21.8857		0	-21.6934	0	-21.7966	0	-7.57568	1	-21.6165		0.61076	-21.4289	0.366441	-6.62925	0.363794	-6.5807	0.368085	-6.41967		0.27403	-21.3392	1	-10.6652	1	-10.7113	1	-10.8786
0.04312	-21.1358	0.95288	-4.85599	0.791135	-22.52	0.828053	-21.8873		0.04423	-21.6933	0.0444501	-21.7953	0.0445789	-7.57926	0	--		0.6622	-21.4298	0.405072	-6.82347	0.402231	-6.60794	0.406941	-6.57316		0.32682	-21.3392	0	--	0	--	0	--
0.08624	-21.1362	1	-4.98643	0.85818	-22.5203	0.885369	-21.8844		0.08846	-21.6932	0.0889002	-21.7943	0.0891577	-7.51383	0	-21.6164		0.71363	-21.4291	0.443704	-6.99292	0.440668	-6.78433	0.445797	-6.84874		0.37306	-21.3394	0	-8.32947	0	-8.48903	0	-8.75825
0.12936	-21.1369	0	--	0.92909	-22.5202	0.942684	-21.8811		0.13269	-21.693	0.13335	-21.7937	0.133737	-7.39534	0.0637306	-21.6161		0.75419	-21.4294	0.482335	-7.11857	0.479105	-7.08182	0.484653	-6.92332		0.4193	-21.3391	0.0415193	-8.30325	0.0414449	-8.46175	0.0413101	-8.72972
0.17972	-21.1363	0	-4.96211	1	-22.5183	1	-21.8805		0.18222	-21.6935	0.182718	-21.7943	0.183007	-7.38307	0.127461	-21.6154		0.79475	-21.4293	0.520967	-7.03738	0.517542	-6.87567	0.523509	-6.90781		0.46554	-21.3395	0.0830387	-8.22506	0.0828899	-8.38032	0.0826203	-8.64441
0.23009	-21.1352	0.0471196	-4.85171	0	--	0	--		0.23176	-21.6937	0.232086	-21.7949	0.232277	-7.40667	0.195238	-21.6147		0.8353	-21.429	0.559598	-6.88336	0.555979	-6.65245	0.562365	-6.7357		0.51178	-21.3397	0.124558	-8.0965	0.124335	-8.24606	0.12393	-8.50343
0.28045	-21.1338	0.0942392	-4.48677	0	-22.518	0	-21.879		0.28129	-21.6935	0.281454	-21.795	0.281547	-7.45849	0.263015	-21.6132		0.87648	-21.4297	0.598191	-7.0371	0.594377	-6.87532	0.601182	-6.90752		0.55802	-21.3397	0.166077	-7.93052	0.16578	-8.0617	0.165241	-8.30996
0.33082	-21.1322	0.141359	-4.94579	0.0709098	-22.5185	0.0546755	-21.88		0.33083	-21.6934	0.330822	-21.7945	0.330817	-7.497	0.330792	-21.6143		0.91765	-21.4294	0.636783	-7.11878	0.632776	-7.08211	0.64	-6.92311		0.60935	-21.3397	0.20639	-8.05066	0.20619	-8.18824	0.205814	-8.44316
0.3787	-21.1338	0.188659	-4.64384	0.14182	-22.5185	0.109351	-21.8816		0.37852	-21.6936	0.378478	-21.7948	0.378452	-7.45642	0.410782	-21.6136		0.95883	-21.4288	0.675376	-6.99337	0.671174	-6.78474	0.678817	-6.84979		0.66068	-21.3395	0.246703	-8.07203	0.2466	-8.20784	0.246388	-8.45873
0.42658	-21.1351	0.235958	-4.56015	0.236109	-22.5203	0.164027	-21.883		0.42621	-21.6938	0.426134	-21.7945	0.426087	-7.43434	0.490773	-21.616		1	-21.4285	0.713969	-6.82422	0.709573	-6.60876	0.717634	-6.57404		0.71201	-21.3388	0.287015	-8.0092	0.28701	-8.13603	0.286962	-8.37466
0.47447	-21.1358	0.283258	-4.80848	0.330399	-22.5187	0.218702	-21.8839		0.47391	-21.6938	0.47379	-21.7941	0.473722	-7.55823	0.570763	-21.6164		0	--	0.754675	-6.73804	0.748344	-6.52607	0.759901	-6.76604		0.75185	-21.3388	0.327328	-7.91299	0.32742	-8.01354	0.327536	-8.23775
0.52235	-21.1359	0.330558	-5.01032	0.409169	-22.5199	0.273378	-21.8818		0.5216	-21.6937	0.521446	-21.7952	0.521357	-7.59964	0.650673	-21.616		0	-21.426	0.795382	-6.70068	0.787115	-6.69311	0.802168	-6.76156		0.7917	-21.3388	0.373636	-8.04358	0.373728	-8.19029	0.373857	-8.42946
0.57023	-21.1357	0.389612	-4.33392	0.487938	-22.5196	0.328053	-21.8799		0.56929	-21.6934	0.569102	-21.7966	0.568992	-7.57568	0.730584	-21.6136		0.04117	-21.4262	0.836088	-6.78201	0.825886	-6.84323	0.844435	-6.72184		0.83155	-21.3388	0.419944	-8.23707	0.420035	-8.39806	0.420179	-8.65532
0.62338	-21.1359	0.448667	-4.34554	0.566708	-22.518	0.385369	-21.8807		0.62223	-21.6937	0.622	-21.795	0.621866	-7.60047	0.801561	-21.6151		0.08235	-21.4271	0.877066	-6.81742	0.869415	-6.56641	0.883327	-6.88424		0.87366	-21.3386	0.466253	-8.37874	0.466343	-8.54714	0.4665	-8.81762
0.67654	-21.1357	0.507721	-4.55307	0.645398	-22.5196	0.442684	-21.8822		0.67517	-21.6938	0.674899	-21.7942	0.674741	-7.53587	0.872539	-21.6154		0.12352	-21.428	0.918044	-7.10582	0.912943	-6.74157	0.922218	-7.02828		0.91577	-21.3399	0.512561	-8.41461	0.51265	-8.58279	0.512822	-8.85732
0.72969	-21.1348	0.566775	-4.96211	0.724089	-22.5199	0.5	-21.8833		0.72811	-21.6937	0.727797	-21.7946	0.727616	-7.42993	0.936269	-21.6161		0.1647	-21.429	0.959022	-7.06116	0.956472	-6.74637	0.961109	-7.00472		0.95789	-21.3396	0.55887	-8.32947	0.558958	-8.48903	0.559143	-8.75825
0.77667	-21.136	0.619216	-4.6104	0.791135	-22.5196	0.554676	-21.8814		0.77451	-21.6936	0.774081	-21.7945	0.773832	-7.48767	1	-21.6164		0.20544	-21.4289	1	-6.88336	1	-6.65245	1	-6.7357		1	-21.3397	0.597421	-8.40851	0.597509	-8.57592	0.597706	-8.85015
0.82366	-21.1366	0.671656	-4.40495	0.85818	-22.5185	0.609351	-21.8799		0.82091	-21.6935	0.820365	-21.7942	0.820048	-7.424	0	--		0.24617	-21.4285	0	--	0	--	0	--		0	--	0.635973	-8.40412	0.63606	-8.57332	0.636269	-8.84627
0.87064	-21.1369	0.724096	-4.0874	0.92909	-22.5185	0.664027	-21.8804		0.86731	-21.693	0.86665	-21.7937	0.866263	-7.39534	0	-21.6152		0.28691	-21.4278	0	-6.61261	0	-6.34397	0	-6.4496		0	-21.3392	0.674525	-8.31903	0.674611	-8.48464	0.674831	-8.74951
0.91376	-21.1362	0.768944	-4.37411	1	-22.518	0.718702	-21.883		0.91154	-21.6932	0.9111	-21.7943	0.910842	-7.51383	0.0637306	-21.6145		0.32765	-21.427	0.040978	-6.56309	0.0435284	-6.46484	0.0388911	-6.4206		0.04211	-21.3392	0.713076	-8.17515	0.713162	-8.3322	0.713394	-8.58374
0.95688	-21.1358	0.813793	-4.59904	0	--	0.773378	-21.8857		0.95577	-21.6933	0.95555	-21.7953	0.955421	-7.57926	0.127461	-21.6154		0.37398	-21.4271	0.081956	-6.33918	0.0870568	-6.43062	0.0777823	-6.25509		0.08423	-21.3391	0.753358	-8.20251	0.753515	-8.36294	0.753849	-8.62308
1	-21.1357	0.858641	-4.94579	0	-22.5176	0.828053	-21.8872		1	-21.6934	1	-21.7966	1	-7.57568	0.195238	-21.6147		0.42032	-21.4269	0.122934	-6.40002	0.130585	-5.96703	0.116673	-6.36058		0.12634	-21.3384	0.793641	-8.11236	0.793867	-8.26744	0.794304	-8.52606
0	--	0.905761	-4.48677	0.0709098	-22.5179	0.885369	-21.8844		0	--	0	--	0	--	0.263015	-21.6131		0.46666	-21.4265	0.163912	-6.05317	0.174114	-5.42984	0.155565	-6.46102		0.16845	-21.3385	0.833923	-7.93052	0.83422	-8.0617	0.834759	-8.30996
0	-21.1356	0.95288	-4.85171	0.14182	-22.5185	0.942684	-21.881		0	-21.6933	0	-21.7966	0	-7.57551	0.330792	-21.6143		0.51299	-21.426	0.204886	-6.05523	0.211924	-5.66062	0.198981	-6.43721		0.22124	-21.3386	0.875442	-8.0965	0.875665	-8.24606	0.87607	-8.50343
0.04312	-21.1358	1	-4.96211	0.236109	-22.5203	1	-21.879		0.04423	-21.6932	0.0444501	-21.7953	0.0445789	-7.50147	0.410782	-21.6135		0.55933	-21.426	0.245861	-6.12497	0.249735	-5.94768	0.242397	-6.36935		0.27403	-21.3389	0.916961	-8.22506	0.91711	-8.38032	0.91738	-8.64441
0.08624	-21.1362	0	--	0.330399	-22.5187	0	--		0.08846	-21.6931	0.0889002	-21.7943	0.0891577	-7.49247	0.490773	-21.6142		0.61076	-21.4261	0.286835	-6.27285	0.287546	-6.23605	0.285813	-6.27579		0.32682	-21.3391	0.958481	-8.30325	0.958555	-8.46175	0.95869	-8.72972
0.12936	-21.1369	0	-4.41039	0.409169	-22.5198	0	-21.879		0.13269	-21.693	0.13335	-21.7937	0.133737	-7.39531	0.570763	-21.6152		0.6622	-21.4266	0.32781	-6.19095	0.325357	-6.27801	0.329229	-6.15		0.37306	-21.338	1	-8.32947	1	-8.48903	1	-8.75825
0.17972	-21.1363	0.0471196	-4.61625	0.487938	-22.5181	0.0546755	-21.878		0.18222	-21.6935	0.182718	-21.7943	0.183007	-7.38301	0.650673	-21.6142		0.71363	-21.427	0.366441	-6.45223	0.363794	-6.37959	0.368085	-6.33037		0.4193	-21.3387	0	--	0	--	0	--
0.23009	-21.1352	0.0942392	-4.48215	0.566708	-22.5176	0.109351	-21.8757		0.23176	-21.6937	0.232086	-21.7949	0.232277	-7.40662	0.730584	-21.6135		0.75419	-21.4278	0.405072	-6.67457	0.402231	-6.55794	0.406941	-6.54008		0.46554	-21.3394	0	-8.32248	0	-8.48477	0	-8.75358
0.28045	-21.1338	0.141359	-3.95523	0.645398	-22.5181	0.164027	-21.8738		0.28129	-21.6935	0.281454	-21.795	0.281547	-7.45845	0.801561	-21.6142		0.79475	-21.4285	0.443704	-6.84943	0.440668	-6.74441	0.445797	-6.7647		0.51178	-21.3393	0.0415193	-8.29626	0.0414449	-8.45752	0.0413101	-8.72509
0.33082	-21.1322	0.188659	-4.27444	0.724089	-22.5198	0.218702	-21.8724		0.33083	-21.6934	0.330822	-21.7945	0.330817	-7.49699	0.872539	-21.6154		0.8353	-21.429	0.482335	-6.95271	0.479105	-6.80393	0.484653	-6.90223		0.55802	-21.3392	0.0830387	-8.21803	0.0828899	-8.37615	0.0826203	-8.63989
0.3787	-21.1333	0.235958	-4.12693	0.791135	-22.5192	0.273378	-21.8751		0.37852	-21.6936	0.378478	-21.7947	0.378452	-7.38483	0.936269	-21.6145		0.87648	-21.428	0.520967	-6.7579	0.517542	-6.53917	0.523509	-6.6146		0.60935	-21.3393	0.124558	-8.08952	0.124335	-8.24202	0.12393	-8.49912
0.42658	-21.1341	0.283258	-3.53074	0.85818	-22.5185	0.328053	-21.8798		0.42621	-21.6937	0.426134	-21.7944	0.426087	-7.41736	1	-21.6152		0.91765	-21.4271	0.559598	-6.61261	0.555979	-6.34397	0.562365	-6.4496		0.66068	-21.3393	0.166077	-7.92774	0.16578	-8.06153	0.165241	-8.30786
0.47447	-21.1347	0.330558	-2.91659	0.92909	-22.5179	0.385369	-21.8782		0.47391	-21.6937	0.47379	-21.794	0.473722	-7.43542	0	--		0.95883	-21.4262	0.598191	-6.75763	0.594377	-6.53887	0.601182	-6.6143		0.71201	-21.3387	0.20639	-8.02081	0.20619	-8.18816	0.205814	-8.44117
0.52235	-21.1352	0.389612	-3.65455	1	-22.5176	0.442684	-21.8759		0.5216	-21.6937	0.521446	-21.795	0.521357	-7.5208	0	-21.6151		1	-21.426	0.636783	-6.95275	0.632776	-6.80362	0.64	-6.90222		0.75185	-21.3382	0.246703	-8.03725	0.2466	-8.20763	0.246388	-8.45697
0.57023	-21.1356	0.448667	-3.96141	0	--	0.5	-21.874		0.56929	-21.6933	0.569102	-21.7966	0.568992	-7.57551	0.0637306	-21.6143		0	--	0.675376	-6.84987	0.671174	-6.74532	0.678817	-6.76522		0.7917	-21.3387	0.287015	-7.97076	0.28701	-8.13569	0.286962	-8.37319
0.62338	-21.1352	0.507721	-4.4306	0	-22.5173	0.554676	-21.8781		0.62223	-21.6937	0.622	-21.7948	0.621866	-7.51282	0.127461	-21.6154		0	-21.4256	0.713969	-6.67537	0.709573	-6.55814	0.717634	-6.541		0.83155	-21.3385	0.327328	-7.88057	0.32742	-8.01304	0.327536	-8.23695
0.67654	-21.1346	0.566775	-4.41039	0.0709098	-22.5168	0.609351	-21.8791		0.67517	-21.6937	0.674899	-21.7941	0.674741	-7.41305	0.195238	-21.6146		0.04117	-21.426	0.754675	-6.50939	0.748344	-6.39795	0.759901	-6.535		0.87366	-21.3384	0.373636	-7.89024	0.373728	-8.02932	0.373857	-8.26015
0.72969	-21.1338	0.619216	-4.43788	0.14182	-22.5166	0.664027	-21.8746		0.72811	-21.6937	0.727797	-21.7946	0.727616	-7.38342	0.263015	-21.6125		0.08235	-21.4258	0.795382	-6.29405	0.787115	-5.87531	0.802168	-6.46242		0.91577	-21.3391	0.419944	-7.89159	0.420035	-8.01741	0.420179	-8.24208
0.77667	-21.1351	0.671656	-4.10498	0.236109	-22.5165	0.718702	-21.8706		0.77451	-21.6935	0.774081	-21.7944	0.773832	-7.39727	0.330792	-21.6142		0.12352	-21.4256	0.836088	-6.05317	0.825886	-5.42984	0.844435	-6.46102		0.95789	-21.3392	0.466253	-7.99397	0.466343	-8.12127	0.4665	-8.35418
0.82366	-21.1361	0.724096	-3.89549	0.330399	-22.5183	0.773378	-21.8672		0.82091	-21.6934	0.820365	-21.7941	0.820048	-7.40704	0.410782	-21.6121		0.1647	-21.4253	0.877066	-6.40002	0.869415	-5.96703	0.883327	-6.36058		1	-21.3392	0.512561	-8.12013	0.51265	-8.2687	0.512822	-8.52496
0.87064	-21.1369	0.768944	-4.07805	0.409169	-22.5169	0.828053	-21.8649		0.86731	-21.693	0.86665	-21.7937	0.866263	-7.39531	0.490773	-21.6137		0.20544	-21.4251	0.918044	-6.33918	0.912943	-6.43062	0.922218	-6.25509		0	--	0.55887	-8.32248	0.558958	-8.48477	0.559143	-8.75358
0.91376	-21.1362	0.813793	-4.43358	0.487938	-22.5164	0.885369	-21.8695		0.91154	-21.6931	0.9111	-21.7943	0.910842	-7.49247	0.570763	-21.6151		0.24617	-21.4252	0.959022	-6.56309	0.956472	-6.46484	0.961109	-6.4206		0	-21.3387	0.597421	-8.16196	0.597509	-8.31288	0.597706	-8.57166
0.95688	-21.1358	0.858641	-3.95523	0.566708	-22.5173	0.942684	-21.8749		0.95577	-21.6932	0.95555	-21.7953	0.955421	-7.50147	0.650673	-21.6137		0.28691	-21.4261	1	-6.61261	1	-6.34397	1	-6.4496		0.04211	-21.3391	0.635973	-8.02032	0.63606	-8.14769	0.636269	-8.38283
1	-21.1356	0.905761	-4.48215	0.645398	-22.5164	1	-21.879		1	-21.6933	1	-21.7966	1	-7.57551	0.730584	-21.6121		0.32765	-21.427	0	--	0	--	0	--		0.08423	-21.3386	0.674525	-7.94436	0.674611	-8.07111	0.674831	-8.30008
0	--	0.95288	-4.61625	0.724089	-22.5169	0	--		0	--	0	--	0	--	0.801561	-21.6141		0.37398	-21.4266	0	-6.6012	0	-6.33443	0	-6.43744		0.12634	-21.338	0.713076	-7.86288	0.713162	-7.98722	0.713394	-8.20905
0	-21.1282	1	-4.41039	0.791135	-22.5164	0	-21.8711		0	-21.6933	0	-21.7937	0	-7.56308	0.872539	-21.6154		0.42032	-21.426	0.040978	-6.55097	0.0435284	-6.38769	0.0388911	-6.40663		0.16845	-21.3384	0.753358	-7.88805	0.753515	-8.03164	0.753849	-8.27272
0.04312	-21.1281	0	--	0.85818	-22.5166	0.0546755	-21.8698		0.04423	-21.6932	0.0444501	-21.7936	0.0445789	-7.50098	0.936269	-21.6143		0.46666	-21.4255	0.081956	-6.32886	0.0870568	-6.30824	0.0777823	-6.24262		0.22124	-21.3385	0.793641	-7.93442	0.793867	-8.08203	0.794304	-8.33008
0.08624	-21.1278	0	-4.40039	0.92909	-22.5168	0.109351	-21.867		0.08846	-21.6931	0.0889002	-21.7935	0.0891577	-7.36623	1	-21.6151		0.51299	-21.4259	0.122934	-5.92741	0.130585	-5.93454	0.116673	-5.90746		0.27403	-21.3389	0.833923	-7.92774	0.83422	-8.06153	0.834759	-8.30786
0.12936	-21.1274	0.0471196	-4.17556	1	-22.5173	0.164027	-21.8649		0.13269	-21.693	0.13335	-21.7936	0.133737	-7.39479	0	--		0.55933	-21.4256	0.163912	-6.0528	0.174114	-5.42967	0.155565	-6.43706		0.32682	-21.3391	0.875442	-8.08952	0.875665	-8.24202	0.87607	-8.49912
0.17972	-21.1279	0.0942392	-4.40185	0	--	0.218702	-21.8696		0.18222	-21.6931	0.182718	-21.7935	0.183007	-7.34792	0	-21.6133		0.61076	-21.4258	0.204886	-6.05459	0.211924	-5.65873	0.198981	-6.413		0.37306	-21.3378	0.916961	-8.21803	0.91711	-8.37615	0.91738	-8.63989
0.23009	-21.129	0.141359	-3.95501	0	-22.5165	0.273378	-21.8715		0.23176	-21.6932	0.232086	-21.7937	0.232277	-7.30951	0.0637306	-21.6142		0.6622	-21.4255	0.245861	-6.12418	0.249735	-5.94539	0.242397	-6.34472		0.4193	-21.3384	0.958481	-8.29626	0.958555	-8.45752	0.95869	-8.72509
0.28045	-21.1305	0.188659	-4.27181	0.0709098	-22.516	0.328053	-21.8718		0.28129	-21.6933	0.281454	-21.794	0.281547	-7.19407	0.127461	-21.6153		0.71363	-21.4262	0.286835	-6.27235	0.287546	-6.23195	0.285813	-6.26546		0.46554	-21.3389	1	-8.32248	1	-8.48477	1	-8.75358
0.33082	-21.1322	0.235958	-4.12572	0.14182	-22.5166	0.385369	-21.8715		0.33083	-21.6934	0.330822	-21.7944	0.330817	-7.09511	0.195238	-21.6146		0.75419	-21.4251	0.32781	-6.19091	0.325357	-6.27778	0.329229	-6.14983		0.51178	-21.3389	0	--	0	--	0	--
0.3787	-21.1309	0.283258	-3.52922	0.236109	-22.5163	0.442684	-21.8725		0.37852	-21.6931	0.378478	-21.7941	0.378452	-7.27121	0.263015	-21.6124		0.79475	-21.4253	0.366441	-6.19062	0.363794	-6.2467	0.368085	-6.13063		0.55802	-21.3387	0	-7.98981	0	-8.1105	0	-8.34879
0.42658	-21.1297	0.330558	-2.91635	0.330399	-22.5183	0.5	-21.8739		0.42621	-21.693	0.426134	-21.7939	0.426087	-7.32537	0.330792	-21.6142		0.8353	-21.4253	0.405072	-6.16308	0.402231	-6.16205	0.406941	-6.06616		0.60935	-21.339	0.0415193	-8.06122	0.0414449	-8.18879	0.0413101	-8.42701
0.47447	-21.1288	0.389612	-3.35341	0.409169	-22.5167	0.554676	-21.8702		0.47391	-21.693	0.47379	-21.7938	0.473722	-7.38636	0.410782	-21.6116		0.87648	-21.4256	0.443704	-6.05442	0.440668	-6.01444	0.445797	-5.94088		0.66068	-21.3388	0.0830387	-7.99355	0.0828899	-8.12116	0.0826203	-8.35252
0.52235	-21.1283	0.448667	-3.59212	0.487938	-22.5164	0.609351	-21.8696		0.5216	-21.6931	0.521446	-21.7937	0.521357	-7.48341	0.490773	-21.613		0.91765	-21.4258	0.482335	-5.91687	0.479105	-5.87201	0.484653	-5.81811		0.71201	-21.3383	0.124558	-7.81818	0.124335	-7.94056	0.12393	-8.16014
0.57023	-21.1282	0.507721	-4.06788	0.566708	-22.5165	0.664027	-21.8695		0.56929	-21.6933	0.569102	-21.7937	0.568992	-7.56308	0.570763	-21.6133		0.95883	-21.426	0.520967	-6.3996	0.517542	-6.20903	0.523509	-6.26592		0.75185	-21.3381	0.166077	-7.90946	0.16578	-8.05799	0.165241	-8.30591
0.62338	-21.1284	0.566775	-4.40039	0.645398	-22.5164	0.718702	-21.8673		0.62223	-21.6931	0.622	-21.7937	0.621866	-7.47344	0.650673	-21.613		1	-21.4256	0.559598	-6.6012	0.555979	-6.33443	0.562365	-6.43744		0.7917	-21.3377	0.20639	-7.71494	0.20619	-7.83101	0.205814	-8.06343
0.67654	-21.129	0.619216	-4.12129	0.724089	-22.5167	0.773378	-21.8646		0.67517	-21.693	0.674899	-21.7938	0.674741	-7.38983	0.730584	-21.6116		0	--	0.598191	-6.39997	0.594377	-6.20926	0.601182	-6.26626		0.83155	-21.3384	0.246703	-7.67958	0.2466	-7.78099	0.246388	-7.98795
0.72969	-21.13	0.671656	-3.62599	0.791135	-22.516	0.828053	-21.8648		0.72811	-21.693	0.727797	-21.7939	0.727616	-7.29723	0.801561	-21.614		0	-21.4254	0.636783	-5.91801	0.632776	-5.87287	0.64	-5.81918		0.87366	-21.338	0.287015	-7.77555	0.28701	-7.88395	0.286962	-8.09667
0.77667	-21.1288	0.724096	-3.51235	0.85818	-22.5166	0.885369	-21.8655		0.77451	-21.6934	0.774081	-21.7937	0.773832	-7.3831	0.872539	-21.6153		0.04117	-21.425	0.675376	-6.054	0.671174	-6.0139	0.678817	-5.94041		0.91577	-21.3386	0.327328	-7.86054	0.32742	-8.01301	0.327536	-8.23667
0.82366	-21.1279	0.768944	-4.06608	0.92909	-22.516	0.942684	-21.8691		0.82091	-21.6932	0.820365	-21.7935	0.820048	-7.3666	0.936269	-21.6142		0.08235	-21.4248	0.713969	-6.16279	0.709573	-6.16159	0.717634	-6.06578		0.95789	-21.3391	0.373636	-7.82658	0.373728	-7.95298	0.373857	-8.17218
0.87064	-21.1274	0.813793	-4.03292	1	-22.5165	1	-21.8711		0.86731	-21.693	0.86665	-21.7936	0.866263	-7.39479	1	-21.6133		0.12352	-21.4249	0.754675	-6.3359	0.748344	-6.00141	0.759901	-6.29619		1	-21.3387	0.419944	-7.77095	0.420035	-7.90541	0.420179	-8.135
0.91376	-21.1278	0.858641	-3.95501	0	--	0	--		0.91154	-21.6931	0.9111	-21.7935	0.910842	-7.36623	0	--		0.1647	-21.4253	0.795382	-6.01941	0.787115	-5.71146	0.802168	-6.21216		0	--	0.466253	-7.81924	0.466343	-7.95174	0.4665	-8.19032
0.95688	-21.1281	0.905761	-4.40185	0	-22.5161	0	-21.871		0.95577	-21.6932	0.95555	-21.7936	0.955421	-7.50098	0	-21.6133		0.20544	-21.4251	0.836088	-6.0528	0.825886	-5.42967	0.844435	-6.43706		0	-21.3386	0.512561	-8.04459	0.51265	-8.17101	0.512822	-8.40915
1	-21.1282	0.95288	-4.17556	0.0709098	-22.5158	0.0546755	-21.8697		1	-21.6933	1	-21.7937	1	-7.56308	0.0637306	-21.6136		0.24617	-21.4252	0.877066	-5.92741	0.869415	-5.93454	0.883327	-5.90746		0.04211	-21.3383	0.55887	-7.98981	0.558958	-8.1105	0.559143	-8.34879
0	--	1	-4.40039	0.14182	-22.5151	0.109351	-21.8669		0	--	0	--	0	--	0.127461	-21.6134		0.28691	-21.4261	0.918044	-6.32886	0.912943	-6.30824	0.922218	-6.24262		0.08423	-21.3376	0.597421	-8.04354	0.597509	-8.16942	0.597706	-8.40797
0	-21.1266	0	--	0.236109	-22.5152	0.164027	-21.8642		0	-21.6933	0	-21.7935	0	-7.56258	0.195238	-21.6128		0.32765	-21.427	0.959022	-6.55097	0.956472	-6.38769	0.961109	-6.40663		0.12634	-21.3378	0.635973	-7.92884	0.63606	-8.06711	0.636269	-8.31207
0.04312	-21.1267	0	-3.48144	0.330399	-22.5144	0.218702	-21.8661		0.04423	-21.6931	0.0444501	-21.7936	0.0445789	-7.41925	0.263015	-21.6115		0.37398	-21.4259	1	-6.6012	1	-6.33443	1	-6.43744		0.16845	-21.3369	0.674525	-7.66658	0.674611	-7.79343	0.674831	-8.01806
0.08624	-21.127	0.0471196	-3.60198	0.409169	-22.5152	0.273378	-21.8697		0.08846	-21.6929	0.0889002	-21.7935	0.0891577	-7.36567	0.330792	-21.6141		0.42032	-21.4252	0	--	0	--	0	--		0.22124	-21.3368	0.713076	-7.82252	0.713162	-7.96096	0.713394	-8.19252
0.12936	-21.1274	0.0942392	-3.94016	0.487938	-22.5157	0.328053	-21.8717		0.13269	-21.693	0.13335	-21.7936	0.133737	-7.39472	0.410782	-21.6115		0.46666	-21.4254	0	-5.41518	0	-5.63394	0	-5.32722		0.27403	-21.3366	0.753358	-7.80174	0.753515	-7.9256	0.753849	-8.14327
0.17972	-21.1279	0.141359	-3.94938	0.566708	-22.5161	0.385369	-21.8705		0.18222	-21.6931	0.182718	-21.7935	0.183007	-7.34786	0.490773	-21.6123		0.51299	-21.425	0.040978	-5.80372	0.0435284	-5.64954	0.0388911	-5.67374		0.32682	-21.3365	0.793641	-7.80865	0.793867	-7.94168	0.794304	-8.18034
0.23009	-21.129	0.188659	-3.61072	0.645398	-22.5157	0.442684	-21.8676		0.23176	-21.6932	0.232086	-21.7937	0.232277	-7.30946	0.570763	-21.6133		0.55933	-21.4254	0.081956	-6.1494	0.0870568	-6.04515	0.0777823	-6.04607		0.37306	-21.3376	0.833923	-7.90946	0.83422	-8.05799	0.834759	-8.30591
0.28045	-21.1305	0.235958	-3.26298	0.724089	-22.5152	0.5	-21.8647		0.28129	-21.6933	0.281454	-21.794	0.281547	-7.19403	0.650673	-21.6123		0.61076	-21.425	0.122934	-5.91906	0.130585	-5.84143	0.116673	-5.89964		0.4193	-21.338	0.875442	-7.81818	0.875665	-7.94056	0.87607	-8.16014
0.33082	-21.1322	0.283258	-3.07192	0.791135	-22.5154	0.554676	-21.8674		0.33083	-21.6934	0.330822	-21.7944	0.330817	-7.09508	0.730584	-21.6115		0.6622	-21.4254	0.163912	-5.37154	0.174114	-5.376	0.155565	-5.42861		0.46554	-21.3381	0.916961	-7.99355	0.91711	-8.12116	0.91738	-8.35252
0.3787	-21.1308	0.330558	-2.91199	0.85818	-22.5151	0.609351	-21.8695		0.37852	-21.6931	0.378478	-21.7941	0.378452	-7.19969	0.801561	-21.6131		0.71363	-21.4254	0.204886	-5.80645	0.211924	-5.56856	0.198981	-5.90335		0.51178	-21.3384	0.958481	-8.06122	0.958555	-8.18879	0.95869	-8.42701
0.42658	-21.1294	0.389612	-3.28148	0.92909	-22.5158	0.664027	-21.8694		0.42621	-21.6929	0.426134	-21.7939	0.426087	-7.28149	0.872539	-21.6134		0.75419	-21.4251	0.245861	-6.07184	0.249735	-5.92012	0.242397	-6.21714		0.55802	-21.3386	1	-7.98981	1	-8.1105	1	-8.34879
0.47447	-21.128	0.448667	-3.58232	1	-22.5161	0.718702	-21.8672		0.47391	-21.6929	0.47379	-21.7937	0.473722	-7.38287	0.936269	-21.6136		0.79475	-21.425	0.286835	-6.12601	0.287546	-6.14881	0.285813	-6.2651		0.60935	-21.3384	0	--	0	--	0	--
0.52235	-21.1269	0.507721	-3.4536	0	--	0.773378	-21.8645		0.5216	-21.6931	0.521446	-21.7936	0.521357	-7.44102	1	-21.6133		0.8353	-21.4253	0.32781	-6.19067	0.325357	-6.27505	0.329229	-6.14254		0.66068	-21.3379	0	-7.98822	0	-8.11005	0	-8.34833
0.57023	-21.1266	0.566775	-3.48144	0	-22.5156	0.828053	-21.8622		0.56929	-21.6933	0.569102	-21.7935	0.568992	-7.56258	0	--		0.87648	-21.4249	0.366441	-6.1905	0.363794	-6.22515	0.368085	-6.08403		0.71201	-21.3377	0.0415193	-7.7745	0.0414449	-7.88376	0.0413101	-8.11544
0.62338	-21.127	0.619216	-3.46107	0.0709098	-22.5156	0.885369	-21.8654		0.62223	-21.6931	0.622	-21.7937	0.621866	-7.42074	0	-21.6127		0.91765	-21.4248	0.405072	-6.16304	0.402231	-6.02549	0.406941	-5.97319		0.75185	-21.3377	0.0830387	-7.45122	0.0828899	-7.56394	0.0826203	-7.77743
0.67654	-21.1283	0.671656	-3.57774	0.14182	-22.5151	0.942684	-21.869		0.67517	-21.6929	0.674899	-21.7937	0.674741	-7.36358	0.0637306	-21.6135		0.95883	-21.425	0.443704	-6.0543	0.440668	-5.93553	0.445797	-5.85418		0.7917	-21.3376	0.124558	-7.70071	0.124335	-7.83128	0.12393	-8.06453
0.72969	-21.1299	0.724096	-3.47096	0.236109	-22.5152	1	-21.871		0.72811	-21.6929	0.727797	-21.7939	0.727616	-7.28512	0.127461	-21.6133		1	-21.4254	0.482335	-5.88581	0.479105	-5.80615	0.484653	-5.75997		0.83155	-21.3369	0.166077	-7.89814	0.16578	-8.05756	0.165241	-8.30387
0.77667	-21.1286	0.768944	-3.68522	0.330399	-22.5144	0	--		0.77451	-21.6934	0.774081	-21.7937	0.773832	-7.28548	0.195238	-21.6127		0	--	0.520967	-5.6691	0.517542	-5.54305	0.523509	-5.52949		0.87366	-21.3378	0.20639	-7.69438	0.20619	-7.83073	0.205814	-8.06131
0.82366	-21.1277	0.813793	-3.83354	0.409169	-22.515	0	-21.8581		0.82091	-21.6932	0.820365	-21.7935	0.820048	-7.34768	0.263015	-21.6114		0	-21.4244	0.559598	-5.41518	0.555979	-5.63394	0.562365	-5.32722		0.91577	-21.3376	0.246703	-7.64201	0.2466	-7.78054	0.246388	-7.9874
0.87064	-21.1274	0.858641	-3.94938	0.487938	-22.5156	0.0546755	-21.8589		0.86731	-21.693	0.86665	-21.7936	0.866263	-7.39472	0.330792	-21.6141		0.04117	-21.4243	0.598191	-5.66886	0.594377	-5.54277	0.601182	-5.52923		0.95789	-21.3383	0.287015	-7.73795	0.28701	-7.88349	0.286962	-8.09585
0.91376	-21.127	0.905761	-3.94016	0.566708	-22.5156	0.109351	-21.8613		0.91154	-21.6929	0.9111	-21.7935	0.910842	-7.36567	0.410782	-21.6112		0.08235	-21.4241	0.636783	-5.88543	0.632776	-5.80567	0.64	-5.75956		1	-21.3386	0.327328	-7.85303	0.32742	-8.01168	0.327536	-8.2346
0.95688	-21.1267	0.95288	-3.60198	0.645398	-22.5156	0.164027	-21.8641		0.95577	-21.6931	0.95555	-21.7936	0.955421	-7.41925	0.490773	-21.6121		0.12352	-21.4238	0.675376	-6.05387	0.671174	-5.93512	0.678817	-5.8537		0	--	0.373636	-7.73845	0.373728	-7.87032	0.373857	-8.08132
1	-21.1266	1	-3.48144	0.724089	-22.515	0.218702	-21.866		1	-21.6933	1	-21.7935	1	-7.56258	0.570763	-21.6127		0.1647	-21.4236	0.713969	-6.16275	0.709573	-6.02511	0.717634	-5.97287		0	-21.337	0.419944	-7.51771	0.420035	-7.63588	0.420179	-7.83164
0	--	0	--	0.791135	-22.5152	0.273378	-21.8697		0	--	0	--	0	--	0.650673	-21.6121		0.20544	-21.4244	0.754675	-5.85741	0.748344	-5.80049	0.759901	-5.92499		0.04211	-21.3371	0.466253	-7.53551	0.466343	-7.65496	0.4665	-7.87167
0	-21.1264	0	-3.35772	0.85818	-22.5151	0.328053	-21.8712		0	-21.693	0	-21.793	0	-7.34909	0.730584	-21.6112		0.24617	-21.4247	0.795382	-5.77697	0.787115	-5.48992	0.802168	-6.08223		0.08423	-21.3376	0.512561	-7.8129	0.51265	-7.92411	0.512822	-8.15658
0.04312	-21.1265	0.0471196	-3.4659	0.92909	-22.5156	0.385369	-21.8704		0.04423	-21.693	0.0444501	-21.793	0.0445789	-7.39229	0.801561	-21.6127		0.28691	-21.4242	0.836088	-5.37154	0.825886	-5.376	0.844435	-5.42861		0.12634	-21.3374	0.55887	-7.98822	0.558958	-8.11005	0.559143	-8.34833
0.08624	-21.1263	0.0942392	-3.52972	1	-22.5156	0.442684	-21.8676		0.08846	-21.6928	0.0889002	-21.7933	0.0891577	-7.25331	0.872539	-21.6133		0.32765	-21.4234	0.877066	-5.91906	0.869415	-5.84143	0.883327	-5.89964		0.16845	-21.3368	0.597421	-7.85045	0.597509	-7.9637	0.597706	-8.19755
0.12936	-21.1261	0.141359	-3.94933	0	--	0.5	-21.8647		0.13269	-21.693	0.13335	-21.7936	0.133737	-7.1919	0.936269	-21.6135		0.37398	-21.4242	0.918044	-6.1494	0.912943	-6.04515	0.922218	-6.04607		0.22124	-21.3367	0.635973	-7.63558	0.63606	-7.7372	0.636269	-7.96242
0.17972	-21.1266	0.188659	-3.60751	0	-22.5155	0.554676	-21.8673		0.18222	-21.6931	0.182718	-21.7934	0.183007	-7.3231	1	-21.6127		0.42032	-21.425	0.959022	-5.80372	0.956472	-5.64954	0.961109	-5.67374		0.27403	-21.3365	0.674525	-7.64234	0.674611	-7.76693	0.674831	-7.99511
0.23009	-21.1279	0.235958	-3.25954	0.0709098	-22.5152	0.609351	-21.867		0.23176	-21.6931	0.232086	-21.7936	0.232277	-7.2635	0	--		0.46666	-21.4248	1	-5.41518	1	-5.63394	1	-5.32722		0.32682	-21.3364	0.713076	-7.59836	0.713162	-7.72055	0.713394	-7.92161
0.28045	-21.13	0.283258	-3.07173	0.14182	-22.5147	0.664027	-21.8648		0.28129	-21.6933	0.281454	-21.7939	0.281547	-7.17134	0	-21.6126		0.51299	-21.4248	0	--	0	--	0	--		0.37306	-21.3376	0.753358	-7.6094	0.753515	-7.72946	0.753849	-7.95429
0.33082	-21.1322	0.330558	-2.9119	0.236109	-22.5139	0.718702	-21.8636		0.33083	-21.6933	0.330822	-21.7944	0.330817	-7.09504	0.0637306	-21.6125		0.55933	-21.4244	0	-5.41361	0	-5.38838	0	-5.28436		0.4193	-21.3375	0.793641	-7.69982	0.793867	-7.81858	0.794304	-8.03033
0.3787	-21.1304	0.389612	-3.15036	0.330399	-22.5143	0.773378	-21.8636		0.37852	-21.6929	0.378478	-21.7939	0.378452	-7.18037	0.127461	-21.6132		0.61076	-21.4248	0.040978	-5.39844	0.0435284	-5.59275	0.0388911	-5.14143		0.46554	-21.3376	0.833923	-7.89814	0.83422	-8.05756	0.834759	-8.30387
0.42658	-21.1288	0.448667	-3.47999	0.409169	-22.5148	0.828053	-21.8622		0.42621	-21.6925	0.426134	-21.7935	0.426087	-7.25151	0.195238	-21.6124		0.6622	-21.4249	0.081956	-5.34988	0.0870568	-5.47384	0.0777823	-5.22659		0.51178	-21.3371	0.875442	-7.70071	0.875665	-7.83128	0.87607	-8.06453
0.47447	-21.1275	0.507721	-3.32748	0.487938	-22.5153	0.885369	-21.8612		0.47391	-21.692	0.47379	-21.7936	0.473722	-7.22374	0.263015	-21.6107		0.71363	-21.4247	0.122934	-5.39158	0.130585	-5.31195	0.116673	-5.88676		0.55802	-21.337	0.916961	-7.45122	0.91711	-7.56394	0.91738	-7.77743
0.52235	-21.1267	0.566775	-3.35772	0.566708	-22.5155	0.942684	-21.8589		0.5216	-21.6925	0.521446	-21.7936	0.521357	-7.35819	0.330792	-21.6117		0.75419	-21.4249	0.163912	-5.37114	0.174114	-5.37586	0.155565	-5.42471		0.60935	-21.3371	0.958481	-7.7745	0.958555	-7.88376	0.95869	-8.11544
0.57023	-21.1264	0.619216	-3.27218	0.645398	-22.5153	1	-21.8581		0.56929	-21.693	0.569102	-21.793	0.568992	-7.34909	0.410782	-21.6111		0.79475	-21.4243	0.204886	-5.80541	0.211924	-5.56475	0.198981	-5.89869		0.66068	-21.3377	1	-7.98822	1	-8.11005	1	-8.34833
0.62338	-21.1267	0.671656	-3.41004	0.724089	-22.5148	0	--		0.62223	-21.6924	0.622	-21.7936	0.621866	-7.36023	0.490773	-21.6115		0.8353	-21.4236	0.245861	-6.07075	0.249735	-5.91457	0.242397	-6.21234		0.71201	-21.3372	0	--	0	--	0	--
0.67654	-21.1277	0.724096	-3.22198	0.791135	-22.5144	0	-21.8573		0.67517	-21.6922	0.674899	-21.7933	0.674741	-7.16742	0.570763	-21.6126		0.87648	-21.4238	0.286835	-6.12454	0.287546	-6.14547	0.285813	-6.24255		0.75185	-21.3372	0	-7.11528	0	-7.17637	0	-7.35897
0.72969	-21.1293	0.768944	-3.36662	0.85818	-22.5147	0.0546755	-21.8579		0.72811	-21.6927	0.727797	-21.7936	0.727616	-7.2471	0.650673	-21.6115		0.91765	-21.4241	0.32781	-6.19066	0.325357	-6.2749	0.329229	-6.14242		0.7917	-21.3371	0.0415193	-7.27605	0.0414449	-7.3449	0.0413101	-7.53415
0.77667	-21.1276	0.813793	-3.6365	0.92909	-22.5152	0.109351	-21.8597		0.77451	-21.6928	0.774081	-21.7935	0.773832	-7.26102	0.730584	-21.6111		0.95883	-21.4243	0.366441	-5.99133	0.363794	-6.20458	0.368085	-6.04421		0.83155	-21.3368	0.0830387	-7.44523	0.0828899	-7.56181	0.0826203	-7.77461
0.82366	-21.1265	0.858641	-3.94933	1	-22.5155	0.164027	-21.8625		0.82091	-21.6929	0.820365	-21.7935	0.820048	-7.30216	0.801561	-21.6124		1	-21.4244	0.405072	-5.68619	0.402231	-5.91069	0.406941	-5.70167		0.87366	-21.3374	0.124558	-7.69422	0.124335	-7.82809	0.12393	-8.06101
0.87064	-21.1261	0.905761	-3.52972	0	--	0.218702	-21.8619		0.86731	-21.693	0.86665	-21.7936	0.866263	-7.1919	0.872539	-21.6132		0	--	0.443704	-5.40602	0.440668	-5.5486	0.445797	-5.30324		0.91577	-21.3376	0.166077	-7.59721	0.16578	-7.69685	0.165241	-7.90224
0.91376	-21.1263	0.95288	-3.4659	0	-22.5147	0.273378	-21.8604		0.91154	-21.6928	0.9111	-21.7933	0.910842	-7.25331	0.936269	-21.6125		0	-21.4244	0.482335	-5.88563	0.479105	-5.74885	0.484653	-5.66501		0.95789	-21.3371	0.20639	-7.61617	0.20619	-7.71773	0.205814	-7.92328
0.95688	-21.1265	1	-3.35772	0.0709098	-22.5148	0.328053	-21.8599		0.95577	-21.693	0.95555	-21.793	0.955421	-7.39229	1	-21.6126		0.04117	-21.4243	0.520967	-5.66886	0.517542	-5.49251	0.523509	-5.42486		1	-21.337	0.246703	-7.4266	0.2466	-7.52712	0.246388	-7.73768
1	-21.1264	0	--	0.14182	-22.5147	0.385369	-21.8604		1	-21.693	1	-21.793	1	-7.34909	0	--		0.08235	-21.424	0.559598	-5.41361	0.555979	-5.38838	0.562365	-5.28436		0	--	0.287015	-7.10664	0.28701	-7.1833	0.286962	-7.36689
0	--	0	-2.82494	0.236109	-22.5138	0.442684	-21.8621		0	--	0	--	0	--	0	-21.6126		0.12352	-21.4237	0.598191	-5.66862	0.594377	-5.49223	0.601182	-5.4246		0	-21.3369	0.327328	-6.84687	0.32742	-6.8953	0.327536	-7.06918
0	-21.1264	0.0471196	-3.40282	0.330399	-22.5143	0.5	-21.8646		0	-21.693	0	-21.793	0	-7.08608	0.0637306	-21.6125		0.1647	-21.4236	0.636783	-5.88524	0.632776	-5.7484	0.64	-5.66457		0.04211	-21.3367	0.373636	-7.08111	0.373728	-7.16826	0.373857	-7.35764
0.04312	-21.1262	0.0942392	-3.41	0.409169	-22.5135	0.554676	-21.8622		0.04423	-21.6929	0.0444501	-21.793	0.0445789	-7.13374	0.127461	-21.6132		0.20544	-21.4243	0.675376	-5.40543	0.671174	-5.54751	0.678817	-5.30204		0.08423	-21.3363	0.419944	-7.45496	0.420035	-7.56814	0.420179	-7.78522
0.08624	-21.1261	0.141359	-3.71722	0.487938	-22.5143	0.609351	-21.8605		0.08846	-21.6928	0.0889002	-21.7932	0.0891577	-7.25267	0.195238	-21.6124		0.24617	-21.4247	0.713969	-5.68501	0.709573	-5.90931	0.717634	-5.70014		0.12634	-21.3367	0.466253	-7.53129	0.466343	-7.6271	0.4665	-7.84754
0.12936	-21.1261	0.188659	-3.52536	0.566708	-22.5147	0.664027	-21.8595		0.13269	-21.693	0.13335	-21.7935	0.133737	-7.19184	0.263015	-21.6107		0.28691	-21.4241	0.754675	-5.56587	0.748344	-5.71863	0.759901	-5.70827		0.16845	-21.3365	0.512561	-7.24017	0.51265	-7.32513	0.512822	-7.51465
0.17972	-21.1266	0.235958	-3.2052	0.645398	-22.5143	0.718702	-21.8595		0.18222	-21.6931	0.182718	-21.7934	0.183007	-7.32303	0.330792	-21.6117		0.32765	-21.4234	0.795382	-5.51826	0.787115	-5.46049	0.802168	-5.60877		0.22124	-21.3364	0.55887	-7.11528	0.558958	-7.17637	0.559143	-7.35897
0.23009	-21.1279	0.283258	-2.9467	0.724089	-22.5135	0.773378	-21.8604		0.23176	-21.6931	0.232086	-21.7936	0.232277	-7.26346	0.410782	-21.611		0.37398	-21.4238	0.836088	-5.37114	0.825886	-5.37586	0.844435	-5.42471		0.27403	-21.3363	0.597421	-7.22543	0.597509	-7.2923	0.597706	-7.47853
0.28045	-21.1299	0.330558	-2.89306	0.791135	-22.5143	0.828053	-21.8621		0.28129	-21.6933	0.281454	-21.7939	0.281547	-7.17131	0.490773	-21.6115		0.42032	-21.4242	0.877066	-5.39158	0.869415	-5.31195	0.883327	-5.88676		0.32682	-21.3363	0.635973	-7.43744	0.63606	-7.5495	0.636269	-7.75902
0.33082	-21.1322	0.389612	-2.97335	0.85818	-22.5147	0.885369	-21.8595		0.33083	-21.6933	0.330822	-21.7944	0.330817	-7.09502	0.570763	-21.6126		0.46666	-21.4246	0.918044	-5.34988	0.912943	-5.47384	0.922218	-5.22659		0.37306	-21.337	0.674525	-7.38808	0.674611	-7.49789	0.674831	-7.68641
0.3787	-21.1304	0.448667	-3.33997	0.92909	-22.5148	0.942684	-21.8579		0.37852	-21.6929	0.378478	-21.7938	0.378452	-7.12054	0.650673	-21.6115		0.51299	-21.4245	0.959022	-5.39844	0.956472	-5.59275	0.961109	-5.14143		0.4193	-21.3368	0.713076	-7.3295	0.713162	-7.43496	0.713394	-7.64349
0.42658	-21.1287	0.507721	-3.11907	1	-22.5147	1	-21.8573		0.42621	-21.6924	0.426134	-21.7933	0.426087	-7.14913	0.730584	-21.611		0.55933	-21.4244	1	-5.41361	1	-5.38838	1	-5.28436		0.46554	-21.3363	0.753358	-7.48886	0.753515	-7.60296	0.753849	-7.79885
0.47447	-21.1273	0.566775	-2.82494	0	--	0	--		0.47391	-21.6919	0.47379	-21.7935	0.473722	-7.15021	0.801561	-21.6121		0.61076	-21.4245	0	--	0	--	0	--		0.51178	-21.3368	0.793641	-7.64762	0.793867	-7.77198	0.794304	-7.99984
0.52235	-21.1264	0.619216	-3.1577	0	-22.5142	0	-21.8573		0.5216	-21.6924	0.521446	-21.7934	0.521357	-7.12592	0.872539	-21.6132		0.6622	-21.4245	0	-5.41222	0	-5.38033	0	-5.22271		0.55802	-21.3369	0.833923	-7.59721	0.83422	-7.69685	0.834759	-7.90224
0.57023	-21.1264	0.671656	-3.37238	0.0709098	-22.5143	0.0546755	-21.8579		0.56929	-21.693	0.569102	-21.793	0.568992	-7.08608	0.936269	-21.6125		0.71363	-21.4241	0.040978	-5.39451	0.0435284	-5.36568	0.0388911	-5.1363		0.60935	-21.3367	0.875442	-7.69422	0.875665	-7.82809	0.87607	-8.06101
0.62338	-21.1264	0.724096	-3.05186	0.14182	-22.5137	0.109351	-21.8597		0.62223	-21.6923	0.622	-21.7935	0.621866	-7.12959	1	-21.6126		0.75419	-21.4246	0.081956	-5.34613	0.0870568	-5.20921	0.0777823	-5.10571		0.66068	-21.3362	0.916961	-7.44523	0.91711	-7.56181	0.91738	-7.77461
0.67654	-21.1275	0.768944	-3.29915	0.236109	-22.5135	0.164027	-21.8625		0.67517	-21.6921	0.674899	-21.7932	0.674741	-7.15235	0	--		0.79475	-21.4243	0.122934	-5.27456	0.130585	-5.18699	0.116673	-5.08		0.71201	-21.3372	0.958481	-7.27605	0.958555	-7.3449	0.95869	-7.53415
0.72969	-21.1292	0.813793	-3.49127	0.330399	-22.5106	0.218702	-21.8618		0.72811	-21.6926	0.727797	-21.7935	0.727616	-7.14263	0	-21.6121		0.8353	-21.4236	0.163912	-5.36405	0.174114	-5.24179	0.155565	-5.41868		0.75185	-21.3371	1	-7.11528	1	-7.17637	1	-7.35897
0.77667	-21.1275	0.858641	-3.71722	0.409169	-22.5132	0.273378	-21.8603		0.77451	-21.6928	0.774081	-21.7934	0.773832	-7.16628	0.0637306	-21.6121		0.87648	-21.4237	0.204886	-5.49306	0.211924	-5.1244	0.198981	-5.2775		0.7917	-21.3366	0	--	0	--	0	--
0.82366	-21.1265	0.905761	-3.41	0.487938	-22.5139	0.328053	-21.8598		0.82091	-21.6929	0.820365	-21.7933	0.820048	-7.25365	0.127461	-21.6105		0.91765	-21.424	0.245861	-5.78478	0.249735	-5.51856	0.242397	-5.58355		0.83155	-21.3365	0	-7.11495	0	-7.17634	0	-7.35745
0.87064	-21.1261	0.95288	-3.40282	0.566708	-22.5142	0.385369	-21.8604		0.86731	-21.693	0.86665	-21.7935	0.866263	-7.19184	0.195238	-21.6092		0.95883	-21.4243	0.286835	-6.03038	0.287546	-5.8518	0.285813	-5.85697		0.87366	-21.3367	0.0415193	-7.18974	0.0414449	-7.27612	0.0413101	-7.46073
0.91376	-21.1261	1	-2.82494	0.645398	-22.5139	0.442684	-21.8621		0.91154	-21.6928	0.9111	-21.7932	0.910842	-7.25267	0.263015	-21.6106		1	-21.4244	0.32781	-6.16847	0.325357	-5.99547	0.329229	-5.97539		0.91577	-21.3363	0.0830387	-7.4382	0.0828899	-7.53155	0.0826203	-7.75204
0.95688	-21.1262	0	--	0.724089	-22.5132	0.5	-21.8646		0.95577	-21.6929	0.95555	-21.793	0.955421	-7.13374	0.330792	-21.6117		0	--	0.366441	-5.99076	0.363794	-5.93113	0.368085	-5.97388		0.95789	-21.3367	0.124558	-7.33058	0.124335	-7.44165	0.12393	-7.63214
1	-21.1264	0	-2.80264	0.791135	-22.5139	0.554676	-21.8622		1	-21.693	1	-21.793	1	-7.08608	0.410782	-21.6106		0	-21.4243	0.405072	-5.59358	0.402231	-5.77633	0.406941	-5.66822		1	-21.3369	0.166077	-7.56154	0.16578	-7.69645	0.165241	-7.9019
0	--	0.0471196	-3.00263	0.85818	-22.5137	0.609351	-21.8605		0	--	0	--	0	--	0.490773	-21.6111		0.04117	-21.4242	0.443704	-5.29314	0.440668	-5.4235	0.445797	-5.25245		0	--	0.20639	-7.58126	0.20619	-7.71733	0.205814	-7.92287
0	-21.1261	0.0942392	-3.33705	0.92909	-22.5143	0.664027	-21.8595		0	-21.693	0	-21.7928	0	-7.08532	0.570763	-21.6121		0.08235	-21.424	0.482335	-5.13406	0.479105	-5.2887	0.484653	-5.11038		0	-21.3369	0.246703	-7.41363	0.2466	-7.5267	0.246388	-7.73548
0.04312	-21.1261	0.141359	-3.71714	1	-22.5142	0.718702	-21.8595		0.04423	-21.6929	0.0444501	-21.793	0.0445789	-7.13302	0.650673	-21.6111		0.12352	-21.4237	0.520967	-5.12878	0.517542	-5.42559	0.523509	-5.18872		0.04211	-21.3366	0.287015	-7.0981	0.28701	-7.18276	0.286962	-7.36465
0.08624	-21.1261	0.188659	-3.52341	0	--	0.773378	-21.8604		0.08846	-21.6928	0.0889002	-21.7932	0.0891577	-7.22535	0.730584	-21.6106		0.1647	-21.4235	0.559598	-5.41222	0.555979	-5.38033	0.562365	-5.22271		0.08423	-21.3361	0.327328	-6.84193	0.32742	-6.8943	0.327536	-7.06792
0.12936	-21.126	0.235958	-3.20509	0	-22.5137	0.828053	-21.8621		0.13269	-21.6927	0.13335	-21.7934	0.133737	-7.19125	0.801561	-21.6096		0.20544	-21.4229	0.598191	-5.12907	0.594377	-5.42565	0.601182	-5.18876		0.12634	-21.3365	0.373636	-7.01996	0.373728	-7.07952	0.373857	-7.24787
0.17972	-21.1257	0.283258	-2.94332	0.0709098	-22.5123	0.885369	-21.8595		0.18222	-21.6918	0.182718	-21.7927	0.183007	-7.00962	0.872539	-21.6105		0.24617	-21.4226	0.636783	-5.13362	0.632776	-5.28909	0.64	-5.11052		0.16845	-21.3365	0.419944	-7.18169	0.420035	-7.2554	0.420179	-7.45509
0.23009	-21.1253	0.330558	-2.89275	0.14182	-22.5137	0.942684	-21.8579		0.23176	-21.6905	0.232086	-21.7917	0.232277	-7.01758	0.936269	-21.6121		0.28691	-21.4229	0.675376	-5.29228	0.671174	-5.42472	0.678817	-5.25405		0.22124	-21.3364	0.466253	-7.26261	0.466343	-7.35968	0.4665	-7.54082
0.28045	-21.1247	0.389612	-2.85668	0.236109	-22.5132	1	-21.8573		0.28129	-21.6891	0.281454	-21.7911	0.281547	-7.04464	1	-21.6121		0.32765	-21.4234	0.713969	-5.59234	0.709573	-5.77485	0.717634	-5.66614		0.27403	-21.3363	0.512561	-7.23087	0.51265	-7.30449	0.512822	-7.49258
0.33082	-21.1242	0.448667	-2.98574	0.330399	-22.5106	0	--		0.33083	-21.6888	0.330822	-21.7911	0.330817	-7.06875	0	--		0.37398	-21.4232	0.754675	-5.56447	0.748344	-5.36842	0.759901	-5.61832		0.32682	-21.3363	0.55887	-7.11495	0.558958	-7.17634	0.559143	-7.35745
0.3787	-21.1247	0.507721	-2.92936	0.409169	-22.5116	0	-21.8135		0.37852	-21.6891	0.378478	-21.7914	0.378452	-7.03603	0	-21.6121		0.42032	-21.4232	0.795382	-5.48112	0.787115	-5.23329	0.802168	-5.28055		0.37306	-21.3367	0.597421	-7.18059	0.597509	-7.26483	0.597706	-7.44921
0.42658	-21.1254	0.566775	-2.80264	0.487938	-22.5123	0.0546755	-21.8133		0.42621	-21.6902	0.426134	-21.7923	0.426087	-7.00918	0.0637306	-21.6116		0.46666	-21.4234	0.836088	-5.36405	0.825886	-5.24179	0.844435	-5.41868		0.4193	-21.3361	0.635973	-7.26672	0.63606	-7.33594	0.636269	-7.52515
0.47447	-21.126	0.619216	-2.91882	0.566708	-22.5137	0.109351	-21.8127		0.47391	-21.6914	0.47379	-21.7931	0.473722	-7.10702	0.127461	-21.6104		0.51299	-21.4241	0.877066	-5.27456	0.869415	-5.18699	0.883327	-5.08		0.46554	-21.3361	0.674525	-7.3591	0.674611	-7.44815	0.674831	-7.65988
0.52235	-21.1264	0.671656	-2.97902	0.645398	-22.5123	0.164027	-21.8118		0.5216	-21.6924	0.521446	-21.7928	0.521357	-7.04354	0.195238	-21.6091		0.55933	-21.4243	0.918044	-5.34613	0.912943	-5.20921	0.922218	-5.10571		0.51178	-21.3367	0.713076	-7.12487	0.713162	-7.1937	0.713394	-7.37764
0.57023	-21.1261	0.724096	-2.98469	0.724089	-22.5116	0.218702	-21.8127		0.56929	-21.693	0.569102	-21.7928	0.568992	-7.08532	0.263015	-21.6106		0.61076	-21.4241	0.959022	-5.39451	0.956472	-5.36568	0.961109	-5.1363		0.55802	-21.3369	0.753358	-7.35105	0.753515	-7.45251	0.753849	-7.65331
0.62338	-21.1264	0.768944	-3.13837	0.791135	-22.5132	0.273378	-21.8135		0.62223	-21.6923	0.622	-21.7928	0.621866	-7.03942	0.330792	-21.6116		0.6622	-21.4233	1	-5.41222	1	-5.38033	1	-5.22271		0.60935	-21.3366	0.793641	-7.48932	0.793867	-7.60669	0.794304	-7.80572
0.67654	-21.1259	0.813793	-3.45508	0.85818	-22.5137	0.328053	-21.8138		0.67517	-21.6912	0.674899	-21.7932	0.674741	-7.13928	0.410782	-21.6105		0.71363	-21.4231	0	--	0	--	0	--		0.66068	-21.336	0.833923	-7.56154	0.83422	-7.69645	0.834759	-7.9019
0.72969	-21.1252	0.858641	-3.71714	0.92909	-22.5123	0.385369	-21.8135		0.72811	-21.6898	0.727797	-21.7919	0.727616	-7.01438	0.490773	-21.6104		0.75419	-21.4229	0	-5.41118	0	-5.26662	0	-5.19069		0.71201	-21.3366	0.875442	-7.33058	0.875665	-7.44165	0.87607	-7.63214
0.77667	-21.1256	0.905761	-3.33705	1	-22.5137	0.442684	-21.8126		0.77451	-21.6909	0.774081	-21.7924	0.773832	-7.16176	0.570763	-21.6121		0.79475	-21.423	0.040978	-4.9911	0.0435284	-5.2501	0.0388911	-5.13228		0.75185	-21.3366	0.916961	-7.4382	0.91711	-7.53155	0.91738	-7.75204
0.82366	-21.1259	0.95288	-3.00263	0	--	0.5	-21.8114		0.82091	-21.692	0.820365	-21.793	0.820048	-7.09743	0.650673	-21.6104		0.8353	-21.4235	0.081956	-4.98393	0.0870568	-5.10778	0.0777823	-5.10125		0.7917	-21.336	0.958481	-7.18974	0.958555	-7.27612	0.95869	-7.46073
0.87064	-21.126	1	-2.80264	0	-22.5117	0.554676	-21.8125		0.86731	-21.6927	0.86665	-21.7934	0.866263	-7.19125	0.730584	-21.6105		0.87648	-21.4237	0.122934	-5.27118	0.130585	-5.04333	0.116673	-5.07607		0.83155	-21.3365	1	-7.11495	1	-7.17634	1	-7.35745
0.91376	-21.1261	0	--	0.0709098	-22.5108	0.609351	-21.8133		0.91154	-21.6928	0.9111	-21.7932	0.910842	-7.22535	0.801561	-21.6095		0.91765	-21.424	0.163912	-5.36354	0.174114	-5.24168	0.155565	-5.4068		0.87366	-21.3365	0	--	0	--	0	--
0.95688	-21.1261	0	-2.76694	0.14182	-22.5071	0.664027	-21.8135		0.95577	-21.6929	0.95555	-21.793	0.955421	-7.13302	0.872539	-21.6104		0.95883	-21.4242	0.204886	-5.49242	0.211924	-5.12301	0.198981	-5.27106		0.91577	-21.3361	0	-7.01512	0	-7.05934	0	-7.19659
1	-21.1261	0.0471196	-2.74209	0.236109	-22.5081	0.718702	-21.8133		1	-21.693	1	-21.7928	1	-7.08532	0.936269	-21.6116		1	-21.4243	0.245861	-5.78426	0.249735	-5.51797	0.242397	-5.57782		0.95789	-21.3366	0.0415193	-7.18396	0.0414449	-7.27283	0.0413101	-7.45998
0	--	0.0942392	-3.32981	0.330399	-22.5104	0.773378	-21.8128		0	--	0	--	0	--	1	-21.6121		0	--	0.286835	-6.02987	0.287546	-5.85155	0.285813	-5.85138		1	-21.3369	0.0830387	-7.32205	0.0828899	-7.39437	0.0826203	-7.58923
0	-21.1243	0.141359	-3.31093	0.409169	-22.5107	0.828053	-21.8122		0	-21.6929	0	-21.7928	0	-6.81767	0	--		0	-21.424	0.32781	-6.16844	0.325357	-5.99526	0.329229	-5.97507		0	--	0.124558	-7.23972	0.124335	-7.31261	0.12393	-7.50671
0.04312	-21.125	0.188659	-3.28353	0.487938	-22.5122	0.885369	-21.8129		0.04423	-21.6928	0.0444501	-21.7929	0.0445789	-6.87157	0	-21.6108		0.04117	-21.424	0.366441	-5.97647	0.363794	-5.85601	0.368085	-5.8018		0	-21.3343	0.166077	-7.04285	0.16578	-7.10542	0.165241	-7.2909
0.08624	-21.1255	0.235958	-3.11123	0.566708	-22.5117	0.942684	-21.8133		0.08846	-21.6927	0.0889002	-21.7932	0.0891577	-7.01186	0.0637306	-21.6106		0.08235	-21.4238	0.405072	-5.56603	0.402231	-5.51856	0.406941	-5.49456		0.04211	-21.3349	0.20639	-7.02639	0.20619	-7.08786	0.205814	-7.27276
0.12936	-21.126	0.283258	-2.75566	0.645398	-22.5122	1	-21.8135		0.13269	-21.6927	0.13335	-21.7934	0.133737	-7.19112	0.127461	-21.6101		0.12352	-21.4235	0.443704	-5.25087	0.440668	-5.2178	0.445797	-5.21445		0.08423	-21.3359	0.246703	-6.98069	0.2466	-7.0388	0.246388	-7.22169
0.17972	-21.1257	0.330558	-2.89027	0.724089	-22.5107	0	--		0.18222	-21.6918	0.182718	-21.7927	0.183007	-7.00955	0.195238	-21.609		0.1647	-21.4235	0.482335	-5.03143	0.479105	-5.26498	0.484653	-5.04779		0.12634	-21.3353	0.287015	-6.91549	0.28701	-6.96817	0.286962	-7.14725
0.23009	-21.1253	0.389612	-2.778	0.791135	-22.5086	0	-21.8099		0.23176	-21.6905	0.232086	-21.7917	0.232277	-7.01755	0.263015	-21.6105		0.20544	-21.4229	0.520967	-5.12848	0.517542	-5.42385	0.523509	-5.17802		0.16845	-21.336	0.327328	-6.83791	0.32742	-6.88385	0.327536	-7.05928
0.28045	-21.1247	0.448667	-2.87115	0.85818	-22.5071	0.0546755	-21.8102		0.28129	-21.6891	0.281454	-21.7911	0.281547	-7.04461	0.330792	-21.6091		0.24617	-21.4226	0.559598	-5.41118	0.555979	-5.26662	0.562365	-5.19069		0.22124	-21.336	0.373636	-7.00329	0.373728	-7.06555	0.373857	-7.23604
0.33082	-21.1242	0.507721	-2.84079	0.92909	-22.5108	0.109351	-21.8108		0.33083	-21.6888	0.330822	-21.7911	0.330817	-7.06873	0.410782	-21.6102		0.28691	-21.4229	0.598191	-5.12878	0.594377	-5.42416	0.601182	-5.17824		0.27403	-21.336	0.419944	-7.17406	0.420035	-7.24415	0.420179	-7.43064
0.3787	-21.1244	0.566775	-2.76694	1	-22.5117	0.164027	-21.8117		0.37852	-21.6891	0.378478	-21.7914	0.378452	-7.00025	0.490773	-21.6092		0.32765	-21.4234	0.636783	-5.03097	0.632776	-5.26479	0.64	-5.04772		0.32682	-21.3359	0.466253	-7.25142	0.466343	-7.33193	0.4665	-7.5213
0.42658	-21.1246	0.619216	-2.76784	0	--	0.218702	-21.8119		0.42621	-21.6901	0.426134	-21.7922	0.426087	-6.95062	0.570763	-21.6108		0.37398	-21.4228	0.675376	-5.25277	0.671174	-5.21735	0.678817	-5.21376		0.37306	-21.3353	0.512561	-7.08314	0.51265	-7.14525	0.512822	-7.30501
0.47447	-21.1246	0.671656	-2.90683	0	-22.5035	0.273378	-21.8122		0.47391	-21.6913	0.47379	-21.7929	0.473722	-7.01404	0.650673	-21.6092		0.42032	-21.4227	0.713969	-5.56423	0.709573	-5.51724	0.717634	-5.49333		0.4193	-21.3356	0.55887	-7.01512	0.558958	-7.05934	0.559143	-7.19659
0.52235	-21.1246	0.724096	-2.80315	0.0709098	-22.5045	0.328053	-21.8123		0.5216	-21.6923	0.521446	-21.7926	0.521357	-6.9602	0.730584	-21.6102		0.46666	-21.4233	0.754675	-5.51703	0.748344	-5.3657	0.759901	-5.36475		0.46554	-21.3356	0.597421	-7.0658	0.597509	-7.12587	0.597706	-7.28246
0.57023	-21.1243	0.768944	-3.06721	0.14182	-22.5071	0.385369	-21.8122		0.56929	-21.6929	0.569102	-21.7928	0.568992	-6.81767	0.801561	-21.6089		0.51299	-21.4236	0.795382	-5.39527	0.787115	-5.04587	0.802168	-5.19184		0.51178	-21.3347	0.635973	-7.17025	0.63606	-7.27067	0.636269	-7.44717
0.62338	-21.1246	0.813793	-3.32628	0.236109	-22.508	0.442684	-21.8118		0.62223	-21.6922	0.622	-21.7926	0.621866	-6.97625	0.872539	-21.6101		0.55933	-21.424	0.836088	-5.36354	0.825886	-5.24168	0.844435	-5.4068		0.55802	-21.3343	0.674525	-7.23127	0.674611	-7.30198	0.674831	-7.49059
0.67654	-21.1246	0.858641	-3.31093	0.330399	-22.5104	0.5	-21.8113		0.67517	-21.6911	0.674899	-21.793	0.674741	-7.01051	0.936269	-21.6106		0.61076	-21.4236	0.877066	-5.27118	0.869415	-5.04333	0.883327	-5.07607		0.60935	-21.3347	0.713076	-7.11234	0.713162	-7.17608	0.713394	-7.34004
0.72969	-21.1245	0.905761	-3.32981	0.409169	-22.5071	0.554676	-21.8113		0.72811	-21.6897	0.727797	-21.7919	0.727616	-6.94789	1	-21.6108		0.6622	-21.4233	0.918044	-4.98393	0.912943	-5.10778	0.922218	-5.10125		0.66068	-21.3358	0.753358	-7.1545	0.753515	-7.2251	0.753849	-7.41502
0.77667	-21.1251	0.95288	-2.74209	0.487938	-22.5045	0.609351	-21.8114		0.77451	-21.6909	0.774081	-21.7923	0.773832	-6.97949	0	--		0.71363	-21.4226	0.959022	-4.9911	0.956472	-5.2501	0.961109	-5.13228		0.71201	-21.3353	0.793641	-7.12478	0.793867	-7.195	0.794304	-7.38474
0.82366	-21.1256	1	-2.76694	0.566708	-22.5035	0.664027	-21.8114		0.82091	-21.692	0.820365	-21.7929	0.820048	-7.08072	0	-21.6089		0.75419	-21.4226	1	-5.41118	1	-5.26662	1	-5.19069		0.75185	-21.3353	0.833923	-7.04285	0.83422	-7.10542	0.834759	-7.2909
0.87064	-21.126	0	--	0.645398	-22.5045	0.718702	-21.8114		0.86731	-21.6927	0.86665	-21.7934	0.866263	-7.19112	0.0637306	-21.6096		0.79475	-21.423	0	--	0	--	0	--		0.7917	-21.336	0.875442	-7.23972	0.875665	-7.31261	0.87607	-7.50671
0.91376	-21.1255	0	-2.70789	0.724089	-22.5071	0.773378	-21.8117		0.91154	-21.6927	0.9111	-21.7932	0.910842	-7.01186	0.127461	-21.61		0.8353	-21.4235	0	-4.88904	0	-5.19496	0	-5.17737		0.83155	-21.336	0.916961	-7.32205	0.91711	-7.39437	0.91738	-7.58923
0.95688	-21.125	0.0471196	-2.73463	0.791135	-22.5065	0.828053	-21.8121		0.95577	-21.6928	0.95555	-21.7929	0.955421	-6.87157	0.195238	-21.6089		0.87648	-21.4235	0.040978	-4.91601	0.0435284	-5.1684	0.0388911	-5.11567		0.87366	-21.3353	0.958481	-7.18396	0.958555	-7.27283	0.95869	-7.45998
1	-21.1243	0.0942392	-3.17313	0.85818	-22.5071	0.885369	-21.8114		1	-21.6929	1	-21.7928	1	-6.81767	0.263015	-21.6104		0.91765	-21.4238	0.081956	-4.98165	0.0870568	-5.04818	0.0777823	-5.02983		0.91577	-21.3359	1	-7.01512	1	-7.05934	1	-7.19659
0	--	0.141359	-3.31088	0.92909	-22.5045	0.942684	-21.8106		0	--	0	--	0	--	0.330792	-21.609		0.95883	-21.424	0.122934	-5.07645	0.130585	-4.82231	0.116673	-4.97114		0.95789	-21.3349	0	--	0	--	0	--
0	-21.1243	0.188659	-3.28347	1	-22.5035	1	-21.8099		0	-21.6911	0	-21.7925	0	-6.81671	0.410782	-21.6099		1	-21.424	0.163912	-5.17595	0.174114	-4.76033	0.155565	-4.979		1	-21.3343	0	-7.0119	0	-7.05889	0	-7.19568
0.04312	-21.1235	0.235958	-3.10811	0	--	0	--		0.04423	-21.6918	0.0444501	-21.7929	0.0445789	-6.87067	0.490773	-21.6083		0	--	0.204886	-4.85514	0.211924	-5.03991	0.198981	-4.91051		0	--	0.0415193	-6.97188	0.0414449	-7.07371	0.0413101	-7.24093
0.08624	-21.1227	0.283258	-2.75171	0	-14.4799	0	-21.8099		0.08846	-21.6925	0.0889002	-21.7931	0.0891577	-7.01108	0.570763	-21.6089		0	-21.4219	0.245861	-5.33205	0.249735	-5.4111	0.242397	-4.81379		0	-21.3341	0.0830387	-7.11576	0.0828899	-7.22162	0.0826203	-7.39854
0.12936	-21.1223	0.330558	-2.89021	0.0709098	-14.4275	0.0546755	-21.8099		0.13269	-21.6927	0.13335	-21.7934	0.133737	-7.00309	0.650673	-21.6083		0.04117	-21.4223	0.286835	-5.86093	0.287546	-5.76769	0.285813	-5.50618		0.04211	-21.3344	0.124558	-7.01112	0.124335	-7.08468	0.12393	-7.28947
0.17972	-21.1227	0.389612	-2.72883	0.14182	-14.2721	0.109351	-21.8106		0.18222	-21.6918	0.182718	-21.7926	0.183007	-7.00605	0.730584	-21.6099		0.08235	-21.4225	0.32781	-6.1673	0.325357	-5.98757	0.329229	-5.96782		0.08423	-21.3353	0.166077	-7.03496	0.16578	-7.10477	0.165241	-7.29043
0.23009	-21.1231	0.448667	-2.55671	0.236109	-14.1833	0.164027	-21.8113		0.23176	-21.6905	0.232086	-21.7915	0.232277	-6.88829	0.801561	-21.6088		0.12352	-21.4224	0.366441	-5.97233	0.363794	-5.70266	0.368085	-5.70229		0.12634	-21.3352	0.20639	-7.01803	0.20619	-7.0872	0.205814	-7.27224
0.28045	-21.1236	0.507721	-2.6241	0.330399	-13.9227	0.218702	-21.8109		0.28129	-21.6891	0.281454	-21.7911	0.281547	-6.96211	0.872539	-21.61		0.1647	-21.422	0.405072	-5.4861	0.402231	-5.36509	0.406941	-5.38354		0.16845	-21.3359	0.246703	-6.97141	0.2466	-7.0381	0.246388	-7.22101
0.33082	-21.1241	0.566775	-2.70789	0.409169	-14.2221	0.273378	-21.81		0.33083	-21.6888	0.330822	-21.791	0.330817	-7.0687	0.936269	-21.6096		0.20544	-21.4222	0.443704	-5.07946	0.440668	-5.20447	0.445797	-5.09187		0.22124	-21.3359	0.287015	-6.90563	0.28701	-6.96738	0.286962	-7.14635
0.3787	-21.1238	0.619216	-2.64725	0.487938	-14.4145	0.328053	-21.8093		0.37852	-21.689	0.378478	-21.7914	0.378452	-6.94179	1	-21.6089		0.24617	-21.4224	0.482335	-4.83164	0.479105	-4.98791	0.484653	-4.97921		0.27403	-21.3359	0.327328	-6.83069	0.32742	-6.8832	0.327536	-7.05852
0.42658	-21.1233	0.671656	-2.5361	0.566708	-14.4799	0.385369	-21.8097		0.42621	-21.6899	0.426134	-21.7917	0.426087	-6.92059	0	--		0.28691	-21.4225	0.520967	-4.95451	0.517542	-5.14103	0.523509	-5.04357		0.32682	-21.3359	0.373636	-6.85016	0.373728	-6.8872	0.373857	-7.04739
0.47447	-21.1231	0.724096	-2.66489	0.645398	-14.4147	0.442684	-21.8104		0.47391	-21.6913	0.47379	-21.792	0.473722	-6.83285	0	-21.6088		0.32765	-21.4224	0.559598	-4.88904	0.555979	-5.19496	0.562365	-5.17737		0.37306	-21.3352	0.419944	-7.14055	0.420035	-7.20612	0.420179	-7.37274
0.52235	-21.1237	0.768944	-2.9764	0.724089	-14.2226	0.5	-21.8112		0.5216	-21.6916	0.521446	-21.7922	0.521357	-6.73909	0.0637306	-21.6083		0.37398	-21.4226	0.598191	-4.95438	0.594377	-5.14129	0.601182	-5.04371		0.4193	-21.3354	0.466253	-7.15404	0.466343	-7.22624	0.4665	-7.39409
0.57023	-21.1243	0.813793	-3.24758	0.791135	-14.2937	0.554676	-21.8108		0.56929	-21.6911	0.569102	-21.7925	0.568992	-6.81671	0.127461	-21.6098		0.42032	-21.4225	0.636783	-4.83223	0.632776	-4.98798	0.64	-4.97922		0.46554	-21.335	0.512561	-7.0166	0.51265	-7.12072	0.512822	-7.28947
0.62338	-21.1237	0.858641	-3.31088	0.85818	-14.2721	0.609351	-21.8103		0.62223	-21.6916	0.622	-21.7922	0.621866	-6.74963	0.195238	-21.6087		0.46666	-21.4224	0.675376	-5.07791	0.671174	-5.20236	0.678817	-5.09107		0.51178	-21.3343	0.55887	-7.0119	0.558958	-7.05889	0.559143	-7.19568
0.67654	-21.123	0.905761	-3.17313	0.92909	-14.4275	0.664027	-21.8098		0.67517	-21.691	0.674899	-21.7919	0.674741	-6.85274	0.263015	-21.6102		0.51299	-21.4222	0.713969	-5.48366	0.709573	-5.36377	0.717634	-5.38229		0.55802	-21.3341	0.597421	-6.98924	0.597509	-7.09161	0.597706	-7.25887
0.72969	-21.1234	0.95288	-2.73463	1	-14.4799	0.718702	-21.8092		0.72811	-21.6895	0.727797	-21.7916	0.727616	-6.86264	0.330792	-21.609		0.55933	-21.4219	0.754675	-5.29599	0.748344	-5.18915	0.759901	-4.86146		0.60935	-21.3344	0.635973	-7.13246	0.63606	-7.20849	0.636269	-7.37517
0.77667	-21.123	1	-2.70789	0	--	0.773378	-21.8086		0.77451	-21.6908	0.774081	-21.7915	0.773832	-6.8899	0.410782	-21.6099		0.61076	-21.4222	0.795382	-5.15828	0.787115	-4.95467	0.802168	-5.13137		0.66068	-21.3352	0.674525	-7.16117	0.674611	-7.2306	0.674831	-7.39831
0.82366	-21.1227	0	--	0	-13.7174	0.828053	-21.8081		0.82091	-21.6919	0.820365	-21.7926	0.820048	-6.96689	0.490773	-21.6082		0.6622	-21.4224	0.836088	-5.17595	0.825886	-4.76033	0.844435	-4.979		0.71201	-21.3351	0.713076	-7.06214	0.713162	-7.12472	0.713394	-7.31616
0.87064	-21.1223	0	-2.62588	0.0709098	-14.0198	0.885369	-21.8086		0.86731	-21.6927	0.86665	-21.7934	0.866263	-7.00309	0.570763	-21.6088		0.71363	-21.4226	0.877066	-5.07645	0.869415	-4.82231	0.883327	-4.97114		0.75185	-21.3352	0.753358	-6.9237	0.753515	-6.98613	0.753849	-7.17956
0.91376	-21.1227	0.0471196	-2.59597	0.14182	-14.2721	0.942684	-21.8092		0.91154	-21.6925	0.9111	-21.7931	0.910842	-7.01108	0.650673	-21.6082		0.75419	-21.4225	0.918044	-4.98165	0.912943	-5.04818	0.922218	-5.02983		0.7917	-21.3359	0.793641	-6.9113	0.793867	-6.97045	0.794304	-7.14924
0.95688	-21.1235	0.0942392	-2.38359	0.236109	-14.1802	1	-21.8099		0.95577	-21.6918	0.95555	-21.7929	0.955421	-6.87067	0.730584	-21.6099		0.79475	-21.4223	0.959022	-4.91601	0.956472	-5.1684	0.961109	-5.11567		0.83155	-21.3359	0.833923	-7.03496	0.83422	-7.10477	0.834759	-7.29043
1	-21.1243	0.141359	-2.18655	0.330399	-13.9227	0	--		1	-21.6911	1	-21.7925	1	-6.81671	0.801561	-21.6084		0.8353	-21.422	1	-4.88904	1	-5.19496	1	-5.17737		0.87366	-21.3352	0.875442	-7.01112	0.875665	-7.08468	0.87607	-7.28947
0	--	0.188659	-2.16372	0.409169	-13.9627	0	-21.8073		0	--	0	--	0	--	0.872539	-21.6098		0.87648	-21.4224	0	--	0	--	0	--		0.91577	-21.3353	0.916961	-7.11576	0.91711	-7.22162	0.91738	-7.39854
0	-21.1228	0.235958	-2.39871	0.487938	-13.8811	0.0546755	-21.8074		0	-21.6911	0	-21.7925	0	-6.64243	0.936269	-21.6083		0.91765	-21.4225	0	-4.88771	0	-5.19295	0	-5.14961		0.95789	-21.3344	0.958481	-6.97188	0.958555	-7.07371	0.95869	-7.24093
0.04312	-21.1227	0.283258	-2.64979	0.566708	-13.7174	0.109351	-21.8075		0.04423	-21.6917	0.0444501	-21.7927	0.0445789	-6.77389	1	-21.6088		0.95883	-21.4223	0.040978	-4.9144	0.0435284	-5.03949	0.0388911	-5.01237		1	-21.3341	1	-7.0119	1	-7.05889	1	-7.19568
0.08624	-21.1226	0.330558	-2.70266	0.645398	-13.8809	0.164027	-21.8078		0.08846	-21.6924	0.0889002	-21.7931	0.0891577	-6.83926	0	--		1	-21.4219	0.081956	-4.69891	0.0870568	-4.76022	0.0777823	-5.0197		0	--	0	--	0	--	0	--
0.12936	-21.1223	0.389612	-2.66533	0.724089	-13.9627	0.218702	-21.8082		0.13269	-21.6927	0.13335	-21.7934	0.133737	-7.00306	0	-21.6082		0	--	0.122934	-5.07342	0.130585	-4.6918	0.116673	-4.96747		0	-21.3337	0	-6.92308	0	-7.02175	0	-7.18532
0.17972	-21.1227	0.448667	-2.51753	0.791135	-14.1597	0.273378	-21.8087		0.18222	-21.6918	0.182718	-21.7926	0.183007	-7.00602	0.0637306	-21.6081		0	-21.4217	0.163912	-5.17537	0.174114	-4.76009	0.155565	-4.96735		0.04211	-21.3337	0.0415193	-6.86608	0.0414449	-6.91951	0.0413101	-7.09291
0.23009	-21.1231	0.507721	-2.55829	0.85818	-14.2721	0.328053	-21.8093		0.23176	-21.6905	0.232086	-21.7915	0.232277	-6.88825	0.127461	-21.6097		0.04117	-21.4212	0.204886	-4.85405	0.211924	-5.03584	0.198981	-4.89705		0.08423	-21.3343	0.0830387	-6.72762	0.0828899	-6.77151	0.0826203	-6.96801
0.28045	-21.1236	0.566775	-2.62588	0.92909	-14.0198	0.385369	-21.8093		0.28129	-21.6891	0.281454	-21.7911	0.281547	-6.96207	0.195238	-21.6086		0.08235	-21.4208	0.245861	-5.33152	0.249735	-5.40454	0.242397	-4.80796		0.12634	-21.3352	0.124558	-6.75681	0.124335	-6.80855	0.12393	-6.97671
0.33082	-21.1241	0.619216	-2.57487	1	-13.7174	0.442684	-21.8101		0.33083	-21.6888	0.330822	-21.791	0.330817	-7.06869	0.263015	-21.6102		0.12352	-21.4215	0.286835	-5.86057	0.287546	-5.76047	0.285813	-5.50069		0.16845	-21.3355	0.166077	-6.57859	0.16578	-6.60685	0.165241	-6.78053
0.3787	-21.1236	0.671656	-2.46246	0	--	0.5	-21.8111		0.37852	-21.689	0.378478	-21.7913	0.378452	-6.92516	0.330792	-21.609		0.1647	-21.422	0.32781	-6.16726	0.325357	-5.98745	0.329229	-5.96776		0.22124	-21.3356	0.20639	-6.64967	0.20619	-6.68633	0.205814	-6.86024
0.42658	-21.1232	0.724096	-2.62408	0	-13.6431	0.554676	-21.8101		0.42621	-21.6898	0.426134	-21.7915	0.426087	-6.82611	0.410782	-21.6098		0.20544	-21.4221	0.366441	-5.89919	0.363794	-5.59817	0.368085	-5.60999		0.27403	-21.3357	0.246703	-6.71503	0.2466	-6.75264	0.246388	-6.92497
0.47447	-21.123	0.768944	-2.39878	0.0709098	-13.2834	0.609351	-21.8089		0.47391	-21.6912	0.47379	-21.7917	0.473722	-6.72879	0.490773	-21.6081		0.24617	-21.4224	0.405072	-5.48533	0.402231	-5.00763	0.406941	-4.97487		0.32682	-21.3358	0.287015	-6.77647	0.28701	-6.81655	0.286962	-6.98849
0.52235	-21.1228	0.813793	-2.23103	0.14182	-13.0966	0.664027	-21.808		0.5216	-21.6914	0.521446	-21.7922	0.521357	-6.68242	0.570763	-21.6082		0.28691	-21.4225	0.443704	-4.80896	0.440668	-5.07279	0.445797	-5.04447		0.37306	-21.3348	0.327328	-6.81001	0.32742	-6.85808	0.327536	-7.00182
0.57023	-21.1228	0.858641	-2.18655	0.236109	-13.5257	0.718702	-21.8077		0.56929	-21.6911	0.569102	-21.7925	0.568992	-6.64243	0.650673	-21.6081		0.32765	-21.4224	0.482335	-4.83133	0.479105	-4.88044	0.484653	-4.76608		0.4193	-21.3344	0.373636	-6.80941	0.373728	-6.85149	0.373857	-7.01714
0.62338	-21.1229	0.905761	-2.38359	0.330399	-13.9163	0.773378	-21.8077		0.62223	-21.6915	0.622	-21.7921	0.621866	-6.6683	0.730584	-21.6098		0.37398	-21.4222	0.520967	-4.86822	0.517542	-4.88423	0.523509	-4.94649		0.46554	-21.3339	0.419944	-6.83136	0.420035	-6.88468	0.420179	-7.0787
0.67654	-21.1229	0.95288	-2.59597	0.409169	-13.7624	0.828053	-21.808		0.67517	-21.6909	0.674899	-21.7917	0.674741	-6.74816	0.801561	-21.6082		0.42032	-21.4216	0.559598	-4.88771	0.555979	-5.19295	0.562365	-5.14961		0.51178	-21.3337	0.466253	-6.89153	0.466343	-6.94793	0.4665	-7.15224
0.72969	-21.1234	1	-2.62588	0.487938	-13.4958	0.885369	-21.8077		0.72811	-21.6894	0.727797	-21.7914	0.727616	-6.85325	0.872539	-21.6097		0.46666	-21.4208	0.598191	-4.86826	0.594377	-4.88453	0.601182	-4.94681		0.55802	-21.3337	0.512561	-6.91564	0.51265	-6.97048	0.512822	-7.14832
0.77667	-21.1229	0	--	0.566708	-13.6431	0.942684	-21.8074		0.77451	-21.6907	0.774081	-21.7914	0.773832	-6.86739	0.936269	-21.6081		0.51299	-21.4212	0.636783	-4.83193	0.632776	-4.88	0.64	-4.76522		0.60935	-21.3337	0.55887	-6.92308	0.558958	-7.02175	0.559143	-7.18532
0.82366	-21.1226	0	-2.44347	0.645398	-13.4954	1	-21.8073		0.82091	-21.6919	0.820365	-21.7925	0.820048	-6.93036	1	-21.6082		0.55933	-21.4217	0.675376	-4.8068	0.671174	-5.07207	0.678817	-5.04235		0.66068	-21.334	0.597421	-6.9517	0.597509	-7.00839	0.597706	-7.18455
0.87064	-21.1223	0.0471196	-2.42955	0.724089	-13.762	0	--		0.86731	-21.6927	0.86665	-21.7934	0.866263	-7.00306	0	--		0.61076	-21.4211	0.713969	-5.48289	0.709573	-5.0091	0.717634	-4.97201		0.71201	-21.3347	0.635973	-6.89934	0.63606	-6.95566	0.636269	-7.16158
0.91376	-21.1226	0.0942392	-2.02627	0.791135	-13.4164	0	-21.8054		0.91154	-21.6924	0.9111	-21.7931	0.910842	-6.83926	0	-21.6076		0.6622	-21.421	0.754675	-4.9933	0.748344	-5.0849	0.759901	-4.84437		0.75185	-21.335	0.674525	-6.86644	0.674611	-6.92182	0.674831	-7.12196
0.95688	-21.1227	0.141359	-2.1865	0.85818	-13.0966	0.0546755	-21.8053		0.95577	-21.6917	0.95555	-21.7927	0.955421	-6.77389	0.0637306	-21.608		0.71363	-21.4219	0.795382	-4.91212	0.787115	-4.93381	0.802168	-4.8329		0.7917	-21.3353	0.713076	-6.80826	0.713162	-6.85993	0.713394	-7.04922
1	-21.1228	0.188659	-2.16359	0.92909	-13.2834	0.109351	-21.805		1	-21.6911	1	-21.7925	1	-6.64243	0.127461	-21.6075		0.75419	-21.4219	0.836088	-5.17537	0.825886	-4.76009	0.844435	-4.96735		0.83155	-21.3355	0.753358	-6.77599	0.753515	-6.82704	0.753849	-7.01317
0	--	0.235958	-2.39817	1	-13.6431	0.164027	-21.8043		0	--	0	--	0	--	0.195238	-21.6081		0.79475	-21.4219	0.877066	-5.07342	0.869415	-4.6918	0.883327	-4.96747		0.87366	-21.3352	0.793641	-6.73978	0.793867	-6.7975	0.794304	-6.98943
0	-21.1228	0.283258	-2.64949	0	--	0.218702	-21.8032		0	-21.6909	0	-21.7922	0	-6.64201	0.263015	-21.6097		0.8353	-21.422	0.918044	-4.69891	0.912943	-4.76022	0.922218	-5.0197		0.91577	-21.3343	0.833923	-6.57859	0.83422	-6.60685	0.834759	-6.78053
0.04312	-21.1227	0.330558	-2.7018	0	-13.1746	0.273378	-21.8023		0.04423	-21.6901	0.0444501	-21.792	0.0445789	-6.68055	0.330792	-21.6085		0.87648	-21.4215	0.959022	-4.9144	0.956472	-5.03949	0.961109	-5.01237		0.95789	-21.3337	0.875442	-6.75681	0.875665	-6.80855	0.87607	-6.97671
0.08624	-21.1225	0.389612	-2.53994	0.0709098	-13.1527	0.328053	-21.8023		0.08846	-21.6892	0.0889002	-21.7914	0.0891577	-6.78524	0.410782	-21.6097		0.91765	-21.4208	1	-4.88771	1	-5.19295	1	-5.14961		1	-21.3337	0.916961	-6.72762	0.91711	-6.77151	0.91738	-6.96801
0.12936	-21.1223	0.448667	-2.39194	0.14182	-13.0966	0.385369	-21.8024		0.13269	-21.6886	0.13335	-21.7908	0.133737	-6.83479	0.490773	-21.6081		0.95883	-21.4212	0	--	0	--	0	--		0	--	0.958481	-6.86608	0.958555	-6.91951	0.95869	-7.09291
0.17972	-21.122	0.507721	-2.47593	0.236109	-13.5154	0.442684	-21.8025		0.18222	-21.6888	0.182718	-21.7909	0.183007	-6.84752	0.570763	-21.6076		1	-21.4217	0	-4.78141	0	-5.19074	0	-5.14323		0	-21.3335	1	-6.92308	1	-7.02175	1	-7.18532
0.23009	-21.1218	0.566775	-2.44347	0.330399	-13.9163	0.5	-21.8026		0.23176	-21.689	0.232086	-21.791	0.232277	-6.79124	0.650673	-21.6081		0	--	0.040978	-4.74488	0.0435284	-4.73358	0.0388911	-4.79784		0.04211	-21.3337	0	--	0	--	0	--
0.28045	-21.1217	0.619216	-2.46922	0.409169	-13.5316	0.554676	-21.8031		0.28129	-21.6888	0.281454	-21.791	0.281547	-6.56213	0.730584	-21.6097		0	-21.4196	0.081956	-4.63862	0.0870568	-4.32564	0.0777823	-4.36282		0.08423	-21.3342	0	-6.79575	0	-6.86972	0	-7.06614
0.33082	-21.1216	0.671656	-2.44749	0.487938	-13.3849	0.609351	-21.8036		0.33083	-21.6887	0.330822	-21.791	0.330817	-6.35171	0.801561	-21.6081		0.04117	-21.42	0.122934	-4.69264	0.130585	-4.58327	0.116673	-4.74781		0.12634	-21.3349	0.0415193	-6.77825	0.0414449	-6.8247	0.0413101	-7.0262
0.3787	-21.122	0.724096	-2.43758	0.566708	-13.1746	0.664027	-21.804		0.37852	-21.689	0.378478	-21.7908	0.378452	-6.65089	0.872539	-21.6075		0.08235	-21.4203	0.163912	-5.17076	0.174114	-4.67204	0.155565	-4.96546		0.16845	-21.3354	0.0830387	-6.72536	0.0828899	-6.77128	0.0826203	-6.96534
0.42658	-21.1225	0.768944	-2.26671	0.645398	-13.3853	0.718702	-21.8043		0.42621	-21.6896	0.426134	-21.7906	0.426087	-6.77548	0.936269	-21.608		0.12352	-21.4203	0.204886	-4.83242	0.211924	-4.91642	0.198981	-4.64367		0.22124	-21.3355	0.124558	-6.6524	0.124335	-6.69258	0.12393	-6.87989
0.47447	-21.1227	0.813793	-2.1276	0.724089	-13.5307	0.773378	-21.8044		0.47391	-21.69	0.47379	-21.7913	0.473722	-6.65734	1	-21.6076		0.1647	-21.4203	0.245861	-4.54555	0.249735	-4.60165	0.242397	-4.68593		0.27403	-21.3356	0.166077	-6.57102	0.16578	-6.60584	0.165241	-6.77941
0.52235	-21.1227	0.858641	-2.1865	0.791135	-13.3174	0.828053	-21.8041		0.5216	-21.6905	0.521446	-21.792	0.521357	-6.66057	0	--		0.20544	-21.4208	0.286835	-4.27165	0.287546	-4.36837	0.285813	-4.53271		0.32682	-21.3358	0.20639	-6.64725	0.20619	-6.68548	0.205814	-6.8587
0.57023	-21.1228	0.905761	-2.02627	0.85818	-13.0966	0.885369	-21.8049		0.56929	-21.6909	0.569102	-21.7922	0.568992	-6.64201	0	-21.6076		0.24617	-21.4214	0.32781	-4.0486	0.325357	-4.24939	0.329229	-4.24468		0.37306	-21.3347	0.246703	-6.70967	0.2466	-6.7517	0.246388	-6.92352
0.62338	-21.1227	0.95288	-2.42955	0.92909	-13.1527	0.942684	-21.8053		0.62223	-21.6905	0.622	-21.7919	0.621866	-6.66622	0.0637306	-21.6074		0.28691	-21.422	0.366441	-4.2929	0.363794	-4.63625	0.368085	-4.54956		0.4193	-21.3344	0.287015	-6.76792	0.28701	-6.81562	0.286962	-6.98721
0.67654	-21.1229	1	-2.44347	1	-13.1746	1	-21.8054		0.67517	-21.6899	0.674899	-21.7911	0.674741	-6.68009	0.127461	-21.6074		0.32765	-21.4224	0.405072	-4.5061	0.402231	-4.89195	0.406941	-4.84562		0.46554	-21.3339	0.327328	-6.80088	0.32742	-6.85683	0.327536	-6.99923
0.72969	-21.1223	0	--	0	--	0	--		0.72811	-21.6894	0.727797	-21.7907	0.727616	-6.82192	0.195238	-21.6081		0.37398	-21.4221	0.443704	-4.80816	0.440668	-4.83091	0.445797	-4.81249		0.51178	-21.3336	0.373636	-6.77934	0.373728	-6.83129	0.373857	-7.01054
0.77667	-21.1222	0	-2.43886	0	-13.1389	0	-21.7995		0.77451	-21.6892	0.774081	-21.7913	0.773832	-6.83635	0.263015	-21.6097		0.42032	-21.4212	0.482335	-4.79688	0.479105	-4.63217	0.484653	-4.62911		0.55802	-21.3335	0.419944	-6.71422	0.420035	-6.75114	0.420179	-6.92479
0.82366	-21.1221	0.0471196	-1.96706	0.0709098	-13.1172	0.0546755	-21.801		0.82091	-21.6889	0.820365	-21.791	0.820048	-6.85417	0.330792	-21.6085		0.46666	-21.4203	0.520967	-4.84793	0.517542	-4.87883	0.523509	-4.85432		0.60935	-21.3336	0.466253	-6.69414	0.466343	-6.7798	0.4665	-6.97441
0.87064	-21.1223	0.0942392	-1.95835	0.14182	-13.0617	0.109351	-21.802		0.86731	-21.6886	0.86665	-21.7908	0.866263	-6.83479	0.410782	-21.6091		0.51299	-21.4199	0.559598	-4.78141	0.555979	-5.19074	0.562365	-5.14323		0.66068	-21.3339	0.512561	-6.88509	0.51265	-6.9418	0.512822	-7.14525
0.91376	-21.1225	0.141359	-1.89139	0.236109	-12.8438	0.164027	-21.8024		0.91154	-21.6892	0.9111	-21.7914	0.910842	-6.78524	0.490773	-21.6077		0.55933	-21.4196	0.598191	-4.84779	0.594377	-4.87918	0.601182	-4.85461		0.71201	-21.3346	0.55887	-6.79575	0.558958	-6.86972	0.559143	-7.06614
0.95688	-21.1227	0.188659	-2.1313	0.330399	-12.7619	0.218702	-21.8024		0.95577	-21.6901	0.95555	-21.792	0.955421	-6.68055	0.570763	-21.6076		0.61076	-21.42	0.636783	-4.79708	0.632776	-4.63241	0.64	-4.62974		0.75185	-21.3347	0.597421	-6.87677	0.597509	-6.93179	0.597706	-7.13783
1	-21.1228	0.235958	-2.09702	0.409169	-13.0447	0.273378	-21.8017		1	-21.6909	1	-21.7922	1	-6.64201	0.650673	-21.6077		0.6622	-21.4205	0.675376	-4.80601	0.671174	-4.83228	0.678817	-4.81357		0.7917	-21.335	0.635973	-6.75906	0.63606	-6.8145	0.636269	-6.98607
0	--	0.283258	-2.29122	0.487938	-13.1568	0.328053	-21.7998		0	--	0	--	0	--	0.730584	-21.6091		0.71363	-21.4215	0.713969	-4.5071	0.709573	-4.8888	0.717634	-4.84686		0.83155	-21.3354	0.674525	-6.67163	0.674611	-6.75642	0.674831	-6.95787
0	-21.1218	0.330558	-2.69823	0.566708	-13.1389	0.385369	-21.8014		0	-21.6909	0	-21.7922	0	-6.6354	0.801561	-21.608		0.75419	-21.4211	0.754675	-4.84834	0.748344	-4.95278	0.759901	-4.67466		0.87366	-21.3349	0.713076	-6.74867	0.713162	-6.78726	0.713394	-6.9425
0.04312	-21.1219	0.389612	-2.40353	0.645398	-13.1565	0.442684	-21.8023		0.04423	-21.69	0.0444501	-21.7917	0.0445789	-6.61846	0.872539	-21.6074		0.79475	-21.4207	0.795382	-4.86658	0.787115	-4.89973	0.802168	-4.79032		0.91577	-21.3342	0.753358	-6.77412	0.753515	-6.8218	0.753849	-6.99525
0.08624	-21.1221	0.448667	-2.24	0.724089	-13.0454	0.5	-21.8025		0.08846	-21.689	0.0889002	-21.7912	0.0891577	-6.77	0.936269	-21.6074		0.8353	-21.4203	0.836088	-5.17076	0.825886	-4.67204	0.844435	-4.96546		0.95789	-21.3337	0.793641	-6.68444	0.793867	-6.72658	0.794304	-6.90848
0.12936	-21.1223	0.507721	-2.25577	0.791135	-12.988	0.554676	-21.8018		0.13269	-21.6886	0.13335	-21.7908	0.133737	-6.83475	1	-21.6076		0.87648	-21.4203	0.877066	-4.69264	0.869415	-4.58327	0.883327	-4.74781		1	-21.3335	0.833923	-6.57102	0.83422	-6.60584	0.834759	-6.77941
0.17972	-21.122	0.566775	-2.43886	0.85818	-13.0617	0.609351	-21.8007		0.18222	-21.6888	0.182718	-21.7909	0.183007	-6.84748	0	--		0.91765	-21.4203	0.918044	-4.63862	0.912943	-4.32564	0.922218	-4.36282		0	--	0.875442	-6.6524	0.875665	-6.69258	0.87607	-6.87989
0.23009	-21.1218	0.619216	-2.2245	0.92909	-13.1172	0.664027	-21.7997		0.23176	-21.689	0.232086	-21.791	0.232277	-6.79118	0	-21.6075		0.95883	-21.42	0.959022	-4.74488	0.956472	-4.73358	0.961109	-4.79784		0	-21.3321	0.916961	-6.72536	0.91711	-6.77128	0.91738	-6.96534
0.28045	-21.1216	0.671656	-2.33657	1	-13.1389	0.718702	-21.8017		0.28129	-21.6888	0.281454	-21.791	0.281547	-6.56208	0.0637306	-21.6073		1	-21.4196	1	-4.78141	1	-5.19074	1	-5.14323		0.04211	-21.3323	0.958481	-6.77825	0.958555	-6.8247	0.95869	-7.0262
0.33082	-21.1216	0.724096	-2.22869	0	--	0.773378	-21.8032		0.33083	-21.6887	0.330822	-21.791	0.330817	-6.35168	0.127461	-21.6074		0	--	0	--	0	--	0	--		0.08423	-21.3332	1	-6.79575	1	-6.86972	1	-7.06614
0.3787	-21.1219	0.768944	-2.24167	0	-13.0079	0.828053	-21.804		0.37852	-21.6889	0.378478	-21.7908	0.378452	-6.38797	0.195238	-21.6075		0	-21.4193	0	-4.77913	0	-4.22376	0	-3.85345		0.12634	-21.3344	0	--	0	--	0	--
0.42658	-21.1222	0.813793	-2.10981	0.0709098	-13.0352	0.885369	-21.8029		0.42621	-21.6894	0.426134	-21.7906	0.426087	-6.46014	0.263015	-21.6075		0.04117	-21.4197	0.040978	-4.61828	0.0435284	-4.20081	0.0388911	-4.50517		0.16845	-21.3343	0	-6.79214	0	-6.86885	0	-7.06444
0.47447	-21.1225	0.858641	-1.89139	0.14182	-13.0617	0.942684	-21.8013		0.47391	-21.6899	0.47379	-21.7912	0.473722	-6.56107	0.330792	-21.6084		0.08235	-21.42	0.081956	-4.55229	0.0870568	-4.17736	0.0777823	-4.3203		0.22124	-21.3342	0.0415193	-6.77304	0.0414449	-6.82462	0.0413101	-7.02307
0.52235	-21.1223	0.905761	-1.95835	0.236109	-12.8372	1	-21.7995		0.5216	-21.6904	0.521446	-21.792	0.521357	-6.58101	0.410782	-21.6079		0.12352	-21.4201	0.122934	-4.68635	0.130585	-4.45606	0.116673	-4.74318		0.27403	-21.3341	0.0830387	-6.55425	0.0828899	-6.60675	0.0826203	-6.77114
0.57023	-21.1218	0.95288	-1.96706	0.330399	-12.7619	0	--		0.56929	-21.6909	0.569102	-21.7922	0.568992	-6.6354	0.490773	-21.6075		0.1647	-21.4203	0.163912	-5.17037	0.174114	-4.67187	0.155565	-4.96205		0.32682	-21.334	0.124558	-6.64955	0.124335	-6.69181	0.12393	-6.87798
0.62338	-21.1223	1	-2.43886	0.409169	-12.8891	0	-21.7994		0.62223	-21.6903	0.622	-21.7919	0.621866	-6.58708	0.570763	-21.6075		0.20544	-21.4208	0.204886	-4.83071	0.211924	-4.916	0.198981	-4.63775		0.37306	-21.3347	0.166077	-6.57091	0.16578	-6.60519	0.165241	-6.77931
0.67654	-21.1225	0	--	0.487938	-12.9718	0.0546755	-21.7974		0.67517	-21.6898	0.674899	-21.791	0.674741	-6.53683	0.650673	-21.6075		0.24617	-21.4214	0.245861	-4.54462	0.249735	-4.59939	0.242397	-4.67089		0.4193	-21.3337	0.20639	-6.53842	0.20619	-6.56594	0.205814	-6.74718
0.72969	-21.1221	0	-1.97818	0.566708	-13.0079	0.109351	-21.7954		0.72811	-21.6893	0.727797	-21.7906	0.727616	-6.43274	0.730584	-21.6079		0.28691	-21.422	0.286835	-4.2707	0.287546	-4.36322	0.285813	-4.51493		0.46554	-21.3328	0.246703	-6.5423	0.2466	-6.56051	0.246388	-6.72568
0.77667	-21.1221	0.0471196	-1.96147	0.645398	-12.9719	0.164027	-21.7937		0.77451	-21.6891	0.774081	-21.7911	0.773832	-6.70695	0.801561	-21.6076		0.32765	-21.4224	0.32781	-4.04857	0.325357	-4.24925	0.329229	-4.24451		0.51178	-21.3322	0.287015	-6.60241	0.28701	-6.61677	0.286962	-6.75042
0.82366	-21.1221	0.0942392	-1.93603	0.724089	-12.8894	0.218702	-21.7956		0.82091	-21.6888	0.820365	-21.7909	0.820048	-6.8285	0.872539	-21.6074		0.37398	-21.4219	0.366441	-4.11175	0.363794	-4.47496	0.368085	-4.33162		0.55802	-21.3321	0.327328	-6.79873	0.32742	-6.83855	0.327536	-6.99784
0.87064	-21.1223	0.141359	-1.89133	0.791135	-12.8801	0.273378	-21.7976		0.86731	-21.6886	0.86665	-21.7908	0.866263	-6.83475	0.936269	-21.6073		0.42032	-21.4211	0.405072	-4.4812	0.402231	-4.49458	0.406941	-4.3188		0.60935	-21.3323	0.373636	-6.77804	0.373728	-6.82352	0.373857	-6.99785
0.91376	-21.1221	0.188659	-2.13063	0.85818	-13.0617	0.328053	-21.7997		0.91154	-21.689	0.9111	-21.7912	0.910842	-6.77	1	-21.6075		0.46666	-21.4202	0.443704	-4.67377	0.440668	-4.4633	0.445797	-4.37323		0.66068	-21.3329	0.419944	-6.63534	0.420035	-6.71826	0.420179	-6.90062
0.95688	-21.1219	0.235958	-2.09677	0.92909	-13.0352	0.385369	-21.7977		0.95577	-21.69	0.95555	-21.7917	0.955421	-6.61846	0	--		0.51299	-21.4197	0.482335	-4.54277	0.479105	-4.51855	0.484653	-4.58203		0.71201	-21.334	0.466253	-6.68145	0.466343	-6.73714	0.4665	-6.90477
1	-21.1218	0.283258	-2.29027	1	-13.0079	0.442684	-21.7956		1	-21.6909	1	-21.7922	1	-6.6354	0	-21.6067		0.55933	-21.4193	0.520967	-4.54063	0.517542	-4.53753	0.523509	-4.29406		0.75185	-21.3346	0.512561	-6.72666	0.51265	-6.81945	0.512822	-7.00249
0	--	0.330558	-2.69759	0	--	0.5	-21.7937		0	--	0	--	0	--	0.0637306	-21.6072		0.61076	-21.4198	0.559598	-4.77913	0.555979	-4.22376	0.562365	-3.85345		0.7917	-21.3346	0.55887	-6.79214	0.558958	-6.86885	0.559143	-7.06444
0	-21.1218	0.389612	-2.14339	0	-12.9745	0.554676	-21.7955		0	-21.6893	0	-21.7899	0	-6.55452	0.127461	-21.6073		0.6622	-21.4203	0.598191	-4.54107	0.594377	-4.53712	0.601182	-4.29356		0.83155	-21.3343	0.597421	-6.73339	0.597509	-6.8291	0.597706	-7.01238
0.04312	-21.1219	0.448667	-2.21784	0.0709098	-13.0012	0.609351	-21.7976		0.04423	-21.6892	0.0444501	-21.79	0.0445789	-6.45475	0.195238	-21.6073		0.71363	-21.4214	0.636783	-4.54167	0.632776	-4.51926	0.64	-4.58249		0.87366	-21.3344	0.635973	-6.70486	0.63606	-6.79137	0.636269	-6.97919
0.08624	-21.1221	0.507721	-2.05372	0.14182	-12.8844	0.664027	-21.7992		0.08846	-21.689	0.0889002	-21.7903	0.0891577	-6.22714	0.263015	-21.6074		0.75419	-21.4211	0.675376	-4.67421	0.671174	-4.46342	0.678817	-4.37362		0.91577	-21.3332	0.674525	-6.66457	0.674611	-6.70083	0.674831	-6.84186
0.12936	-21.1219	0.566775	-1.97818	0.236109	-12.7937	0.718702	-21.7973		0.13269	-21.6886	0.13335	-21.7907	0.133737	-5.98236	0.330792	-21.6084		0.79475	-21.4206	0.713969	-4.48428	0.709573	-4.49434	0.717634	-4.31875		0.95789	-21.3323	0.713076	-6.68236	0.713162	-6.726	0.713394	-6.89372
0.17972	-21.1219	0.619216	-2.13283	0.330399	-12.7489	0.773378	-21.7954		0.18222	-21.6888	0.182718	-21.7907	0.183007	-6.00297	0.410782	-21.607		0.8353	-21.4203	0.754675	-4.63076	0.748344	-4.39079	0.759901	-4.55994		1	-21.3321	0.753358	-6.64231	0.753515	-6.67345	0.753849	-6.8272
0.23009	-21.1218	0.671656	-2.1447	0.409169	-12.6502	0.828053	-21.7936		0.23176	-21.689	0.232086	-21.7909	0.232277	-6.0679	0.490773	-21.607		0.87648	-21.4201	0.795382	-4.71944	0.787115	-4.81295	0.802168	-4.51955		0	--	0.793641	-6.59988	0.793867	-6.63239	0.794304	-6.7964
0.28045	-21.1216	0.724096	-2.21851	0.487938	-12.8256	0.885369	-21.7954		0.28129	-21.6888	0.281454	-21.791	0.281547	-6.18351	0.570763	-21.6067		0.91765	-21.42	0.836088	-5.17037	0.825886	-4.67187	0.844435	-4.96205		0	-21.3316	0.833923	-6.57091	0.83422	-6.60519	0.834759	-6.77931
0.33082	-21.1216	0.768944	-2.00508	0.566708	-12.9745	0.942684	-21.7974		0.33083	-21.6886	0.330822	-21.791	0.330817	-6.35166	0.650673	-21.607		0.95883	-21.4197	0.877066	-4.68635	0.869415	-4.45606	0.883327	-4.74318		0.04211	-21.332	0.875442	-6.64955	0.875665	-6.69181	0.87607	-6.87798
0.3787	-21.1214	0.813793	-2.07382	0.645398	-12.8259	1	-21.7994		0.37852	-21.6886	0.378478	-21.7907	0.378452	-6.35443	0.730584	-21.607		1	-21.4193	0.918044	-4.55229	0.912943	-4.17736	0.922218	-4.3203		0.08423	-21.333	0.916961	-6.55425	0.91711	-6.60675	0.91738	-6.77114
0.42658	-21.1213	0.858641	-1.89133	0.724089	-12.6503	0	--		0.42621	-21.6893	0.426134	-21.7905	0.426087	-6.39341	0.801561	-21.6075		0	--	0.959022	-4.61828	0.956472	-4.20081	0.961109	-4.50517		0.12634	-21.3343	0.958481	-6.77304	0.958555	-6.82462	0.95869	-7.02307
0.47447	-21.1213	0.905761	-1.93603	0.791135	-12.8352	0	-21.791		0.47391	-21.6894	0.47379	-21.7902	0.473722	-6.46096	0.872539	-21.6073		0	-21.4192	1	-4.77913	1	-4.22376	1	-3.85345		0.16845	-21.3342	1	-6.79214	1	-6.86885	1	-7.06444
0.52235	-21.1215	0.95288	-1.96147	0.85818	-12.8844	0.0546755	-21.7913		0.5216	-21.6893	0.521446	-21.79	0.521357	-6.54705	0.936269	-21.6072		0.04117	-21.4195	0	--	0	--	0	--		0.22124	-21.3341	0	--	0	--	0	--
0.57023	-21.1218	1	-1.97818	0.92909	-13.0012	0.109351	-21.7922		0.56929	-21.6893	0.569102	-21.7899	0.568992	-6.55452	1	-21.6067		0.08235	-21.4198	0	-4.47678	0	-3.83979	0	-3.83004		0.27403	-21.334	0	-6.76172	0	-6.84335	0	-7.04633
0.62338	-21.1215	0	--	1	-12.9745	0.164027	-21.7936		0.62223	-21.6894	0.622	-21.79	0.621866	-6.53698	0	--		0.12352	-21.4198	0.040978	-4.31891	0.0435284	-3.92095	0.0388911	-3.81416		0.32682	-21.3339	0.0415193	-6.63739	0.0414449	-6.7003	0.0413101	-6.85175
0.67654	-21.1213	0	-1.97261	0	--	0.218702	-21.7922		0.67517	-21.6894	0.674899	-21.7903	0.674741	-6.44415	0	-21.6062		0.1647	-21.4202	0.081956	-4.25194	0.0870568	-4.13542	0.0777823	-4.07895		0.37306	-21.3346	0.0830387	-6.5252	0.0828899	-6.56455	0.0826203	-6.70732
0.72969	-21.1213	0.0471196	-1.91637	0	-12.4441	0.273378	-21.7913		0.72811	-21.6892	0.727797	-21.7906	0.727616	-6.37693	0.0637306	-21.6069		0.20544	-21.4198	0.122934	-4.4632	0.130585	-4.13902	0.116673	-3.84216		0.4193	-21.3335	0.124558	-6.51219	0.124335	-6.54668	0.12393	-6.70241
0.77667	-21.1216	0.0942392	-1.93044	0.0709098	-12.5681	0.328053	-21.791		0.77451	-21.689	0.774081	-21.7907	0.773832	-6.21127	0.127461	-21.6068		0.24617	-21.4193	0.163912	-4.22027	0.174114	-4.61416	0.155565	-3.40767		0.46554	-21.3326	0.166077	-6.56134	0.16578	-6.60493	0.165241	-6.77761
0.82366	-21.1219	0.141359	-1.88579	0.14182	-12.8844	0.385369	-21.7913		0.82091	-21.6886	0.820365	-21.7907	0.820048	-6.08019	0.195238	-21.6072		0.28691	-21.4186	0.204886	-4.68846	0.211924	-4.142	0.198981	-4.02422		0.51178	-21.3319	0.20639	-6.50127	0.20619	-6.56546	0.205814	-6.74615
0.87064	-21.1219	0.188659	-1.73072	0.236109	-12.777	0.442684	-21.7922		0.86731	-21.6886	0.86665	-21.7907	0.866263	-5.98236	0.263015	-21.6052		0.32765	-21.4177	0.245861	-4.25054	0.249735	-4.11935	0.242397	-4.02276		0.55802	-21.3316	0.246703	-6.50892	0.2466	-6.55999	0.246388	-6.72489
0.91376	-21.1221	0.235958	-1.76062	0.330399	-12.7489	0.5	-21.7936		0.91154	-21.689	0.9111	-21.7903	0.910842	-6.22714	0.330792	-21.6075		0.37398	-21.4192	0.286835	-3.884	0.287546	-4.1873	0.285813	-3.86445		0.60935	-21.3319	0.287015	-6.58207	0.28701	-6.61614	0.286962	-6.74958
0.95688	-21.1219	0.283258	-1.99264	0.409169	-12.6156	0.554676	-21.7922		0.95577	-21.6892	0.95555	-21.79	0.955421	-6.45475	0.410782	-21.6059		0.42032	-21.42	0.32781	-4.0477	0.325357	-4.23745	0.329229	-4.22636		0.66068	-21.3327	0.327328	-6.78309	0.32742	-6.83834	0.327536	-6.99614
1	-21.1218	0.330558	-1.86443	0.487938	-12.493	0.609351	-21.7913		1	-21.6893	1	-21.7899	1	-6.55452	0.490773	-21.607		0.46666	-21.42	0.366441	-4.11162	0.363794	-3.98855	0.368085	-4.08684		0.71201	-21.3339	0.373636	-6.50259	0.373728	-6.58149	0.373857	-6.79114
0	--	0.389612	-2.12775	0.566708	-12.4441	0.664027	-21.791		0	--	0	--	0	--	0.570763	-21.6062		0.51299	-21.4195	0.405072	-4.28629	0.402231	-4.17256	0.406941	-4.22104		0.75185	-21.3345	0.419944	-6.62038	0.420035	-6.66219	0.420179	-6.82517
0	-21.1207	0.448667	-1.88696	0.645398	-12.4929	0.718702	-21.7913		0	-21.6893	0	-21.7899	0	-5.52556	0.650673	-21.607		0.55933	-21.4192	0.443704	-4.53305	0.440668	-4.19721	0.445797	-4.33883		0.7917	-21.3343	0.466253	-6.63006	0.466343	-6.66746	0.4665	-6.8041
0.04312	-21.1209	0.507721	-1.92156	0.724089	-12.6153	0.773378	-21.7922		0.04423	-21.6892	0.0444501	-21.79	0.0445789	-5.58737	0.730584	-21.6059		0.61076	-21.4195	0.482335	-4.37596	0.479105	-4.39557	0.484653	-4.27721		0.83155	-21.3342	0.512561	-6.65448	0.51265	-6.71311	0.512822	-6.85832
0.08624	-21.1213	0.566775	-1.97261	0.791135	-12.749	0.828053	-21.7936		0.08846	-21.6889	0.0889002	-21.7902	0.0891577	-5.75416	0.801561	-21.6072		0.6622	-21.42	0.520967	-4.45146	0.517542	-3.60685	0.523509	-3.82009		0.87366	-21.3343	0.55887	-6.76172	0.558958	-6.84335	0.559143	-7.04633
0.12936	-21.1219	0.619216	-1.89593	0.85818	-12.8844	0.885369	-21.7922		0.13269	-21.6886	0.13335	-21.7907	0.133737	-5.98235	0.872539	-21.6068		0.71363	-21.4198	0.559598	-4.47678	0.555979	-3.83979	0.562365	-3.83004		0.91577	-21.333	0.597421	-6.67312	0.597509	-6.73786	0.597706	-6.89132
0.17972	-21.1219	0.671656	-1.88034	0.92909	-12.5681	0.942684	-21.7913		0.18222	-21.6888	0.182718	-21.7907	0.183007	-6.00296	0.936269	-21.6069		0.75419	-21.4199	0.598191	-4.45151	0.594377	-3.60691	0.601182	-3.82017		0.95789	-21.332	0.635973	-6.62207	0.63606	-6.66394	0.636269	-6.79962
0.23009	-21.1218	0.724096	-1.9236	1	-12.4441	1	-21.791		0.23176	-21.689	0.232086	-21.7909	0.232277	-6.06788	1	-21.6062		0.79475	-21.42	0.636783	-4.37616	0.632776	-4.39411	0.64	-4.27566		1	-21.3316	0.674525	-6.57382	0.674611	-6.63103	0.674831	-6.79859
0.28045	-21.1216	0.768944	-1.8646	0	--	0	--		0.28129	-21.6888	0.281454	-21.791	0.281547	-6.18348	0	--		0.8353	-21.4202	0.675376	-4.53381	0.671174	-4.19781	0.678817	-4.33946		0	--	0.713076	-6.5995	0.713162	-6.68267	0.713394	-6.89116
0.33082	-21.1216	0.813793	-1.74296	0	-9.9472	0	-21.7384		0.33083	-21.6886	0.330822	-21.791	0.330817	-6.35165	0	-21.6057		0.87648	-21.4198	0.713969	-4.28717	0.709573	-4.17579	0.717634	-4.22414		0	-21.3315	0.753358	-6.49576	0.753515	-6.54719	0.753849	-6.72606
0.3787	-21.1213	0.858641	-1.88579	0.0709098	-9.83328	0.0546755	-21.7382		0.37852	-21.6886	0.378478	-21.7907	0.378452	-6.0764	0.0637306	-21.6064		0.91765	-21.4198	0.754675	-4.61316	0.748344	-4.23703	0.759901	-4.38666		0.04211	-21.3317	0.793641	-6.50097	0.793867	-6.53615	0.794304	-6.7126
0.42658	-21.1211	0.905761	-1.93044	0.14182	-9.53097	0.109351	-21.7377		0.42621	-21.6892	0.426134	-21.7905	0.426087	-5.84423	0.127461	-21.6067		0.95883	-21.4195	0.795382	-4.61215	0.787115	-4.34292	0.802168	-4.07388		0.08423	-21.3324	0.833923	-6.56134	0.83422	-6.60493	0.834759	-6.77761
0.47447	-21.1209	0.95288	-1.91637	0.236109	-9.62327	0.164027	-21.737		0.47391	-21.6893	0.47379	-21.7902	0.473722	-5.66961	0.195238	-21.6072		1	-21.4192	0.836088	-4.22027	0.825886	-4.61416	0.844435	-3.40767		0.12634	-21.3333	0.875442	-6.51219	0.875665	-6.54668	0.87607	-6.70241
0.52235	-21.1208	1	-1.97261	0.330399	-9.09144	0.218702	-21.7363		0.5216	-21.6893	0.521446	-21.79	0.521357	-5.56188	0.263015	-21.6052		0	--	0.877066	-4.4632	0.869415	-4.13902	0.883327	-3.84216		0.16845	-21.3339	0.916961	-6.5252	0.91711	-6.56455	0.91738	-6.70732
0.57023	-21.1207	0	--	0.409169	-9.54737	0.273378	-21.7359		0.56929	-21.6893	0.569102	-21.7899	0.568992	-5.52556	0.330792	-21.6075		0	-21.419	0.918044	-4.25194	0.912943	-4.13542	0.922218	-4.07895		0.22124	-21.3339	0.958481	-6.63739	0.958555	-6.7003	0.95869	-6.85175
0.62338	-21.1208	0	-1.8787	0.487938	-9.83811	0.328053	-21.7358		0.62223	-21.6893	0.622	-21.79	0.621866	-5.57028	0.410782	-21.605		0.04117	-21.4183	0.959022	-4.31891	0.956472	-3.92095	0.961109	-3.81416		0.27403	-21.3339	1	-6.76172	1	-6.84335	1	-7.04633
0.67654	-21.1209	0.0471196	-1.88925	0.566708	-9.9472	0.385369	-21.7358		0.67517	-21.6893	0.674899	-21.7903	0.674741	-5.70253	0.490773	-21.6069		0.08235	-21.419	1	-4.47678	1	-3.83979	1	-3.83004		0.32682	-21.3339	0	--	0	--	0	--
0.72969	-21.1212	0.0942392	-1.8437	0.645398	-9.83831	0.442684	-21.7358		0.72811	-21.6891	0.727797	-21.7905	0.727616	-5.9151	0.570763	-21.6057		0.12352	-21.4197	0	--	0	--	0	--		0.37306	-21.3332	0	-6.75828	0	-6.84318	0	-7.0431
0.77667	-21.1214	0.141359	-1.88578	0.724089	-9.54813	0.5	-21.7358		0.77451	-21.6888	0.774081	-21.7906	0.773832	-5.89376	0.650673	-21.6069		0.1647	-21.4202	0	-4.47667	0	-3.58475	0	-3.78956		0.4193	-21.3326	0.0415193	-6.63387	0.0414449	-6.69945	0.0413101	-6.84914
0.82366	-21.1217	0.188659	-1.72998	0.791135	-9.73097	0.554676	-21.7361		0.82091	-21.6886	0.820365	-21.7906	0.820048	-5.91866	0.730584	-21.605		0.20544	-21.4198	0.040978	-4.31589	0.0435284	-3.64874	0.0388911	-3.7309		0.46554	-21.3321	0.0830387	-6.52346	0.0828899	-6.5628	0.0826203	-6.70423
0.87064	-21.1219	0.235958	-1.7605	0.85818	-9.53097	0.609351	-21.7365		0.86731	-21.6886	0.86665	-21.7907	0.866263	-5.98235	0.801561	-21.6071		0.24617	-21.4193	0.081956	-3.93963	0.0870568	-4.01488	0.0777823	-4.07569		0.51178	-21.3316	0.124558	-6.5116	0.124335	-6.54452	0.12393	-6.70089
0.91376	-21.1213	0.283258	-1.99225	0.92909	-9.83328	0.664027	-21.7369		0.91154	-21.6889	0.9111	-21.7902	0.910842	-5.75416	0.872539	-21.6067		0.28691	-21.4186	0.122934	-4.11625	0.130585	-4.05016	0.116673	-3.68404		0.55802	-21.3315	0.166077	-6.53346	0.16578	-6.57109	0.165241	-6.757
0.95688	-21.1209	0.330558	-1.86418	1	-9.9472	0.718702	-21.7371		0.95577	-21.6892	0.95555	-21.79	0.955421	-5.58737	0.936269	-21.6064		0.32765	-21.4177	0.163912	-4.21977	0.174114	-4.61399	0.155565	-3.39828		0.60935	-21.3317	0.20639	-6.48243	0.20619	-6.51524	0.205814	-6.68892
1	-21.1207	0.389612	-1.87696	0	--	0.773378	-21.7371		1	-21.6893	1	-21.7899	1	-5.52556	1	-21.6057		0.37398	-21.4178	0.204886	-4.68785	0.211924	-4.14033	0.198981	-4.01878		0.66068	-21.3322	0.246703	-6.40096	0.2466	-6.43482	0.246388	-6.61108
0	--	0.448667	-1.88029	0	-9.9347	0.828053	-21.737		0	--	0	--	0	--	0	--		0.42032	-21.419	0.245861	-4.24818	0.249735	-4.1126	0.242397	-4.01732		0.71201	-21.3328	0.287015	-6.33953	0.28701	-6.38411	0.286962	-6.57034
0	-21.1118	0.507721	-1.87951	0.0709098	-9.81454	0.885369	-21.7376		0	-21.6892	0	-21.7892	0	-4.85976	0	-21.6056		0.46666	-21.4199	0.286835	-3.88316	0.287546	-4.17969	0.285813	-3.8498		0.75185	-21.3333	0.327328	-6.29756	0.32742	-6.36167	0.327536	-6.56549
0.04312	-21.1117	0.566775	-1.8787	0.14182	-9.53096	0.942684	-21.7382		0.04423	-21.6891	0.0444501	-21.7892	0.0445789	-4.71771	0.0637306	-21.6063		0.51299	-21.4187	0.32781	-4.04761	0.325357	-4.23735	0.329229	-4.22611		0.7917	-21.3338	0.373636	-6.48962	0.373728	-6.53665	0.373857	-6.68255
0.08624	-21.1114	0.619216	-1.87937	0.236109	-9.61315	1	-21.7384		0.08846	-21.6888	0.0889002	-21.7892	0.0891577	-4.34192	0.127461	-21.6065		0.55933	-21.419	0.366441	-3.88285	0.363794	-3.85121	0.368085	-3.92064		0.83155	-21.3339	0.419944	-6.48491	0.420035	-6.54899	0.420179	-6.71855
0.12936	-21.111	0.671656	-1.82407	0.330399	-9.09143	0	--		0.13269	-21.6884	0.13335	-21.7892	0.133737	-4.17905	0.195238	-21.6069		0.61076	-21.4188	0.405072	-4.28607	0.402231	-3.96256	0.406941	-4.11681		0.87366	-21.3333	0.466253	-6.41036	0.466343	-6.44016	0.4665	-6.61851
0.17972	-21.1108	0.724096	-1.91744	0.409169	-9.39132	0	-21.7383		0.18222	-21.6884	0.182718	-21.7894	0.183007	-4.295	0.263015	-21.6046		0.6622	-21.4199	0.443704	-4.53277	0.440668	-4.02927	0.445797	-4.18887		0.91577	-21.3324	0.512561	-6.62209	0.51265	-6.66339	0.512822	-6.85474
0.23009	-21.11	0.768944	-1.7429	0.487938	-9.64097	0.0546755	-21.7381		0.23176	-21.6885	0.232086	-21.7898	0.232277	-4.31667	0.330792	-21.6075		0.71363	-21.4186	0.482335	-4.02426	0.479105	-3.48434	0.484653	-3.65512		0.95789	-21.3317	0.55887	-6.75828	0.558958	-6.84318	0.559143	-7.0431
0.28045	-21.1089	0.813793	-1.7423	0.566708	-9.9347	0.109351	-21.7376		0.28129	-21.6886	0.281454	-21.7902	0.281547	-4.21362	0.410782	-21.6049		0.75419	-21.4187	0.520967	-4.22872	0.517542	-3.58669	0.523509	-3.7347		1	-21.3315	0.597421	-6.65474	0.597509	-6.69794	0.597706	-6.8881
0.33082	-21.1075	0.858641	-1.88578	0.645398	-9.64154	0.164027	-21.737		0.33083	-21.6878	0.330822	-21.7899	0.330817	-3.9735	0.490773	-21.6068		0.79475	-21.4196	0.559598	-4.47667	0.555979	-3.58475	0.562365	-3.78956		0	--	0.635973	-6.48105	0.63606	-6.51598	0.636269	-6.699
0.3787	-21.1088	0.905761	-1.8437	0.724089	-9.39149	0.218702	-21.7363		0.37852	-21.6886	0.378478	-21.7904	0.378452	-4.239	0.570763	-21.6056		0.8353	-21.4202	0.598191	-4.22918	0.594377	-3.5859	0.601182	-3.73476		0	-21.3312	0.674525	-6.51635	0.674611	-6.55108	0.674831	-6.70474
0.42658	-21.11	0.95288	-1.88925	0.791135	-9.56866	0.273378	-21.7358		0.42621	-21.6891	0.426134	-21.7902	0.426087	-4.39543	0.650673	-21.6068		0.87648	-21.4197	0.636783	-4.02267	0.632776	-3.48489	0.64	-3.65533		0.04211	-21.3315	0.713076	-6.44197	0.713162	-6.51304	0.713394	-6.68726
0.47447	-21.1109	1	-1.8787	0.85818	-9.53096	0.328053	-21.7358		0.47391	-21.6892	0.47379	-21.7898	0.473722	-4.60459	0.730584	-21.6049		0.91765	-21.419	0.675376	-4.53352	0.671174	-4.02687	0.678817	-4.18657		0.08423	-21.3322	0.753358	-6.37065	0.753515	-6.40331	0.753849	-6.57706
0.52235	-21.1115	0	--	0.92909	-9.81454	0.385369	-21.7358		0.5216	-21.6892	0.521446	-21.7894	0.521357	-4.79327	0.801561	-21.607		0.95883	-21.4183	0.713969	-4.28695	0.709573	-3.96301	0.717634	-4.11735		0.12634	-21.333	0.793641	-6.48384	0.793867	-6.52335	0.794304	-6.69267
0.57023	-21.1118	0	-1.79471	1	-9.9347	0.442684	-21.7358		0.56929	-21.6892	0.569102	-21.7892	0.568992	-4.85976	0.872539	-21.6065		1	-21.419	0.754675	-4.08965	0.748344	-4.17692	0.759901	-3.84785		0.16845	-21.3338	0.833923	-6.53346	0.83422	-6.57109	0.834759	-6.757
0.62338	-21.1115	0.0471196	-1.80728	0	--	0.5	-21.7357		0.62223	-21.6892	0.622	-21.7894	0.621866	-4.77813	0.936269	-21.6063		0	--	0.795382	-4.49522	0.787115	-4.03606	0.802168	-3.79056		0.22124	-21.3338	0.875442	-6.5116	0.875665	-6.54452	0.87607	-6.70089
0.67654	-21.1107	0.0942392	-1.83825	0	-8.99315	0.554676	-21.7361		0.67517	-21.6892	0.674899	-21.7899	0.674741	-4.54899	1	-21.6056		0	-21.4177	0.836088	-4.21977	0.825886	-4.61399	0.844435	-3.39828		0.27403	-21.3338	0.916961	-6.52346	0.91711	-6.5628	0.91738	-6.70423
0.72969	-21.1096	0.141359	-1.43153	0.0709098	-9.17093	0.609351	-21.7365		0.72811	-21.6889	0.727797	-21.7903	0.727616	-4.35624	0	--		0.04117	-21.4182	0.877066	-4.11625	0.869415	-4.05016	0.883327	-3.68404		0.32682	-21.3338	0.958481	-6.63387	0.958555	-6.69945	0.95869	-6.84914
0.77667	-21.1105	0.188659	-1.46098	0.14182	-9.50228	0.664027	-21.7369		0.77451	-21.6888	0.774081	-21.7898	0.773832	-4.38427	0	-21.6056		0.08235	-21.4189	0.918044	-3.93963	0.912943	-4.01488	0.922218	-4.07569		0.37306	-21.3331	1	-6.75828	1	-6.84318	1	-7.0431
0.82366	-21.1109	0.235958	-1.58592	0.236109	-8.8713	0.718702	-21.7371		0.82091	-21.6886	0.820365	-21.7894	0.820048	-4.31724	0.0637306	-21.6058		0.12352	-21.4194	0.959022	-4.31589	0.956472	-3.64874	0.961109	-3.7309		0.4193	-21.3325	0	--	0	--	0	--
0.87064	-21.111	0.283258	-1.73553	0.330399	-9.07976	0.773378	-21.7371		0.86731	-21.6884	0.86665	-21.7892	0.866263	-4.17905	0.127461	-21.6064		0.1647	-21.4184	1	-4.47667	1	-3.58475	1	-3.78956		0.46554	-21.3319	0	-6.11445	0	-6.11312	0	-6.21256
0.91376	-21.1114	0.330558	-1.86346	0.409169	-8.88255	0.828053	-21.7369		0.91154	-21.6888	0.9111	-21.7892	0.910842	-4.34192	0.195238	-21.6069		0.20544	-21.4182	0	--	0	--	0	--		0.51178	-21.3314	0.0415193	-6.2101	0.0414449	-6.21917	0.0413101	-6.33284
0.95688	-21.1117	0.389612	-1.83126	0.487938	-9.2919	0.885369	-21.7376		0.95577	-21.6891	0.95555	-21.7892	0.955421	-4.71771	0.263015	-21.6045		0.24617	-21.4177	0	-3.70069	0	-3.49229	0	-3.77917		0.55802	-21.3312	0.0830387	-6.45338	0.0828899	-6.48454	0.0826203	-6.62676
1	-21.1118	0.448667	-1.83241	0.566708	-8.99315	0.942684	-21.7381		1	-21.6892	1	-21.7892	1	-4.85976	0.330792	-21.6074		0.28691	-21.4171	0.040978	-4.04964	0.0435284	-3.50638	0.0388911	-3.71439		0.60935	-21.3314	0.124558	-6.22098	0.124335	-6.27351	0.12393	-6.43107
0	--	0.507721	-1.80318	0.645398	-9.29165	1	-21.7383		0	--	0	--	0	--	0.410782	-21.6047		0.32765	-21.4177	0.081956	-3.93407	0.0870568	-3.74983	0.0777823	-3.71725		0.66068	-21.332	0.166077	-6.50171	0.16578	-6.57052	0.165241	-6.7557
0	-21.1097	0.566775	-1.79471	0.724089	-8.88437	0	--		0	-21.6892	0	-21.7892	0	-4.4816	0.490773	-21.6065		0.37398	-21.4177	0.122934	-3.91341	0.130585	-4.03795	0.116673	-3.55687		0.71201	-21.3327	0.20639	-6.47112	0.20619	-6.51484	0.205814	-6.68719
0.04312	-21.1101	0.619216	-1.80105	0.791135	-9.27716	0	-21.7355		0.04423	-21.689	0.0444501	-21.7892	0.0445789	-4.35588	0.570763	-21.6056		0.42032	-21.418	0.163912	-3.71605	0.174114	-3.96604	0.155565	-3.3399		0.75185	-21.3331	0.246703	-6.38393	0.2466	-6.43462	0.246388	-6.60932
0.08624	-21.1105	0.671656	-1.78481	0.85818	-9.50228	0.0546755	-21.7355		0.08846	-21.6888	0.0889002	-21.7892	0.0891577	-4.24882	0.650673	-21.6065		0.46666	-21.4182	0.204886	-3.71946	0.211924	-4.02143	0.198981	-3.42672		0.7917	-21.3335	0.287015	-6.32012	0.28701	-6.38396	0.286962	-6.56873
0.12936	-21.111	0.724096	-1.87858	0.92909	-9.17093	0.109351	-21.7356		0.13269	-21.6884	0.13335	-21.7891	0.133737	-4.17902	0.730584	-21.6047		0.51299	-21.4185	0.245861	-3.77635	0.249735	-3.59476	0.242397	-3.56935		0.83155	-21.3338	0.327328	-6.28925	0.32742	-6.36148	0.327536	-6.56536
0.17972	-21.1107	0.768944	-1.72945	1	-8.99315	0.164027	-21.7356		0.18222	-21.6884	0.182718	-21.7894	0.183007	-4.29497	0.801561	-21.6067		0.55933	-21.4177	0.286835	-3.79958	0.287546	-3.00592	0.285813	-3.26032		0.87366	-21.333	0.373636	-6.38869	0.373728	-6.48346	0.373857	-6.6807
0.23009	-21.11	0.813793	-1.62492	0	--	0.218702	-21.7357		0.23176	-21.6885	0.232086	-21.7898	0.232277	-4.31663	0.872539	-21.6064		0.61076	-21.4185	0.32781	-3.63609	0.325357	-2.57282	0.329229	-2.90262		0.91577	-21.3322	0.419944	-6.21725	0.420035	-6.24616	0.420179	-6.41485
0.28045	-21.1089	0.858641	-1.43153	0	-8.9521	0.273378	-21.7357		0.28129	-21.6886	0.281454	-21.7902	0.281547	-4.21357	0.936269	-21.6058		0.6622	-21.4181	0.366441	-3.77946	0.363794	-3.27988	0.368085	-3.36204		0.95789	-21.3315	0.466253	-6.40181	0.466343	-6.43123	0.4665	-6.57362
0.33082	-21.1075	0.905761	-1.83825	0.0709098	-9.1338	0.328053	-21.7356		0.33083	-21.6878	0.330822	-21.7899	0.330817	-3.97349	1	-21.6056		0.71363	-21.4179	0.405072	-4.07999	0.402231	-3.49116	0.406941	-3.60958		1	-21.3312	0.512561	-6.20138	0.51265	-6.21	0.512822	-6.32469
0.3787	-21.1085	0.95288	-1.80728	0.14182	-9.50227	0.385369	-21.7356		0.37852	-21.6886	0.378478	-21.7904	0.378452	-4.09988	0	--		0.75419	-21.4186	0.443704	-4.25171	0.440668	-3.25489	0.445797	-3.52481		0	--	0.55887	-6.11445	0.558958	-6.11312	0.559143	-6.21256
0.42658	-21.1092	1	-1.79471	0.236109	-8.86941	0.442684	-21.7356		0.42621	-21.689	0.426134	-21.7902	0.426087	-4.31808	0	-21.6055		0.79475	-21.4187	0.482335	-4.02346	0.479105	-3.38307	0.484653	-3.59556		0	-21.3301	0.597421	-6.17595	0.597509	-6.1818	0.597706	-6.29231
0.47447	-21.1096	0	--	0.330399	-9.07976	0.5	-21.7357		0.47391	-21.6891	0.47379	-21.7897	0.473722	-4.44167	0.0637306	-21.6057		0.8353	-21.4184	0.520967	-4.00517	0.517542	-3.53591	0.523509	-3.69361		0.04211	-21.3301	0.635973	-6.33018	0.63606	-6.35115	0.636269	-6.48424
0.52235	-21.1098	0	-1.79064	0.409169	-8.46389	0.554676	-21.7355		0.5216	-21.6891	0.521446	-21.7893	0.521357	-4.42072	0.127461	-21.6058		0.87648	-21.4194	0.559598	-3.70069	0.555979	-3.49229	0.562365	-3.77917		0.08423	-21.3302	0.674525	-6.30373	0.674611	-6.3332	0.674831	-6.50601
0.57023	-21.1097	0.0471196	-1.80238	0.487938	-8.61487	0.609351	-21.7355		0.56929	-21.6892	0.569102	-21.7892	0.568992	-4.4816	0.195238	-21.6061		0.91765	-21.4189	0.598191	-4.00468	0.594377	-3.53622	0.601182	-3.69381		0.12634	-21.3302	0.713076	-6.24861	0.713162	-6.29843	0.713394	-6.44342
0.62338	-21.1098	0.0942392	-1.27971	0.566708	-8.9521	0.664027	-21.7357		0.62223	-21.6891	0.622	-21.7894	0.621866	-4.40671	0.263015	-21.6039		0.95883	-21.4182	0.636783	-4.02186	0.632776	-3.38331	0.64	-3.59636		0.16845	-21.3301	0.753358	-6.25197	0.753515	-6.31791	0.753849	-6.4824
0.67654	-21.1096	0.141359	-1.43148	0.645398	-8.61522	0.718702	-21.7361		0.67517	-21.6891	0.674899	-21.7899	0.674741	-4.44047	0.330792	-21.6035		1	-21.4177	0.675376	-4.25215	0.671174	-3.25451	0.678817	-3.52528		0.22124	-21.3301	0.793641	-6.29377	0.793867	-6.33018	0.794304	-6.50083
0.72969	-21.109	0.188659	-1.46034	0.724089	-8.46255	0.773378	-21.7365		0.72811	-21.6889	0.727797	-21.7903	0.727616	-4.20704	0.410782	-21.6044		0	--	0.713969	-4.08078	0.709573	-3.48989	0.717634	-3.60841		0.27403	-21.3299	0.833923	-6.50171	0.83422	-6.57052	0.834759	-6.7557
0.77667	-21.11	0.235958	-1.58555	0.791135	-8.98746	0.828053	-21.7369		0.77451	-21.6888	0.774081	-21.7898	0.773832	-4.24013	0.490773	-21.6057		0	-21.4175	0.754675	-3.85132	0.748344	-3.80933	0.759901	-3.69334		0.32682	-21.3294	0.875442	-6.22098	0.875665	-6.27351	0.87607	-6.43107
0.82366	-21.1107	0.283258	-1.7349	0.85818	-9.50227	0.885369	-21.7362		0.82091	-21.6885	0.820365	-21.7893	0.820048	-4.24972	0.570763	-21.6055		0.04117	-21.4181	0.795382	-3.88867	0.787115	-3.98725	0.802168	-3.59445		0.37306	-21.3297	0.916961	-6.45338	0.91711	-6.48454	0.91738	-6.62676
0.87064	-21.111	0.330558	-1.86323	0.92909	-9.1338	0.942684	-21.7357		0.86731	-21.6884	0.86665	-21.7891	0.866263	-4.17902	0.650673	-21.6057		0.08235	-21.4174	0.836088	-3.71605	0.825886	-3.96604	0.844435	-3.3399		0.4193	-21.3299	0.958481	-6.2101	0.958555	-6.21917	0.95869	-6.33284
0.91376	-21.1105	0.389612	-1.74901	1	-8.9521	1	-21.7355		0.91154	-21.6888	0.9111	-21.7892	0.910842	-4.24882	0.730584	-21.6044		0.12352	-21.4174	0.877066	-3.91341	0.869415	-4.03795	0.883327	-3.55687		0.46554	-21.33	1	-6.11445	1	-6.11312	1	-6.21256
0.95688	-21.1101	0.448667	-1.57153	0	--	0	--		0.95577	-21.689	0.95555	-21.7892	0.955421	-4.35588	0.801561	-21.6063		0.1647	-21.4184	0.918044	-3.93407	0.912943	-3.74983	0.922218	-3.71725		0.51178	-21.3301	0	--	0	--	0	--
1	-21.1097	0.507721	-1.74207	0	-7.35055	0	-21.7355		1	-21.6892	1	-21.7892	1	-4.4816	0.872539	-21.6058		0.20544	-21.4182	0.959022	-4.04964	0.956472	-3.50638	0.961109	-3.71439		0.55802	-21.3301	0	-5.52404	0	-5.6929	0	-5.91945
0	--	0.566775	-1.79064	0.0709098	-7.54773	0.0546755	-21.7355		0	--	0	--	0	--	0.936269	-21.6057		0.24617	-21.4177	1	-3.70069	1	-3.49229	1	-3.77917		0.60935	-21.33	0.0415193	-5.52321	0.0414449	-5.68738	0.0413101	-5.90927
0	-21.1097	0.619216	-1.76197	0.14182	-7.58234	0.109351	-21.7356		0	-21.6879	0	-21.7891	0	-4.27588	1	-21.6055		0.28691	-21.4171	0	--	0	--	0	--		0.66068	-21.33	0.0830387	-5.54557	0.0828899	-5.68956	0.0826203	-5.89504
0.04312	-21.1094	0.671656	-1.56219	0.236109	-8.18489	0.164027	-21.7356		0.04423	-21.688	0.0444501	-21.7892	0.0445789	-4.274	0	--		0.32765	-21.4177	0	-2.79989	0	-3.48262	0	-3.76086		0.71201	-21.3298	0.124558	-5.99958	0.124335	-6.02169	0.12393	-6.18231
0.08624	-21.1093	0.724096	-1.77857	0.330399	-7.88415	0.218702	-21.7357		0.08846	-21.6883	0.0889002	-21.7891	0.0891577	-4.24823	0	-21.6055		0.37398	-21.4176	0.040978	-3.17348	0.0435284	-3.47998	0.0388911	-3.36792		0.75185	-21.3301	0.166077	-5.92078	0.16578	-5.97042	0.165241	-6.12936
0.12936	-21.1093	0.768944	-1.54626	0.409169	-8.44039	0.273378	-21.7357		0.13269	-21.6884	0.13335	-21.7891	0.133737	-4.17861	0.0637306	-21.6053		0.42032	-21.4174	0.081956	-3.90305	0.0870568	-3.32859	0.0777823	-3.55815		0.7917	-21.3302	0.20639	-5.95871	0.20619	-6.01277	0.205814	-6.17488
0.17972	-21.1091	0.813793	-1.3171	0.487938	-7.77233	0.328053	-21.7356		0.18222	-21.6884	0.182718	-21.7893	0.183007	-4.00837	0.127461	-21.6058		0.46666	-21.4173	0.122934	-3.827	0.130585	-3.98656	0.116673	-3.22242		0.83155	-21.3301	0.246703	-6.06706	0.2466	-6.13684	0.246388	-6.31418
0.23009	-21.1084	0.858641	-1.43148	0.566708	-7.35055	0.385369	-21.7356		0.23176	-21.6884	0.232086	-21.7897	0.232277	-3.82759	0.195238	-21.606		0.51299	-21.4172	0.163912	-3.71558	0.174114	-3.96588	0.155565	-3.33137		0.87366	-21.3302	0.287015	-6.20111	0.28701	-6.29163	0.286962	-6.50383
0.28045	-21.1075	0.905761	-1.27971	0.645398	-7.77166	0.442684	-21.7356		0.28129	-21.6885	0.281454	-21.7901	0.281547	-3.67587	0.263015	-21.6039		0.55933	-21.4175	0.204886	-3.71901	0.211924	-4.01735	0.198981	-3.42161		0.91577	-21.3302	0.327328	-6.27473	0.32742	-6.35332	0.327536	-6.55963
0.33082	-21.1075	0.95288	-1.80238	0.724089	-8.43885	0.5	-21.7356		0.33083	-21.6877	0.330822	-21.7899	0.330817	-3.97345	0.330792	-21.6035		0.61076	-21.4172	0.245861	-3.77566	0.249735	-3.59276	0.242397	-3.56208		0.95789	-21.3301	0.373636	-6.15626	0.373728	-6.19838	0.373857	-6.37126
0.3787	-21.1073	1	-1.79064	0.791135	-7.88659	0.554676	-21.7355		0.37852	-21.6885	0.378478	-21.7899	0.378452	-3.96471	0.410782	-21.604		0.6622	-21.4173	0.286835	-3.79616	0.287546	-3.0051	0.285813	-3.24901		1	-21.3301	0.419944	-6.12443	0.420035	-6.17846	0.420179	-6.32567
0.42658	-21.1082	0	--	0.85818	-7.58234	0.609351	-21.7355		0.42621	-21.6888	0.426134	-21.7896	0.426087	-4.12845	0.490773	-21.6055		0.71363	-21.4174	0.32781	-3.636	0.325357	-2.57273	0.329229	-2.90256		0	--	0.466253	-5.76392	0.466343	-5.85976	0.4665	-6.03652
0.47447	-21.1089	0	-0.727792	0.92909	-7.54773	0.664027	-21.7357		0.47391	-21.6885	0.47379	-21.7894	0.473722	-4.24298	0.570763	-21.6055		0.75419	-21.417	0.366441	-3.58558	0.363794	-2.80962	0.368085	-3.11925		0	-21.33	0.512561	-5.56063	0.51265	-5.71606	0.512822	-5.93163
0.52235	-21.1094	0.0471196	-0.702923	1	-7.35055	0.718702	-21.7361		0.5216	-21.6881	0.521446	-21.7892	0.521357	-4.39212	0.650673	-21.6055		0.79475	-21.4178	0.405072	-3.50418	0.402231	-3.04685	0.406941	-3.34649		0.04211	-21.3299	0.55887	-5.52404	0.558958	-5.6929	0.559143	-5.91945
0.57023	-21.1097	0.0942392	-0.630115	0	--	0.773378	-21.7365		0.56929	-21.6879	0.569102	-21.7891	0.568992	-4.27588	0.730584	-21.604		0.8353	-21.4184	0.443704	-3.29184	0.440668	-3.2387	0.445797	-3.35943		0.08423	-21.3298	0.597421	-5.54725	0.597509	-5.70753	0.597706	-5.92671
0.62338	-21.1094	0.141359	-0.514902	0	-7.05462	0.828053	-21.7368		0.62223	-21.6882	0.622	-21.7892	0.621866	-4.40146	0.801561	-21.6062		0.87648	-21.4174	0.482335	-3.96299	0.479105	-3.26294	0.484653	-3.34494		0.12634	-21.3298	0.635973	-5.67002	0.63606	-5.78959	0.636269	-5.98175
0.67654	-21.1088	0.188659	-1.06441	0.0709098	-7.40251	0.885369	-21.7362		0.67517	-21.6886	0.674899	-21.7895	0.674741	-4.18934	0.872539	-21.6058		0.91765	-21.4174	0.520967	-3.24815	0.517542	-3.47746	0.523509	-3.49427		0.16845	-21.3301	0.674525	-5.93553	0.674611	-6.00393	0.674831	-6.1615
0.72969	-21.1079	0.235958	-1.52872	0.14182	-7.58233	0.942684	-21.7357		0.72811	-21.6888	0.727797	-21.7897	0.727616	-4.12974	0.936269	-21.6053		0.95883	-21.4181	0.559598	-2.79989	0.555979	-3.48262	0.562365	-3.76086		0.22124	-21.3301	0.713076	-6.17738	0.713162	-6.20819	0.713394	-6.37557
0.77667	-21.1086	0.283258	-1.53078	0.236109	-8.17237	1	-21.7355		0.77451	-21.6888	0.774081	-21.7896	0.773832	-4.12019	1	-21.6055		1	-21.4175	0.598191	-3.24743	0.594377	-3.47752	0.601182	-3.49353		0.27403	-21.3298	0.753358	-6.13677	0.753515	-6.15588	0.753849	-6.28968
0.82366	-21.1091	0.330558	-1.2758	0.330399	-7.88415	0	--		0.82091	-21.6885	0.820365	-21.7893	0.820048	-4.05501	0	--		0	--	0.636783	-3.96435	0.632776	-3.26327	0.64	-3.34322		0.32682	-21.3294	0.793641	-6.06315	0.793867	-6.12421	0.794304	-6.28239
0.87064	-21.1093	0.389612	-1.65517	0.409169	-8.26114	0	-14.5994		0.86731	-21.6884	0.86665	-21.7891	0.866263	-4.17861	0	-21.6048		0	-21.4163	0.675376	-3.29234	0.671174	-3.23921	0.678817	-3.35885		0.37306	-21.3296	0.833923	-5.92078	0.83422	-5.97042	0.834759	-6.12936
0.91376	-21.1093	0.448667	-1.39873	0.487938	-7.63859	0.0546755	-14.572		0.91154	-21.6883	0.9111	-21.7891	0.910842	-4.24823	0.0637306	-21.6052		0.04117	-21.4158	0.713969	-3.5031	0.709573	-3.04771	0.717634	-3.34729		0.4193	-21.3296	0.875442	-5.99958	0.875665	-6.02169	0.87607	-6.18231
0.95688	-21.1094	0.507721	-1.28041	0.566708	-7.05462	0.109351	-14.4901		0.95577	-21.688	0.95555	-21.7892	0.955421	-4.274	0.127461	-21.6051		0.08235	-21.4163	0.754675	-3.8384	0.748344	-3.18467	0.759901	-3.39412		0.46554	-21.3296	0.916961	-5.54557	0.91711	-5.68956	0.91738	-5.89504
1	-21.1097	0.566775	-0.727792	0.645398	-7.63781	0.164027	-14.3545		1	-21.6879	1	-21.7891	1	-4.27588	0.195238	-21.606		0.12352	-21.4165	0.795382	-3.55736	0.787115	-3.97769	0.802168	-3.25397		0.51178	-21.3299	0.958481	-5.52321	0.958555	-5.68738	0.95869	-5.90927
0	--	0.619216	-1.22025	0.724089	-8.26186	0.218702	-14.1671		0	--	0	--	0	--	0.263015	-21.6037		0.1647	-21.4155	0.836088	-3.71558	0.825886	-3.96588	0.844435	-3.33137		0.55802	-21.33	1	-5.52404	1	-5.6929	1	-5.91945
0	-21.1094	0.671656	-1.52728	0.791135	-7.85994	0.273378	-13.9317		0	-21.6879	0	-21.7891	0	-4.27503	0.330792	-21.6034		0.20544	-21.4157	0.877066	-3.827	0.869415	-3.98656	0.883327	-3.22242		0.60935	-21.3298	0	--	0	--	0	--
0.04312	-21.1094	0.724096	-1.61115	0.85818	-7.58233	0.328053	-13.6556		0.04423	-21.688	0.0444501	-21.7892	0.0445789	-4.27324	0.410782	-21.6038		0.24617	-21.4162	0.918044	-3.90305	0.912943	-3.32859	0.922218	-3.55815		0.66068	-21.3296	0	-5.1657	0	-5.30007	0	-5.54929
0.08624	-21.1093	0.768944	-1.38749	0.92909	-7.40251	0.385369	-13.6906		0.08846	-21.6883	0.0889002	-21.7891	0.0891577	-4.0625	0.490773	-21.6053		0.28691	-21.4168	0.959022	-3.17348	0.956472	-3.47998	0.961109	-3.36792		0.71201	-21.3296	0.0415193	-5.11985	0.0414449	-5.24297	0.0413101	-5.49817
0.12936	-21.1093	0.813793	-1.04933	1	-7.05462	0.442684	-13.6883		0.13269	-21.6884	0.13335	-21.7891	0.133737	-4.17858	0.570763	-21.6048		0.32765	-21.4163	1	-2.79989	1	-3.48262	1	-3.76086		0.75185	-21.3299	0.0830387	-5.49563	0.0828899	-5.48062	0.0826203	-5.60854
0.17972	-21.109	0.858641	-0.514902	0	--	0.5	-13.6565		0.18222	-21.6884	0.182718	-21.7893	0.183007	-4.00835	0.650673	-21.6053		0.37398	-21.4164	0	--	0	--	0	--		0.7917	-21.33	0.124558	-5.6609	0.124335	-5.76366	0.12393	-5.94031
0.23009	-21.1084	0.905761	-0.630115	0	-7.04431	0.554676	-13.8663		0.23176	-21.6884	0.232086	-21.7897	0.232277	-3.82756	0.730584	-21.6038		0.42032	-21.4165	0	-2.71905	0	-2.99282	0	-2.93329		0.83155	-21.3301	0.166077	-5.88604	0.16578	-5.96974	0.165241	-6.12618
0.28045	-21.1074	0.95288	-0.702923	0.0709098	-6.54254	0.609351	-14.0468		0.28129	-21.6885	0.281454	-21.7901	0.281547	-3.67584	0.801561	-21.6059		0.46666	-21.4165	0.040978	-3.16864	0.0435284	-3.3986	0.0388911	-3.36151		0.87366	-21.3298	0.20639	-5.92664	0.20619	-6.0121	0.205814	-6.1719
0.33082	-21.1075	1	-0.727792	0.14182	-5.93836	0.664027	-14.1877		0.33083	-21.6877	0.330822	-21.7899	0.330817	-3.97342	0.872539	-21.6051		0.51299	-21.4165	0.081956	-3.89874	0.0870568	-3.23656	0.0777823	-3.54657		0.91577	-21.3298	0.246703	-6.04272	0.2466	-6.13621	0.246388	-6.3119
0.3787	-21.1072	0	--	0.236109	-6.72279	0.718702	-14.2832		0.37852	-21.6884	0.378478	-21.7898	0.378452	-3.79025	0.936269	-21.6052		0.55933	-21.4163	0.122934	-3.31966	0.130585	-3.769	0.116673	-3.21638		0.95789	-21.3299	0.287015	-6.18945	0.28701	-6.29111	0.286962	-6.50366
0.42658	-21.108	0	-0.71665	0.330399	-7.87759	0.773378	-14.3298		0.42621	-21.6887	0.426134	-21.7895	0.426087	-3.96111	1	-21.6048		0.61076	-21.4165	0.163912	-3.34308	0.174114	-3.66237	0.155565	-2.97342		1	-21.33	0.327328	-6.26038	0.32742	-6.35307	0.327536	-6.55666
0.47447	-21.1088	0.0471196	-0.69155	0.409169	-7.47364	0.828053	-14.3264		0.47391	-21.6884	0.47379	-21.7894	0.473722	-4.06416	0	--		0.6622	-21.4165	0.204886	-3.04722	0.211924	-3.23351	0.198981	-3.06084		0	--	0.373636	-5.99673	0.373728	-6.05755	0.373857	-6.24792
0.52235	-21.1092	0.0942392	-0.618009	0.487938	-7.09496	0.885369	-14.477		0.5216	-21.6881	0.521446	-21.7892	0.521357	-4.12495	0	-21.6043		0.71363	-21.4165	0.245861	-3.32873	0.249735	-2.57583	0.242397	-3.15919		0	-21.3299	0.419944	-5.6691	0.420035	-5.71092	0.420179	-5.87546
0.57023	-21.1094	0.141359	-0.514891	0.566708	-7.04431	0.942684	-14.5686		0.56929	-21.6879	0.569102	-21.7891	0.568992	-4.27503	0.0637306	-21.6049		0.75419	-21.4169	0.286835	-3.34561	0.287546	-2.53434	0.285813	-3.05649		0.04211	-21.3298	0.466253	-5.36536	0.466343	-5.37007	0.4665	-5.49155
0.62338	-21.1092	0.188659	-1.06311	0.645398	-7.09466	1	-14.5994		0.62223	-21.6881	0.622	-21.7892	0.621866	-4.10756	0.127461	-21.605		0.79475	-21.4161	0.32781	-3.6335	0.325357	-2.56051	0.329229	-2.87931		0.08423	-21.3297	0.512561	-5.13169	0.51265	-5.26951	0.512822	-5.51598
0.67654	-21.1086	0.235958	-1.52766	0.724089	-7.4728	0	--		0.67517	-21.6885	0.674899	-21.7894	0.674741	-4.08571	0.195238	-21.606		0.8353	-21.4155	0.366441	-3.50587	0.363794	-2.67633	0.368085	-2.9542		0.12634	-21.3296	0.55887	-5.1657	0.558958	-5.30007	0.559143	-5.54929
0.72969	-21.1078	0.283258	-1.52968	0.791135	-6.54857	0	-13.571		0.72811	-21.6887	0.727797	-21.7896	0.727616	-3.86816	0.263015	-21.6036		0.87648	-21.4165	0.405072	-3.24138	0.402231	-2.84301	0.406941	-3.00347		0.16845	-21.3296	0.597421	-5.14004	0.597509	-5.27894	0.597706	-5.5262
0.77667	-21.1086	0.330558	-1.27534	0.85818	-5.93836	0.0546755	-13.6106		0.77451	-21.6887	0.774081	-21.7894	0.773832	-3.90932	0.330792	-21.6034		0.91765	-21.4163	0.443704	-3.14474	0.440668	-3.02028	0.445797	-3.03682		0.22124	-21.3292	0.635973	-5.27639	0.63606	-5.26074	0.636269	-5.45718
0.82366	-21.1091	0.389612	-1.24281	0.92909	-6.54254	0.109351	-13.6216		0.82091	-21.6884	0.820365	-21.7892	0.820048	-3.99716	0.410782	-21.6037		0.95883	-21.4158	0.482335	-3.63946	0.479105	-3.18816	0.484653	-3.33857		0.27403	-21.3289	0.674525	-5.50858	0.674611	-5.53576	0.674831	-5.68059
0.87064	-21.1093	0.448667	-1.3291	1	-7.04431	0.164027	-13.6091		0.86731	-21.6884	0.86665	-21.7891	0.866263	-4.17858	0.490773	-21.6048		1	-21.4163	0.520967	-3.24728	0.517542	-3.4298	0.523509	-3.42427		0.32682	-21.3294	0.713076	-5.77853	0.713162	-5.82761	0.713394	-6.00242
0.91376	-21.1093	0.507721	-0.599008	0	--	0.218702	-13.5835		0.91154	-21.6883	0.9111	-21.7891	0.910842	-4.0625	0.570763	-21.6043		0	--	0.559598	-2.71905	0.555979	-2.99282	0.562365	-2.93329		0.37306	-21.3291	0.753358	-5.81982	0.753515	-5.91002	0.753849	-6.10287
0.95688	-21.1094	0.566775	-0.71665	0	-7.03918	0.273378	-13.5588		0.95577	-21.688	0.95555	-21.7892	0.955421	-4.27324	0.650673	-21.6048		0	-21.4161	0.598191	-3.24656	0.594377	-3.42991	0.601182	-3.42456		0.4193	-21.3289	0.793641	-5.81918	0.793867	-5.8999	0.794304	-6.0657
1	-21.1094	0.619216	-0.545276	0.0709098	-6.53752	0.328053	-13.6553		1	-21.6879	1	-21.7891	1	-4.27503	0.730584	-21.6037		0.04117	-21.4156	0.636783	-3.64085	0.632776	-3.18898	0.64	-3.3396		0.46554	-21.3294	0.833923	-5.88604	0.83422	-5.96974	0.834759	-6.12618
0	--	0.671656	-1.15651	0.14182	-5.93835	0.385369	-13.5811		0	--	0	--	0	--	0.801561	-21.6057		0.08235	-21.415	0.675376	-3.14593	0.671174	-3.0221	0.678817	-3.0388		0.51178	-21.3298	0.875442	-5.6609	0.875665	-5.76366	0.87607	-5.94031
0	-21.1029	0.724096	-1.20491	0.236109	-6.7152	0.442684	-13.6088		0	-21.6877	0	-21.7887	0	-3.71547	0.872539	-21.605		0.12352	-21.4147	0.713969	-3.24031	0.709573	-2.84359	0.717634	-3.00354		0.55802	-21.3299	0.916961	-5.49563	0.91711	-5.48062	0.91738	-5.60854
0.04312	-21.1029	0.768944	-1.25751	0.330399	-7.87759	0.5	-13.6561		0.04423	-21.6878	0.0444501	-21.7888	0.0445789	-3.90504	0.936269	-21.6049		0.1647	-21.4155	0.754675	-3.47468	0.748344	-2.9682	0.759901	-3.30469		0.60935	-21.3297	0.958481	-5.11985	0.958555	-5.24297	0.95869	-5.49817
0.08624	-21.1029	0.813793	-0.945199	0.409169	-6.75819	0.554676	-13.5894		0.08846	-21.688	0.0889002	-21.789	0.0891577	-4.06216	1	-21.6043		0.20544	-21.4157	0.795382	-3.31647	0.787115	-3.40712	0.802168	-3.21888		0.66068	-21.3293	1	-5.1657	1	-5.30007	1	-5.54929
0.12936	-21.1029	0.858641	-0.514891	0.487938	-6.87196	0.609351	-13.8204		0.13269	-21.6882	0.13335	-21.789	0.133737	-3.81739	0	--		0.24617	-21.4162	0.836088	-3.34308	0.825886	-3.66237	0.844435	-2.97342		0.71201	-21.3288	0	--	0	--	0	--
0.17972	-21.1034	0.905761	-0.618009	0.566708	-7.03918	0.664027	-14.0158		0.18222	-21.6883	0.182718	-21.7892	0.183007	-3.79888	0	-21.6042		0.28691	-21.4168	0.877066	-3.31966	0.869415	-3.769	0.883327	-3.21638		0.75185	-21.329	0	-5.15876	0	-5.30001	0	-5.54918
0.23009	-21.1044	0.95288	-0.69155	0.645398	-6.87231	0.718702	-14.1678		0.23176	-21.6884	0.232086	-21.7892	0.232277	-3.74666	0.0637306	-21.6047		0.32765	-21.4163	0.918044	-3.89874	0.912943	-3.23656	0.922218	-3.54657		0.7917	-21.3294	0.0415193	-5.10022	0.0414449	-5.24125	0.0413101	-5.49497
0.28045	-21.1059	1	-0.71665	0.724089	-6.756	0.773378	-14.2719		0.28129	-21.6884	0.281454	-21.7889	0.281547	-3.67274	0.127461	-21.6045		0.37398	-21.4162	0.959022	-3.16864	0.956472	-3.3986	0.961109	-3.36151		0.83155	-21.3296	0.0830387	-4.90462	0.0828899	-5.04416	0.0826203	-5.29449
0.33082	-21.1062	0	--	0.791135	-6.20935	0.828053	-14.3259		0.33083	-21.6877	0.330822	-21.7899	0.330817	-3.60108	0.195238	-21.6045		0.42032	-21.4159	1	-2.71905	1	-2.99282	1	-2.93329		0.87366	-21.3296	0.124558	-4.83814	0.124335	-4.90372	0.12393	-5.1098
0.3787	-21.1063	0	-0.529658	0.85818	-5.93835	0.885369	-14.1199		0.37852	-21.6883	0.378478	-21.7895	0.378452	-3.75677	0.263015	-21.6035		0.46666	-21.4155	0	--	0	--	0	--		0.91577	-21.3297	0.166077	-4.75034	0.16578	-4.84569	0.165241	-5.08089
0.42658	-21.1051	0.0471196	-0.382469	0.92909	-6.53752	0.942684	-13.8643		0.42621	-21.6879	0.426134	-21.7894	0.426087	-3.89174	0.330792	-21.6023		0.51299	-21.4152	0	-2.71654	0	-2.98898	0	-2.92314		0.95789	-21.3298	0.20639	-4.73099	0.20619	-4.82994	0.205814	-5.06605
0.47447	-21.104	0.0942392	-0.382968	1	-7.03918	1	-13.571		0.47391	-21.6877	0.47379	-21.7892	0.473722	-3.96692	0.410782	-21.6035		0.55933	-21.4161	0.040978	-3.14185	0.0435284	-2.72125	0.0388911	-3.19443		1	-21.3299	0.246703	-4.67207	0.2466	-4.77942	0.246388	-5.01693
0.52235	-21.1032	0.141359	-0.501406	0	--	0	--		0.5216	-21.6877	0.521446	-21.7888	0.521357	-3.92004	0.490773	-21.6047		0.61076	-21.4151	0.081956	-3.54969	0.0870568	-3.10276	0.0777823	-2.88322		0	--	0.287015	-4.57294	0.28701	-4.68832	0.286962	-4.9252
0.57023	-21.1029	0.188659	-0.105687	0	-5.75772	0	-13.5696		0.56929	-21.6877	0.569102	-21.7887	0.568992	-3.71547	0.570763	-21.6042		0.6622	-21.4156	0.122934	-3.31724	0.130585	-3.40017	0.116673	-3.05718		0	-21.3284	0.327328	-4.45157	0.32742	-4.56645	0.327536	-4.79331
0.62338	-21.1033	0.235958	-0.33575	0.0709098	-5.69616	0.0546755	-13.4994		0.62223	-21.6877	0.622	-21.7889	0.621866	-3.93926	0.650673	-21.6047		0.71363	-21.416	0.163912	-3.34213	0.174114	-3.66202	0.155565	-2.96731		0.04211	-21.3288	0.373636	-4.69267	0.373728	-4.80621	0.373857	-5.03893
0.67654	-21.1043	0.283258	-0.818216	0.14182	-5.68945	0.109351	-13.4016		0.67517	-21.6877	0.674899	-21.7893	0.674741	-3.9329	0.730584	-21.6035		0.75419	-21.4154	0.204886	-3.04685	0.211924	-3.2324	0.198981	-3.0535		0.08423	-21.3293	0.419944	-4.89654	0.420035	-5.02048	0.420179	-5.25393
0.72969	-21.1055	0.330558	-1.27443	0.236109	-5.80325	0.164027	-13.2862		0.72811	-21.6879	0.727797	-21.7892	0.727616	-3.84851	0.801561	-21.6046		0.79475	-21.4153	0.245861	-3.32828	0.249735	-2.57482	0.242397	-3.1458		0.12634	-21.3295	0.466253	-5.04504	0.466343	-5.17634	0.4665	-5.4167
0.77667	-21.1042	0.389612	-0.868171	0.330399	-5.53696	0.218702	-13.1708		0.77451	-21.6881	0.774081	-21.7893	0.773832	-3.80205	0.872539	-21.6045		0.8353	-21.4155	0.286835	-3.34359	0.287546	-2.52979	0.285813	-3.04288		0.16845	-21.3295	0.512561	-5.10119	0.51265	-5.17247	0.512822	-5.43075
0.82366	-21.1033	0.448667	-0.563373	0.409169	-6.32714	0.273378	-13.3505		0.82091	-21.6883	0.820365	-21.7892	0.820048	-3.98931	0.936269	-21.6047		0.87648	-21.4147	0.32781	-3.63346	0.325357	-2.56032	0.329229	-2.87918		0.22124	-21.3291	0.55887	-5.15876	0.558958	-5.30001	0.559143	-5.54918
0.87064	-21.1029	0.507721	-0.483954	0.487938	-5.87049	0.328053	-13.5486		0.86731	-21.6882	0.86665	-21.789	0.866263	-3.81739	1	-21.6042		0.91765	-21.415	0.366441	-3.50418	0.363794	-2.55083	0.368085	-2.83824		0.27403	-21.3289	0.597421	-5.08404	0.597509	-5.21348	0.597706	-5.47124
0.91376	-21.1029	0.566775	-0.529658	0.566708	-5.75772	0.385369	-13.566		0.91154	-21.688	0.9111	-21.789	0.910842	-4.06216	0	--		0.95883	-21.4156	0.405072	-3.23882	0.402231	-2.43509	0.406941	-2.67899		0.32682	-21.3294	0.635973	-5.08093	0.63606	-5.21461	0.636269	-5.36686
0.95688	-21.1029	0.619216	-0.481601	0.645398	-5.87036	0.442684	-13.4713		0.95577	-21.6878	0.95555	-21.7888	0.955421	-3.90504	0	-21.6039		1	-21.4161	0.443704	-2.99975	0.440668	-2.93716	0.445797	-2.97759		0.37306	-21.329	0.674525	-4.97874	0.674611	-5.10645	0.674831	-5.34343
1	-21.1029	0.671656	-0.521679	0.724089	-6.32835	0.5	-13.3374		1	-21.6877	1	-21.7887	1	-3.71547	0.0637306	-21.6047		0	--	0.482335	-3.00497	0.479105	-3.12494	0.484653	-3.26269		0.4193	-21.3287	0.713076	-4.83472	0.713162	-4.9559	0.713394	-5.18701
0	--	0.724096	-0.750359	0.791135	-6.03453	0.554676	-13.4321		0	--	0	--	0	--	0.127461	-21.6044		0	-21.4144	0.520967	-2.85415	0.517542	-2.88826	0.523509	-2.8257		0.46554	-21.3288	0.753358	-4.81162	0.753515	-4.91772	0.753849	-5.15989
0	-21.1029	0.768944	-0.384095	0.85818	-5.68945	0.609351	-13.2136		0	-21.6876	0	-21.7887	0	-3.71525	0.195238	-21.6044		0.04117	-21.4153	0.559598	-2.71654	0.555979	-2.98898	0.562365	-2.92314		0.51178	-21.3286	0.793641	-4.78786	0.793867	-4.88228	0.794304	-5.10998
0.04312	-21.1029	0.813793	-0.133896	0.92909	-5.69616	0.664027	-13.0204		0.04423	-21.6877	0.0444501	-21.7888	0.0445789	-3.90476	0.263015	-21.6035		0.08235	-21.4149	0.598191	-2.85404	0.594377	-2.88824	0.601182	-2.82567		0.55802	-21.3284	0.833923	-4.75034	0.83422	-4.84569	0.834759	-5.08089
0.08624	-21.1029	0.858641	-0.501406	1	-5.75772	0.718702	-12.8646		0.08846	-21.688	0.0889002	-21.789	0.0891577	-4.00926	0.330792	-21.6023		0.12352	-21.4142	0.636783	-3.00459	0.632776	-3.12309	0.64	-3.26272		0.60935	-21.3286	0.875442	-4.83814	0.875665	-4.90372	0.87607	-5.1098
0.12936	-21.1029	0.905761	-0.382968	0	--	0.773378	-12.7476		0.13269	-21.6882	0.13335	-21.789	0.133737	-3.81736	0.410782	-21.6034		0.1647	-21.4135	0.675376	-2.9991	0.671174	-2.93727	0.678817	-2.9774		0.66068	-21.3288	0.916961	-4.90462	0.91711	-5.04416	0.91738	-5.29449
0.17972	-21.1034	0.95288	-0.382469	0	-5.57818	0.828053	-12.667		0.18222	-21.6882	0.182718	-21.7892	0.183007	-3.79885	0.490773	-21.6043		0.20544	-21.4141	0.713969	-3.23775	0.709573	-2.43432	0.717634	-2.67814		0.71201	-21.3287	0.958481	-5.10022	0.958555	-5.24125	0.95869	-5.49497
0.23009	-21.1044	1	-0.529658	0.0709098	-5.33144	0.885369	-12.9428		0.23176	-21.6884	0.232086	-21.7892	0.232277	-3.74662	0.570763	-21.6039		0.24617	-21.4148	0.754675	-2.83018	0.748344	-2.89346	0.759901	-2.73938		0.75185	-21.3289	1	-5.15876	1	-5.30001	1	-5.54918
0.28045	-21.1059	0	--	0.14182	-5.68944	0.942684	-13.2547		0.28129	-21.6884	0.281454	-21.7889	0.281547	-3.67269	0.650673	-21.6043		0.28691	-21.4156	0.795382	-3.12475	0.787115	-3.18998	0.802168	-2.81037		0.7917	-21.3293	0	--	0	--	0	--
0.33082	-21.1062	0	-0.523975	0.236109	-5.77518	1	-13.5696		0.33083	-21.6877	0.330822	-21.7899	0.330817	-3.60103	0.730584	-21.6034		0.32765	-21.4163	0.836088	-3.34213	0.825886	-3.66202	0.844435	-2.96731		0.83155	-21.3295	0	-4.92427	0	-4.95262	0	-5.2718
0.3787	-21.1061	0.0471196	-0.365088	0.330399	-5.53696	0	--		0.37852	-21.6881	0.378478	-21.7895	0.378452	-3.68574	0.801561	-21.6042		0.37398	-21.4161	0.877066	-3.31724	0.869415	-3.40017	0.883327	-3.05718		0.87366	-21.3295	0.0415193	-5.07252	0.0414449	-5.03303	0.0413101	-5.18151
0.42658	-21.1048	0.0942392	-0.366812	0.409169	-5.83358	0	-12.2882		0.42621	-21.6879	0.426134	-21.7892	0.426087	-3.81745	0.872539	-21.6044		0.42032	-21.4149	0.918044	-3.54969	0.912943	-3.10276	0.922218	-2.88322		0.91577	-21.3293	0.0830387	-4.90368	0.0828899	-5.04029	0.0826203	-5.28882
0.47447	-21.1038	0.141359	-0.501372	0.487938	-5.58456	0.0546755	-12.3425		0.47391	-21.6877	0.47379	-21.7891	0.473722	-3.90508	0.936269	-21.6047		0.46666	-21.4141	0.959022	-3.14185	0.956472	-2.72125	0.961109	-3.19443		0.95789	-21.3288	0.124558	-4.56416	0.124335	-4.69093	0.12393	-4.91856
0.52235	-21.1032	0.188659	-0.104282	0.566708	-5.57818	0.109351	-12.4999		0.5216	-21.6876	0.521446	-21.7888	0.521357	-3.83677	1	-21.6039		0.51299	-21.415	1	-2.71654	1	-2.98898	1	-2.92314		1	-21.3284	0.166077	-4.72837	0.16578	-4.84502	0.165241	-5.07821
0.57023	-21.1029	0.235958	-0.33395	0.645398	-5.58346	0.164027	-12.7416		0.56929	-21.6876	0.569102	-21.7887	0.568992	-3.71525	0	--		0.55933	-21.4144	0	--	0	--	0	--		0	--	0.20639	-4.71204	0.20619	-4.82927	0.205814	-5.06358
0.62338	-21.1032	0.283258	-0.816594	0.724089	-5.83395	0.218702	-13.0365		0.62223	-21.6876	0.622	-21.7888	0.621866	-3.84798	0	-21.6039		0.61076	-21.4151	0	-2.71548	0	-1.75773	0	-2.01411		0	-21.3278	0.246703	-4.66102	0.2466	-4.77873	0.246388	-5.01502
0.67654	-21.104	0.330558	-1.27414	0.791135	-5.51	0.273378	-13.0818		0.67517	-21.6877	0.674899	-21.7891	0.674741	-3.90946	0.0637306	-21.6044		0.6622	-21.4141	0.040978	-2.86165	0.0435284	-2.30079	0.0388911	-2.36119		0.04211	-21.3283	0.287015	-4.57138	0.28701	-4.68765	0.286962	-4.92398
0.72969	-21.1052	0.389612	-0.702749	0.85818	-5.68944	0.328053	-13.0478		0.72811	-21.6879	0.727797	-21.7892	0.727616	-3.77176	0.127461	-21.6044		0.71363	-21.4153	0.081956	-3.04111	0.0870568	-3.07504	0.0777823	-2.72797		0.08423	-21.3284	0.327328	-4.44155	0.32742	-4.5661	0.327536	-4.79146
0.77667	-21.1041	0.448667	-0.074141	0.92909	-5.33144	0.385369	-13.0901		0.77451	-21.6881	0.774081	-21.7892	0.773832	-3.7828	0.195238	-21.6038		0.75419	-21.4152	0.122934	-3.315	0.130585	-2.89525	0.116673	-3.00826		0.12634	-21.3285	0.373636	-4.67995	0.373728	-4.80021	0.373857	-5.03262
0.82366	-21.1033	0.507721	-0.172979	1	-5.57818	0.442684	-13.199		0.82091	-21.6882	0.820365	-21.7891	0.820048	-3.66752	0.263015	-21.6034		0.79475	-21.4144	0.163912	-2.6286	0.174114	-2.18453	0.155565	-2.74716		0.16845	-21.3285	0.419944	-4.85734	0.420035	-4.96018	0.420179	-5.19773
0.87064	-21.1029	0.566775	-0.523975	0	--	0.5	-13.3366		0.86731	-21.6882	0.86665	-21.789	0.866263	-3.81736	0.330792	-21.6022		0.8353	-21.4135	0.204886	-2.83848	0.211924	-2.32968	0.198981	-2.3325		0.22124	-21.3286	0.466253	-4.89354	0.466343	-4.95298	0.4665	-5.18133
0.91376	-21.1029	0.619216	-0.2291	0	-5.54544	0.554676	-13.0856		0.91154	-21.688	0.9111	-21.789	0.910842	-4.00926	0.410782	-21.6032		0.87648	-21.4142	0.245861	-2.8775	0.249735	-2.49464	0.242397	-2.15142		0.27403	-21.3284	0.512561	-5.02539	0.51265	-5.0444	0.512822	-5.2405
0.95688	-21.1029	0.671656	0	0.0709098	-5.24365	0.609351	-12.8665		0.95577	-21.6877	0.95555	-21.7888	0.955421	-3.90476	0.490773	-21.6038		0.91765	-21.4149	0.286835	-3.25462	0.287546	-2.4445	0.285813	-2.61025		0.32682	-21.3278	0.55887	-4.92427	0.558958	-4.95262	0.559143	-5.2718
1	-21.1029	0.724096	-0.47217	0.14182	-5.41064	0.664027	-12.7107		1	-21.6876	1	-21.7887	1	-3.71525	0.570763	-21.6039		0.95883	-21.4153	0.32781	-2.62528	0.325357	-2.25641	0.329229	-2.37334		0.37306	-21.3283	0.597421	-5.04082	0.597509	-4.99352	0.597706	-5.24878
0	--	0.768944	-0.114233	0.236109	-5.0524	0.718702	-12.6329		0	--	0	--	0	--	0.650673	-21.6038		1	-21.4144	0.366441	-3.3711	0.363794	-2.37323	0.368085	-2.60713		0.4193	-21.3285	0.635973	-4.86455	0.63606	-4.92709	0.636269	-5.20389
0	-21.1029	0.813793	-0.133233	0.330399	-5.52899	0.773378	-12.6243		0	-21.6862	0	-21.7887	0	-3.71515	0.730584	-21.6032		0	--	0.405072	-3.09938	0.402231	-2.38575	0.406941	-2.40616		0.46554	-21.3283	0.674525	-4.89848	0.674611	-4.98377	0.674831	-5.21372
0.04312	-21.1029	0.858641	-0.501372	0.409169	-5.0782	0.828053	-12.6664		0.04423	-21.6865	0.0444501	-21.7887	0.0445789	-3.60618	0.801561	-21.604		0	-21.4142	0.443704	-2.99755	0.440668	-2.61878	0.445797	-2.70205		0.51178	-21.3281	0.713076	-4.81059	0.713162	-4.92086	0.713394	-5.16018
0.08624	-21.1029	0.905761	-0.366812	0.487938	-5.22201	0.885369	-12.4568		0.08846	-21.6872	0.0889002	-21.7888	0.0891577	-3.5209	0.872539	-21.6044		0.04117	-21.4136	0.482335	-2.80088	0.479105	-2.92721	0.484653	-2.89654		0.55802	-21.3278	0.753358	-4.78864	0.753515	-4.9084	0.753849	-5.13871
0.12936	-21.1029	0.95288	-0.365088	0.566708	-5.54544	0.942684	-12.33		0.13269	-21.688	0.13335	-21.789	0.133737	-3.50262	0.936269	-21.6044		0.08235	-21.414	0.520967	-2.65557	0.517542	-2.24253	0.523509	-2.51493		0.60935	-21.3281	0.793641	-4.64689	0.793867	-4.76421	0.794304	-5.0033
0.17972	-21.103	1	-0.523975	0.645398	-5.22289	1	-12.2882		0.18222	-21.6881	0.182718	-21.789	0.183007	-3.49146	1	-21.6039		0.12352	-21.4142	0.559598	-2.71548	0.555979	-1.75773	0.562365	-2.01411		0.66068	-21.3284	0.833923	-4.72837	0.83422	-4.84502	0.834759	-5.07821
0.23009	-21.1038	0	--	0.724089	-5.07734	0	--		0.23176	-21.6883	0.232086	-21.789	0.232277	-3.49748	0	--		0.1647	-21.4135	0.598191	-2.65549	0.594377	-2.24173	0.601182	-2.51418		0.71201	-21.3286	0.875442	-4.56416	0.875665	-4.69093	0.87607	-4.91856
0.28045	-21.1049	0	0.336846	0.791135	-5.16936	0	-11.7341		0.28129	-21.6884	0.281454	-21.7889	0.281547	-3.60846	0	-21.6038		0.20544	-21.4141	0.636783	-2.80052	0.632776	-2.92713	0.64	-2.89636		0.75185	-21.3287	0.916961	-4.90368	0.91711	-5.04029	0.91738	-5.28882
0.33082	-21.1062	0.0471196	0.254755	0.85818	-5.41064	0.0546755	-11.7225		0.33083	-21.6877	0.330822	-21.7898	0.330817	-3.60101	0.0637306	-21.6043		0.24617	-21.4148	0.675376	-2.9969	0.671174	-2.62087	0.678817	-2.70424		0.7917	-21.3286	0.958481	-5.07252	0.958555	-5.03303	0.95869	-5.18151
0.3787	-21.1053	0.0942392	0.475614	0.92909	-5.24365	0.109351	-11.6898		0.37852	-21.688	0.378478	-21.7888	0.378452	-3.61249	0.127461	-21.6043		0.28691	-21.4156	0.713969	-3.0983	0.709573	-2.38783	0.717634	-2.40675		0.83155	-21.3285	1	-4.92427	1	-4.95262	1	-5.2718
0.42658	-21.1043	0.141359	0.875752	1	-5.54544	0.164027	-11.6424		0.42621	-21.6876	0.426134	-21.789	0.426087	-3.63505	0.195238	-21.6037		0.32765	-21.4163	0.754675	-2.7	0.748344	-2.63641	0.759901	-2.40576		0.87366	-21.3285	0	--	0	--	0	--
0.47447	-21.1036	0.188659	0.581779	0	--	0.218702	-11.5914		0.47391	-21.6869	0.47379	-21.7889	0.473722	-3.67725	0.263015	-21.6034		0.37398	-21.415	0.795382	-2.71423	0.787115	-2.63277	0.802168	-2.68096		0.91577	-21.3284	0	-4.7975	0	-4.95219	0	-5.27092
0.52235	-21.1031	0.235958	0.854037	0	-5.02059	0.273378	-11.5513		0.5216	-21.6864	0.521446	-21.7887	0.521357	-3.71024	0.330792	-21.6022		0.42032	-21.4139	0.836088	-2.6286	0.825886	-2.18453	0.844435	-2.74716		0.95789	-21.3283	0.0415193	-4.76163	0.0414449	-4.87416	0.0413101	-5.17884
0.57023	-21.1029	0.283258	0.882505	0.0709098	-5.2161	0.328053	-11.536		0.56929	-21.6862	0.569102	-21.7887	0.568992	-3.71515	0.410782	-21.603		0.46666	-21.414	0.877066	-3.315	0.869415	-2.89525	0.883327	-3.00826		1	-21.3278	0.0830387	-4.82179	0.0828899	-4.84498	0.0826203	-5.01298
0.62338	-21.1031	0.330558	0.98033	0.14182	-5.41063	0.385369	-11.5243		0.62223	-21.6864	0.622	-21.7888	0.621866	-3.70764	0.490773	-21.6037		0.51299	-21.4136	0.918044	-3.04111	0.912943	-3.07504	0.922218	-2.72797		0	--	0.124558	-4.56086	0.124335	-4.68799	0.12393	-4.91391
0.67654	-21.1037	0.389612	0.289604	0.236109	-5.04574	0.442684	-11.492		0.67517	-21.6871	0.674899	-21.7889	0.674741	-3.66815	0.570763	-21.6038		0.55933	-21.4142	0.959022	-2.86165	0.956472	-2.30079	0.961109	-2.36119		0	-21.3277	0.166077	-4.13113	0.16578	-4.23543	0.165241	-4.43623
0.72969	-21.1046	0.448667	0.135823	0.330399	-5.52899	0.5	-11.4467		0.72811	-21.6878	0.727797	-21.789	0.727616	-3.62186	0.650673	-21.6037		0.61076	-21.4136	1	-2.71548	1	-1.75773	1	-2.01411		0.04211	-21.328	0.20639	-4.36239	0.20619	-4.47869	0.205814	-4.70305
0.77667	-21.1036	0.507721	0.131516	0.409169	-4.5286	0.554676	-11.466		0.77451	-21.6878	0.774081	-21.7891	0.773832	-3.61815	0.730584	-21.603		0.6622	-21.4139	0	--	0	--	0	--		0.08423	-21.3283	0.246703	-4.51666	0.2466	-4.63736	0.246388	-4.87315
0.82366	-21.103	0.566775	0.336846	0.487938	-4.93151	0.609351	-11.5049		0.82091	-21.6879	0.820365	-21.789	0.820048	-3.60897	0.801561	-21.6035		0.71363	-21.4142	0	-2.71485	0	-1.75697	0	-1.93408		0.12634	-21.3283	0.287015	-4.54214	0.28701	-4.65762	0.286962	-4.89065
0.87064	-21.1029	0.619216	0.0799185	0.566708	-5.02059	0.664027	-11.5505		0.86731	-21.688	0.86665	-21.789	0.866263	-3.50262	0.872539	-21.6043		0.75419	-21.414	0.040978	-2.39525	0.0435284	-2.13337	0.0388911	-1.66899		0.16845	-21.3285	0.327328	-4.43871	0.32742	-4.54371	0.327536	-4.78499
0.91376	-21.1029	0.671656	0.0985583	0.645398	-4.93167	0.718702	-11.5903		0.91154	-21.6872	0.9111	-21.7888	0.910842	-3.5209	0.936269	-21.6043		0.79475	-21.4137	0.081956	-2.41405	0.0870568	-3.03115	0.0777823	-1.69211		0.22124	-21.3286	0.373636	-4.45928	0.373728	-4.60581	0.373857	-4.88451
0.95688	-21.1029	0.724096	0.1922	0.724089	-4.52644	0.773378	-11.6154		0.95577	-21.6865	0.95555	-21.7887	0.955421	-3.60618	1	-21.6038		0.8353	-21.4135	0.122934	-2.89519	0.130585	-2.51212	0.116673	-2.3251		0.27403	-21.3284	0.419944	-4.62428	0.420035	-4.77742	0.420179	-5.07146
1	-21.1029	0.768944	0.408199	0.791135	-5.02127	0.828053	-11.622		1	-21.6862	1	-21.7887	1	-3.71515	0	--		0.87648	-21.4142	0.163912	-2.62832	0.174114	-2.18428	0.155565	-2.73933		0.32682	-21.3277	0.466253	-4.71314	0.466343	-4.87121	0.4665	-5.16641
0	--	0.813793	0.541344	0.85818	-5.41063	0.885369	-11.6786		0	--	0	--	0	--	0	-21.6037		0.91765	-21.414	0.204886	-2.8379	0.211924	-2.32903	0.198981	-2.33029		0.37306	-21.328	0.512561	-4.77909	0.51265	-4.92102	0.512822	-5.12778
0	-21.1028	0.858641	0.875752	0.92909	-5.2161	0.942684	-11.7195		0	-21.6862	0	-21.7887	0	-3.71488	0.0637306	-21.6038		0.95883	-21.4136	0.245861	-2.87597	0.249735	-2.49224	0.242397	-2.13984		0.4193	-21.3284	0.55887	-4.7975	0.558958	-4.95219	0.559143	-5.27092
0.04312	-21.1028	0.905761	0.475614	1	-5.02059	1	-11.7341		0.04423	-21.6865	0.0444501	-21.7887	0.0445789	-3.60545	0.127461	-21.6041		1	-21.4142	0.286835	-3.25365	0.287546	-2.4369	0.285813	-2.59055		0.46554	-21.3282	0.597421	-4.76962	0.597509	-4.929	0.597706	-5.11473
0.08624	-21.1028	0.95288	0.254755	0	--	0	--		0.08846	-21.6872	0.0889002	-21.7888	0.0891577	-3.40446	0.195238	-21.6032		0	--	0.32781	-2.62519	0.325357	-2.25621	0.329229	-2.37282		0.51178	-21.328	0.635973	-4.78367	0.63606	-4.9037	0.636269	-5.1782
0.12936	-21.1029	1	0.336846	0	-4.95372	0	-11.7325		0.13269	-21.688	0.13335	-21.789	0.133737	-3.50258	0.263015	-21.6029		0	-21.4134	0.366441	-2.53602	0.363794	-2.30102	0.368085	-2.44317		0.55802	-21.3277	0.674525	-4.67806	0.674611	-4.83382	0.674831	-5.13612
0.17972	-21.103	0	--	0.0709098	-5.20827	0.0546755	-11.721		0.18222	-21.6881	0.182718	-21.789	0.183007	-3.49141	0.330792	-21.6		0.04117	-21.4135	0.405072	-2.34492	0.402231	-2.31499	0.406941	-2.3273		0.60935	-21.3281	0.713076	-4.57803	0.713162	-4.72922	0.713394	-5.01797
0.23009	-21.1038	0	0.366924	0.14182	-4.41995	0.109351	-11.6883		0.23176	-21.6883	0.232086	-21.789	0.232277	-3.49743	0.410782	-21.6029		0.08235	-21.4129	0.443704	-2.88064	0.440668	-2.18906	0.445797	-2.43708		0.66068	-21.3281	0.753358	-4.51329	0.753515	-4.65312	0.753849	-4.92149
0.28045	-21.1049	0.0471196	0.270259	0.236109	-4.51585	0.164027	-11.6411		0.28129	-21.6884	0.281454	-21.7889	0.281547	-3.60839	0.490773	-21.6033		0.12352	-21.4129	0.482335	-2.79935	0.479105	-1.89545	0.484653	-2.17561		0.71201	-21.3283	0.793641	-4.53219	0.793867	-4.65573	0.794304	-4.88648
0.33082	-21.1062	0.0942392	0.529825	0.330399	-3.23783	0.218702	-11.5904		0.33083	-21.6876	0.330822	-21.7898	0.330817	-3.601	0.570763	-21.6037		0.1647	-21.4135	0.520967	-2.65453	0.517542	-1.87694	0.523509	-1.95791		0.75185	-21.3285	0.833923	-4.13113	0.83422	-4.23543	0.834759	-4.43623
0.3787	-21.1051	0.141359	0.87592	0.409169	-4.22419	0.273378	-11.5506		0.37852	-21.688	0.378478	-21.7887	0.378452	-3.59865	0.650673	-21.6033		0.20544	-21.413	0.559598	-2.71485	0.555979	-1.75697	0.562365	-1.93408		0.7917	-21.3285	0.875442	-4.56086	0.875665	-4.68799	0.87607	-4.91391
0.42658	-21.1041	0.188659	0.583677	0.487938	-4.88801	0.328053	-11.5354		0.42621	-21.6875	0.426134	-21.7889	0.426087	-3.54009	0.730584	-21.6029		0.24617	-21.4126	0.598191	-2.65444	0.594377	-1.87701	0.601182	-1.95775		0.83155	-21.3285	0.916961	-4.82179	0.91711	-4.84498	0.91738	-5.01298
0.47447	-21.1033	0.235958	0.855684	0.566708	-4.95372	0.385369	-11.5238		0.47391	-21.6869	0.47379	-21.7888	0.473722	-3.57264	0.801561	-21.6032		0.28691	-21.4123	0.636783	-2.799	0.632776	-1.89487	0.64	-2.1751		0.87366	-21.3283	0.958481	-4.76163	0.958555	-4.87416	0.95869	-5.17884
0.52235	-21.1029	0.283258	0.884704	0.645398	-4.88884	0.442684	-11.4914		0.5216	-21.6864	0.521446	-21.7887	0.521357	-3.67422	0.872539	-21.6041		0.32765	-21.4122	0.675376	-2.88308	0.671174	-2.18821	0.678817	-2.4363		0.91577	-21.3283	1	-4.7975	1	-4.95219	1	-5.27092
0.57023	-21.1028	0.330558	0.981	0.724089	-4.22634	0.5	-11.4466		0.56929	-21.6862	0.569102	-21.7887	0.568992	-3.71488	0.936269	-21.6038		0.37398	-21.4125	0.713969	-2.34842	0.709573	-2.31446	0.717634	-2.32643		0.95789	-21.328	0	--	0	--	0	--
0.62338	-21.1029	0.389612	0.47909	0.791135	-4.75642	0.554676	-11.4652		0.62223	-21.6864	0.622	-21.7887	0.621866	-3.66624	1	-21.6037		0.42032	-21.4132	0.754675	-2.68931	0.748344	-1.91686	0.759901	-2.27498		1	-21.3277	0	-4.78625	0	-4.84298	0	-4.90541
0.67654	-21.1034	0.448667	0.353805	0.85818	-4.41995	0.609351	-11.5038		0.67517	-21.687	0.674899	-21.7888	0.674741	-3.54108	0	--		0.46666	-21.4129	0.795382	-2.67579	0.787115	-1.95612	0.802168	-2.55112		0	--	0.0415193	-4.71797	0.0414449	-4.87215	0.0413101	-5.12038
0.72969	-21.1044	0.507721	0.137155	0.92909	-5.20827	0.664027	-11.5492		0.72811	-21.6877	0.727797	-21.789	0.727616	-3.55862	0	-21.6036		0.51299	-21.4135	0.836088	-2.62832	0.825886	-2.18428	0.844435	-2.73933		0	-21.3277	0.0830387	-4.53079	0.0828899	-4.66952	0.0826203	-4.95158
0.77667	-21.1035	0.566775	0.366924	1	-4.95372	0.718702	-11.5891		0.77451	-21.6877	0.774081	-21.7889	0.773832	-3.52375	0.0637306	-21.6035		0.55933	-21.4134	0.877066	-2.89519	0.869415	-2.51212	0.883327	-2.3251		0.04211	-21.3275	0.124558	-4.547	0.124335	-4.66959	0.12393	-4.91234
0.82366	-21.103	0.619216	0.155573	0	--	0.773378	-11.6142		0.82091	-21.6878	0.820365	-21.7889	0.820048	-3.50806	0.127461	-21.604		0.61076	-21.4135	0.918044	-2.41405	0.912943	-3.03115	0.922218	-1.69211		0.08423	-21.3278	0.166077	-4.12541	0.16578	-4.23466	0.165241	-4.436
0.87064	-21.1029	0.671656	0.484805	0	-4.82004	0.828053	-11.621		0.86731	-21.688	0.86665	-21.789	0.866263	-3.50258	0.195238	-21.6031		0.6622	-21.4131	0.959022	-2.39525	0.956472	-2.13337	0.961109	-1.66899		0.12634	-21.3281	0.20639	-4.35602	0.20619	-4.47864	0.205814	-4.70266
0.91376	-21.1028	0.724096	0.339738	0.0709098	-4.60737	0.885369	-11.6772		0.91154	-21.6872	0.9111	-21.7888	0.910842	-3.40446	0.263015	-21.6029		0.71363	-21.4129	1	-2.71485	1	-1.75697	1	-1.93408		0.16845	-21.3274	0.246703	-4.50994	0.2466	-4.63724	0.246388	-4.873
0.95688	-21.1028	0.768944	0.737172	0.14182	-4.41993	0.942684	-11.718		0.95577	-21.6865	0.95555	-21.7887	0.955421	-3.60545	0.330792	-21.6		0.75419	-21.4131	0	--	0	--	0	--		0.22124	-21.3274	0.287015	-4.53348	0.28701	-4.65732	0.286962	-4.89058
1	-21.1028	0.813793	0.637311	0.236109	-4.48541	1	-11.7325		1	-21.6862	1	-21.7887	1	-3.71488	0.410782	-21.6029		0.79475	-21.4133	0	-2.42415	0	-1.75384	0	-1.73614		0.27403	-21.3274	0.327328	-4.43812	0.32742	-4.54322	0.327536	-4.78432
0	--	0.858641	0.87592	0.330399	-3.23783	0	--		0	--	0	--	0	--	0.490773	-21.6031		0.8353	-21.4135	0.040978	-2.32554	0.0435284	-2.12122	0.0388911	-1.61146		0.32682	-21.3277	0.373636	-4.42674	0.373728	-4.54576	0.373857	-4.77947
0	-11.423	0.905761	0.529825	0.409169	-3.94812	0	-11.4937		0	-21.6841	0	-21.7877	0	-3.69751	0.570763	-21.6036		0.87648	-21.4129	0.081956	-2.3165	0.0870568	-2.04095	0.0777823	-1.57582		0.37306	-21.3278	0.419944	-4.34859	0.420035	-4.46797	0.420179	-4.69756
0.04312	-11.408	0.95288	0.270259	0.487938	-4.3739	0.0546755	-11.4851		0.04423	-21.6841	0.0444501	-21.7876	0.0445789	-3.5043	0.650673	-21.6031		0.91765	-21.4129	0.122934	-2.1985	0.130585	-1.93775	0.116673	-2.15677		0.4193	-21.3279	0.466253	-4.6208	0.466343	-4.7594	0.4665	-5.00262
0.08624	-11.3636	1	0.366924	0.566708	-4.82004	0.109351	-11.4609		0.08846	-21.6839	0.0889002	-21.7872	0.0891577	-3.37639	0.730584	-21.6029		0.95883	-21.4135	0.163912	-2.62406	0.174114	-1.77056	0.155565	-2.72997		0.46554	-21.3279	0.512561	-4.75625	0.51265	-4.78558	0.512822	-5.05497
0.12936	-11.2916	0	--	0.645398	-4.37478	0.164027	-11.4262		0.13269	-21.6837	0.13335	-21.7866	0.133737	-3.49075	0.801561	-21.6031		1	-21.4134	0.204886	-2.35161	0.211924	-1.88487	0.198981	-2.2439		0.51178	-21.3276	0.55887	-4.78625	0.558958	-4.84298	0.559143	-4.90541
0.17972	-11.2683	0	0.462397	0.724089	-3.95012	0.218702	-11.3894		0.18222	-21.684	0.182718	-21.7869	0.183007	-3.47947	0.872539	-21.604		0	--	0.245861	-2.04774	0.249735	-1.89307	0.242397	-1.64701		0.55802	-21.3277	0.597421	-4.7556	0.597509	-4.81939	0.597706	-5.07265
0.23009	-11.1994	0.0471196	0.651492	0.791135	-4.50003	0.273378	-11.361		0.23176	-21.685	0.232086	-21.7878	0.232277	-3.44648	0.936269	-21.6035		0	-21.4122	0.286835	-1.84047	0.287546	-1.63301	0.285813	-1.49239		0.60935	-21.3276	0.635973	-4.72955	0.63606	-4.88929	0.636269	-5.10099
0.28045	-11.0885	0.0942392	0.543725	0.85818	-4.41993	0.328053	-11.3502		0.28129	-21.6863	0.281454	-21.7887	0.281547	-3.5393	1	-21.6036		0.04117	-21.4123	0.32781	-2.62504	0.325357	-2.2543	0.329229	-2.3696		0.66068	-21.328	0.674525	-4.34352	0.674611	-4.47179	0.674831	-4.69943
0.33082	-10.9421	0.141359	0.879705	0.92909	-4.60737	0.385369	-11.3636		0.33083	-21.6872	0.330822	-21.7874	0.330817	-3.57425	0	--		0.08235	-21.4125	0.366441	-2.53444	0.363794	-1.91489	0.368085	-2.09983		0.71201	-21.3278	0.713076	-4.38183	0.713162	-4.50146	0.713394	-4.73271
0.3787	-11.1051	0.188659	0.801489	1	-4.82004	0.442684	-11.3993		0.37852	-21.6867	0.378478	-21.7886	0.378452	-3.58434	0	-21.6035		0.12352	-21.4129	0.405072	-2.22877	0.402231	-1.84535	0.406941	-2.15258		0.75185	-21.3278	0.753358	-4.50538	0.753515	-4.6261	0.753849	-4.86633
0.42658	-11.2401	0.235958	0.860895	0	--	0.5	-11.4462		0.42621	-21.6858	0.426134	-21.7888	0.426087	-3.45488	0.0637306	-21.6018		0.1647	-21.4135	0.443704	-2.84149	0.440668	-2.08333	0.445797	-2.02595		0.7917	-21.3277	0.793641	-4.26275	0.793867	-4.38577	0.794304	-4.63205
0.47447	-11.3405	0.283258	1.12309	0	-3.85473	0.554676	-11.4533		0.47391	-21.6849	0.47379	-21.7884	0.473722	-3.51615	0.127461	-21.6002		0.20544	-21.413	0.482335	-2.62408	0.479105	-1.76716	0.484653	-1.81778		0.83155	-21.3274	0.833923	-4.12541	0.83422	-4.23466	0.834759	-4.436
0.52235	-11.4022	0.330558	0.98305	0.0709098	-4.35785	0.609351	-11.4839		0.5216	-21.6843	0.521446	-21.7879	0.521357	-3.49806	0.195238	-21.6014		0.24617	-21.4126	0.520967	-2.47665	0.517542	-1.63702	0.523509	-1.86942		0.87366	-21.3281	0.875442	-4.547	0.875665	-4.66959	0.87607	-4.91234
0.57023	-11.423	0.389612	1.22384	0.14182	-4.37993	0.664027	-11.5277		0.56929	-21.6841	0.569102	-21.7877	0.568992	-3.69751	0.263015	-21.6028		0.28691	-21.4123	0.559598	-2.42415	0.555979	-1.75384	0.562365	-1.73614		0.91577	-21.3278	0.916961	-4.53079	0.91711	-4.66952	0.91738	-4.95158
0.62338	-11.3973	0.448667	0.814948	0.236109	-3.68255	0.718702	-11.5715		0.62223	-21.6844	0.622	-21.7879	0.621866	-3.49344	0.330792	-21.6		0.32765	-21.4122	0.598191	-2.47655	0.594377	-1.63682	0.601182	-1.86948		0.95789	-21.3275	0.958481	-4.71797	0.958555	-4.87215	0.95869	-5.12038
0.67654	-11.3216	0.507721	0.719525	0.330399	-3.23638	0.773378	-11.6046		0.67517	-21.6851	0.674899	-21.7885	0.674741	-3.5219	0.410782	-21.6023		0.37398	-21.4122	0.636783	-2.6237	0.632776	-1.76715	0.64	-1.81744		1	-21.3277	1	-4.78625	1	-4.84298	1	-4.90541
0.72969	-11.1991	0.566775	0.462397	0.409169	-3.78778	0.828053	-11.6187		0.72811	-21.6861	0.727797	-21.7888	0.727616	-3.54653	0.490773	-21.603		0.42032	-21.4124	0.675376	-2.84076	0.671174	-2.08233	0.678817	-2.02525		0	--	0	--	0	--	0	--
0.77667	-11.2687	0.619216	0.702383	0.487938	-3.79315	0.885369	-11.5589		0.77451	-21.6849	0.774081	-21.788	0.773832	-3.44191	0.570763	-21.6035		0.46666	-21.4129	0.713969	-2.22703	0.709573	-1.84866	0.717634	-2.15418		0	-21.3273	0	-4.72206	0	-4.72015	0	-4.85743
0.82366	-11.3	0.671656	0.754338	0.566708	-3.85473	0.942684	-11.5116		0.82091	-21.684	0.820365	-21.7871	0.820048	-3.46808	0.650673	-21.603		0.51299	-21.4123	0.754675	-2.59997	0.748344	-1.90395	0.759901	-2.02067		0.04211	-21.3274	0.0415193	-4.7141	0.0414449	-4.75719	0.0413101	-4.90167
0.87064	-11.2916	0.724096	1.11101	0.645398	-3.79266	1	-11.4937		0.86731	-21.6837	0.86665	-21.7866	0.866263	-3.49075	0.730584	-21.6023		0.55933	-21.4122	0.795382	-2.49603	0.787115	-1.94073	0.802168	-2.14451		0.08423	-21.3274	0.0830387	-4.52635	0.0828899	-4.66747	0.0826203	-4.94849
0.91376	-11.3636	0.768944	0.749361	0.724089	-3.78876	0	--		0.91154	-21.6839	0.9111	-21.7872	0.910842	-3.37639	0.801561	-21.6017		0.61076	-21.4124	0.836088	-2.62406	0.825886	-1.77056	0.844435	-2.72997		0.12634	-21.3274	0.124558	-4.26801	0.124335	-4.38921	0.12393	-4.64283
0.95688	-11.408	0.813793	0.666848	0.791135	-4.20247	0	-11.4935		0.95577	-21.6841	0.95555	-21.7876	0.955421	-3.5043	0.872539	-21.6002		0.6622	-21.4128	0.877066	-2.1985	0.869415	-1.93775	0.883327	-2.15677		0.16845	-21.3274	0.166077	-4.11934	0.16578	-4.23054	0.165241	-4.43542
1	-11.423	0.858641	0.879705	0.85818	-4.37993	0.0546755	-11.4848		1	-21.6841	1	-21.7877	1	-3.69751	0.936269	-21.6018		0.71363	-21.4123	0.918044	-2.3165	0.912943	-2.04095	0.922218	-1.57582		0.22124	-21.3274	0.20639	-4.13033	0.20619	-4.24252	0.205814	-4.47988
0	--	0.905761	0.543725	0.92909	-4.35785	0.109351	-11.4605		0	--	0	--	0	--	1	-21.6035		0.75419	-21.4123	0.959022	-2.32554	0.956472	-2.12122	0.961109	-1.61146		0.27403	-21.3274	0.246703	-4.26178	0.2466	-4.38321	0.246388	-4.63048
0	-10.9483	0.95288	0.651492	1	-3.85473	0.164027	-11.4257		0	-21.6839	0	-21.7874	0	-3.69666	0	--		0.79475	-21.4128	1	-2.42415	1	-1.75384	1	-1.73614		0.32682	-21.3277	0.287015	-4.31392	0.28701	-4.4439	0.286962	-4.70322
0.04312	-11.0782	1	0.462397	0	--	0.218702	-11.3888		0.04423	-21.6838	0.0444501	-21.7873	0.0445789	-3.50407	0	-21.6034		0.8353	-21.4135	0	--	0	--	0	--		0.37306	-21.3273	0.327328	-4.43519	0.32742	-4.543	0.327536	-4.76632
0.08624	-11.1949	0	--	0	-3.81763	0.273378	-11.3603		0.08846	-21.6837	0.0889002	-21.7869	0.0891577	-3.37597	0.0637306	-21.6015		0.87648	-21.4129	0	-2.42176	0	-1.55079	0	-1.73115		0.4193	-21.3277	0.373636	-4.38622	0.373728	-4.5026	0.373857	-4.7371
0.12936	-11.2916	0	0.495494	0.0709098	-3.96188	0.328053	-11.3495		0.13269	-21.6837	0.13335	-21.7866	0.133737	-3.4907	0.127461	-21.6001		0.91765	-21.4125	0.040978	-2.10257	0.0435284	-1.20193	0.0388911	-1.42848		0.46554	-21.3276	0.419944	-4.28658	0.420035	-4.40759	0.420179	-4.64432
0.17972	-11.2683	0.0471196	0.65787	0.14182	-4.37991	0.385369	-11.3629		0.18222	-21.684	0.182718	-21.7869	0.183007	-3.47942	0.195238	-21.6014		0.95883	-21.4123	0.081956	-2.06078	0.0870568	-1.32857	0.0777823	-1.56598		0.51178	-21.3274	0.466253	-4.25882	0.466343	-4.3809	0.4665	-4.63334
0.23009	-11.1994	0.0942392	0.773128	0.236109	-3.65747	0.442684	-11.3986		0.23176	-21.685	0.232086	-21.7878	0.232277	-3.44644	0.263015	-21.6028		1	-21.4122	0.122934	-1.99193	0.130585	-1.53831	0.116673	-2.14838		0.55802	-21.3273	0.512561	-4.62367	0.51265	-4.76677	0.512822	-4.94664
0.28045	-11.0885	0.141359	0.879826	0.330399	-3.23637	0.5	-11.4452		0.28129	-21.6863	0.281454	-21.7887	0.281547	-3.53926	0.330792	-21.6		0	--	0.163912	-2.62368	0.174114	-1.77027	0.155565	-2.7256		0.60935	-21.3274	0.55887	-4.72206	0.558958	-4.72015	0.559143	-4.85743
0.33082	-10.9421	0.188659	0.802626	0.409169	-3.56287	0.554676	-11.4529		0.33083	-21.6872	0.330822	-21.7874	0.330817	-3.57416	0.410782	-21.6021		0	-21.4121	0.204886	-2.35058	0.211924	-1.87876	0.198981	-2.23572		0.66068	-21.3276	0.597421	-4.67187	0.597509	-4.76166	0.597706	-4.91435
0.3787	-11.0104	0.235958	0.861318	0.487938	-3.7869	0.609351	-11.4835		0.37852	-21.6866	0.378478	-21.7884	0.378452	-3.55764	0.490773	-21.6028		0.04117	-21.4122	0.245861	-2.04705	0.249735	-1.8868	0.242397	-1.63601		0.71201	-21.3276	0.635973	-4.38615	0.63606	-4.5144	0.636269	-4.77738
0.42658	-11.0457	0.283258	1.12548	0.566708	-3.81763	0.664027	-11.527		0.42621	-21.6856	0.426134	-21.7887	0.426087	-3.40799	0.570763	-21.6034		0.08235	-21.4125	0.286835	-1.83989	0.287546	-1.63006	0.285813	-1.48596		0.75185	-21.3275	0.674525	-4.28404	0.674611	-4.40251	0.674831	-4.62905
0.47447	-11.0467	0.330558	0.983604	0.645398	-3.78705	0.718702	-11.5706		0.47391	-21.6847	0.47379	-21.7881	0.473722	-3.42978	0.650673	-21.6028		0.12352	-21.4124	0.32781	-2.62502	0.325357	-2.25424	0.329229	-2.36937		0.7917	-21.3274	0.713076	-4.3249	0.713162	-4.44403	0.713394	-4.68003
0.52235	-11.0134	0.389612	1.26326	0.724089	-3.56345	0.773378	-11.6034		0.5216	-21.6841	0.521446	-21.7875	0.521357	-3.49104	0.730584	-21.6021		0.1647	-21.4121	0.366441	-1.62656	0.363794	-1.38788	0.368085	-1.46017		0.83155	-21.3274	0.753358	-4.14135	0.753515	-4.25332	0.753849	-4.47609
0.57023	-10.9483	0.448667	0.907586	0.791135	-3.95092	0.828053	-11.6172		0.56929	-21.6839	0.569102	-21.7874	0.568992	-3.69666	0.801561	-21.6012		0.20544	-21.4121	0.405072	-2.22613	0.402231	-1.71547	0.406941	-1.91491		0.87366	-21.3274	0.793641	-4.11827	0.793867	-4.23177	0.794304	-4.4447
0.62338	-11.0187	0.507721	0.77942	0.85818	-4.37991	0.885369	-11.558		0.62223	-21.6841	0.622	-21.7876	0.621866	-3.47318	0.872539	-21.6001		0.24617	-21.4121	0.443704	-1.68416	0.440668	-1.53917	0.445797	-2.00015		0.91577	-21.3274	0.833923	-4.11934	0.83422	-4.23054	0.834759	-4.43542
0.67654	-11.0495	0.566775	0.495494	0.92909	-3.96188	0.942684	-11.5111		0.67517	-21.6849	0.674899	-21.7882	0.674741	-3.43191	0.936269	-21.6015		0.28691	-21.4121	0.482335	-1.39013	0.479105	-1.56358	0.484653	-1.7223		0.95789	-21.3274	0.875442	-4.26801	0.875665	-4.38921	0.87607	-4.64283
0.72969	-11.0378	0.619216	0.73916	1	-3.81763	1	-11.4935		0.72811	-21.6859	0.727797	-21.7887	0.727616	-3.41942	1	-21.6034		0.32765	-21.4122	0.520967	-2.06567	0.517542	-1.30279	0.523509	-1.70609		1	-21.3273	0.916961	-4.52635	0.91711	-4.66747	0.91738	-4.94849
0.77667	-11.1578	0.671656	0.761056	0	--	0	--		0.77451	-21.6847	0.774081	-21.7878	0.773832	-3.3751	0	--		0.37398	-21.4121	0.559598	-2.42176	0.555979	-1.55079	0.562365	-1.73115		0	--	0.958481	-4.7141	0.958555	-4.75719	0.95869	-4.90167
0.82366	-11.2436	0.724096	1.13816	0	-3.18756	0	-8.67204		0.82091	-21.6838	0.820365	-21.7869	0.820048	-3.36771	0	-21.6033		0.42032	-21.4122	0.598191	-2.06627	0.594377	-1.30296	0.601182	-1.70604		0	-21.3272	1	-4.72206	1	-4.72015	1	-4.85743
0.87064	-11.2916	0.768944	0.850149	0.0709098	-3.80119	0.0546755	-9.06201		0.86731	-21.6837	0.86665	-21.7866	0.866263	-3.4907	0.0637306	-21.6015		0.46666	-21.4121	0.636783	-1.39155	0.632776	-1.56303	0.64	-1.72268		0.04211	-21.3265	0	--	0	--	0	--
0.91376	-11.1949	0.813793	0.771703	0.14182	-4.24089	0.109351	-9.52137		0.91154	-21.6837	0.9111	-21.7869	0.910842	-3.37597	0.127461	-21.5995		0.51299	-21.4121	0.675376	-1.68227	0.671174	-1.53847	0.678817	-1.99885		0.08423	-21.3264	0	-3.80337	0	-3.85846	0	-4.06859
0.95688	-11.0782	0.858641	0.879826	0.236109	-3.54935	0.164027	-9.94226		0.95577	-21.6838	0.95555	-21.7873	0.955421	-3.50407	0.195238	-21.6006		0.55933	-21.4121	0.713969	-2.22439	0.709573	-1.71543	0.717634	-1.9182		0.12634	-21.3269	0.0415193	-3.98862	0.0414449	-4.11489	0.0413101	-4.35006
1	-10.9483	0.905761	0.773128	0.330399	-3.13984	0.218702	-10.2749		1	-21.6839	1	-21.7874	1	-3.69666	0.263015	-21.6004		0.61076	-21.4121	0.754675	-2.29815	0.748344	-1.7596	0.759901	-2.01274		0.16845	-21.3273	0.0830387	-4.29138	0.0828899	-4.42026	0.0826203	-4.66088
0	--	0.95288	0.65787	0.409169	-3.40715	0.273378	-10.4885		0	--	0	--	0	--	0.330792	-21.5986		0.6622	-21.4121	0.795382	-2.35893	0.787115	-1.90438	0.802168	-2.04469		0.22124	-21.3273	0.124558	-4.26426	0.124335	-4.38886	0.12393	-4.64162
0	-10.9473	1	0.495494	0.487938	-3.42444	0.328053	-10.5623		0	-21.6838	0	-21.7847	0	-3.47967	0.410782	-21.6016		0.71363	-21.4122	0.836088	-2.62368	0.825886	-1.77027	0.844435	-2.7256		0.27403	-21.3271	0.166077	-4.11592	0.16578	-4.23004	0.165241	-4.43447
0.04312	-10.8122	0	--	0.566708	-3.18756	0.385369	-10.4778		0.04423	-21.6836	0.0444501	-21.7853	0.0445789	-3.50115	0.490773	-21.6021		0.75419	-21.4123	0.877066	-1.99193	0.869415	-1.53831	0.883327	-2.14838		0.32682	-21.3267	0.20639	-4.12108	0.20619	-4.24245	0.205814	-4.47967
0.08624	-10.6812	0	0.656963	0.645398	-3.42337	0.442684	-10.2359		0.08846	-21.6834	0.0889002	-21.786	0.0891577	-3.2884	0.570763	-21.6033		0.79475	-21.4122	0.918044	-2.06078	0.912943	-1.32857	0.922218	-1.56598		0.37306	-21.3271	0.246703	-4.2535	0.2466	-4.38304	0.246388	-4.63031
0.12936	-10.5657	0.0471196	0.837994	0.724089	-3.40886	0.5	-9.86521		0.13269	-21.6835	0.13335	-21.7865	0.133737	-3.14961	0.650673	-21.6021		0.8353	-21.4121	0.959022	-2.10257	0.956472	-1.20193	0.961109	-1.42848		0.4193	-21.3266	0.287015	-4.30542	0.28701	-4.44367	0.286962	-4.70302
0.17972	-10.5491	0.0942392	0.775731	0.791135	-3.72342	0.554676	-9.98513		0.18222	-21.6839	0.182718	-21.7868	0.183007	-3.29814	0.730584	-21.6016		0.87648	-21.4124	1	-2.42176	1	-1.55079	1	-1.73115		0.46554	-21.3261	0.327328	-4.43104	0.32742	-4.54211	0.327536	-4.76525
0.23009	-10.5902	0.141359	0.881474	0.85818	-4.24089	0.609351	-9.97679		0.23176	-21.6848	0.232086	-21.7877	0.232277	-3.41086	0.801561	-21.6011		0.91765	-21.4125	0	--	0	--	0	--		0.51178	-21.3267	0.373636	-4.3274	0.373728	-4.43678	0.373857	-4.6596
0.28045	-10.7708	0.188659	0.868621	0.92909	-3.80119	0.664027	-9.83014		0.28129	-21.6862	0.281454	-21.7885	0.281547	-3.5198	0.872539	-21.5995		0.95883	-21.4122	0	-1.34872	0	-1.1642	0	-1.68779		0.55802	-21.3272	0.419944	-4.09443	0.420035	-4.19483	0.420179	-4.40384
0.33082	-10.9421	0.235958	0.913339	1	-3.18756	0.718702	-9.55432		0.33083	-21.6872	0.330822	-21.7874	0.330817	-3.57412	0.936269	-21.6015		1	-21.4121	0.040978	-1.89998	0.0435284	-1.11212	0.0388911	-1.42314		0.60935	-21.3266	0.466253	-4.20399	0.466343	-4.32096	0.4665	-4.54407
0.3787	-10.8447	0.283258	1.23175	0	--	0.773378	-9.19896		0.37852	-21.6864	0.378478	-21.7884	0.378452	-3.4785	1	-21.6033		0	--	0.081956	-1.53451	0.0870568	-1.21868	0.0777823	-1.45577		0.66068	-21.3262	0.512561	-4.00065	0.51265	-4.11138	0.512822	-4.32672
0.42658	-10.7239	0.330558	1.69268	0	-3.11808	0.828053	-8.90585		0.42621	-21.6851	0.426134	-21.7874	0.426087	-3.40078	0	--		0	-21.4118	0.122934	-1.87622	0.130585	-1.31809	0.116673	-1.27526		0.71201	-21.3268	0.55887	-3.80337	0.558958	-3.85846	0.559143	-4.06859
0.47447	-10.7364	0.389612	1.35322	0.0709098	-3.42903	0.885369	-8.97244		0.47391	-21.6844	0.47379	-21.7862	0.473722	-3.30346	0	-21.6029		0.04117	-21.4118	0.163912	-2.0703	0.174114	-1.71761	0.155565	-1.21425		0.75185	-21.327	0.597421	-3.96177	0.597509	-4.07111	0.597706	-4.28506
0.52235	-10.8535	0.448667	0.978187	0.14182	-4.24088	0.942684	-8.88728		0.5216	-21.6839	0.521446	-21.7853	0.521357	-3.47331	0.0637306	-21.6007		0.08235	-21.4119	0.204886	-2.11641	0.211924	-1.49447	0.198981	-1.56033		0.7917	-21.3272	0.635973	-4.14202	0.63606	-4.25717	0.636269	-4.47777
0.57023	-10.9473	0.507721	0.85827	0.236109	-3.54897	1	-8.67204		0.56929	-21.6838	0.569102	-21.7847	0.568992	-3.47967	0.127461	-21.5995		0.12352	-21.4119	0.245861	-1.55559	0.249735	-1.08917	0.242397	-1.61549		0.83155	-21.3273	0.674525	-4.216	0.674611	-4.33956	0.674831	-4.57699
0.62338	-10.8416	0.566775	0.656963	0.330399	-3.13984	0	--		0.62223	-21.684	0.622	-21.7853	0.621866	-3.44563	0.195238	-21.6006		0.1647	-21.4121	0.286835	-1.30379	0.287546	-1.21864	0.285813	-1.05323		0.87366	-21.3269	0.713076	-4.1005	0.713162	-4.20976	0.713394	-4.42591
0.67654	-10.7083	0.619216	0.817606	0.409169	-3.30482	0	-8.6718		0.67517	-21.6846	0.674899	-21.7864	0.674741	-3.32296	0.263015	-21.6003		0.20544	-21.4121	0.32781	-0.851682	0.325357	-0.599705	0.329229	-0.768459		0.91577	-21.3264	0.753358	-4.09351	0.753515	-4.19943	0.753849	-4.41718
0.72969	-10.7658	0.671656	0.888344	0.487938	-3.3917	0.0546755	-8.5598		0.72811	-21.6855	0.727797	-21.7879	0.727616	-3.38383	0.330792	-21.5986		0.24617	-21.4121	0.366441	-1.47129	0.363794	-1.06514	0.368085	-1.30521		0.95789	-21.3265	0.793641	-4.11246	0.793867	-4.2216	0.794304	-4.4254
0.77667	-10.5861	0.724096	1.15521	0.566708	-3.11808	0.109351	-8.80251		0.77451	-21.6845	0.774081	-21.7871	0.773832	-3.32063	0.410782	-21.6001		0.28691	-21.4121	0.405072	-2.03624	0.402231	-1.39437	0.406941	-1.63072		1	-21.3272	0.833923	-4.11592	0.83422	-4.23004	0.834759	-4.43447
0.82366	-10.5884	0.768944	0.90235	0.645398	-3.39203	0.164027	-9.19054		0.82091	-21.6838	0.820365	-21.7867	0.820048	-3.29	0.490773	-21.602		0.32765	-21.4121	0.443704	-1.68146	0.440668	-1.43647	0.445797	-1.47755		0	--	0.875442	-4.26426	0.875665	-4.38886	0.87607	-4.64162
0.87064	-10.5657	0.813793	0.838956	0.724089	-3.30496	0.218702	-9.5529		0.86731	-21.6835	0.86665	-21.7865	0.866263	-3.14961	0.570763	-21.6029		0.37398	-21.4121	0.482335	-1.33858	0.479105	-1.32911	0.484653	-1.49056		0	-21.3269	0.916961	-4.29138	0.91711	-4.42026	0.91738	-4.66088
0.91376	-10.6812	0.858641	0.881474	0.791135	-3.65913	0.273378	-9.80392		0.91154	-21.6834	0.9111	-21.786	0.910842	-3.2884	0.650673	-21.602		0.42032	-21.4121	0.520967	-1.48375	0.517542	-1.20541	0.523509	-1.39031		0.04211	-21.3264	0.958481	-3.98862	0.958555	-4.11489	0.95869	-4.35006
0.95688	-10.8122	0.905761	0.775731	0.85818	-4.24088	0.328053	-9.89384		0.95577	-21.6836	0.95555	-21.7853	0.955421	-3.50115	0.730584	-21.6001		0.46666	-21.4121	0.559598	-1.34872	0.555979	-1.1642	0.562365	-1.68779		0.08423	-21.3257	1	-3.80337	1	-3.85846	1	-4.06859
1	-10.9473	0.95288	0.837994	0.92909	-3.42903	0.385369	-9.79242		1	-21.6838	1	-21.7847	1	-3.47967	0.801561	-21.6006		0.51299	-21.4119	0.598191	-1.48382	0.594377	-1.20533	0.601182	-1.39041		0.12634	-21.3266	0	--	0	--	0	--
0	--	1	0.656963	1	-3.11808	0.442684	-9.51184		0	--	0	--	0	--	0.872539	-21.5995		0.55933	-21.4118	0.636783	-1.33897	0.632776	-1.32877	0.64	-1.48958		0.16845	-21.3272	0	-3.80164	0	-3.85271	0	-4.05532
0	-10.3988	0	--	0	--	0.5	-9.86478		0	-21.6837	0	-21.7847	0	-3.21255	0.936269	-21.6007		0.61076	-21.4119	0.675376	-1.67956	0.671174	-1.43726	0.678817	-1.4783		0.22124	-21.3272	0.0415193	-3.81148	0.0414449	-3.87661	0.0413101	-4.0703
0.04312	-10.4184	0	0.665536	0	-3.03798	0.554676	-9.63212		0.04423	-21.6835	0.0444501	-21.7853	0.0445789	-3.2733	1	-21.6029		0.6622	-21.4121	0.713969	-2.03969	0.709573	-1.39196	0.717634	-1.62846		0.27403	-21.3271	0.0830387	-3.75854	0.0828899	-3.86082	0.0826203	-4.07177
0.08624	-10.4755	0.0471196	0.855846	0.0709098	-3.40143	0.609351	-9.42189		0.08846	-21.6833	0.0889002	-21.7859	0.0891577	-3.28821	0	--		0.71363	-21.4121	0.754675	-1.78175	0.748344	-1.73334	0.759901	-1.33395		0.32682	-21.3267	0.124558	-3.83257	0.124335	-3.9369	0.12393	-4.14891
0.12936	-10.5657	0.0942392	1.04474	0.14182	-3.66515	0.664027	-9.34668		0.13269	-21.6835	0.13335	-21.7865	0.133737	-3.1496	0	-21.601		0.75419	-21.412	0.795382	-2.24716	0.787115	-1.76018	0.802168	-1.54227		0.37306	-21.3265	0.166077	-3.96794	0.16578	-4.06977	0.165241	-4.30311
0.17972	-10.5491	0.141359	0.881506	0.236109	-3.49791	0.718702	-9.13559		0.18222	-21.6838	0.182718	-21.7868	0.183007	-3.2981	0.0637306	-21.6004		0.79475	-21.412	0.836088	-2.0703	0.825886	-1.71761	0.844435	-1.21425		0.4193	-21.3261	0.20639	-4.02532	0.20619	-4.12348	0.205814	-4.33667
0.23009	-10.5902	0.188659	0.869535	0.330399	-3.12987	0.773378	-8.90502		0.23176	-21.6848	0.232086	-21.7877	0.232277	-3.41081	0.127461	-21.5994		0.8353	-21.4121	0.877066	-1.87622	0.869415	-1.31809	0.883327	-1.27526		0.46554	-21.3259	0.246703	-4.11883	0.2466	-4.22012	0.246388	-4.44245
0.28045	-10.7708	0.235958	0.915233	0.409169	-3.21268	0.828053	-8.90511		0.28129	-21.6862	0.281454	-21.7885	0.281547	-3.51976	0.195238	-21.6		0.87648	-21.4119	0.918044	-1.53451	0.912943	-1.21868	0.922218	-1.45577		0.51178	-21.3265	0.287015	-4.28187	0.28701	-4.38877	0.286962	-4.61768
0.33082	-10.9421	0.283258	1.23255	0.487938	-3.28028	0.885369	-8.67668		0.33083	-21.6872	0.330822	-21.7874	0.330817	-3.5741	0.263015	-21.5995		0.91765	-21.4119	0.959022	-1.89998	0.956472	-1.11212	0.961109	-1.42314		0.55802	-21.3269	0.327328	-4.43088	0.32742	-4.54148	0.327536	-4.75716
0.3787	-10.7614	0.330558	1.69291	0.566708	-3.03798	0.942684	-8.34643		0.37852	-21.6864	0.378478	-21.7883	0.378452	-3.34645	0.330792	-21.5986		0.95883	-21.4118	1	-1.34872	1	-1.1642	1	-1.68779		0.60935	-21.3264	0.373636	-4.27587	0.373728	-4.39318	0.373857	-4.62395
0.42658	-10.6046	0.389612	1.56429	0.645398	-3.28019	1	-8.6718		0.42621	-21.6851	0.426134	-21.7874	0.426087	-3.39085	0.410782	-21.5996		1	-21.4118	0	--	0	--	0	--		0.66068	-21.3259	0.419944	-3.95536	0.420035	-4.09107	0.420179	-4.32416
0.47447	-10.5885	0.448667	1.0069	0.724089	-3.21293	0	--		0.47391	-21.6843	0.47379	-21.7861	0.473722	-3.25525	0.490773	-21.6013		0	--	0	-1.34829	0	-0.93596	0	-1.42096		0.71201	-21.3262	0.466253	-4.13121	0.466343	-4.25615	0.4665	-4.49311
0.52235	-10.4507	0.507721	0.98696	0.791135	-3.61281	0	-8.09039		0.5216	-21.6838	0.521446	-21.7852	0.521357	-3.36715	0.570763	-21.601		0	-11.8071	0.040978	-1.02469	0.0435284	-1.03573	0.0388911	-1.40205		0.75185	-21.3266	0.512561	-3.91619	0.51265	-4.04057	0.512822	-4.27387
0.57023	-10.3988	0.566775	0.665536	0.85818	-3.66515	0.0546755	-8.32195		0.56929	-21.6837	0.569102	-21.7847	0.568992	-3.21255	0.650673	-21.6013		0.04117	-11.7879	0.081956	-1.17069	0.0870568	-0.730149	0.0777823	-1.35009		0.7917	-21.327	0.55887	-3.80164	0.558958	-3.85271	0.559143	-4.05532
0.62338	-10.4656	0.619216	1.01133	0.92909	-3.40143	0.109351	-8.61962		0.62223	-21.6839	0.622	-21.7853	0.621866	-3.37846	0.730584	-21.5997		0.08235	-11.7308	0.122934	-1.87203	0.130585	-1.30349	0.116673	-1.21142		0.83155	-21.3272	0.597421	-3.87512	0.597509	-3.99892	0.597706	-4.23128
0.67654	-10.619	0.671656	0.959916	1	-3.03798	0.164027	-8.78805		0.67517	-21.6845	0.674899	-21.7864	0.674741	-3.19849	0.801561	-21.6001		0.12352	-11.638	0.163912	-2.06981	0.174114	-1.71747	0.155565	-1.20826		0.87366	-21.3266	0.635973	-4.06554	0.63606	-4.1908	0.636269	-4.42687
0.72969	-10.6377	0.724096	1.44516	0	--	0.218702	-8.81349		0.72811	-21.6855	0.727797	-21.7878	0.727616	-3.32925	0.872539	-21.5994		0.1647	-11.5135	0.204886	-2.1161	0.211924	-1.48929	0.198981	-1.55804		0.91577	-21.3257	0.674525	-4.09503	0.674611	-4.21283	0.674831	-4.45414
0.77667	-10.5834	0.768944	1.03637	0	-3.02176	0.273378	-8.71175		0.77451	-21.6844	0.774081	-21.7871	0.773832	-3.24623	0.936269	-21.6004		0.20544	-11.4967	0.245861	-1.55523	0.249735	-1.0824	0.242397	-1.61129		0.95789	-21.3264	0.713076	-4.06966	0.713162	-4.17015	0.713394	-4.3909
0.82366	-10.5196	0.813793	1.12153	0.0709098	-3.36003	0.328053	-8.50174		0.82091	-21.6837	0.820365	-21.7866	0.820048	-3.23377	1	-21.601		0.24617	-11.4469	0.286835	-1.30289	0.287546	-1.21444	0.285813	-1.04016		1	-21.3269	0.753358	-4.08109	0.753515	-4.19632	0.753849	-4.41151
0.87064	-10.5657	0.858641	0.881506	0.14182	-3.66514	0.385369	-8.90861		0.86731	-21.6835	0.86665	-21.7865	0.866263	-3.1496	0	--		0.28691	-11.3667	0.32781	-0.851671	0.325357	-0.599563	0.329229	-0.767846		0	--	0.793641	-3.97161	0.793867	-4.0801	0.794304	-4.29593
0.91376	-10.4755	0.905761	1.04474	0.236109	-3.48786	0.442684	-9.40336		0.91154	-21.6833	0.9111	-21.7859	0.910842	-3.28821	0	-21.5982		0.32765	-11.2607	0.366441	-1.20751	0.363794	-1.01989	0.368085	-1.11087		0	-21.3256	0.833923	-3.96794	0.83422	-4.06977	0.834759	-4.30311
0.95688	-10.4184	0.95288	0.855846	0.330399	-3.12986	0.5	-9.11144		0.95577	-21.6835	0.95555	-21.7853	0.955421	-3.2733	0.0637306	-21.5992		0.37398	-11.4424	0.405072	-0.979829	0.402231	-1.15596	0.406941	-1.22393		0.04211	-21.3258	0.875442	-3.83257	0.875665	-3.9369	0.87607	-4.14891
1	-10.3988	1	0.665536	0.409169	-2.99	0.554676	-9.33775		1	-21.6837	1	-21.7847	1	-3.21255	0.127461	-21.5993		0.42032	-11.5959	0.443704	-1.14212	0.440668	-0.788721	0.445797	-0.996591		0.08423	-21.3255	0.916961	-3.75854	0.91711	-3.86082	0.91738	-4.07177
0	--	0	--	0.487938	-2.84915	0.609351	-9.30172		0	--	0	--	0	--	0.195238	-21.5999		0.46666	-11.7115	0.482335	-1.33692	0.479105	-0.980928	0.484653	-1.17631		0.12634	-21.3251	0.958481	-3.81148	0.958555	-3.87661	0.95869	-4.0703
0	-10.326	0	1.19888	0.566708	-3.02176	0.664027	-8.88815		0	-21.683	0	-21.7846	0	-3.21183	0.263015	-21.5994		0.51299	-11.783	0.520967	-1.48223	0.517542	-0.971412	0.523509	-1.26992		0.16845	-21.3247	1	-3.80164	1	-3.85271	1	-4.05532
0.04312	-10.3215	0.0471196	0.938294	0.645398	-2.84948	0.718702	-8.40872		0.04423	-21.6831	0.0444501	-21.7842	0.0445789	-3.08557	0.330792	-21.5986		0.55933	-11.8071	0.559598	-1.34829	0.555979	-0.93596	0.562365	-1.42096		0.22124	-21.3251	0	--	0	--	0	--
0.08624	-10.309	0.0942392	1.04852	0.724089	-2.98963	0.773378	-7.89444		0.08846	-21.6832	0.0889002	-21.7837	0.0891577	-3.24195	0.410782	-21.5996		0.61076	-11.7774	0.598191	-1.48229	0.594377	-0.971355	0.601182	-1.27018		0.27403	-21.3258	0	-3.75452	0	-3.84579	0	-4.01113
0.12936	-10.2916	0.141359	0.971269	0.791135	-3.54379	0.828053	-7.42377		0.13269	-21.683	0.13335	-21.7834	0.133737	-3.14939	0.490773	-21.6		0.6622	-11.6897	0.636783	-1.33731	0.632776	-0.981082	0.64	-1.17699		0.32682	-21.3266	0.0415193	-3.81066	0.0414449	-3.8724	0.0413101	-4.06533
0.17972	-10.422	0.188659	1.23098	0.85818	-3.66514	0.885369	-7.92605		0.18222	-21.6833	0.182718	-21.7837	0.183007	-3.17808	0.570763	-21.5982		0.71363	-11.5491	0.675376	-1.14269	0.671174	-0.789532	0.678817	-0.994545		0.37306	-21.3263	0.0830387	-3.75254	0.0828899	-3.8557	0.0826203	-4.05892
0.23009	-10.5013	0.235958	1.46648	0.92909	-3.36003	0.942684	-8.32633		0.23176	-21.6843	0.232086	-21.7846	0.232277	-3.17683	0.650673	-21.6		0.75419	-11.5709	0.713969	-0.980357	0.709573	-1.15711	0.717634	-1.22494		0.4193	-21.326	0.124558	-3.8266	0.124335	-3.93358	0.12393	-4.13764
0.28045	-10.4289	0.283258	1.52661	1	-3.02176	1	-8.09039		0.28129	-21.6856	0.281454	-21.786	0.281547	-3.29769	0.730584	-21.5996		0.79475	-11.5589	0.754675	-1.27074	0.748344	-1.38501	0.759901	-1.18788		0.46554	-21.3257	0.166077	-3.96702	0.16578	-4.06937	0.165241	-4.30183
0.33082	-10.344	0.330558	1.69364	0	--	0	--		0.33083	-21.6872	0.330822	-21.7874	0.330817	-3.14564	0.801561	-21.5994		0.8353	-11.5135	0.795382	-1.85225	0.787115	-1.1441	0.802168	-1.47128		0.51178	-21.3258	0.20639	-4.00507	0.20619	-4.12319	0.205814	-4.33621
0.3787	-10.4692	0.389612	1.59949	0	-2.9569	0	-7.201		0.37852	-21.6861	0.378478	-21.7863	0.378452	-3.3388	0.872539	-21.5993		0.87648	-11.638	0.836088	-2.06981	0.825886	-1.71747	0.844435	-1.20826		0.55802	-21.3256	0.246703	-4.09941	0.2466	-4.21955	0.246388	-4.44228
0.42658	-10.5781	0.448667	1.17332	0.0709098	-2.78774	0.0546755	-6.97174		0.42621	-21.6851	0.426134	-21.7854	0.426087	-3.1813	0.936269	-21.5992		0.91765	-11.7308	0.877066	-1.87203	0.869415	-1.30349	0.883327	-1.21142		0.60935	-21.3258	0.287015	-4.26742	0.28701	-4.38806	0.286962	-4.61752
0.47447	-10.4144	0.507721	0.998274	0.14182	-2.46902	0.109351	-7.28437		0.47391	-21.684	0.47379	-21.7848	0.473722	-3.22433	1	-21.5982		0.95883	-11.7879	0.918044	-1.17069	0.912943	-0.730149	0.922218	-1.35009		0.66068	-21.3255	0.327328	-4.41924	0.32742	-4.54089	0.327536	-4.75613
0.52235	-10.3968	0.566775	1.19888	0.236109	-2.65511	0.164027	-7.63586		0.5216	-21.6832	0.521446	-21.7846	0.521357	-3.21181	0	--		1	-11.8071	0.959022	-1.02469	0.956472	-1.03573	0.961109	-1.40205		0.71201	-21.3261	0.373636	-4.18011	0.373728	-4.28736	0.373857	-4.51445
0.57023	-10.326	0.619216	1.04947	0.330399	-3.04328	0.218702	-7.93669		0.56929	-21.683	0.569102	-21.7846	0.568992	-3.21183	0	-21.5981		0	--	1	-1.34829	1	-0.93596	1	-1.42096		0.75185	-21.3255	0.419944	-3.94362	0.420035	-4.04626	0.420179	-4.26185
0.62338	-10.3963	0.671656	1.07907	0.409169	-2.94714	0.273378	-8.19505		0.62223	-21.6833	0.622	-21.7846	0.621866	-3.22213	0.0637306	-21.5981		0	-10.9111	0	--	0	--	0	--		0.7917	-21.325	0.466253	-3.66345	0.466343	-3.7081	0.4665	-3.89371
0.67654	-10.4474	0.724096	1.66159	0.487938	-2.82504	0.328053	-8.50024		0.67517	-21.6842	0.674899	-21.7849	0.674741	-3.19152	0.127461	-21.5992		0.04117	-11.0299	0	-1.34614	0	-0.254041	0	-0.485563		0.83155	-21.3247	0.512561	-3.80448	0.51265	-3.88346	0.512822	-4.09097
0.72969	-10.5597	0.768944	1.44004	0.566708	-2.9569	0.385369	-8.40405		0.72811	-21.6854	0.727797	-21.7857	0.727616	-3.32791	0.195238	-21.5986		0.08235	-11.198	0.040978	-1.02194	0.0435284	-0.346552	0.0388911	-1.07116		0.87366	-21.3251	0.55887	-3.75452	0.558958	-3.84579	0.559143	-4.01113
0.77667	-10.5121	0.813793	1.1478	0.645398	-2.8249	0.442684	-8.68286		0.77451	-21.6842	0.774081	-21.7846	0.773832	-3.12088	0.263015	-21.5992		0.12352	-11.3637	0.081956	-1.16776	0.0870568	-0.419875	0.0777823	-1.33848		0.91577	-21.3255	0.597421	-3.81651	0.597509	-3.88939	0.597706	-4.09161
0.82366	-10.4174	0.858641	0.971269	0.724089	-2.94655	0.5	-9.11069		0.82091	-21.6833	0.820365	-21.7837	0.820048	-3.19725	0.330792	-21.5953		0.1647	-11.5135	0.122934	-0.961504	0.130585	-1.01722	0.116673	-0.918339		0.95789	-21.3258	0.635973	-3.70469	0.63606	-3.74962	0.636269	-3.96105
0.87064	-10.2916	0.905761	1.04852	0.791135	-2.52006	0.554676	-8.76938		0.86731	-21.683	0.86665	-21.7834	0.866263	-3.14939	0.410782	-21.5994		0.20544	-11.4967	0.163912	-0.430487	0.174114	-1.23092	0.155565	-0.262894		1	-21.3256	0.674525	-3.70254	0.674611	-3.79765	0.674831	-4.0039
0.91376	-10.309	0.95288	0.938294	0.85818	-2.46902	0.609351	-8.34102		0.91154	-21.6832	0.9111	-21.7837	0.910842	-3.24195	0.490773	-21.5986		0.24617	-11.4469	0.204886	-0.458632	0.211924	-1.02525	0.198981	-0.188328		0	--	0.713076	-4.00161	0.713162	-4.11658	0.713394	-4.34028
0.95688	-10.3215	1	1.19888	0.92909	-2.78774	0.664027	-7.86272		0.95577	-21.6831	0.95555	-21.7842	0.955421	-3.08557	0.570763	-21.5981		0.28691	-11.3667	0.245861	-1.03677	0.249735	-1.00131	0.242397	-0.624545		0	-21.3255	0.753358	-3.88598	0.753515	-3.99506	0.753849	-4.22213
1	-10.326	0	--	1	-2.9569	0.718702	-7.41394		1	-21.683	1	-21.7846	1	-3.21183	0.650673	-21.5986		0.32765	-11.2607	0.286835	-1.03089	0.287546	-0.679672	0.285813	-1.03167		0.04211	-21.3257	0.793641	-3.94717	0.793867	-4.05658	0.794304	-4.28439
0	--	0	1.20324	0	--	0.773378	-7.20097		0	--	0	--	0	--	0.730584	-21.5994		0.37398	-11.2468	0.32781	-0.85061	0.325357	-0.591276	0.329229	-0.756966		0.08423	-21.3255	0.833923	-3.96702	0.83422	-4.06937	0.834759	-4.30183
0	-10.326	0.0471196	1.15741	0	-2.75115	0.828053	-7.42327		0	-21.683	0	-21.7846	0	-3.11661	0.801561	-21.5993		0.42032	-11.1982	0.366441	-0.882622	0.363794	-0.869058	0.368085	-0.980396		0.12634	-21.3246	0.875442	-3.8266	0.875665	-3.93358	0.87607	-4.13764
0.04312	-10.3214	0.0942392	1.29021	0.0709098	-2.48864	0.885369	-7.04656		0.04423	-21.6831	0.0444501	-21.7841	0.0445789	-3.08483	0.872539	-21.5992		0.46666	-11.1198	0.405072	-0.978402	0.402231	-0.604388	0.406941	-0.645477		0.16845	-21.3247	0.916961	-3.75254	0.91711	-3.8557	0.91738	-4.05892
0.08624	-10.309	0.141359	0.971336	0.14182	-2.46901	0.942684	-7.1615		0.08846	-21.6832	0.0889002	-21.7837	0.0891577	-2.89476	0.936269	-21.5981		0.51299	-11.0201	0.443704	-1.14042	0.440668	-0.733952	0.445797	-0.773355		0.22124	-21.325	0.958481	-3.81066	0.958555	-3.8724	0.95869	-4.06533
0.12936	-10.2916	0.188659	1.23216	0.236109	-2.6452	1	-7.201		0.13269	-21.683	0.13335	-21.7834	0.133737	-3.14933	1	-21.5981		0.55933	-10.9111	0.482335	-1.04532	0.479105	-0.282623	0.484653	-0.550539		0.27403	-21.3258	1	-3.75452	1	-3.84579	1	-4.01113
0.17972	-10.422	0.235958	1.4705	0.330399	-3.04327	0	--		0.18222	-21.6833	0.182718	-21.7837	0.183007	-3.17803	0	--		0.61076	-11.0318	0.520967	-0.870394	0.517542	-0.465277	0.523509	-0.622548		0.32682	-21.3266	0	--	0	--	0	--
0.23009	-10.5012	0.283258	1.52956	0.409169	-2.68729	0	-6.99806		0.23176	-21.6843	0.232086	-21.7846	0.232277	-3.17678	0	-21.597		0.6622	-11.1393	0.559598	-1.34614	0.555979	-0.254041	0.562365	-0.485563		0.37306	-21.326	0	-3.74588	0	-3.84545	0	-4.01062
0.28045	-10.4289	0.330558	1.69371	0.487938	-2.76351	0.0546755	-6.96775		0.28129	-21.6856	0.281454	-21.786	0.281547	-3.29763	0.0637306	-21.5976		0.71363	-11.2179	0.598191	-0.870742	0.594377	-0.465263	0.601182	-0.622576		0.4193	-21.3255	0.0415193	-3.75162	0.0414449	-3.85517	0.0413101	-4.06251
0.33082	-10.344	0.389612	1.89603	0.566708	-2.75115	0.109351	-7.28075		0.33083	-21.6872	0.330822	-21.7873	0.330817	-3.14562	0.127461	-21.599		0.75419	-11.3314	0.636783	-1.04417	0.632776	-0.282921	0.64	-0.550603		0.46554	-21.3255	0.0830387	-3.71291	0.0828899	-3.80248	0.0826203	-4.01638
0.3787	-10.3641	0.448667	1.36797	0.645398	-2.76414	0.164027	-7.63313		0.37852	-21.6861	0.378478	-21.7863	0.378452	-3.31078	0.195238	-21.5985		0.79475	-11.4365	0.675376	-1.14099	0.671174	-0.731911	0.678817	-0.774434		0.51178	-21.3257	0.124558	-3.5028	0.124335	-3.5911	0.12393	-3.78964
0.42658	-10.3797	0.507721	1.03802	0.724089	-2.68633	0.218702	-7.93471		0.42621	-21.6851	0.426134	-21.7854	0.426087	-3.18103	0.263015	-21.5991		0.8353	-11.5135	0.713969	-0.978927	0.709573	-0.604006	0.717634	-0.64417		0.55802	-21.3255	0.166077	-3.95376	0.16578	-4.06886	0.165241	-4.29971
0.47447	-10.3905	0.566775	1.20324	0.791135	-2.5066	0.273378	-8.13643		0.47391	-21.684	0.47379	-21.7847	0.473722	-3.11582	0.330792	-21.5953		0.87648	-11.3637	0.754675	-1.12079	0.748344	-0.823431	0.759901	-0.677913		0.60935	-21.3257	0.20639	-3.68716	0.20619	-3.7775	0.205814	-3.97412
0.52235	-10.2979	0.619216	1.12142	0.85818	-2.46901	0.328053	-8.20633		0.5216	-21.6832	0.521446	-21.7845	0.521357	-3.02695	0.410782	-21.5993		0.91765	-11.198	0.795382	-0.539043	0.787115	-1.09689	0.802168	-0.375165		0.66068	-21.3255	0.246703	-3.90701	0.2466	-4.00148	0.246388	-4.21117
0.57023	-10.326	0.671656	1.2358	0.92909	-2.48864	0.385369	-8.17419		0.56929	-21.683	0.569102	-21.7846	0.568992	-3.11661	0.490773	-21.5984		0.95883	-11.0299	0.836088	-0.430487	0.825886	-1.23092	0.844435	-0.262894		0.71201	-21.3256	0.287015	-4.22548	0.28701	-4.32544	0.286962	-4.54242
0.62338	-10.3075	0.724096	1.76889	1	-2.75115	0.442684	-8.0793		0.62223	-21.6833	0.622	-21.7845	0.621866	-3.01845	0.570763	-21.597		1	-10.9111	0.877066	-0.961504	0.869415	-1.01722	0.883327	-0.918339		0.75185	-21.3251	0.327328	-4.23999	0.32742	-4.37163	0.327536	-4.63933
0.67654	-10.3885	0.768944	1.44409	0	--	0.5	-7.9277		0.67517	-21.6842	0.674899	-21.7848	0.674741	-3.17304	0.650673	-21.5984		0	--	0.918044	-1.16776	0.912943	-0.419875	0.922218	-1.33848		0.7917	-21.3248	0.373636	-4.13919	0.373728	-4.24422	0.373857	-4.45541
0.72969	-10.375	0.813793	1.21153	0	-2.7212	0.554676	-7.88902		0.72811	-21.6854	0.727797	-21.7856	0.727616	-3.23515	0.730584	-21.5993		0	-10.9106	0.959022	-1.02194	0.956472	-0.346552	0.961109	-1.07116		0.83155	-21.3247	0.419944	-3.84053	0.420035	-3.94392	0.420179	-4.15642
0.77667	-10.4538	0.858641	0.971336	0.0709098	-2.23438	0.609351	-7.72633		0.77451	-21.6842	0.774081	-21.7845	0.773832	-3.08221	0.801561	-21.5983		0.04117	-10.8995	1	-1.34614	1	-0.254041	1	-0.485563		0.87366	-21.3246	0.466253	-3.58329	0.466343	-3.68289	0.4665	-3.87213
0.82366	-10.3918	0.905761	1.29021	0.14182	-2.11079	0.664027	-7.4719		0.82091	-21.6833	0.820365	-21.7837	0.820048	-3.13194	0.872539	-21.599		0.08235	-10.8661	0	--	0	--	0	--		0.91577	-21.3255	0.512561	-3.76503	0.51265	-3.81034	0.512822	-3.97533
0.87064	-10.2916	0.95288	1.15741	0.236109	-2.36842	0.718702	-7.18735		0.86731	-21.683	0.86665	-21.7834	0.866263	-3.14933	0.936269	-21.5976		0.12352	-10.8146	0	-1.3436	0	-0.250319	0	-0.422792		0.95789	-21.3257	0.55887	-3.74588	0.558958	-3.84545	0.559143	-4.01062
0.91376	-10.309	1	1.20324	0.330399	-3.03559	0.773378	-6.95682		0.91154	-21.6832	0.9111	-21.7837	0.910842	-2.89476	1	-21.597		0.1647	-10.7515	0.040978	-0.758909	0.0435284	-0.339094	0.0388911	-0.108364		1	-21.3255	0.597421	-3.77535	0.597509	-3.82087	0.597706	-3.98611
0.95688	-10.3214	0	--	0.409169	-2.48318	0.828053	-6.8586		0.95577	-21.6831	0.95555	-21.7841	0.955421	-3.08483	0	--		0.20544	-10.8681	0.081956	-0.171058	0.0870568	-0.291518	0.0777823	0.235649		0	--	0.635973	-3.64743	0.63606	-3.74246	0.636269	-3.91348
1	-10.326	0	1.61686	0.487938	-2.59905	0.885369	-6.89108		1	-21.683	1	-21.7846	1	-3.11661	0	-21.5969		0.24617	-11.0007	0.122934	0	0.130585	-0.820874	0.116673	0.384714		0	-21.3254	0.674525	-3.663	0.674611	-3.76421	0.674831	-3.96329
0	--	0.0471196	1.16161	0.566708	-2.7212	0.942684	-6.96489		0	--	0	--	0	--	0.0637306	-21.5973		0.28691	-11.1355	0.163912	-0.430151	0.174114	-1.23061	0.155565	-0.246128		0.04211	-21.325	0.713076	-3.93809	0.713162	-4.03704	0.713394	-4.2445
0	-10.2552	0.0942392	1.29666	0.645398	-2.59865	1	-6.99806		0	-21.6828	0	-21.783	0	-3.11629	0.127461	-21.5977		0.32765	-11.2607	0.204886	-0.458317	0.211924	-1.02373	0.198981	-0.177191		0.08423	-21.3255	0.753358	-3.83351	0.753515	-3.9618	0.753849	-4.19215
0.04312	-10.2602	0.141359	0.97941	0.724089	-2.48397	0	--		0.04423	-21.6828	0.0444501	-21.783	0.0445789	-2.99293	0.195238	-21.5975		0.37398	-11.2383	0.245861	-1.03616	0.249735	-0.999176	0.242397	-0.620208		0.12634	-21.3245	0.793641	-3.90537	0.793867	-4.01613	0.794304	-4.24501
0.08624	-10.2737	0.188659	1.42123	0.791135	-2.39413	0	-6.99806		0.08846	-21.6828	0.0889002	-21.7831	0.0891577	-2.88472	0.263015	-21.5985		0.42032	-11.1816	0.286835	-1.0303	0.287546	-0.671999	0.285813	-1.02501		0.16845	-21.324	0.833923	-3.95376	0.83422	-4.06886	0.834759	-4.29971
0.12936	-10.2916	0.235958	1.70586	0.85818	-2.11079	0.0546755	-6.96759		0.13269	-21.6829	0.13335	-21.7833	0.133737	-3.01091	0.330792	-21.5952		0.46666	-11.0956	0.32781	-0.850578	0.325357	-0.590977	0.329229	-0.756502		0.22124	-21.324	0.875442	-3.5028	0.875665	-3.5911	0.87607	-3.78964
0.17972	-10.2207	0.283258	2.20514	0.92909	-2.23438	0.109351	-6.87817		0.18222	-21.6833	0.182718	-21.7837	0.183007	-2.96638	0.410782	-21.5991		0.51299	-10.9897	0.366441	-0.881809	0.363794	-0.351284	0.368085	-0.588398		0.27403	-21.3239	0.916961	-3.71291	0.91711	-3.80248	0.91738	-4.01638
0.23009	-10.216	0.330558	2.07888	1	-2.7212	0.164027	-7.33563		0.23176	-21.6842	0.232086	-21.7846	0.232277	-3.158	0.490773	-21.598		0.55933	-10.9106	0.405072	-0.765425	0.402231	-0.14693	0.406941	-0.46795		0.32682	-21.3237	0.958481	-3.75162	0.958555	-3.85517	0.95869	-4.06251
0.28045	-10.2651	0.389612	1.992	0	--	0.218702	-7.80377		0.28129	-21.6856	0.281454	-21.7859	0.281547	-3.07065	0.570763	-21.5969		0.61076	-11.002	0.443704	-0.739929	0.440668	-0.139403	0.445797	-0.431372		0.37306	-21.3242	1	-3.74588	1	-3.84545	1	-4.01062
0.33082	-10.344	0.448667	1.94637	0	-2.21224	0.273378	-8.13507		0.33083	-21.6871	0.330822	-21.7873	0.330817	-3.14556	0.650673	-21.598		0.6622	-11.1166	0.482335	-1.04264	0.479105	-0.20626	0.484653	-0.245955		0.4193	-21.3249	0	--	0	--	0	--
0.3787	-10.3208	0.507721	1.26645	0.0709098	-2.18384	0.328053	-8.20528		0.37852	-21.6859	0.378478	-21.7862	0.378452	-3.15572	0.730584	-21.5991		0.71363	-11.2039	0.520967	-0.868243	0.517542	-0.19785	0.523509	-0.126383		0.46554	-21.3253	0	-3.65534	0	-3.77365	0	-4.00289
0.42658	-10.2968	0.566775	1.61686	0.14182	-2.11078	0.385369	-8.17314		0.42621	-21.6846	0.426134	-21.7851	0.426087	-3.16592	0.801561	-21.5978		0.75419	-11.0498	0.559598	-1.3436	0.555979	-0.250319	0.562365	-0.422792		0.51178	-21.3252	0.0415193	-3.74353	0.0414449	-3.84953	0.0413101	-4.0522
0.47447	-10.2754	0.619216	1.17012	0.236109	-2.3632	0.442684	-8.07825		0.47391	-21.6836	0.47379	-21.7841	0.473722	-3.1079	0.872539	-21.5977		0.79475	-10.8893	0.598191	-0.868592	0.594377	-0.197856	0.601182	-0.12627		0.55802	-21.3254	0.0830387	-3.71003	0.0828899	-3.79711	0.0826203	-4.00757
0.52235	-10.2606	0.671656	1.8604	0.330399	-3.03559	0.5	-7.92727		0.5216	-21.683	0.521446	-21.7833	0.521357	-2.97121	0.936269	-21.5973		0.8353	-10.7515	0.636783	-1.04149	0.632776	-0.205912	0.64	-0.24481		0.60935	-21.3251	0.124558	-3.49723	0.124335	-3.58554	0.12393	-3.7787
0.57023	-10.2552	0.724096	1.80009	0.409169	-2.38008	0.554676	-7.88793		0.56929	-21.6828	0.569102	-21.783	0.568992	-3.11629	1	-21.5969		0.87648	-10.8146	0.675376	-0.741399	0.671174	-0.139879	0.678817	-0.431388		0.66068	-21.3252	0.166077	-3.95067	0.16578	-4.06812	0.165241	-4.29967
0.62338	-10.2618	0.768944	1.46372	0.487938	-2.21492	0.609351	-7.7247		0.62223	-21.6831	0.622	-21.7834	0.621866	-2.98985	0	--		0.91765	-10.8661	0.713969	-0.763015	0.709573	-0.146241	0.717634	-0.467621		0.71201	-21.3246	0.20639	-3.68383	0.20619	-3.77743	0.205814	-3.9737
0.67654	-10.2797	0.813793	1.25721	0.566708	-2.21224	0.664027	-7.46946		0.67517	-21.6838	0.674899	-21.7843	0.674741	-3.12751	0	-21.5969		0.95883	-10.8995	0.754675	-0.596031	0.748344	-0.442947	0.759901	-0.444994		0.75185	-21.3244	0.246703	-3.89304	0.2466	-4.0012	0.246388	-4.21076
0.72969	-10.3046	0.858641	0.97941	0.645398	-2.2145	0.718702	-7.18395		0.72811	-21.685	0.727797	-21.7855	0.727616	-3.16779	0.0637306	-21.5971		1	-10.9106	0.795382	-0.418343	0.787115	-1.01601	0.802168	-0.0302416		0.7917	-21.3242	0.287015	-4.21324	0.28701	-4.32517	0.286962	-4.54202
0.77667	-10.2344	0.905761	1.29666	0.724089	-2.37856	0.773378	-6.95263		0.77451	-21.6839	0.774081	-21.7843	0.773832	-3.03397	0.127461	-21.5976		0	--	0.836088	-0.430151	0.825886	-1.23061	0.844435	-0.246128		0.83155	-21.324	0.327328	-4.23789	0.32742	-4.3716	0.327536	-4.63765
0.82366	-10.2274	0.95288	1.16161	0.791135	-2.33454	0.828053	-6.85816		0.82091	-21.6832	0.820365	-21.7836	0.820048	-3.02748	0.195238	-21.5974		0	-10.8768	0.877066	0	0.869415	-0.820874	0.883327	0.384714		0.87366	-21.3245	0.373636	-4.05122	0.373728	-4.16982	0.373857	-4.41351
0.87064	-10.2916	1	1.61686	0.85818	-2.11078	0.885369	-6.88772		0.86731	-21.6829	0.86665	-21.7833	0.866263	-3.01091	0.263015	-21.5984		0.04117	-10.899	0.918044	-0.171058	0.912943	-0.291518	0.922218	0.235649		0.91577	-21.3255	0.419944	-3.82455	0.420035	-3.92955	0.420179	-4.14023
0.91376	-10.2737	0	--	0.92909	-2.18384	0.942684	-6.96316		0.91154	-21.6828	0.9111	-21.7831	0.910842	-2.88472	0.330792	-21.5952		0.08235	-10.8656	0.959022	-0.758909	0.956472	-0.339094	0.961109	-0.108364		0.95789	-21.325	0.466253	-3.50365	0.466343	-3.60202	0.4665	-3.8203
0.95688	-10.2602	0	1.6235	1	-2.21224	1	-6.99806		0.95577	-21.6828	0.95555	-21.783	0.955421	-2.99293	0.410782	-21.5989		0.12352	-10.8141	1	-1.3436	1	-0.250319	1	-0.422792		1	-21.3254	0.512561	-3.50089	0.51265	-3.60401	0.512822	-3.8323
1	-10.2552	0.0471196	1.52828	0	--	0	--		1	-21.6828	1	-21.783	1	-3.11629	0.490773	-21.5974		0.1647	-10.7515	0	--	0	--	0	--		0	--	0.55887	-3.65534	0.558958	-3.77365	0.559143	-4.00289
0	--	0.0942392	1.4146	0	-2.17576	0	-6.83775		0	--	0	--	0	--	0.570763	-21.5969		0.20544	-10.8681	0	0.944294	0	-0.0573624	0	0.183448		0	-21.3249	0.597421	-3.53919	0.597509	-3.63638	0.597706	-3.83824
0	-10.2552	0.141359	0.979585	0.0709098	-2.14801	0.0546755	-6.96681		0	-21.6828	0	-21.7829	0	-2.96534	0.650673	-21.5974		0.24617	-11.0007	0.040978	0.537345	0.0435284	0.13307	0.0388911	-0.104073		0.04211	-21.3248	0.635973	-3.5271	0.63606	-3.63086	0.636269	-3.8476
0.04312	-10.2602	0.188659	1.4229	0.14182	-2.07707	0.109351	-6.87801		0.04423	-21.6827	0.0444501	-21.783	0.0445789	-2.85666	0.730584	-21.5989		0.28691	-11.1355	0.081956	0.542752	0.0870568	-0.125486	0.0777823	0.239114		0.08423	-21.3245	0.674525	-3.58944	0.674611	-3.6802	0.674831	-3.91569
0.08624	-10.2736	0.235958	1.70607	0.236109	-1.93982	0.164027	-6.78658		0.08846	-21.6828	0.0889002	-21.7831	0.0891577	-2.88408	0.801561	-21.5974		0.32765	-11.2607	0.122934	0.796078	0.130585	0.494299	0.116673	1.16553		0.12634	-21.3244	0.713076	-3.79364	0.713162	-3.90126	0.713394	-4.14523
0.12936	-10.2915	0.283258	2.20627	0.330399	-2.1012	0.218702	-7.14364		0.13269	-21.6829	0.13335	-21.7833	0.133737	-3.01088	0.872539	-21.5976		0.37398	-11.0654	0.163912	1.34083	0.174114	1.35107	0.155565	2.04638		0.16845	-21.3239	0.753358	-3.79898	0.753515	-3.89766	0.753849	-4.10589
0.17972	-10.2207	0.330558	2.07896	0.409169	-2.13434	0.273378	-7.36694		0.18222	-21.6833	0.182718	-21.7837	0.183007	-2.96634	0.936269	-21.5971		0.42032	-10.8762	0.204886	0.883936	0.211924	0.588196	0.198981	1.44077		0.22124	-21.3239	0.793641	-3.50337	0.793867	-3.58986	0.794304	-3.77675
0.23009	-10.216	0.389612	2.03655	0.487938	-2.14545	0.328053	-7.44299		0.23176	-21.6842	0.232086	-21.7846	0.232277	-3.15792	1	-21.5969		0.46666	-10.7174	0.245861	1.2736	0.249735	0.279066	0.242397	1.1684		0.27403	-21.3238	0.833923	-3.95067	0.83422	-4.06812	0.834759	-4.29967
0.28045	-10.2651	0.448667	2.07813	0.566708	-2.17576	0.385369	-7.53808		0.28129	-21.6856	0.281454	-21.7859	0.281547	-3.0706	0	--		0.51299	-10.8058	0.286835	1.05898	0.287546	0.52875	0.285813	0.783125		0.32682	-21.3236	0.875442	-3.49723	0.875665	-3.58554	0.87607	-3.7787
0.33082	-10.344	0.507721	1.5785	0.645398	-2.14545	0.442684	-7.73339		0.33083	-21.6871	0.330822	-21.7873	0.330817	-3.14553	0	-21.5967		0.55933	-10.8768	0.32781	0.875961	0.325357	0.627378	0.329229	0.77422		0.37306	-21.3238	0.916961	-3.71003	0.91711	-3.79711	0.91738	-4.00757
0.3787	-10.2449	0.566775	1.6235	0.724089	-2.1344	0.5	-7.92692		0.37852	-21.6858	0.378478	-21.7862	0.378452	-3.14638	0.0637306	-21.5964		0.61076	-10.7951	0.366441	0.850363	0.363794	0.3101	0.368085	0.539361		0.4193	-21.3243	0.958481	-3.74353	0.958555	-3.84953	0.95869	-4.0522
0.42658	-10.1875	0.619216	1.54226	0.791135	-1.9253	0.554676	-7.8324		0.42621	-21.6846	0.426134	-21.785	0.426087	-3.06845	0.127461	-21.5965		0.6622	-10.7479	0.405072	0.801316	0.402231	0.0500904	0.406941	0.350556		0.46554	-21.3251	1	-3.65534	1	-3.77365	1	-4.00289
0.47447	-10.1824	0.671656	1.9489	0.85818	-2.07707	0.609351	-7.61722		0.47391	-21.6836	0.47379	-21.7839	0.473722	-2.98249	0.195238	-21.5973		0.71363	-10.9365	0.443704	0.79504	0.440668	-0.015711	0.445797	0.230074		0.51178	-21.3249	0	--	0	--	0	--
0.52235	-10.2314	0.724096	2.13189	0.92909	-2.14801	0.664027	-7.32022		0.5216	-21.683	0.521446	-21.7832	0.521357	-2.9664	0.263015	-21.5982		0.75419	-10.8816	0.482335	0.840656	0.479105	0.180045	0.484653	0.143257		0.55802	-21.3249	0	-3.65318	0	-3.7734	0	-4.00073
0.57023	-10.2552	0.768944	1.69266	1	-2.17576	0.718702	-7.02162		0.56929	-21.6828	0.569102	-21.7829	0.568992	-2.96534	0.330792	-21.5944		0.79475	-10.8171	0.520967	0.515072	0.517542	-0.182741	0.523509	0.0219405		0.60935	-21.3249	0.0415193	-3.51267	0.0414449	-3.62695	0.0413101	-3.85548
0.62338	-10.2236	0.813793	1.50682	0	--	0.773378	-6.84384		0.62223	-21.683	0.622	-21.7833	0.621866	-2.93459	0.410782	-21.5983		0.8353	-10.7515	0.559598	0.944294	0.555979	-0.0573624	0.562365	0.183448		0.66068	-21.3252	0.0830387	-3.4664	0.0828899	-3.57036	0.0826203	-3.78226
0.67654	-10.1788	0.858641	0.979585	0	-2.14851	0.828053	-6.83485		0.67517	-21.6838	0.674899	-21.7842	0.674741	-3.02917	0.490773	-21.5971		0.87648	-10.8141	0.598191	0.515347	0.594377	-0.182927	0.601182	0.0216728		0.71201	-21.3241	0.124558	-3.43595	0.124335	-3.53641	0.12393	-3.75909
0.72969	-10.201	0.905761	1.4146	0.0709098	-2.03103	0.885369	-6.85416		0.72811	-21.685	0.727797	-21.7853	0.727616	-3.14863	0.570763	-21.5967		0.91765	-10.8656	0.636783	0.83907	0.632776	0.180951	0.64	0.142932		0.75185	-21.3239	0.166077	-3.1679	0.16578	-3.24188	0.165241	-3.43114
0.77667	-10.1947	0.95288	1.52828	0.14182	-2.07705	0.942684	-6.83149		0.77451	-21.6839	0.774081	-21.7842	0.773832	-3.03385	0.650673	-21.5971		0.95883	-10.899	0.675376	0.795129	0.671174	-0.0154332	0.678817	0.229809		0.7917	-21.3238	0.20639	-3.49408	0.20619	-3.57718	0.205814	-3.77291
0.82366	-10.2239	1	1.6235	0.236109	-1.93187	1	-6.83775		0.82091	-21.6832	0.820365	-21.7835	0.820048	-2.93113	0.730584	-21.5983		1	-10.8768	0.713969	0.801171	0.709573	0.0491944	0.717634	0.349936		0.83155	-21.3239	0.246703	-3.61546	0.2466	-3.71233	0.246388	-3.92945
0.87064	-10.2915	0	--	0.330399	-2.1012	0	--		0.86731	-21.6829	0.86665	-21.7833	0.866263	-3.01088	0.801561	-21.5971		0	--	0.754675	0.946616	0.748344	0.0678285	0.759901	0.442694		0.87366	-21.3244	0.287015	-3.99329	0.28701	-4.11206	0.286962	-4.35675
0.91376	-10.2736	0	1.71902	0.409169	-2.11638	0	-6.83269		0.91154	-21.6828	0.9111	-21.7831	0.910842	-2.88408	0.872539	-21.5965		0	-10.8762	0.795382	0.827221	0.787115	0.302723	0.802168	1.26425		0.91577	-21.3245	0.327328	-4.21828	0.32742	-4.36382	0.327536	-4.62961
0.95688	-10.2602	0.0471196	1.53442	0.487938	-2.02134	0.0546755	-6.87807		0.95577	-21.6827	0.95555	-21.783	0.955421	-2.85666	0.936269	-21.5964		0.04117	-10.7562	0.836088	1.34083	0.825886	1.35107	0.844435	2.04638		0.95789	-21.3248	0.373636	-4.03224	0.373728	-4.16046	0.373857	-4.40205
1	-10.2552	0.0942392	1.42966	0.566708	-2.14851	0.109351	-6.80219		1	-21.6828	1	-21.7829	1	-2.96534	1	-21.5967		0.08235	-10.7236	0.877066	0.796078	0.869415	0.494299	0.883327	1.16553		1	-21.3249	0.419944	-3.68508	0.420035	-3.80535	0.420179	-4.04844
0	--	0.141359	1.98977	0.645398	-2.02129	0.164027	-6.78589		0	--	0	--	0	--	0	--		0.12352	-10.692	0.918044	0.542752	0.912943	-0.125486	0.922218	0.239114		0	--	0.466253	-3.4674	0.466343	-3.57923	0.4665	-3.80824
0	-6.85972	0.188659	1.81788	0.724089	-2.1157	0.218702	-7.14296		0	-21.6771	0	-21.7772	0	-2.78522	0	-21.5964		0.1647	-10.751	0.959022	0.537345	0.956472	0.13307	0.961109	-0.104073		0	-21.3243	0.512561	-3.48828	0.51265	-3.59539	0.512822	-3.79401
0.04312	-6.83029	0.235958	1.92892	0.791135	-1.90218	0.273378	-7.3663		0.04423	-21.6771	0.0444501	-21.7777	0.0445789	-2.79501	0.0637306	-21.5963		0.20544	-10.6624	1	0.944294	1	-0.0573624	1	0.183448		0.04211	-21.3247	0.55887	-3.65318	0.558958	-3.7734	0.559143	-4.00073
0.08624	-6.74746	0.283258	2.22086	0.85818	-2.07705	0.328053	-7.44236		0.08846	-21.6771	0.0889002	-21.778	0.0891577	-2.84295	0.127461	-21.5964		0.24617	-10.6395	0	--	0	--	0	--		0.08423	-21.3244	0.597421	-3.48914	0.597509	-3.60539	0.597706	-3.83492
0.12936	-6.62775	0.330558	2.08122	0.92909	-2.03103	0.385369	-7.53724		0.13269	-21.6771	0.13335	-21.778	0.133737	-3.01021	0.195238	-21.5971		0.28691	-10.6159	0	0.945143	0	0.0401703	0	0.185452		0.12634	-21.3238	0.635973	-3.42098	0.63606	-3.52972	0.636269	-3.75487
0.17972	-6.68123	0.389612	2.17268	1	-2.14851	0.442684	-7.73238		0.18222	-21.6769	0.182718	-21.7777	0.183007	-2.83502	0.263015	-21.5981		0.32765	-10.5953	0.040978	0.540161	0.0435284	0.414114	0.0388911	0.157661		0.16845	-21.3235	0.674525	-3.56313	0.674611	-3.6385	0.674831	-3.83598
0.23009	-6.65976	0.448667	2.14862	0	--	0.5	-7.92551		0.23176	-21.6764	0.232086	-21.7771	0.232277	-2.95524	0.330792	-21.5944		0.37398	-10.6325	0.081956	0.773172	0.0870568	0.0676312	0.0777823	0.656409		0.22124	-21.3234	0.713076	-3.77698	0.713162	-3.89984	0.713394	-4.1245
0.28045	-6.5949	0.507721	1.84577	0	-2.00089	0.554676	-7.83095		0.28129	-21.6757	0.281454	-21.7763	0.281547	-3.03517	0.410782	-21.5978		0.42032	-10.6763	0.122934	0.814204	0.130585	0.528838	0.116673	1.1705		0.27403	-21.3234	0.753358	-3.74052	0.753515	-3.83973	0.753849	-4.04397
0.33082	-6.5278	0.566775	1.71902	0.0709098	-2.0016	0.609351	-7.6152		0.33083	-21.6751	0.330822	-21.7755	0.330817	-3.05848	0.490773	-21.5962		0.46666	-10.717	0.163912	1.34109	0.174114	1.35134	0.155565	2.04999		0.32682	-21.3236	0.793641	-3.48718	0.793867	-3.56918	0.794304	-3.76134
0.3787	-6.61289	0.619216	1.82902	0.14182	-1.55818	0.664027	-7.31746		0.37852	-21.6756	0.378478	-21.7763	0.378452	-3.02473	0.570763	-21.5964		0.51299	-10.7711	0.204886	0.885589	0.211924	0.591624	0.198981	1.44699		0.37306	-21.3235	0.833923	-3.1679	0.83422	-3.24188	0.834759	-3.43114
0.42658	-6.70272	0.671656	2.01384	0.236109	-1.71055	0.718702	-7.0179		0.42621	-21.6761	0.426134	-21.7769	0.426087	-3.01593	0.650673	-21.5962		0.55933	-10.8762	0.245861	1.27428	0.249735	0.280665	0.242397	1.17347		0.4193	-21.3242	0.875442	-3.43595	0.875665	-3.53641	0.87607	-3.75909
0.47447	-6.78338	0.724096	2.26372	0.330399	-2.09058	0.773378	-6.83936		0.47391	-21.6766	0.47379	-21.7773	0.473722	-2.97551	0.730584	-21.5978		0.61076	-10.7605	0.286835	1.06083	0.287546	0.531891	0.285813	0.785151		0.46554	-21.3247	0.916961	-3.4664	0.91711	-3.57036	0.91738	-3.78226
0.52235	-6.83957	0.768944	2.09934	0.409169	-1.99454	0.828053	-6.8343		0.5216	-21.677	0.521446	-21.7774	0.521357	-2.92844	0.801561	-21.5969		0.6622	-10.7088	0.32781	0.875999	0.325357	0.627655	0.329229	0.774916		0.51178	-21.3246	0.958481	-3.51267	0.958555	-3.62695	0.95869	-3.85548
0.57023	-6.85972	0.813793	1.5778	0.487938	-2.00657	0.885369	-6.82191		0.56929	-21.6771	0.569102	-21.7772	0.568992	-2.78522	0.872539	-21.5964		0.71363	-10.6617	0.366441	0.850992	0.363794	0.762699	0.368085	1.00791		0.55802	-21.3243	1	-3.65318	1	-3.7734	1	-4.00073
0.62338	-6.835	0.858641	1.98977	0.566708	-2.00089	0.942684	-6.82646		0.62223	-21.6769	0.622	-21.7774	0.621866	-2.92002	0.936269	-21.5963		0.75419	-10.6685	0.405072	0.802408	0.402231	0.879335	0.406941	0.97288		0.60935	-21.3247	0	--	0	--	0	--
0.67654	-6.76722	0.905761	1.42966	0.645398	-2.0076	1	-6.83269		0.67517	-21.6765	0.674899	-21.7773	0.674741	-2.97753	1	-21.5964		0.79475	-10.6936	0.443704	0.796277	0.440668	1.09102	0.445797	1.16366		0.66068	-21.3246	0	-3.48542	0	-3.60985	0	-3.85658
0.72969	-6.67333	0.95288	1.53442	0.724089	-1.99609	0	--		0.72811	-21.6759	0.727797	-21.7767	0.727616	-2.97406	0	--		0.8353	-10.751	0.482335	0.842172	0.479105	0.383503	0.484653	0.432519		0.71201	-21.3239	0.0415193	-3.31601	0.0414449	-3.42345	0.0413101	-3.65311
0.77667	-6.72349	1	1.71902	0.791135	-1.88655	0	-6.80721		0.77451	-21.6765	0.774081	-21.7774	0.773832	-3.00579	0	-21.5953		0.87648	-10.692	0.520967	0.51607	0.517542	0.476573	0.523509	0.216354		0.75185	-21.3238	0.0830387	-3.09819	0.0828899	-3.19765	0.0826203	-3.41265
0.82366	-6.71492	0	--	0.85818	-1.55818	0.0546755	-6.70811		0.82091	-21.6769	0.820365	-21.7778	0.820048	-2.92946	0.0637306	-21.5958		0.91765	-10.7236	0.559598	0.945143	0.555979	0.0401703	0.562365	0.185452		0.7917	-21.3236	0.124558	-3.43056	0.124335	-3.52874	0.12393	-3.74734
0.87064	-6.62775	0	1.76596	0.92909	-2.0016	0.109351	-6.69488		0.86731	-21.6771	0.86665	-21.778	0.866263	-3.01021	0.127461	-21.596		0.95883	-10.7562	0.598191	0.516343	0.594377	0.476369	0.601182	0.216339		0.83155	-21.3235	0.166077	-3.14526	0.16578	-3.24131	0.165241	-3.43038
0.91376	-6.74746	0.0471196	1.79016	1	-2.00089	0.164027	-6.73431		0.91154	-21.6771	0.9111	-21.778	0.910842	-2.84295	0.195238	-21.5967		1	-10.8762	0.636783	0.840586	0.632776	0.381768	0.64	0.431142		0.87366	-21.3238	0.20639	-3.47652	0.20619	-3.57691	0.205814	-3.77275
0.95688	-6.83029	0.0942392	1.75452	0	--	0.218702	-6.55297		0.95577	-21.6771	0.95555	-21.7777	0.955421	-2.79501	0.263015	-21.597		0	--	0.675376	0.796363	0.671174	1.08967	0.678817	1.16192		0.91577	-21.3244	0.246703	-3.59696	0.2466	-3.71147	0.246388	-3.9286
1	-6.85972	0.141359	1.98981	0	-1.97649	0.273378	-6.36894		1	-21.6771	1	-21.7772	1	-2.78522	0.330792	-21.5943		0	-10.7555	0.713969	0.802263	0.709573	0.881618	0.717634	0.973395		0.95789	-21.3247	0.287015	-3.97715	0.28701	-4.11147	0.286962	-4.35627
0	--	0.188659	1.82034	0.0709098	-1.69135	0.328053	-6.27831		0	--	0	--	0	--	0.410782	-21.5966		0.04117	-10.747	0.754675	1.01256	0.748344	0.884928	0.759901	1.28732		1	-21.3243	0.327328	-4.21742	0.32742	-4.36342	0.327536	-4.62797
0	-6.85969	0.235958	1.93404	0.14182	-1.55817	0.385369	-6.1387		0	-21.6763	0	-21.7772	0	-2.78434	0.490773	-21.596		0.08235	-10.6819	0.795382	1.07653	0.787115	1.07202	0.802168	1.40003		0	--	0.373636	-3.95816	0.373728	-4.08918	0.373857	-4.34264
0.04312	-6.83027	0.283258	2.22147	0.236109	-1.70214	0.442684	-5.80686		0.04423	-21.6764	0.0444501	-21.7774	0.0445789	-2.79415	0.570763	-21.5953		0.12352	-10.6855	0.836088	1.34109	0.825886	1.35134	0.844435	2.04999		0	-21.3233	0.419944	-3.65167	0.420035	-3.75514	0.420179	-3.97492
0.08624	-6.74741	0.330558	2.08139	0.330399	-2.09058	0.5	-5.37918		0.08846	-21.6768	0.0889002	-21.7777	0.0891577	-2.8427	0.650673	-21.596		0.1647	-10.751	0.877066	0.814204	0.869415	0.528838	0.883327	1.1705		0.04211	-21.3233	0.466253	-3.39842	0.466343	-3.49179	0.4665	-3.68765
0.12936	-6.62774	0.389612	2.29083	0.409169	-1.91993	0.554676	-5.55639		0.13269	-21.677	0.13335	-21.778	0.133737	-3.01019	0.730584	-21.5966		0.20544	-10.6624	0.918044	0.773172	0.912943	0.0676312	0.922218	0.656409		0.08423	-21.3232	0.512561	-3.39334	0.51265	-3.50425	0.512822	-3.72365
0.17972	-6.68122	0.448667	2.17271	0.487938	-1.88911	0.609351	-5.70369		0.18222	-21.6769	0.182718	-21.7777	0.183007	-2.835	0.801561	-21.5967		0.24617	-10.6395	0.959022	0.540161	0.956472	0.414114	0.961109	0.157661		0.12634	-21.3234	0.55887	-3.48542	0.558958	-3.60985	0.559143	-3.85658
0.23009	-6.65974	0.507721	2.11075	0.566708	-1.97649	0.664027	-5.77081		0.23176	-21.6764	0.232086	-21.7771	0.232277	-2.95519	0.872539	-21.596		0.28691	-10.6159	1	0.945143	1	0.0401703	1	0.185452		0.16845	-21.3234	0.597421	-3.43201	0.597509	-3.54528	0.597706	-3.76626
0.28045	-6.59489	0.566775	1.76596	0.645398	-1.88923	0.718702	-6.23454		0.28129	-21.6757	0.281454	-21.7763	0.281547	-3.03512	0.936269	-21.5958		0.32765	-10.5952	0	--	0	--	0	--		0.22124	-21.3233	0.635973	-3.39547	0.63606	-3.48821	0.636269	-3.68376
0.33082	-6.52777	0.619216	2.06063	0.724089	-1.91827	0.773378	-6.77025		0.33083	-21.6751	0.330822	-21.7755	0.330817	-3.05841	1	-21.5953		0.37398	-10.6125	0	0.947761	0	0.921561	0	1.01807		0.27403	-21.3234	0.674525	-3.53299	0.674611	-3.63477	0.674831	-3.80337
0.3787	-6.53578	0.671656	2.30458	0.791135	-1.40438	0.828053	-6.83101		0.37852	-21.6756	0.378478	-21.776	0.378452	-2.95795	0	--		0.42032	-10.6525	0.040978	0.61368	0.0435284	1.05007	0.0388911	1.42802		0.32682	-21.3235	0.713076	-3.77343	0.713162	-3.89653	0.713394	-4.11955
0.42658	-6.53023	0.724096	2.26443	0.85818	-1.55817	0.885369	-6.81697		0.42621	-21.6759	0.426134	-21.7764	0.426087	-3.00924	0	-21.5952		0.46666	-10.7166	0.081956	0.776318	0.0870568	1.65081	0.0777823	1.35798		0.37306	-21.3232	0.753358	-3.56117	0.753515	-3.66749	0.753849	-3.88779
0.47447	-6.65409	0.768944	2.10416	0.92909	-1.69135	0.942684	-6.42782		0.47391	-21.6761	0.47379	-21.7768	0.473722	-2.86421	0.0637306	-21.5955		0.51299	-10.7454	0.122934	1.70683	0.130585	2.26145	0.116673	1.60904		0.4193	-21.3232	0.793641	-3.40574	0.793867	-3.50099	0.794304	-3.71086
0.52235	-6.80478	0.813793	1.99332	1	-1.97649	1	-6.80721		0.5216	-21.6761	0.521446	-21.7771	0.521357	-2.80341	0.127461	-21.5959		0.55933	-10.7555	0.163912	1.4414	0.174114	1.43933	0.155565	2.18622		0.46554	-21.3231	0.833923	-3.14526	0.83422	-3.24131	0.834759	-3.43038
0.57023	-6.85969	0.858641	1.98981	0	--	0	--		0.56929	-21.6763	0.569102	-21.7772	0.568992	-2.78434	0.195238	-21.5966		0.61076	-10.743	0.204886	2.11425	0.211924	2.30174	0.198981	1.67192		0.51178	-21.3232	0.875442	-3.43056	0.875665	-3.52874	0.87607	-3.74734
0.62338	-6.79239	0.905761	1.75452	0	-0.80615	0	-5.90622		0.62223	-21.6761	0.622	-21.7771	0.621866	-2.83274	0.263015	-21.597		0.6622	-10.701	0.245861	1.59226	0.249735	2.02083	0.242397	1.34866		0.55802	-21.3233	0.916961	-3.09819	0.91711	-3.19765	0.91738	-3.41265
0.67654	-6.61124	0.95288	1.79016	0.0709098	-0.72016	0.0546755	-6.23483		0.67517	-21.6761	0.674899	-21.7767	0.674741	-2.87433	0.330792	-21.5943		0.71363	-10.6366	0.286835	1.32044	0.287546	1.27127	0.285813	1.2649		0.60935	-21.3232	0.958481	-3.31601	0.958555	-3.42345	0.95869	-3.65311
0.72969	-6.53406	1	1.76596	0.14182	-0.557828	0.109351	-6.3108		0.72811	-21.6758	0.727797	-21.7763	0.727616	-2.96481	0.410782	-21.5958		0.75419	-10.6535	0.32781	0.8785	0.325357	0.630076	0.329229	0.779491		0.66068	-21.3231	1	-3.48542	1	-3.60985	1	-3.85658
0.77667	-6.60506	0	--	0.236109	-1.63857	0.164027	-6.73352		0.77451	-21.6764	0.774081	-21.7771	0.773832	-2.99595	0.490773	-21.5953		0.79475	-10.6698	0.366441	1.29633	0.363794	0.959658	0.368085	1.14762		0.71201	-21.3232	0	--	0	--	0	--
0.82366	-6.64167	0	1.78993	0.330399	-1.28254	0.218702	-6.55254		0.82091	-21.6768	0.820365	-21.7777	0.820048	-2.77811	0.570763	-21.5952		0.8353	-10.751	0.405072	1.12118	0.402231	1.24471	0.406941	1.18734		0.75185	-21.3234	0	-3.42997	0	-3.54426	0	-3.77804
0.87064	-6.62774	0.0471196	2.37976	0.409169	-1.80426	0.273378	-6.36842		0.86731	-21.677	0.86665	-21.778	0.866263	-3.01019	0.650673	-21.5953		0.87648	-10.6855	0.443704	1.34274	0.440668	1.45325	0.445797	1.31843		0.7917	-21.3234	0.0415193	-3.30228	0.0414449	-3.41831	0.0413101	-3.64079
0.91376	-6.74741	0.0942392	1.86431	0.487938	-1.5409	0.328053	-6.27775		0.91154	-21.6768	0.9111	-21.7777	0.910842	-2.8427	0.730584	-21.5958		0.91765	-10.6819	0.482335	0.860998	0.479105	1.15405	0.484653	1.27745		0.83155	-21.3234	0.0830387	-3.0046	0.0828899	-3.1049	0.0826203	-3.30846
0.95688	-6.83027	0.141359	2.19009	0.566708	-0.80615	0.385369	-6.13797		0.95577	-21.6764	0.95555	-21.7774	0.955421	-2.79415	0.801561	-21.5965		0.95883	-10.747	0.520967	0.974667	0.517542	0.954301	0.523509	1.03932		0.87366	-21.3234	0.124558	-3.34204	0.124335	-3.4371	0.12393	-3.63759
1	-6.85969	0.188659	2.05344	0.645398	-1.5402	0.442684	-5.806		1	-21.6763	1	-21.7772	1	-2.78434	0.872539	-21.5959		1	-10.7555	0.559598	0.947761	0.555979	0.921561	0.562365	1.01807		0.91577	-21.3232	0.166077	-3.06603	0.16578	-3.15228	0.165241	-3.35176
0	--	0.235958	2.24263	0.724089	-1.80392	0.5	-5.37822		0	--	0	--	0	--	0.936269	-21.5955		0	--	0.598191	0.974775	0.594377	0.954185	0.601182	1.03917		0.95789	-21.3233	0.20639	-3.26706	0.20619	-3.36183	0.205814	-3.56965
0	-6.35706	0.283258	2.41971	0.791135	-1.369	0.554676	-5.55555		0	-21.6759	0	-21.7771	0	-2.66156	1	-21.5952		0	-10.5722	0.636783	0.861196	0.632776	1.15342	0.64	1.27677		1	-21.3233	0.246703	-3.3626	0.2466	-3.43018	0.246388	-3.66263
0.04312	-6.41852	0.330558	2.74047	0.85818	-0.557828	0.609351	-5.703		0.04423	-21.6763	0.0444501	-21.7767	0.0445789	-2.64305	0	--		0.04117	-10.5867	0.675376	1.34508	0.671174	1.4538	0.678817	1.31881		0	--	0.287015	-3.25681	0.28701	-3.32745	0.286962	-3.54421
0.08624	-6.49852	0.389612	2.36467	0.92909	-0.72016	0.664027	-5.77007		0.08846	-21.6763	0.0889002	-21.7768	0.0891577	-2.75722	0	-21.5784		0.08235	-10.6271	0.713969	1.11958	0.709573	1.24569	0.717634	1.18793		0	-21.3229	0.327328	-3.11917	0.32742	-3.14374	0.327536	-3.29678
0.12936	-6.62768	0.448667	2.48327	1	-0.80615	0.718702	-5.77199		0.13269	-21.6762	0.13335	-21.7768	0.133737	-2.49943	0.0637306	-21.5781		0.12352	-10.685	0.754675	1.45879	0.748344	1.47685	0.759901	1.61021		0.04211	-21.323	0.373636	-3.40604	0.373728	-3.49373	0.373857	-3.69146
0.17972	-6.49732	0.507721	2.33869	0	--	0.773378	-6.44071		0.18222	-21.6761	0.182718	-21.7766	0.183007	-2.71565	0.127461	-21.5775		0.1647	-10.6638	0.795382	1.79357	0.787115	1.80718	0.802168	1.67799		0.08423	-21.3231	0.419944	-3.60911	0.420035	-3.72	0.420179	-3.9363
0.23009	-6.46479	0.566775	1.78993	0	-0.795902	0.828053	-6.82935		0.23176	-21.6756	0.232086	-21.776	0.232277	-2.75164	0.195238	-21.58		0.20544	-10.6573	0.836088	1.4414	0.825886	1.43933	0.844435	2.18622		0.12634	-21.3232	0.466253	-3.36034	0.466343	-3.459	0.4665	-3.64761
0.28045	-6.48377	0.619216	2.28173	0.0709098	-0.686004	0.885369	-6.60034		0.28129	-21.675	0.281454	-21.7752	0.281547	-2.96004	0.263015	-21.5867		0.24617	-10.6086	0.877066	1.70683	0.869415	2.26145	0.883327	1.60904		0.16845	-21.323	0.512561	-3.37479	0.51265	-3.48667	0.512822	-3.71737
0.33082	-6.52776	0.671656	2.4125	0.14182	-0.557817	0.942684	-6.27943		0.33083	-21.675	0.330822	-21.7755	0.330817	-3.05838	0.330792	-21.5939		0.28691	-10.5889	0.918044	0.776318	0.912943	1.65081	0.922218	1.35798		0.22124	-21.3228	0.55887	-3.42997	0.558958	-3.54426	0.559143	-3.77804
0.3787	-6.51057	0.724096	2.43364	0.236109	-1.61423	1	-5.90622		0.37852	-21.6749	0.378478	-21.7752	0.378452	-2.93134	0.410782	-21.5872		0.32765	-10.5952	0.959022	0.61368	0.956472	1.05007	0.961109	1.42802		0.27403	-21.3222	0.597421	-3.37868	0.597509	-3.49161	0.597706	-3.7249
0.42658	-6.48311	0.768944	2.14941	0.330399	-1.28253	0	--		0.42621	-21.6753	0.426134	-21.7758	0.426087	-2.87961	0.490773	-21.5808		0.37398	-10.6001	1	0.947761	1	0.921561	1	1.01807		0.32682	-21.3213	0.635973	-3.29459	0.63606	-3.40223	0.636269	-3.6116
0.47447	-6.50218	0.813793	2.09217	0.409169	-1.24541	0	-5.90467		0.47391	-21.6758	0.47379	-21.7763	0.473722	-2.82393	0.570763	-21.5784		0.42032	-10.6293	0	--	0	--	0	--		0.37306	-21.3227	0.674525	-3.44473	0.674611	-3.54204	0.674831	-3.75835
0.52235	-6.44424	0.858641	2.19009	0.487938	-0.899477	0.0546755	-6.02769		0.5216	-21.6761	0.521446	-21.7766	0.521357	-2.7925	0.650673	-21.5808		0.46666	-10.6863	0	0.947931	0	0.926529	0	1.02524		0.4193	-21.323	0.713076	-3.7554	0.713162	-3.87291	0.713394	-4.0937
0.57023	-6.35706	0.905761	1.86431	0.566708	-0.795902	0.109351	-6.30989		0.56929	-21.6759	0.569102	-21.7771	0.568992	-2.66156	0.730584	-21.5872		0.51299	-10.6096	0.040978	1.24326	0.0435284	1.33895	0.0388911	1.53564		0.46554	-21.323	0.753358	-3.533	0.753515	-3.59678	0.753849	-3.7729
0.62338	-6.45215	0.95288	2.37976	0.645398	-0.898599	0.164027	-6.51192		0.62223	-21.6761	0.622	-21.7766	0.621866	-2.80128	0.801561	-21.5802		0.55933	-10.5722	0.081956	0.799312	0.0870568	1.79927	0.0777823	1.4003		0.51178	-21.3229	0.793641	-3.36903	0.793867	-3.45906	0.794304	-3.64916
0.67654	-6.51075	1	1.78993	0.724089	-1.24567	0.218702	-6.26741		0.67517	-21.6757	0.674899	-21.7762	0.674741	-2.82182	0.872539	-21.5775		0.61076	-10.6182	0.122934	1.71021	0.130585	2.3206	0.116673	1.66186		0.55802	-21.3229	0.833923	-3.06603	0.83422	-3.15228	0.834759	-3.35176
0.72969	-6.4935	0	--	0.791135	-1.22747	0.273378	-5.96511		0.72811	-21.6752	0.727797	-21.7757	0.727616	-2.93625	0.936269	-21.5781		0.6622	-10.6713	0.163912	1.4417	0.174114	1.43951	0.155565	2.19498		0.60935	-21.323	0.875442	-3.34204	0.875665	-3.4371	0.87607	-3.63759
0.77667	-6.47709	0	2.65549	0.85818	-0.557817	0.328053	-5.61477		0.77451	-21.6757	0.774081	-21.7762	0.773832	-2.96899	1	-21.5784		0.71363	-10.6168	0.204886	2.11562	0.211924	2.30445	0.198981	1.67935		0.66068	-21.323	0.916961	-3.0046	0.91711	-3.1049	0.91738	-3.30846
0.82366	-6.56404	0.0471196	2.59987	0.92909	-0.686004	0.385369	-5.71727		0.82091	-21.6761	0.820365	-21.7766	0.820048	-2.7088	0	--		0.75419	-10.6345	0.245861	1.59378	0.249735	2.02962	0.242397	1.35782		0.71201	-21.3231	0.958481	-3.30228	0.958555	-3.41831	0.95869	-3.64079
0.87064	-6.62768	0.0942392	2.16304	1	-0.795902	0.442684	-5.29159		0.86731	-21.6762	0.86665	-21.7768	0.866263	-2.49943	0	-21.5782		0.79475	-10.6512	0.286835	1.32312	0.287546	1.2729	0.285813	1.2686		0.75185	-21.3231	1	-3.42997	1	-3.54426	1	-3.77804
0.91376	-6.49852	0.141359	2.19018	0	--	0.5	-5.37721		0.91154	-21.6763	0.9111	-21.7768	0.910842	-2.75722	0.0637306	-21.578		0.8353	-10.6638	0.32781	0.878529	0.325357	0.630768	0.329229	0.779783		0.7917	-21.3233	0	--	0	--	0	--
0.95688	-6.41852	0.188659	2.05378	0	-0.778699	0.554676	-5.2791		0.95577	-21.6763	0.95555	-21.7767	0.955421	-2.64305	0.127461	-21.5773		0.87648	-10.685	0.366441	1.54447	0.363794	1.22017	0.368085	1.21988		0.83155	-21.323	0	-3.2837	0	-3.39102	0	-3.66195
1	-6.35706	0.235958	2.24328	0.0709098	-0.46444	0.609351	-5.37132		1	-21.6759	1	-21.7771	1	-2.66156	0.195238	-21.5799		0.91765	-10.6271	0.405072	1.59939	0.402231	1.44546	0.406941	1.60643		0.87366	-21.3232	0.0415193	-3.11667	0.0414449	-3.20638	0.0413101	-3.45131
0	--	0.283258	2.42391	0.14182	-0.52264	0.664027	-5.55703		0	--	0	--	0	--	0.263015	-21.5866		0.95883	-10.5867	0.443704	1.40733	0.440668	1.69936	0.445797	1.61213		0.91577	-21.3231	0.0830387	-2.94156	0.0828899	-2.97336	0.0826203	-3.14331
0	-6.35696	0.330558	2.74076	0.236109	-0.301408	0.718702	-5.70909		0	-21.6758	0	-21.7763	0	-2.62534	0.330792	-21.5939		1	-10.5722	0.482335	0.862065	0.479105	1.54673	0.484653	1.4629		0.95789	-21.323	0.124558	-2.91712	0.124335	-2.99681	0.12393	-3.17295
0.04312	-6.39638	0.389612	2.48845	0.330399	-1.26225	0.773378	-5.46966		0.04423	-21.6758	0.0444501	-21.7764	0.0445789	-2.63858	0.410782	-21.5869		0	--	0.520967	0.975399	0.517542	1.45398	0.523509	1.31662		1	-21.3229	0.166077	-3.06368	0.16578	-3.15162	0.165241	-3.35173
0.08624	-6.49845	0.448667	2.50385	0.409169	-0.773878	0.828053	-5.14014		0.08846	-21.6761	0.0889002	-21.7766	0.0891577	-2.75644	0.490773	-21.5806		0	-10.5717	0.559598	0.947931	0.555979	0.926529	0.562365	1.02524		0	--	0.20639	-3.2581	0.20619	-3.36154	0.205814	-3.56901
0.12936	-6.62767	0.507721	2.51186	0.487938	-0.693246	0.885369	-5.64317		0.13269	-21.6762	0.13335	-21.7768	0.133737	-2.49935	0.570763	-21.5782		0.04117	-10.5862	0.598191	0.975506	0.594377	1.45391	0.601182	1.31673		0	-21.3219	0.246703	-3.35155	0.2466	-3.42987	0.246388	-3.66221
0.17972	-6.4973	0.566775	2.65549	0.566708	-0.778699	0.942684	-6.25382		0.18222	-21.6761	0.182718	-21.7766	0.183007	-2.71558	0.650673	-21.5806		0.08235	-10.6266	0.636783	0.862263	0.632776	1.54648	0.64	1.46323		0.04211	-21.3215	0.287015	-3.2507	0.28701	-3.32718	0.286962	-3.54405
0.23009	-6.46477	0.619216	2.52124	0.645398	-0.693369	1	-5.90467		0.23176	-21.6756	0.232086	-21.776	0.232277	-2.75155	0.730584	-21.5868		0.12352	-10.6547	0.675376	1.40684	0.671174	1.69881	0.678817	1.61511		0.08423	-21.3206	0.327328	-3.10859	0.32742	-3.14336	0.327536	-3.29654
0.28045	-6.48376	0.671656	2.49416	0.724089	-0.773173	0	--		0.28129	-21.675	0.281454	-21.7752	0.281547	-2.95996	0.801561	-21.58		0.1647	-10.6638	0.713969	1.59851	0.709573	1.4442	0.717634	1.60496		0.12634	-21.3216	0.373636	-3.30883	0.373728	-3.37693	0.373857	-3.54285
0.33082	-6.52775	0.724096	2.49472	0.791135	-0.211323	0	-5.85461		0.33083	-21.675	0.330822	-21.7754	0.330817	-3.05832	0.872539	-21.5773		0.20544	-10.6573	0.754675	1.59577	0.748344	1.88361	0.759901	1.94184		0.16845	-21.323	0.419944	-3.51221	0.420035	-3.56426	0.420179	-3.73295
0.3787	-6.45546	0.768944	2.29834	0.85818	-0.52264	0.0546755	-5.75115		0.37852	-21.6748	0.378478	-21.7749	0.378452	-2.92389	0.936269	-21.578		0.24617	-10.6086	0.795382	1.874	0.787115	2.36926	0.802168	2.17781		0.22124	-21.3228	0.466253	-3.25571	0.466343	-3.35875	0.4665	-3.57157
0.42658	-6.4411	0.813793	2.14082	0.92909	-0.46444	0.109351	-6.02891		0.42621	-21.6753	0.426134	-21.7754	0.426087	-2.86153	1	-21.5782		0.28691	-10.5889	0.836088	1.4417	0.825886	1.43951	0.844435	2.19498		0.27403	-21.3221	0.512561	-3.24903	0.51265	-3.35543	0.512822	-3.62494
0.47447	-6.44209	0.858641	2.19018	1	-0.778699	0.164027	-5.12673		0.47391	-21.6755	0.47379	-21.7759	0.473722	-2.72117	0	--		0.32765	-10.5952	0.877066	1.71021	0.869415	2.3206	0.883327	1.66186		0.32682	-21.3213	0.55887	-3.2837	0.558958	-3.39102	0.559143	-3.66195
0.52235	-6.38516	0.905761	2.16304	0	--	0.218702	-4.86773		0.5216	-21.6756	0.521446	-21.7764	0.521357	-2.73511	0	-21.5757		0.37398	-10.5716	0.918044	0.799312	0.912943	1.79927	0.922218	1.4003		0.37306	-21.3214	0.597421	-3.25935	0.597509	-3.36608	0.597706	-3.63616
0.57023	-6.35696	0.95288	2.59987	0	-0.744884	0.273378	-5.23247		0.56929	-21.6758	0.569102	-21.7763	0.568992	-2.62534	0.0637306	-21.5765		0.42032	-10.563	0.959022	1.24326	0.956472	1.33895	0.961109	1.53564		0.4193	-21.3215	0.635973	-3.19824	0.63606	-3.30136	0.636269	-3.56547
0.62338	-6.39222	1	2.65549	0.0709098	-0.425847	0.328053	-5.61456		0.62223	-21.6756	0.622	-21.7764	0.621866	-2.76476	0.127461	-21.5773		0.46666	-10.5646	1	0.947931	1	0.926529	1	1.02524		0.46554	-21.3214	0.674525	-3.40063	0.674611	-3.50694	0.674831	-3.71976
0.67654	-6.45243	0	--	0.14182	-0.522631	0.385369	-5.17477		0.67517	-21.6755	0.674899	-21.7757	0.674741	-2.79342	0.195238	-21.5798		0.51299	-10.5696	0	--	0	--	0	--		0.51178	-21.3216	0.713076	-3.45799	0.713162	-3.51185	0.713394	-3.6803
0.72969	-6.41525	0	2.66293	0.236109	-0.289096	0.442684	-4.89995		0.72811	-21.6751	0.727797	-21.7752	0.727616	-2.8215	0.263015	-21.5865		0.55933	-10.5717	0	1.15866	0	1.41823	0	1.46982		0.55802	-21.3219	0.753358	-3.41148	0.753515	-3.51117	0.753849	-3.7174
0.77667	-6.46736	0.0471196	2.68451	0.330399	-1.26224	0.5	-5.37619		0.77451	-21.6757	0.774081	-21.776	0.773832	-2.85477	0.330792	-21.5938		0.61076	-10.5691	0.040978	1.2446	0.0435284	1.50062	0.0388911	1.54088		0.60935	-21.3215	0.793641	-3.15264	0.793867	-3.23592	0.794304	-3.42831
0.82366	-6.46895	0.0942392	2.98219	0.409169	-0.392068	0.554676	-5.27803		0.82091	-21.6761	0.820365	-21.7766	0.820048	-2.67286	0.410782	-21.586		0.6622	-10.5637	0.081956	1.48988	0.0870568	1.9658	0.0777823	1.8011		0.66068	-21.3214	0.833923	-3.06368	0.83422	-3.15162	0.834759	-3.35173
0.87064	-6.62767	0.141359	2.19432	0.487938	-0.000818246	0.609351	-5.37039		0.86731	-21.6762	0.86665	-21.7768	0.866263	-2.49935	0.490773	-21.5787		0.71363	-10.5644	0.122934	1.88101	0.130585	2.39411	0.116673	2.18002		0.71201	-21.3215	0.875442	-2.91712	0.875665	-2.99681	0.87607	-3.17295
0.91376	-6.49845	0.188659	2.61144	0.566708	-0.744884	0.664027	-5.50304		0.91154	-21.6761	0.9111	-21.7766	0.910842	-2.75644	0.570763	-21.5757		0.75419	-10.5859	0.163912	2.38052	0.174114	2.79016	0.155565	2.20081		0.75185	-21.3214	0.916961	-2.94156	0.91711	-2.97336	0.91738	-3.14331
0.95688	-6.39638	0.235958	2.77684	0.645398	-0.00140547	0.718702	-5.70786		0.95577	-21.6758	0.95555	-21.7764	0.955421	-2.63858	0.650673	-21.5787		0.79475	-10.648	0.204886	2.19186	0.211924	2.62843	0.198981	2.32718		0.7917	-21.3223	0.958481	-3.11667	0.958555	-3.20638	0.95869	-3.45131
1	-6.35696	0.283258	2.55516	0.724089	-0.390075	0.773378	-5.46792		1	-21.6758	1	-21.7763	1	-2.62534	0.730584	-21.586		0.8353	-10.6638	0.245861	1.9744	0.249735	2.23381	0.242397	2.21254		0.83155	-21.323	1	-3.2837	1	-3.39102	1	-3.66195
0	--	0.330558	2.7429	0.791135	0	0.828053	-5.1385		0	--	0	--	0	--	0.801561	-21.5796		0.87648	-10.6547	0.286835	1.97815	0.287546	1.68702	0.285813	1.96114		0.87366	-21.3216	0	--	0	--	0	--
0	-6.31609	0.389612	2.58668	0.85818	-0.522631	0.885369	-5.32207		0	-21.6753	0	-21.7763	0	-2.62514	0.872539	-21.5773		0.91765	-10.6266	0.32781	2.13833	0.325357	1.98244	0.329229	2.15694		0.91577	-21.3206	0	-3.27986	0	-3.39081	0	-3.6618
0.04312	-6.39628	0.448667	2.71879	0.92909	-0.425847	0.942684	-5.49478		0.04423	-21.675	0.0444501	-21.7763	0.0445789	-2.63832	0.936269	-21.5765		0.95883	-10.5862	0.366441	1.82878	0.363794	1.7381	0.368085	1.81943		0.95789	-21.3215	0.0415193	-3.11303	0.0414449	-3.20212	0.0413101	-3.4433
0.08624	-6.4676	0.507721	2.71663	1	-0.744884	1	-5.85461		0.08846	-21.6741	0.0889002	-21.7755	0.0891577	-2.5884	1	-21.5757		1	-10.5717	0.405072	2.29956	0.402231	1.90121	0.406941	1.94794		1	-21.3219	0.0830387	-2.89641	0.0828899	-2.96465	0.0826203	-3.13141
0.12936	-6.46014	0.566775	2.66293	0	--	0	--		0.13269	-21.6733	0.13335	-21.7744	0.133737	-2.37883	0	--		0	--	0.443704	1.73777	0.440668	1.78002	0.445797	1.74485		0	--	0.124558	-2.89149	0.124335	-2.97812	0.12393	-3.17136
0.17972	-6.46033	0.619216	2.76708	0	0.349633	0	-5.32085		0.18222	-21.6734	0.182718	-21.7743	0.183007	-2.53985	0	-21.5755		0	-7.16011	0.482335	1.26951	0.479105	1.62967	0.484653	1.60149		0	-21.3213	0.166077	-3.06072	0.16578	-3.14128	0.165241	-3.33377
0.23009	-6.31717	0.671656	2.6774	0.0709098	0.259459	0.0546755	-5.75014		0.23176	-21.6739	0.232086	-21.7739	0.232277	-2.70007	0.0637306	-21.5763		0.04117	-7.2398	0.520967	1.18663	0.517542	1.48876	0.523509	1.51129		0.04211	-21.3211	0.20639	-3.15756	0.20619	-3.23477	0.205814	-3.42732
0.28045	-6.12873	0.724096	2.57835	0.14182	0.739393	0.109351	-5.63068		0.28129	-21.6744	0.281454	-21.7746	0.281547	-2.93627	0.127461	-21.5772		0.08235	-7.20949	0.559598	1.15866	0.555979	1.41823	0.562365	1.46982		0.08423	-21.3206	0.246703	-3.30595	0.2466	-3.3901	0.246388	-3.52162
0.33082	-5.96975	0.768944	2.49883	0.236109	0.690287	0.164027	-4.92416		0.33083	-21.6744	0.330822	-21.7744	0.330817	-2.84375	0.195238	-21.5797		0.12352	-7.07462	0.598191	1.18657	0.594377	1.48791	0.601182	1.51123		0.12634	-21.3199	0.287015	-3.0944	0.28701	-3.15177	0.286962	-3.27543
0.3787	-6.20285	0.813793	2.31235	0.330399	0.818454	0.218702	-4.86718		0.37852	-21.6746	0.378478	-21.7749	0.378452	-2.91956	0.263015	-21.5864		0.1647	-6.85949	0.636783	1.26928	0.632776	1.63003	0.64	1.60125		0.16845	-21.3192	0.327328	-3.10486	0.32742	-3.13159	0.327536	-3.28956
0.42658	-6.39782	0.858641	2.19432	0.409169	0.00496989	0.273378	-5.15031		0.42621	-21.6742	0.426134	-21.7749	0.426087	-2.76178	0.330792	-21.5937		0.20544	-6.9	0.675376	1.73512	0.671174	1.77712	0.678817	1.74424		0.22124	-21.3195	0.373636	-3.14568	0.373728	-3.20942	0.373857	-3.38221
0.47447	-6.35433	0.905761	2.98219	0.487938	0.0905127	0.328053	-5.27613		0.47391	-21.6746	0.47379	-21.7757	0.473722	-2.67996	0.410782	-21.5859		0.24617	-6.92147	0.713969	2.30392	0.709573	1.90034	0.717634	1.94708		0.27403	-21.3203	0.419944	-3.07462	0.420035	-3.16008	0.420179	-3.39255
0.52235	-6.32608	0.95288	2.68451	0.566708	0.349633	0.385369	-5.17429		0.5216	-21.6753	0.521446	-21.776	0.521357	-2.55151	0.490773	-21.5785		0.28691	-6.9092	0.754675	1.64824	0.748344	2.04753	0.759901	2.08477		0.32682	-21.3212	0.466253	-3.17412	0.466343	-3.27439	0.4665	-3.53198
0.57023	-6.31609	1	2.66293	0.645398	0.0907154	0.442684	-4.8988		0.56929	-21.6753	0.569102	-21.7763	0.568992	-2.62514	0.570763	-21.5755		0.32765	-6.88508	0.795382	1.92536	0.787115	2.42383	0.802168	2.19248		0.37306	-21.3209	0.512561	-2.95928	0.51265	-3.03433	0.512822	-3.25578
0.62338	-6.32835	0	--	0.724089	0.00488281	0.5	-4.57195		0.62223	-21.6752	0.622	-21.776	0.621866	-2.54118	0.650673	-21.5785		0.37398	-6.94638	0.836088	2.38052	0.825886	2.79016	0.844435	2.20081		0.4193	-21.3202	0.55887	-3.27986	0.558958	-3.39081	0.559143	-3.6618
0.67654	-6.36267	0	2.99554	0.791135	0.362764	0.554676	-4.80624		0.67517	-21.6744	0.674899	-21.7757	0.674741	-2.72562	0.730584	-21.5859		0.42032	-7.07361	0.877066	1.88101	0.869415	2.39411	0.883327	2.18002		0.46554	-21.3208	0.597421	-3.04512	0.597509	-3.12696	0.597706	-3.35627
0.72969	-6.36359	0.0471196	2.97105	0.85818	0.739393	0.609351	-5.07554		0.72811	-21.6743	0.727797	-21.7746	0.727616	-2.80606	0.801561	-21.5795		0.46666	-7.18312	0.918044	1.48988	0.912943	1.9658	0.922218	1.8011		0.51178	-21.3214	0.635973	-3.07222	0.63606	-3.16264	0.636269	-3.34844
0.77667	-6.42936	0.0942392	2.99697	0.92909	0.259459	0.664027	-5.50253		0.77451	-21.6739	0.774081	-21.7747	0.773832	-2.67515	0.872539	-21.5772		0.51299	-7.21872	0.959022	1.2446	0.956472	1.50062	0.961109	1.54088		0.55802	-21.3213	0.674525	-3.22501	0.674611	-3.32124	0.674831	-3.5363
0.82366	-6.46574	0.141359	2.1944	1	0.349633	0.718702	-5.51743		0.82091	-21.6735	0.820365	-21.7746	0.820048	-2.63626	0.936269	-21.5763		0.55933	-7.16011	1	1.15866	1	1.41823	1	1.46982		0.60935	-21.3214	0.713076	-3.00799	0.713162	-3.07798	0.713394	-3.28999
0.87064	-6.46014	0.188659	2.61576	0	--	0.773378	-5.30928		0.86731	-21.6733	0.86665	-21.7744	0.866263	-2.37883	1	-21.5755		0.61076	-7.21932	0	--	0	--	0	--		0.66068	-21.3206	0.753358	-3.06636	0.753515	-3.11807	0.753849	-3.3017
0.91376	-6.4676	0.235958	2.7773	0	0.389583	0.828053	-5.1377		0.91154	-21.6741	0.9111	-21.7755	0.910842	-2.5884	0	--		0.6622	-7.16401	0	1.15994	0	1.42947	0	1.48306		0.71201	-21.3205	0.793641	-3.05731	0.793867	-3.15757	0.794304	-3.35706
0.95688	-6.39628	0.283258	2.55549	0.0709098	0.296683	0.885369	-5.32054		0.95577	-21.675	0.95555	-21.7763	0.955421	-2.63832	0	-21.5752		0.71363	-7.02974	0.040978	1.25438	0.0435284	1.59237	0.0388911	1.58423		0.75185	-21.3205	0.833923	-3.06072	0.83422	-3.14128	0.834759	-3.33377
1	-6.31609	0.330558	2.74338	0.14182	0.739399	0.942684	-5.34338		1	-21.6753	1	-21.7763	1	-2.62514	0.0637306	-21.5746		0.75419	-7.02402	0.081956	1.49129	0.0870568	1.99574	0.0777823	1.81661		0.7917	-21.3197	0.875442	-2.89149	0.875665	-2.97812	0.87607	-3.17136
0	--	0.389612	2.61647	0.236109	0.690308	1	-5.32085		0	--	0	--	0	--	0.127461	-21.5741		0.79475	-6.95777	0.122934	1.88239	0.130585	2.45583	0.116673	2.19796		0.83155	-21.3192	0.916961	-2.89641	0.91711	-2.96465	0.91738	-3.13141
0	-6.31299	0.448667	2.72047	0.330399	0.818461	0	--		0	-21.6753	0	-21.7761	0	-2.44651	0.195238	-21.577		0.8353	-6.85949	0.163912	2.38199	0.174114	2.7906	0.155565	2.20746		0.87366	-21.3199	0.958481	-3.11303	0.958555	-3.20212	0.95869	-3.4433
0.04312	-6.34558	0.507721	2.93563	0.409169	0.189535	0	-5.31986		0.04423	-21.6747	0.0444501	-21.7757	0.0445789	-2.61301	0.263015	-21.5843		0.87648	-7.07462	0.204886	2.19357	0.211924	2.6394	0.198981	2.35449		0.91577	-21.3206	1	-3.27986	1	-3.39081	1	-3.6618
0.08624	-6.40889	0.566775	2.99554	0.487938	0.259107	0.0546755	-5.34351		0.08846	-21.674	0.0889002	-21.775	0.0891577	-2.56167	0.330792	-21.5917		0.91765	-7.20949	0.245861	1.97558	0.249735	2.23647	0.242397	2.23801		0.95789	-21.3211	0	--	0	--	0	--
0.12936	-6.46012	0.619216	2.89977	0.566708	0.389583	0.109351	-4.55595		0.13269	-21.6733	0.13335	-21.7744	0.133737	-2.37879	0.410782	-21.5845		0.95883	-7.2398	0.286835	1.97971	0.287546	1.69382	0.285813	1.99318		1	-21.3213	0	-3.02496	0	-3.05474	0	-3.18307
0.17972	-6.46032	0.671656	2.8271	0.645398	0.258103	0.164027	-4.54892		0.18222	-21.6734	0.182718	-21.7743	0.183007	-2.53975	0.490773	-21.5776		1	-7.16011	0.32781	2.13843	0.325357	1.98315	0.329229	2.15728		0	--	0.0415193	-3.00327	0.0414449	-3.03324	0.0413101	-3.16029
0.23009	-6.31715	0.724096	2.65546	0.724089	0.18864	0.218702	-4.84892		0.23176	-21.6739	0.232086	-21.7739	0.232277	-2.7	0.570763	-21.5752		0	--	0.366441	1.84409	0.363794	1.9834	0.368085	1.93335		0	-21.3196	0.0830387	-2.88865	0.0828899	-2.95826	0.0826203	-3.09756
0.28045	-6.12871	0.768944	2.85051	0.791135	0.546586	0.273378	-5.14987		0.28129	-21.6744	0.281454	-21.7746	0.281547	-2.9362	0.650673	-21.5776		0	-7.1598	0.405072	2.38436	0.402231	2.24536	0.406941	2.20971		0.04211	-21.3194	0.124558	-2.83642	0.124335	-2.87464	0.12393	-3.06731
0.33082	-5.96974	0.813793	2.82302	0.85818	0.739399	0.328053	-5.27578		0.33083	-21.6744	0.330822	-21.7744	0.330817	-2.84371	0.730584	-21.5844		0.04117	-7.11588	0.443704	1.73922	0.440668	1.81507	0.445797	1.83217		0.08423	-21.3201	0.166077	-3.04569	0.16578	-3.14067	0.165241	-3.33296
0.3787	-5.99625	0.858641	2.1944	0.92909	0.296683	0.385369	-5.05088		0.37852	-21.6745	0.378478	-21.7746	0.378452	-2.69624	0.801561	-21.577		0.08235	-7.05537	0.482335	1.62914	0.479105	2.03175	0.484653	1.79323		0.12634	-21.3197	0.20639	-3.13823	0.20619	-3.23375	0.205814	-3.42616
0.42658	-6.05742	0.905761	2.99697	1	0.389583	0.442684	-4.8827		0.42621	-21.6739	0.426134	-21.7745	0.426087	-2.66952	0.872539	-21.5741		0.12352	-6.95829	0.520967	1.28202	0.517542	1.58858	0.523509	1.60339		0.16845	-21.3191	0.246703	-3.28772	0.2466	-3.38989	0.246388	-3.52151
0.47447	-6.14102	0.95288	2.97105	0	--	0.5	-4.57129		0.47391	-21.6743	0.47379	-21.7752	0.473722	-2.65558	0.936269	-21.5746		0.1647	-6.85948	0.559598	1.15994	0.555979	1.42947	0.562365	1.48306		0.22124	-21.3194	0.287015	-3.08196	0.28701	-3.15147	0.286962	-3.27508
0.52235	-6.25047	1	2.99554	0	0.492567	0.554676	-4.59009		0.5216	-21.6749	0.521446	-21.7759	0.521357	-2.50618	1	-21.5752		0.20544	-6.89998	0.598191	1.28179	0.594377	1.58826	0.601182	1.60306		0.27403	-21.3203	0.327328	-3.09677	0.32742	-3.13082	0.327536	-3.28854
0.57023	-6.31299	0	--	0.0709098	0.587141	0.609351	-4.4722		0.56929	-21.6753	0.569102	-21.7761	0.568992	-2.44651	0	--		0.24617	-6.92146	0.636783	1.62824	0.632776	2.03065	0.64	1.79149		0.32682	-21.3212	0.373636	-3.06718	0.373728	-3.13762	0.373857	-3.34237
0.62338	-6.23824	0	3.33103	0.14182	0.836581	0.664027	-5.0494		0.62223	-21.6748	0.622	-21.7758	0.621866	-2.51012	0	-21.5751		0.28691	-6.90919	0.675376	1.73657	0.671174	1.81849	0.678817	1.82978		0.37306	-21.3198	0.419944	-2.89321	0.420035	-2.98	0.420179	-3.18057
0.67654	-6.12032	0.0471196	3.32978	0.236109	0.786995	0.718702	-5.51698		0.67517	-21.6742	0.674899	-21.7751	0.674741	-2.58484	0.0637306	-21.5744		0.32765	-6.88507	0.713969	2.38276	0.709573	2.24944	0.717634	2.21382		0.4193	-21.3198	0.466253	-3.1376	0.466343	-3.2295	0.4665	-3.43161
0.72969	-6.03422	0.0942392	3.31883	0.330399	0.826861	0.773378	-5.30813		0.72811	-21.6741	0.727797	-21.7746	0.727616	-2.73768	0.127461	-21.5739		0.37398	-6.93709	0.754675	2.43129	0.748344	2.30801	0.759901	2.19873		0.46554	-21.3193	0.512561	-2.92778	0.51265	-2.96361	0.512822	-3.0976
0.77667	-6.25308	0.141359	3.38164	0.409169	1.05999	0.828053	-5.13555		0.77451	-21.6736	0.774081	-21.7744	0.773832	-2.63476	0.195238	-21.5768		0.42032	-7.0563	0.795382	2.37407	0.787115	2.60425	0.802168	2.23179		0.51178	-21.3195	0.55887	-3.02496	0.558958	-3.05474	0.559143	-3.18307
0.82366	-6.4465	0.188659	3.20693	0.487938	0.714678	0.885369	-5.07692		0.82091	-21.6734	0.820365	-21.7744	0.820048	-2.49155	0.263015	-21.5842		0.46666	-7.16027	0.836088	2.38199	0.825886	2.7906	0.844435	2.20746		0.55802	-21.3196	0.597421	-2.96389	0.597509	-2.99741	0.597706	-3.12947
0.87064	-6.46012	0.235958	3.05552	0.566708	0.492567	0.942684	-5.34228		0.86731	-21.6733	0.86665	-21.7744	0.866263	-2.37879	0.330792	-21.5917		0.51299	-7.19374	0.877066	1.88239	0.869415	2.45583	0.883327	2.19796		0.60935	-21.3195	0.635973	-2.8938	0.63606	-2.97819	0.636269	-3.17016
0.91376	-6.40889	0.283258	2.65149	0.645398	0.71439	1	-5.31986		0.91154	-21.674	0.9111	-21.775	0.910842	-2.56167	0.410782	-21.5841		0.55933	-7.1598	0.918044	1.49129	0.912943	1.99574	0.922218	1.81661		0.66068	-21.3195	0.674525	-3.14597	0.674611	-3.23857	0.674831	-3.48091
0.95688	-6.34558	0.330558	2.77704	0.724089	1.05917	0	--		0.95577	-21.6747	0.95555	-21.7757	0.955421	-2.61301	0.490773	-21.5771		0.61076	-7.19439	0.959022	1.25438	0.956472	1.59237	0.961109	1.58423		0.71201	-21.3195	0.713076	-2.97558	0.713162	-3.05925	0.713394	-3.25058
1	-6.31299	0.389612	2.71165	0.791135	0.6189	0	-5.11996		1	-21.6753	1	-21.7761	1	-2.44651	0.570763	-21.5751		0.6622	-7.14211	1	1.15994	1	1.42947	1	1.48306		0.75185	-21.3194	0.753358	-2.97789	0.753515	-3.05902	0.753849	-3.27772
0	--	0.448667	2.74486	0.85818	0.836581	0.0546755	-4.77245		0	--	0	--	0	--	0.650673	-21.5771		0.71363	-7.01486	0	--	0	--	0	--		0.7917	-21.3191	0.793641	-3.04407	0.793867	-3.13104	0.794304	-3.3205
0	-6.31224	0.507721	3.14818	0.92909	0.587141	0.109351	-4.54033		0	-21.6736	0	-21.7747	0	-2.44629	0.730584	-21.5841		0.75419	-7.01975	0	1.22885	0	1.7081	0	1.52796		0.83155	-21.3191	0.833923	-3.04569	0.83422	-3.14067	0.834759	-3.33296
0.04312	-6.15728	0.566775	3.33103	1	0.492567	0.164027	-4.54835		0.04423	-21.6736	0.0444501	-21.7743	0.0445789	-2.61289	0.801561	-21.5768		0.79475	-6.95662	0.040978	1.36892	0.0435284	1.59735	0.0388911	1.59433		0.87366	-21.3197	0.875442	-2.83642	0.875665	-2.87464	0.87607	-3.06731
0.08624	-5.96566	0.619216	3.18468	0	--	0.218702	-4.37462		0.08846	-21.6735	0.0889002	-21.7734	0.0891577	-2.50494	0.872539	-21.5739		0.8353	-6.85948	0.081956	1.77761	0.0870568	2.11186	0.0777823	1.90642		0.91577	-21.3201	0.916961	-2.88865	0.91711	-2.95826	0.91738	-3.09756
0.12936	-5.75755	0.671656	2.88214	0	0.579175	0.273378	-4.27744		0.13269	-21.6732	0.13335	-21.7742	0.133737	-2.36612	0.936269	-21.5744		0.87648	-6.95829	0.122934	2.03658	0.130585	2.57878	0.116673	2.32627		0.95789	-21.3194	0.958481	-3.00327	0.958555	-3.03324	0.95869	-3.16029
0.17972	-5.76601	0.724096	2.73585	0.0709098	0.629336	0.328053	-4.23451		0.18222	-21.6732	0.182718	-21.7741	0.183007	-2.46464	1	-21.5751		0.91765	-7.05537	0.163912	2.38297	0.174114	3.27722	0.155565	2.31202		1	-21.3196	1	-3.02496	1	-3.05474	1	-3.18307
0.23009	-5.79596	0.768944	2.93993	0.14182	0.836605	0.385369	-4.44938		0.23176	-21.6732	0.232086	-21.7739	0.232277	-2.62257	0	--		0.95883	-7.11588	0.204886	2.27793	0.211924	2.6848	0.198981	2.84776		0	--	0	--	0	--	0	--
0.28045	-5.8595	0.813793	3.22292	0.236109	0.801704	0.442684	-4.88197		0.28129	-21.6737	0.281454	-21.7736	0.281547	-2.50766	0	-21.5736		1	-7.1598	0.245861	2.05086	0.249735	2.4203	0.242397	2.41241		0	-21.3169	0	-2.70405	0	-2.78153	0	-2.98141
0.33082	-5.96973	0.858641	3.38164	0.330399	0.826862	0.5	-4.43721		0.33083	-21.6743	0.330822	-21.7744	0.330817	-2.84368	0.0637306	-21.5737		0	--	0.286835	2.0075	0.287546	2.26939	0.285813	2.20732		0.04211	-21.3185	0.0415193	-2.69983	0.0414449	-2.77944	0.0413101	-2.97755
0.3787	-5.98695	0.905761	3.31883	0.409169	1.08724	0.554676	-4.58956		0.37852	-21.6739	0.378478	-21.7739	0.378452	-2.65988	0.127461	-21.5739		0	-7.1364	0.32781	2.14008	0.325357	2.0011	0.329229	2.20631		0.08423	-21.3189	0.0830387	-2.77979	0.0828899	-2.84597	0.0826203	-3.05821
0.42658	-6.04752	0.95288	3.32978	0.487938	0.772719	0.609351	-4.47156		0.42621	-21.6738	0.426134	-21.7744	0.426087	-2.6403	0.195238	-21.5762		0.04117	-7.11563	0.366441	2.25037	0.363794	2.10329	0.368085	2.18837		0.12634	-21.3184	0.124558	-2.79008	0.124335	-2.87389	0.12393	-3.00304
0.47447	-6.1394	1	3.33103	0.566708	0.579175	0.664027	-4.60428		0.47391	-21.6739	0.47379	-21.7739	0.473722	-2.51943	0.263015	-21.5829		0.08235	-7.05513	0.405072	2.38504	0.402231	2.56285	0.406941	2.58296		0.16845	-21.3187	0.166077	-2.7698	0.16578	-2.84505	0.165241	-3.02928
0.52235	-6.2282	0	--	0.645398	0.773837	0.718702	-4.7974		0.5216	-21.6737	0.521446	-21.7744	0.521357	-2.49137	0.330792	-21.5916		0.12352	-6.95804	0.443704	2.15931	0.440668	2.61523	0.445797	2.55479		0.22124	-21.3186	0.20639	-2.75693	0.20619	-2.8168	0.205814	-2.99456
0.57023	-6.31224	0	3.41647	0.724089	1.08624	0.773378	-5.01942		0.56929	-21.6736	0.569102	-21.7747	0.568992	-2.44629	0.410782	-21.5832		0.1647	-6.83134	0.482335	1.70632	0.479105	2.25945	0.484653	2.0014		0.27403	-21.3184	0.246703	-2.79304	0.2466	-2.84899	0.246388	-3.01373
0.62338	-6.21847	0.0471196	3.45068	0.791135	0.730435	0.828053	-4.71398		0.62223	-21.6737	0.622	-21.7743	0.621866	-2.50896	0.490773	-21.5766		0.20544	-6.85881	0.520967	1.35283	0.517542	1.62098	0.523509	1.66133		0.32682	-21.3181	0.287015	-2.9884	0.28701	-3.03704	0.286962	-3.20001
0.67654	-6.11842	0.0942392	3.33944	0.85818	0.836605	0.885369	-4.76361		0.67517	-21.6739	0.674899	-21.774	0.674741	-2.54676	0.570763	-21.5736		0.24617	-6.85924	0.559598	1.22885	0.555979	1.7081	0.562365	1.52796		0.37306	-21.3189	0.327328	-2.93559	0.32742	-3.03649	0.327536	-3.23711
0.72969	-6.02319	0.141359	3.3817	0.92909	0.629336	0.942684	-4.79187		0.72811	-21.6737	0.727797	-21.7742	0.727616	-2.61236	0.650673	-21.5766		0.28691	-6.86665	0.598191	1.35258	0.594377	1.6209	0.601182	1.66157		0.4193	-21.3188	0.373636	-2.83508	0.373728	-2.86386	0.373857	-3.0114
0.77667	-5.92432	0.188659	3.20718	1	0.579175	1	-5.11996		0.77451	-21.6735	0.774081	-21.7739	0.773832	-2.52734	0.730584	-21.5832		0.32765	-6.88507	0.636783	1.70541	0.632776	2.2576	0.64	2.00041		0.46554	-21.3192	0.419944	-2.88273	0.420035	-2.95377	0.420179	-3.12568
0.82366	-5.83369	0.235958	3.05985	0	--	0	--		0.82091	-21.6734	0.820365	-21.7739	0.820048	-2.47265	0.801561	-21.5763		0.37398	-6.87612	0.675376	2.15752	0.671174	2.61372	0.678817	2.55378		0.51178	-21.3182	0.466253	-2.72771	0.466343	-2.78711	0.4665	-2.97209
0.87064	-5.75755	0.283258	2.65179	0	0.608239	0	-4.73717		0.86731	-21.6732	0.86665	-21.7742	0.866263	-2.36612	0.872539	-21.5739		0.42032	-6.77448	0.713969	2.38345	0.709573	2.56397	0.717634	2.5837		0.55802	-21.3169	0.512561	-2.66597	0.51265	-2.74293	0.512822	-2.94001
0.91376	-5.96566	0.330558	2.77723	0.0709098	0.688597	0.0546755	-4.54891		0.91154	-21.6735	0.9111	-21.7734	0.910842	-2.50494	0.936269	-21.5737		0.46666	-6.8008	0.754675	2.46316	0.748344	2.85626	0.759901	2.21789		0.60935	-21.3183	0.55887	-2.70405	0.558958	-2.78153	0.559143	-2.98141
0.95688	-6.15728	0.389612	2.73946	0.14182	0.889784	0.109351	-4.53939		0.95577	-21.6736	0.95555	-21.7743	0.955421	-2.61289	1	-21.5736		0.51299	-7.01255	0.795382	2.46166	0.787115	2.86339	0.802168	2.73431		0.66068	-21.3191	0.597421	-2.68188	0.597509	-2.75925	0.597706	-2.95738
1	-6.31224	0.448667	2.9787	0.236109	0.856861	0.164027	-4.53124		1	-21.6736	1	-21.7747	1	-2.44629	0	--		0.55933	-7.1364	0.836088	2.38297	0.825886	3.27722	0.844435	2.31202		0.71201	-21.319	0.635973	-2.70607	0.63606	-2.74711	0.636269	-2.90585
0	--	0.507721	3.37691	0.330399	1.64565	0.218702	-4.37337		0	--	0	--	0	--	0	-21.5734		0.61076	-6.99182	0.877066	2.03658	0.869415	2.57878	0.883327	2.32627		0.75185	-21.3189	0.674525	-2.70061	0.674611	-2.77087	0.674831	-2.97109
0	-5.36234	0.566775	3.41647	0.409169	1.12098	0.273378	-4.27617		0	-21.6736	0	-21.7736	0	-2.44602	0.0637306	-21.5735		0.6622	-6.74934	0.918044	1.77761	0.912943	2.11186	0.922218	1.90642		0.7917	-21.319	0.713076	-2.90726	0.713162	-2.97922	0.713394	-3.17987
0.04312	-5.4167	0.619216	3.43743	0.487938	0.905899	0.328053	-4.23327		0.04423	-21.6734	0.0444501	-21.7734	0.0445789	-2.38941	0.127461	-21.5738		0.71363	-6.81678	0.959022	1.36892	0.956472	1.59735	0.961109	1.59433		0.83155	-21.3187	0.753358	-2.82215	0.753515	-2.91814	0.753849	-3.11049
0.08624	-5.56165	0.671656	3.09443	0.566708	0.608239	0.385369	-4.44814		0.08846	-21.6732	0.0889002	-21.7733	0.0891577	-2.48669	0.195238	-21.5761		0.75419	-6.8077	1	1.22885	1	1.7081	1	1.52796		0.87366	-21.3184	0.793641	-2.94947	0.793867	-3.04115	0.794304	-3.24798
0.12936	-5.75753	0.724096	2.75731	0.645398	0.906417	0.442684	-4.25862		0.13269	-21.6732	0.13335	-21.7742	0.133737	-2.36607	0.263015	-21.5828		0.79475	-6.82913	0	--	0	--	0	--		0.91577	-21.3189	0.833923	-2.7698	0.83422	-2.84505	0.834759	-3.02928
0.17972	-5.76599	0.768944	3.20421	0.724089	1.11947	0.5	-4.43704		0.18222	-21.6732	0.182718	-21.7741	0.183007	-2.46461	0.330792	-21.5916		0.8353	-6.83134	0	1.76609	0	1.72599	0	1.56739		0.95789	-21.3185	0.875442	-2.79008	0.875665	-2.87389	0.87607	-3.00304
0.23009	-5.79593	0.813793	3.2659	0.791135	0.803623	0.554676	-4.34569		0.23176	-21.6732	0.232086	-21.7739	0.232277	-2.62255	0.410782	-21.5826		0.87648	-6.95804	0.040978	1.449	0.0435284	1.65427	0.0388911	1.65151		1	-21.3169	0.916961	-2.77979	0.91711	-2.84597	0.91738	-3.05821
0.28045	-5.85948	0.858641	3.3817	0.85818	0.889784	0.609351	-4.40679		0.28129	-21.6737	0.281454	-21.7736	0.281547	-2.50758	0.490773	-21.5757		0.91765	-7.05513	0.081956	2.06131	0.0870568	2.25941	0.0777823	2.42782		0	--	0.958481	-2.69983	0.958555	-2.77944	0.95869	-2.97755
0.33082	-5.96972	0.905761	3.33944	0.92909	0.688597	0.664027	-4.36857		0.33083	-21.6743	0.330822	-21.7744	0.330817	-2.84364	0.570763	-21.5734		0.95883	-7.11563	0.122934	2.176	0.130585	2.68038	0.116673	2.63984		0	-21.3168	1	-2.70405	1	-2.78153	1	-2.98141
0.3787	-5.7623	0.95288	3.45068	1	0.608239	0.718702	-4.78619		0.37852	-21.6737	0.378478	-21.7739	0.378452	-2.62411	0.650673	-21.5757		1	-7.1364	0.163912	2.38387	0.174114	3.27727	0.155565	2.31503		0.04211	-21.317	0	--	0	--	0	--
0.42658	-5.59231	1	3.41647	0	--	0.773378	-4.79242		0.42621	-21.6737	0.426134	-21.7738	0.426087	-2.49734	0.730584	-21.5826		0	--	0.204886	2.28054	0.211924	2.69414	0.198981	2.87176		0.08423	-21.3177	0	-2.69029	0	-2.77108	0	-2.94157
0.47447	-5.46632	0	--	0	0.653612	0.828053	-4.71373		0.47391	-21.6735	0.47379	-21.7737	0.473722	-2.46829	0.801561	-21.576		0	-7.13614	0.245861	2.05399	0.249735	2.43189	0.242397	2.43526		0.12634	-21.3182	0.0415193	-2.68761	0.0414449	-2.76237	0.0413101	-2.92375
0.52235	-5.38863	0	3.79808	0.0709098	1.08981	0.885369	-4.76168		0.5216	-21.6735	0.521446	-21.7736	0.521357	-2.43099	0.872539	-21.5738		0.04117	-6.98156	0.286835	2.00801	0.287546	2.27989	0.285813	2.24448		0.16845	-21.3187	0.0830387	-2.7772	0.0828899	-2.84045	0.0826203	-3.04903
0.57023	-5.36234	0.0471196	3.58161	0.14182	0.889799	0.942684	-4.67836		0.56929	-21.6736	0.569102	-21.7736	0.568992	-2.44602	0.936269	-21.5735		0.08235	-6.72664	0.32781	2.14013	0.325357	2.0016	0.329229	2.2066		0.22124	-21.3186	0.124558	-2.72726	0.124335	-2.78039	0.12393	-2.96075
0.62338	-5.39471	0.0942392	3.4392	0.236109	0.871928	1	-4.73717		0.62223	-21.6735	0.622	-21.7736	0.621866	-2.3968	1	-21.5734		0.12352	-6.68646	0.366441	2.25061	0.363794	2.26067	0.368085	2.39078		0.27403	-21.3183	0.166077	-2.75626	0.16578	-2.84407	0.165241	-3.02758
0.67654	-5.49003	0.141359	3.67209	0.330399	1.64566	0	--		0.67517	-21.6735	0.674899	-21.7735	0.674741	-2.51514	0	--		0.1647	-6.83133	0.405072	2.5532	0.402231	2.71899	0.406941	2.62528		0.32682	-21.318	0.20639	-2.74343	0.20619	-2.81637	0.205814	-2.9933
0.72969	-5.64379	0.188659	3.47925	0.409169	1.4367	0	-4.73534		0.72811	-21.6735	0.727797	-21.774	0.727616	-2.56734	0	-12.9094		0.20544	-6.85879	0.443704	2.24728	0.440668	2.75701	0.445797	2.56397		0.37306	-21.3184	0.246703	-2.79016	0.2466	-2.84876	0.246388	-3.01254
0.77667	-5.65431	0.235958	3.14353	0.487938	0.908201	0.0546755	-4.54821		0.77451	-21.6735	0.774081	-21.7736	0.773832	-2.47792	0.0637306	-12.8607		0.24617	-6.85923	0.482335	2.04765	0.479105	2.31635	0.484653	2.11226		0.4193	-21.3186	0.287015	-2.98564	0.28701	-3.03681	0.286962	-3.19896
0.82366	-5.69587	0.283258	3.36393	0.566708	0.653612	0.109351	-4.44758		0.82091	-21.6733	0.820365	-21.7738	0.820048	-2.43711	0.127461	-12.7171		0.28691	-6.86664	0.520967	1.76938	0.517542	1.83167	0.523509	1.67929		0.46554	-21.3176	0.327328	-2.93505	0.32742	-3.03582	0.327536	-3.237
0.87064	-5.75753	0.330558	2.77918	0.645398	0.907704	0.164027	-4.47429		0.86731	-21.6732	0.86665	-21.7742	0.866263	-2.36607	0.195238	-12.6656		0.32765	-6.88504	0.559598	1.76609	0.555979	1.72599	0.562365	1.56739		0.51178	-21.3169	0.373636	-2.69711	0.373728	-2.76963	0.373857	-2.96149
0.91376	-5.56165	0.389612	3.01766	0.724089	1.43554	0.218702	-4.11553		0.91154	-21.6732	0.9111	-21.7733	0.910842	-2.48669	0.263015	-12.5153		0.37398	-6.79338	0.598191	1.76917	0.594377	1.8319	0.601182	1.67846		0.55802	-21.3168	0.419944	-2.78548	0.420035	-2.85204	0.420179	-3.04561
0.95688	-5.4167	0.448667	3.08667	0.791135	1.15037	0.273378	-3.29422		0.95577	-21.6734	0.95555	-21.7734	0.955421	-2.38941	0.330792	-12.28		0.42032	-6.61541	0.636783	2.047	0.632776	2.31527	0.64	2.11124		0.60935	-21.317	0.466253	-2.557	0.466343	-2.60461	0.4665	-2.74758
1	-5.36234	0.507721	3.45038	0.85818	0.889799	0.328053	-2.90127		1	-21.6736	1	-21.7736	1	-2.44602	0.410782	-12.6189		0.46666	-6.78618	0.675376	2.24545	0.671174	2.75714	0.678817	2.56226		0.66068	-21.3178	0.512561	-2.59132	0.51265	-2.65418	0.512822	-2.81306
0	--	0.566775	3.79808	0.92909	1.08981	0.385369	-3.31697		0	--	0	--	0	--	0.490773	-12.8353		0.51299	-6.99273	0.713969	2.55669	0.709573	2.71716	0.717634	2.62898		0.71201	-21.3187	0.55887	-2.69029	0.558958	-2.77108	0.559143	-2.94157
0	-3.9934	0.619216	3.46233	1	0.653612	0.442684	-3.89052		0	-21.6733	0	-21.7733	0	-2.44579	0.570763	-12.9094		0.55933	-7.13614	0.754675	2.58128	0.748344	2.86832	0.759901	2.7333		0.75185	-21.3182	0.597421	-2.6189	0.597509	-2.68657	0.597706	-2.8401
0.04312	-3.87628	0.671656	3.15852	0	--	0.5	-4.43564		0.04423	-21.6733	0.0444501	-21.7734	0.0445789	-2.27826	0.650673	-12.8355		0.61076	-6.97252	0.795382	2.48325	0.787115	2.98096	0.802168	2.73855		0.7917	-21.3182	0.635973	-2.68114	0.63606	-2.73373	0.636269	-2.88803
0.08624	-3.55347	0.724096	2.92972	0	1.1938	0.554676	-4.1236		0.08846	-21.673	0.0889002	-21.7733	0.0891577	-2.4863	0.730584	-12.6194		0.6622	-6.73594	0.836088	2.38387	0.825886	3.27727	0.844435	2.31503		0.83155	-21.3187	0.674525	-2.65257	0.674611	-2.71578	0.674831	-2.87789
0.12936	-3.08244	0.768944	3.25548	0.0709098	1.15452	0.609351	-4.20569		0.13269	-21.6731	0.13335	-21.7729	0.133737	-2.36543	0.801561	-12.7235		0.71363	-6.68187	0.877066	2.176	0.869415	2.68038	0.883327	2.63984		0.87366	-21.3182	0.713076	-2.66139	0.713162	-2.73003	0.713394	-2.92192
0.17972	-3.0579	0.813793	3.4851	0.14182	0.938009	0.664027	-4.24664		0.18222	-21.6731	0.182718	-21.7733	0.183007	-2.40389	0.872539	-12.7171		0.75419	-6.67852	0.918044	2.06131	0.912943	2.25941	0.922218	2.42782		0.91577	-21.3177	0.753358	-2.81638	0.753515	-2.90689	0.753849	-3.07642
0.23009	-3.15369	0.858641	3.67209	0.236109	1.40668	0.718702	-4.18694		0.23176	-21.673	0.232086	-21.7738	0.232277	-2.49119	0.936269	-12.8607		0.79475	-6.77973	0.959022	1.449	0.956472	1.65427	0.961109	1.65151		0.95789	-21.317	0.793641	-2.82821	0.793867	-2.90191	0.794304	-3.10031
0.28045	-3.1328	0.905761	3.4392	0.330399	1.65077	0.773378	-4.49819		0.28129	-21.6728	0.281454	-21.7734	0.281547	-2.44336	1	-12.9094		0.8353	-6.83133	1	1.76609	1	1.72599	1	1.56739		1	-21.3168	0.833923	-2.75626	0.83422	-2.84407	0.834759	-3.02758
0.33082	-2.96907	0.95288	3.58161	0.409169	1.58308	0.828053	-4.69406		0.33083	-21.6726	0.330822	-21.7729	0.330817	-2.36445	0	--		0.87648	-6.68646	0	--	0	--	0	--		0	--	0.875442	-2.72726	0.875665	-2.78039	0.87607	-2.96075
0.3787	-3.17854	1	3.79808	0.487938	0.951913	0.885369	-4.5836		0.37852	-21.6731	0.378478	-21.7736	0.378452	-2.52078	0	-12.349		0.91765	-6.72664	0	1.76749	0	2.06795	0	2.02932		0	-21.3166	0.916961	-2.7772	0.91711	-2.84045	0.91738	-3.04903
0.42658	-3.48971	0	--	0.566708	1.1938	0.942684	-4.67672		0.42621	-21.6736	0.426134	-21.7735	0.426087	-2.47725	0.0637306	-12.4847		0.95883	-6.98156	0.040978	2.29024	0.0435284	1.99838	0.0388911	1.77986		0.04211	-21.3162	0.958481	-2.68761	0.958555	-2.76237	0.95869	-2.92375
0.47447	-3.76152	0	3.80559	0.645398	0.952251	1	-4.73534		0.47391	-21.6733	0.47379	-21.7733	0.473722	-2.46312	0.127461	-12.7165		1	-7.13614	0.081956	2.7753	0.0870568	2.72998	0.0777823	2.44097		0.08423	-21.3167	1	-2.69029	1	-2.77108	1	-2.94157
0.52235	-3.93411	0.0471196	3.61479	0.724089	1.58036	0	--		0.5216	-21.6733	0.521446	-21.7734	0.521357	-2.35376	0.195238	-12.6651		0	--	0.122934	2.40537	0.130585	3.01869	0.116673	2.9993		0.12634	-21.3177	0	--	0	--	0	--
0.57023	-3.9934	0.0942392	3.54062	0.791135	1.1658	0	-4.52501		0.56929	-21.6733	0.569102	-21.7733	0.568992	-2.44579	0.263015	-12.5148		0	-6.39103	0.163912	2.78947	0.174114	3.35317	0.155565	2.76282		0.16845	-21.3175	0	-2.45066	0	-2.53887	0	-2.75511
0.62338	-3.92048	0.141359	3.67225	0.85818	0.938009	0.0546755	-4.36892		0.62223	-21.6733	0.622	-21.7734	0.621866	-2.34631	0.330792	-12.2797		0.04117	-6.4335	0.204886	2.74421	0.211924	3.11459	0.198981	2.99735		0.22124	-21.3176	0.0415193	-2.43171	0.0414449	-2.43799	0.0413101	-2.5659
0.67654	-3.7096	0.188659	3.48033	0.92909	1.15452	0.109351	-4.29728		0.67517	-21.6735	0.674899	-21.7733	0.674741	-2.44638	0.410782	-12.3731		0.08235	-6.54368	0.245861	2.85853	0.249735	3.08625	0.242397	2.98355		0.27403	-21.3177	0.0830387	-2.67103	0.0828899	-2.75323	0.0826203	-2.94379
0.72969	-3.38189	0.235958	3.14523	1	1.1938	0.164027	-4.47314		0.72811	-21.6735	0.727797	-21.7736	0.727616	-2.45045	0.490773	-12.3407		0.12352	-6.68621	0.286835	2.44695	0.287546	2.91413	0.285813	2.76676		0.32682	-21.318	0.124558	-2.71766	0.124335	-2.77852	0.12393	-2.94571
0.77667	-3.33295	0.283258	3.36522	0	--	0.218702	-4.09156		0.77451	-21.6733	0.774081	-21.7733	0.773832	-2.4549	0.570763	-12.349		0.1647	-6.83109	0.32781	2.7356	0.325357	2.79005	0.329229	2.67859		0.37306	-21.3175	0.166077	-2.68934	0.16578	-2.7361	0.165241	-2.93019
0.82366	-3.23314	0.330558	2.77951	0	1.25864	0.273378	-3.02542		0.82091	-21.673	0.820365	-21.7734	0.820048	-2.36805	0.650673	-12.3407		0.20544	-6.7169	0.366441	2.47476	0.363794	2.70015	0.368085	2.62695		0.4193	-21.317	0.20639	-2.7087	0.20619	-2.78172	0.205814	-2.98621
0.87064	-3.08244	0.389612	3.12024	0.0709098	1.15983	0.328053	-2.89517		0.86731	-21.6731	0.86665	-21.7729	0.866263	-2.36543	0.730584	-12.3731		0.24617	-6.57312	0.405072	2.55639	0.402231	2.81099	0.406941	2.71997		0.46554	-21.3164	0.246703	-2.63081	0.2466	-2.71197	0.246388	-2.93552
0.91376	-3.55347	0.448667	3.16528	0.14182	0.938032	0.385369	-3.31598		0.91154	-21.673	0.9111	-21.7733	0.910842	-2.4863	0.801561	-12.5976		0.28691	-6.42427	0.443704	2.43155	0.440668	2.9938	0.445797	2.71444		0.51178	-21.3162	0.287015	-2.60924	0.28701	-2.67057	0.286962	-2.85636
0.95688	-3.87628	0.507721	3.51073	0.236109	1.43557	0.442684	-3.88941		0.95577	-21.6733	0.95555	-21.7734	0.955421	-2.27826	0.872539	-12.7165		0.32765	-6.29443	0.482335	2.04811	0.479105	2.4311	0.484653	2.60891		0.55802	-21.3166	0.327328	-2.93058	0.32742	-3.02359	0.327536	-3.22483
1	-3.9934	0.566775	3.80559	0.330399	1.65077	0.5	-4.43389		1	-21.6733	1	-21.7733	1	-2.44579	0.936269	-12.4847		0.37398	-6.4429	0.520967	1.76946	0.517542	1.87334	0.523509	1.71021		0.60935	-21.3162	0.373636	-2.67363	0.373728	-2.73674	0.373857	-2.95698
0	--	0.619216	3.56081	0.409169	1.61941	0.554676	-4.12241		0	--	0	--	0	--	1	-12.349		0.42032	-6.56653	0.559598	1.76749	0.555979	2.06795	0.562365	2.02932		0.66068	-21.3165	0.419944	-2.58435	0.420035	-2.61805	0.420179	-2.82489
0	-2.83595	0.671656	3.19038	0.487938	0.97453	0.609351	-4.02411		0	-21.6733	0	-21.7733	0	-2.40658	0	--		0.46666	-6.61373	0.598191	1.76925	0.594377	1.87303	0.601182	1.70993		0.71201	-21.3172	0.466253	-2.46542	0.466343	-2.50136	0.4665	-2.63519
0.04312	-2.8737	0.724096	3.02792	0.566708	1.25864	0.664027	-4.24571		0.04423	-21.6731	0.0444501	-21.7733	0.0445789	-2.27805	0	-12.1828		0.51299	-6.45785	0.636783	2.04745	0.632776	2.42916	0.64	2.60707		0.75185	-21.3177	0.512561	-2.57474	0.51265	-2.64938	0.512822	-2.80244
0.08624	-2.88002	0.768944	3.44859	0.645398	0.973863	0.718702	-4.12809		0.08846	-21.6729	0.0889002	-21.7732	0.0891577	-2.37929	0.0637306	-12.3118		0.55933	-6.39103	0.675376	2.43012	0.671174	2.99178	0.678817	2.71251		0.7917	-21.3178	0.55887	-2.45066	0.558958	-2.53887	0.559143	-2.75511
0.12936	-3.08242	0.813793	3.4999	0.724089	1.62105	0.773378	-4.36345		0.13269	-21.6731	0.13335	-21.7729	0.133737	-2.3654	0.127461	-12.2055		0.61076	-6.47215	0.713969	2.55808	0.709573	2.81484	0.717634	2.71829		0.83155	-21.3175	0.597421	-2.48737	0.597509	-2.51707	0.597706	-2.67558
0.17972	-3.05788	0.858641	3.67225	0.791135	1.27613	0.828053	-4.69372		0.18222	-21.673	0.182718	-21.7733	0.183007	-2.40384	0.195238	-12.1531		0.6622	-6.6514	0.754675	2.60604	0.748344	2.92959	0.759901	2.93406		0.87366	-21.3177	0.635973	-2.55389	0.63606	-2.60531	0.636269	-2.80121
0.23009	-3.15368	0.905761	3.54062	0.85818	0.938032	0.885369	-4.58249		0.23176	-21.673	0.232086	-21.7738	0.232277	-2.49116	0.263015	-12.0005		0.71363	-6.49729	0.795382	2.59726	0.787115	3.09516	0.802168	2.76008		0.91577	-21.3167	0.674525	-2.56432	0.674611	-2.61998	0.674831	-2.79723
0.28045	-3.1328	0.95288	3.61479	0.92909	1.15983	0.942684	-4.52505		0.28129	-21.6728	0.281454	-21.7734	0.281547	-2.44335	0.330792	-12.2793		0.75419	-6.66351	0.836088	2.78947	0.825886	3.35317	0.844435	2.76282		0.95789	-21.3162	0.713076	-2.65136	0.713162	-2.68767	0.713394	-2.83066
0.33082	-2.96907	1	3.80559	1	1.25864	1	-4.52501		0.33083	-21.6726	0.330822	-21.7729	0.330817	-2.36437	0.410782	-12.0788		0.79475	-6.75262	0.877066	2.40537	0.869415	3.01869	0.883327	2.9993		1	-21.3166	0.753358	-2.70005	0.753515	-2.76264	0.753849	-2.9245
0.3787	-3.14574	0	--	0	--	0	--		0.37852	-21.673	0.378478	-21.7736	0.378452	-2.44073	0.490773	-12.2779		0.8353	-6.83109	0.918044	2.7753	0.912943	2.72998	0.922218	2.44097		0	--	0.793641	-2.69554	0.793867	-2.74429	0.794304	-2.89077
0.42658	-3.25799	0	3.84083	0	1.40919	0	-4.5243		0.42621	-21.6732	0.426134	-21.773	0.426087	-2.39854	0.570763	-12.1828		0.87648	-6.68621	0.959022	2.29024	0.956472	1.99838	0.961109	1.77986		0	-21.3163	0.833923	-2.68934	0.83422	-2.7361	0.834759	-2.93019
0.47447	-3.20932	0.0471196	3.64604	0.0709098	1.20933	0.0546755	-4.36739		0.47391	-21.6732	0.47379	-21.7731	0.473722	-2.32148	0.650673	-12.2781		0.91765	-6.54368	1	1.76749	1	2.06795	1	2.02932		0.04211	-21.3157	0.875442	-2.71766	0.875665	-2.77852	0.87607	-2.94571
0.52235	-3.05305	0.0942392	3.69732	0.14182	0.966158	0.109351	-4.29671		0.5216	-21.6732	0.521446	-21.7733	0.521357	-2.30643	0.730584	-12.0783		0.95883	-6.4335	0	--	0	--	0	--		0.08423	-21.3163	0.916961	-2.67103	0.91711	-2.75323	0.91738	-2.94379
0.57023	-2.83595	0.141359	3.69954	0.236109	1.72833	0.164027	-3.66358		0.56929	-21.6733	0.569102	-21.7733	0.568992	-2.40658	0.801561	-12.1947		1	-6.39103	0	1.76788	0	2.71908	0	2.10445		0.12634	-21.3168	0.958481	-2.43171	0.958555	-2.43799	0.95869	-2.5659
0.62338	-3.0744	0.188659	3.87419	0.330399	2.03816	0.218702	-2.76947		0.62223	-21.6732	0.622	-21.7733	0.621866	-2.34247	0.872539	-12.2055		0	--	0.040978	2.3816	0.0435284	3.14824	0.0388911	2.2737		0.16845	-21.3174	1	-2.45066	1	-2.53887	1	-2.75511
0.67654	-3.23028	0.235958	3.91703	0.409169	1.82298	0.273378	-2.81912		0.67517	-21.6732	0.674899	-21.7733	0.674741	-2.39389	0.936269	-12.3118		0	-6.3908	0.081956	2.79148	0.0870568	3.32718	0.0777823	2.74943		0.22124	-21.3175	0	--	0	--	0	--
0.72969	-3.24642	0.283258	3.45312	0.487938	1.53249	0.328053	-2.89431		0.72811	-21.6733	0.727797	-21.773	0.727616	-2.38427	1	-12.1828		0.04117	-6.43327	0.122934	2.74087	0.130585	3.21241	0.116673	3.07465		0.27403	-21.3177	0	-2.3704	0	-2.35441	0	-2.44517
0.77667	-3.19277	0.330558	3.43864	0.566708	1.40919	0.385369	-3.1338		0.77451	-21.673	0.774081	-21.7733	0.773832	-2.36512	0	--		0.08235	-6.54344	0.163912	2.78987	0.174114	3.35354	0.155565	2.77252		0.32682	-21.3179	0.0415193	-2.42088	0.0414449	-2.43267	0.0413101	-2.56245
0.82366	-3.04644	0.389612	3.1895	0.645398	1.53224	0.442684	-3.77441		0.82091	-21.673	0.820365	-21.7732	0.820048	-2.36022	0	-12.1777		0.12352	-6.60278	0.204886	2.74505	0.211924	3.12078	0.198981	3.0059		0.37306	-21.3172	0.0830387	-2.62749	0.0828899	-2.69358	0.0826203	-2.85008
0.87064	-3.08242	0.448667	3.55702	0.724089	1.82103	0.5	-3.38233		0.86731	-21.6731	0.86665	-21.7729	0.866263	-2.3654	0.0637306	-12.046		0.1647	-6.83107	0.245861	2.86	0.249735	3.09327	0.242397	3.00752		0.4193	-21.3166	0.124558	-2.71243	0.124335	-2.77195	0.12393	-2.9283
0.91376	-2.88002	0.507721	3.80425	0.791135	1.35048	0.554676	-3.86772		0.91154	-21.6729	0.9111	-21.7732	0.910842	-2.37929	0.127461	-12.2047		0.20544	-6.71687	0.286835	2.44877	0.287546	2.92281	0.285813	2.80178		0.46554	-21.3163	0.166077	-2.67515	0.16578	-2.73556	0.165241	-2.9297
0.95688	-2.8737	0.566775	3.84083	0.85818	0.966158	0.609351	-3.77162		0.95577	-21.6731	0.95555	-21.7733	0.955421	-2.27805	0.195238	-12.1523		0.24617	-6.57309	0.32781	2.73575	0.325357	2.79022	0.329229	2.67871		0.51178	-21.3158	0.20639	-2.70127	0.20619	-2.78152	0.205814	-2.98594
1	-2.83595	0.619216	3.79967	0.92909	1.20933	0.664027	-3.7066		1	-21.6733	1	-21.7733	1	-2.40658	0.263015	-11.9997		0.28691	-6.42423	0.366441	2.65282	0.363794	3.06843	0.368085	2.94129		0.55802	-21.3163	0.246703	-2.63	0.2466	-2.71187	0.246388	-2.93531
0	--	0.671656	3.62819	1	1.40919	0.718702	-4.12674		0	--	0	--	0	--	0.330792	-12.2787		0.32765	-6.29441	0.405072	2.55656	0.402231	3.22595	0.406941	2.99346		0.60935	-21.3158	0.287015	-2.60064	0.28701	-2.67017	0.286962	-2.85604
0	-2.83592	0.724096	3.31996	0	--	0.773378	-4.36176		0	-21.6727	0	-21.7733	0	-2.14304	0.410782	-12.0729		0.37398	-6.37286	0.443704	2.43241	0.440668	3.20817	0.445797	3.04189		0.66068	-21.3163	0.327328	-2.92588	0.32742	-3.02286	0.327536	-3.22474
0.04312	-2.87367	0.768944	3.62576	0	1.76956	0.828053	-4.53201		0.04423	-21.6727	0.0444501	-21.7731	0.0445789	-2.25122	0.490773	-11.939		0.42032	-6.55738	0.482335	2.31249	0.479105	3.00048	0.484653	2.67549		0.71201	-21.3168	0.373636	-2.65365	0.373728	-2.72402	0.373857	-2.8991
0.08624	-2.87998	0.813793	3.79653	0.0709098	1.46294	0.885369	-4.55298		0.08846	-21.6727	0.0889002	-21.7732	0.0891577	-2.33821	0.570763	-12.1777		0.46666	-6.49546	0.520967	2.443	0.517542	2.89374	0.523509	2.45332		0.75185	-21.3169	0.419944	-2.54489	0.420035	-2.61125	0.420179	-2.75201
0.12936	-2.82709	0.858641	3.69954	0.14182	0.966171	0.942684	-4.52437		0.13269	-21.6729	0.13335	-21.7729	0.133737	-2.2555	0.650673	-11.9389		0.51299	-6.43057	0.559598	1.76788	0.555979	2.71908	0.562365	2.10445		0.7917	-21.3172	0.466253	-2.39219	0.466343	-2.44733	0.4665	-2.60374
0.17972	-3.03988	0.905761	3.69732	0.236109	1.72988	1	-4.5243		0.18222	-21.6729	0.182718	-21.7726	0.183007	-2.29806	0.730584	-12.0734		0.55933	-6.3908	0.598191	2.44216	0.594377	2.89359	0.601182	2.45307		0.83155	-21.3174	0.512561	-2.52842	0.51265	-2.55219	0.512822	-2.69598
0.23009	-2.9867	0.95288	3.64604	0.330399	2.03816	0	--		0.23176	-21.6728	0.232086	-21.773	0.232277	-2.31775	0.801561	-12.1051		0.61076	-6.43813	0.636783	2.31459	0.632776	3.00028	0.64	2.67508		0.87366	-21.3168	0.55887	-2.3704	0.558958	-2.35441	0.559143	-2.44517
0.28045	-2.88761	1	3.84083	0.409169	1.87131	0	-3.83335		0.28129	-21.6725	0.281454	-21.7733	0.281547	-2.43768	0.872539	-12.2047		0.6622	-6.50475	0.675376	2.43098	0.671174	3.20721	0.678817	3.0396		0.91577	-21.3163	0.597421	-2.44683	0.597509	-2.50303	0.597706	-2.66175
0.33082	-2.96907	0	--	0.487938	1.67014	0.0546755	-3.57969		0.33083	-21.6726	0.330822	-21.7728	0.330817	-2.36434	0.936269	-12.046		0.71363	-6.49443	0.713969	2.55842	0.709573	3.22432	0.717634	2.99207		0.95789	-21.3157	0.635973	-2.51159	0.63606	-2.5816	0.636269	-2.76623
0.3787	-3.0358	0	3.85697	0.566708	1.76956	0.109351	-3.10437		0.37852	-21.6728	0.378478	-21.7729	0.378452	-2.39635	1	-12.1777		0.75419	-6.55413	0.754675	2.70673	0.748344	3.43923	0.759901	2.95072		1	-21.3163	0.674525	-2.49489	0.674611	-2.52439	0.674831	-2.6613
0.42658	-3.01483	0.0471196	3.95269	0.645398	1.66895	0.164027	-2.93045		0.42621	-21.673	0.426134	-21.773	0.426087	-2.36783	0	--		0.79475	-6.68149	0.795382	2.72846	0.787115	3.15429	0.802168	2.86682		0	--	0.713076	-2.48682	0.713162	-2.55667	0.713394	-2.737
0.47447	-2.89507	0.0942392	3.8469	0.724089	1.87058	0.218702	-2.76805		0.47391	-21.673	0.47379	-21.7731	0.473722	-2.27585	0	-11.8677		0.8353	-6.83107	0.836088	2.78987	0.825886	3.35354	0.844435	2.77252		0	-21.3146	0.753358	-2.674	0.753515	-2.72375	0.753849	-2.88
0.52235	-2.77556	0.141359	3.69965	0.791135	1.47943	0.273378	-2.81805		0.5216	-21.6729	0.521446	-21.7733	0.521357	-2.15279	0.0637306	-11.8335		0.87648	-6.60278	0.877066	2.74087	0.869415	3.21241	0.883327	3.07465		0.04211	-21.3152	0.793641	-2.53552	0.793867	-2.6092	0.794304	-2.82365
0.57023	-2.83592	0.188659	3.87504	0.85818	0.966171	0.328053	-2.5264		0.56929	-21.6727	0.569102	-21.7733	0.568992	-2.14304	0.127461	-11.6122		0.91765	-6.54344	0.918044	2.79148	0.912943	3.32718	0.922218	2.74943		0.08423	-21.3136	0.833923	-2.67515	0.83422	-2.73556	0.834759	-2.9297
0.62338	-2.78632	0.235958	3.91794	0.92909	1.46294	0.385369	-2.03921		0.62223	-21.6729	0.622	-21.7733	0.621866	-2.12491	0.195238	-11.6784		0.95883	-6.43327	0.959022	2.3816	0.956472	3.14824	0.961109	2.2737		0.12634	-21.3122	0.875442	-2.71243	0.875665	-2.77195	0.87607	-2.9283
0.67654	-2.9292	0.283258	3.45718	1	1.76956	0.442684	-2.53832		0.67517	-21.673	0.674899	-21.7731	0.674741	-2.32408	0.263015	-11.9855		1	-6.3908	1	1.76788	1	2.71908	1	2.10445		0.16845	-21.3109	0.916961	-2.62749	0.91711	-2.69358	0.91738	-2.85008
0.72969	-3.03313	0.330558	3.43884	0	--	0.5	-3.38152		0.72811	-21.673	0.727797	-21.773	0.727616	-2.33747	0.330792	-11.7638		0	--	0	--	0	--	0	--		0.22124	-21.3109	0.958481	-2.42088	0.958555	-2.43267	0.95869	-2.56245
0.77667	-3.06627	0.389612	3.5255	0	1.79259	0.554676	-3.08484		0.77451	-21.6728	0.774081	-21.7731	0.773832	-2.36135	0.410782	-11.9065		0	-6.09806	0	1.7691	0	3.17743	0	2.68821		0.27403	-21.3108	1	-2.3704	1	-2.35441	1	-2.44517
0.82366	-2.98892	0.448667	3.76997	0.0709098	1.51386	0.609351	-3.77039		0.82091	-21.6728	0.820365	-21.7727	0.820048	-2.30251	0.490773	-11.9049		0.04117	-6.16767	0.040978	2.38472	0.0435284	3.69464	0.0388911	2.9699		0.32682	-21.3106	0	--	0	--	0	--
0.87064	-2.82709	0.507721	3.81979	0.14182	1.62507	0.664027	-3.45038		0.86731	-21.6729	0.86665	-21.7729	0.866263	-2.2555	0.570763	-11.8677		0.08235	-6.35342	0.081956	2.90184	0.0870568	3.4489	0.0777823	3.28623		0.37306	-21.3116	0	-2.35848	0	-2.35407	0	-2.44501
0.91376	-2.87998	0.566775	3.85697	0.236109	1.83993	0.718702	-3.31179		0.91154	-21.6727	0.9111	-21.7732	0.910842	-2.33821	0.650673	-11.9052		0.12352	-6.42217	0.122934	2.92812	0.130585	3.45142	0.116673	3.08141		0.4193	-21.3127	0.0415193	-2.30156	0.0414449	-2.36838	0.0413101	-2.55095
0.95688	-2.87367	0.619216	3.83675	0.330399	2.04688	0.773378	-4.03876		0.95577	-21.6727	0.95555	-21.7731	0.955421	-2.25122	0.730584	-11.9067		0.1647	-6.09891	0.163912	2.79405	0.174114	3.37697	0.155565	2.78958		0.46554	-21.314	0.0830387	-2.61391	0.0828899	-2.68193	0.0826203	-2.84392
1	-2.83592	0.671656	3.78926	0.409169	2.04794	0.828053	-4.53138		1	-21.6727	1	-21.7733	1	-2.14304	0.801561	-11.7228		0.20544	-6.10807	0.204886	2.77752	0.211924	3.7536	0.198981	3.11593		0.51178	-21.3151	0.124558	-2.70429	0.124335	-2.77076	0.12393	-2.91503
0	--	0.724096	3.76574	0.487938	1.74681	0.885369	-4.51389		0	--	0	--	0	--	0.872539	-11.6122		0.24617	-6.13873	0.245861	3.12482	0.249735	3.63192	0.242397	3.3658		0.55802	-21.3146	0.166077	-2.64044	0.16578	-2.71117	0.165241	-2.90979
0	-2.62476	0.768944	3.85391	0.566708	1.79259	0.942684	-4.23466		0	-21.6724	0	-21.7733	0	-2.07313	0.936269	-11.8335		0.28691	-6.19859	0.286835	3.2226	0.287546	3.22271	0.285813	3.00674		0.60935	-21.315	0.20639	-2.51572	0.20619	-2.56842	0.205814	-2.71777
0.04312	-2.59617	0.813793	3.94338	0.645398	1.7463	1	-3.83335		0.04423	-21.6725	0.0444501	-21.7731	0.0445789	-2.2372	1	-11.8677		0.32765	-6.2944	0.32781	2.73632	0.325357	2.81093	0.329229	2.72818		0.66068	-21.3137	0.246703	-2.4033	0.2466	-2.43168	0.246388	-2.57453
0.08624	-2.72736	0.858641	3.69965	0.724089	2.04966	0	--		0.08846	-21.6727	0.0889002	-21.7727	0.0891577	-2.22457	0	--		0.37398	-6.36864	0.366441	2.65295	0.363794	3.08037	0.368085	2.99272		0.71201	-21.3123	0.287015	-2.38479	0.28701	-2.46967	0.286962	-2.70275
0.12936	-2.82708	0.905761	3.8469	0.791135	1.6591	0	-3.83037		0.13269	-21.6729	0.13335	-21.7729	0.133737	-2.25541	0	-11.8652		0.42032	-6.50998	0.405072	2.78722	0.402231	3.42106	0.406941	3.27258		0.75185	-21.3119	0.327328	-1.93907	0.32742	-2.00791	0.327536	-2.1775
0.17972	-3.03987	0.95288	3.95269	0.85818	1.62507	0.0546755	-3.57713		0.18222	-21.6729	0.182718	-21.7726	0.183007	-2.29797	0.0637306	-11.7107		0.46666	-6.38931	0.443704	2.9731	0.440668	3.54098	0.445797	3.17186		0.7917	-21.3115	0.373636	-2.62121	0.373728	-2.69963	0.373857	-2.85158
0.23009	-2.98668	1	3.85697	0.92909	1.51386	0.109351	-3.1026		0.23176	-21.6728	0.232086	-21.7729	0.232277	-2.31768	0.127461	-11.612		0.51299	-6.1846	0.482335	3.13135	0.479105	3.03795	0.484653	2.6972		0.83155	-21.3109	0.419944	-2.39647	0.420035	-2.4634	0.420179	-2.64261
0.28045	-2.88759	0	--	1	1.79259	0.164027	-2.9285		0.28129	-21.6725	0.281454	-21.7733	0.281547	-2.43764	0.195238	-11.678		0.55933	-6.09806	0.520967	2.44306	0.517542	3.54322	0.523509	3.17074		0.87366	-21.3122	0.466253	-2.37066	0.466343	-2.43235	0.4665	-2.59242
0.33082	-2.96906	0	3.8617	0	--	0.218702	-2.7548		0.33083	-21.6726	0.330822	-21.7728	0.330817	-2.3643	0.263015	-11.9851		0.61076	-6.20313	0.559598	1.7691	0.555979	3.17743	0.562365	2.68821		0.91577	-21.3136	0.512561	-2.40886	0.51265	-2.4767	0.512822	-2.6493
0.3787	-2.76992	0.0471196	4.05052	0	1.80851	0.273378	-2.58655		0.37852	-21.6725	0.378478	-21.7729	0.378452	-2.37629	0.330792	-11.7632		0.6622	-6.44021	0.598191	2.44222	0.594377	3.54261	0.601182	3.16998		0.95789	-21.3152	0.55887	-2.35848	0.558958	-2.35407	0.559143	-2.44501
0.42658	-2.83693	0.0942392	4.06793	0.0709098	1.55673	0.328053	-2.52568		0.42621	-21.6728	0.426134	-21.7728	0.426087	-2.30448	0.410782	-11.8588		0.71363	-6.48699	0.636783	3.13072	0.632776	3.04025	0.64	2.69938		1	-21.3146	0.597421	-2.37711	0.597509	-2.45524	0.597706	-2.6379
0.47447	-2.84019	0.141359	4.51594	0.14182	1.62508	0.385369	-2.03785		0.47391	-21.6726	0.47379	-21.7731	0.473722	-2.2535	0.490773	-11.8114		0.75419	-6.38363	0.675376	2.97432	0.671174	3.53792	0.678817	3.17202		0	--	0.635973	-2.48451	0.63606	-2.53061	0.636269	-2.66515
0.52235	-2.69413	0.188659	4.34404	0.236109	1.84553	0.442684	-2.08706		0.5216	-21.6723	0.521446	-21.7732	0.521357	-2.09517	0.570763	-11.8652		0.79475	-6.24569	0.713969	2.78753	0.709573	3.42224	0.717634	3.27337		0	-21.3145	0.674525	-2.32554	0.674611	-2.38268	0.674831	-2.5637
0.57023	-2.62476	0.235958	4.08962	0.330399	2.04688	0.5	-2.04705		0.56929	-21.6724	0.569102	-21.7733	0.568992	-2.07313	0.650673	-11.8111		0.8353	-6.09891	0.754675	2.76145	0.748344	3.47354	0.759901	3.0489		0.04211	-21.3133	0.713076	-2.45538	0.713162	-2.52405	0.713394	-2.71539
0.62338	-2.71932	0.283258	3.68583	0.409169	2.065	0.554676	-2.93131		0.62223	-21.6723	0.622	-21.7732	0.621866	-2.12378	0.730584	-11.858		0.87648	-6.42217	0.795382	2.7863	0.787115	3.55472	0.802168	3.02724		0.08423	-21.3118	0.753358	-2.41359	0.753515	-2.44706	0.753849	-2.62229
0.67654	-2.84507	0.330558	3.44048	0.487938	2.06671	0.609351	-2.98471		0.67517	-21.6727	0.674899	-21.7731	0.674741	-2.23415	0.801561	-11.6261		0.91765	-6.35342	0.836088	2.79405	0.825886	3.37697	0.844435	2.78958		0.12634	-21.311	0.793641	-2.52498	0.793867	-2.58246	0.794304	-2.73051
0.72969	-2.82177	0.389612	3.86885	0.566708	1.80851	0.664027	-3.44921		0.72811	-21.6727	0.727797	-21.7729	0.727616	-2.33637	0.872539	-11.612		0.95883	-6.16767	0.877066	2.92812	0.869415	3.45142	0.883327	3.08141		0.16845	-21.3109	0.833923	-2.64044	0.83422	-2.71117	0.834759	-2.90979
0.77667	-2.63973	0.448667	4.08437	0.645398	2.06671	0.718702	-3.31011		0.77451	-21.6726	0.774081	-21.7727	0.773832	-2.34702	0.936269	-11.7107		1	-6.09806	0.918044	2.90184	0.912943	3.4489	0.922218	3.28623		0.22124	-21.3109	0.875442	-2.70429	0.875665	-2.77076	0.87607	-2.91503
0.82366	-2.88281	0.507721	4.02061	0.724089	2.0612	0.773378	-3.94437		0.82091	-21.6728	0.820365	-21.7726	0.820048	-2.27536	1	-11.8652		0	--	0.959022	2.38472	0.956472	3.69464	0.961109	2.9699		0.27403	-21.3108	0.916961	-2.61391	0.91711	-2.68193	0.91738	-2.84392
0.87064	-2.82708	0.566775	3.8617	0.791135	1.79926	0.828053	-4.52907		0.86731	-21.6729	0.86665	-21.7729	0.866263	-2.25541	0	--		0	-5.32654	1	1.7691	1	3.17743	1	2.68821		0.32682	-21.3106	0.958481	-2.30156	0.958555	-2.36838	0.95869	-2.55095
0.91376	-2.72736	0.619216	4.03294	0.85818	1.62508	0.885369	-4.51327		0.91154	-21.6727	0.9111	-21.7727	0.910842	-2.22457	0	-11.5587		0.04117	-5.38142	0	--	0	--	0	--		0.37306	-21.3113	1	-2.35848	1	-2.35407	1	-2.44501
0.95688	-2.59617	0.671656	4.00199	0.92909	1.55673	0.942684	-4.23269		0.95577	-21.6725	0.95555	-21.7731	0.955421	-2.2372	0.0637306	-11.569		0.08235	-5.54243	0	3.77388	0	3.78644	0	3.6943		0.4193	-21.3118	0	--	0	--	0	--
1	-2.62476	0.724096	3.97278	1	1.80851	1	-3.83037		1	-21.6724	1	-21.7733	1	-2.07313	0.127461	-11.4978		0.12352	-5.79264	0.040978	3.46237	0.0435284	3.86132	0.0388911	3.72122		0.46554	-21.3123	0	-1.95817	0	-1.9954	0	-2.13507
0	--	0.768944	3.88104	0	--	0	--		0	--	0	--	0	--	0.195238	-11.5797		0.1647	-6.0989	0.081956	3.10867	0.0870568	3.46121	0.0777823	3.3201		0.51178	-21.3135	0.0415193	-2.29622	0.0414449	-2.34664	0.0413101	-2.50014
0	-2.62469	0.813793	4.17952	0	1.87142	0	-3.63963		0	-21.6718	0	-21.7723	0	-2.0679	0.263015	-11.4911		0.20544	-6.10807	0.122934	2.92996	0.130585	3.71879	0.116673	3.31098		0.55802	-21.3145	0.0830387	-2.50799	0.0828899	-2.54397	0.0826203	-2.70675
0.04312	-2.59613	0.858641	4.51594	0.0709098	1.8945	0.0546755	-3.56739		0.04423	-21.672	0.0444501	-21.7724	0.0445789	-2.23296	0.330792	-11.7626		0.24617	-6.13871	0.163912	2.7941	0.174114	3.3772	0.155565	2.80756		0.60935	-21.3134	0.124558	-2.59019	0.124335	-2.66778	0.12393	-2.84233
0.08624	-2.72731	0.905761	4.06793	0.14182	2.06135	0.109351	-3.0242		0.08846	-21.6725	0.0889002	-21.7726	0.0891577	-2.19316	0.410782	-11.5507		0.28691	-6.19857	0.204886	2.78204	0.211924	3.76053	0.198981	3.12481		0.66068	-21.3121	0.166077	-2.63181	0.16578	-2.71002	0.165241	-2.90959
0.12936	-2.82704	0.95288	4.05052	0.236109	1.88587	0.164027	-2.52046		0.13269	-21.6726	0.13335	-21.7723	0.133737	-2.17831	0.490773	-11.717		0.32765	-6.29437	0.245861	3.1256	0.249735	3.6338	0.242397	3.38313		0.71201	-21.3117	0.20639	-2.51103	0.20619	-2.5682	0.205814	-2.71659
0.17972	-2.55918	1	3.8617	0.330399	2.09915	0.218702	-2.59801		0.18222	-21.6727	0.182718	-21.7725	0.183007	-2.28028	0.570763	-11.5587		0.37398	-6.08049	0.286835	3.22339	0.287546	3.22642	0.285813	3.0421		0.75185	-21.3111	0.246703	-2.38823	0.2466	-2.43131	0.246388	-2.57313
0.23009	-2.30032	0	--	0.409169	2.08206	0.273378	-2.58537		0.23176	-21.6726	0.232086	-21.7724	0.232277	-2.29694	0.650673	-11.7172		0.42032	-5.82876	0.32781	2.73634	0.325357	2.81103	0.329229	2.72858		0.7917	-21.3106	0.287015	-2.37689	0.28701	-2.46946	0.286962	-2.70233
0.28045	-2.55014	0	4.24345	0.487938	2.07949	0.328053	-1.90186		0.28129	-21.6725	0.281454	-21.7725	0.281547	-2.31822	0.730584	-11.5515		0.46666	-5.58153	0.366441	3.2845	0.363794	3.13451	0.368085	3.2		0.83155	-21.3109	0.327328	-1.92959	0.32742	-2.00711	0.327536	-2.17702
0.33082	-2.64081	0.0471196	4.05287	0.566708	1.87142	0.385369	-2.03528		0.33083	-21.6723	0.330822	-21.7728	0.330817	-2.3134	0.801561	-11.6038		0.51299	-5.39594	0.405072	2.80026	0.402231	3.42359	0.406941	3.28927		0.87366	-21.311	0.373636	-2.19256	0.373728	-2.22599	0.373857	-2.37684
0.3787	-2.68713	0.0942392	4.22802	0.645398	2.07949	0.442684	-1.87563		0.37852	-21.6724	0.378478	-21.7728	0.378452	-2.36673	0.872539	-11.4978		0.55933	-5.32654	0.443704	2.9735	0.440668	3.59814	0.445797	3.39077		0.91577	-21.3118	0.419944	-2.39093	0.420035	-2.45555	0.420179	-2.64133
0.42658	-2.41083	0.141359	4.51601	0.724089	2.08109	0.5	-2.04675		0.42621	-21.6722	0.426134	-21.7728	0.426087	-2.19493	0.936269	-11.569		0.61076	-5.41148	0.482335	3.13142	0.479105	3.98782	0.484653	3.79908		0.95789	-21.3133	0.466253	-2.34114	0.466343	-2.38096	0.4665	-2.55018
0.47447	-2.48256	0.188659	4.34411	0.791135	1.81874	0.554676	-2.04		0.47391	-21.6721	0.47379	-21.7729	0.473722	-2.13523	1	-11.5587		0.6622	-5.63278	0.520967	3.29713	0.517542	3.83866	0.523509	3.6611		1	-21.3145	0.512561	-2.35315	0.51265	-2.42832	0.512822	-2.63111
0.52235	-2.626	0.235958	4.09151	0.85818	2.06135	0.609351	-2.55693		0.5216	-21.672	0.521446	-21.7726	0.521357	-2.09284	0	--		0.71363	-5.91375	0.559598	3.77388	0.555979	3.78644	0.562365	3.6943		0	--	0.55887	-1.95817	0.558958	-1.9954	0.559143	-2.13507
0.57023	-2.62469	0.283258	3.68737	0.92909	1.8945	0.664027	-2.7513		0.56929	-21.6718	0.569102	-21.7723	0.568992	-2.0679	0	-11.5462		0.75419	-5.8962	0.598191	3.29798	0.594377	3.83864	0.601182	3.66159		0	-21.3119	0.597421	-2.33703	0.597509	-2.36081	0.597706	-2.52802
0.62338	-2.60397	0.330558	3.44074	1	1.87142	0.718702	-3.2131		0.62223	-21.6721	0.622	-21.7727	0.621866	-2.10789	0.0637306	-11.5151		0.79475	-5.97032	0.636783	3.13079	0.632776	3.98783	0.64	3.79893		0.04211	-21.312	0.635973	-2.29446	0.63606	-2.35469	0.636269	-2.54175
0.67654	-2.46985	0.389612	4.12733	0	--	0.773378	-3.94368		0.67517	-21.6721	0.674899	-21.7727	0.674741	-2.17972	0.127461	-11.4973		0.8353	-6.0989	0.675376	2.97473	0.671174	3.60101	0.678817	3.39388		0.08423	-21.3117	0.674525	-2.31078	0.674611	-2.35684	0.674831	-2.51275
0.72969	-2.51277	0.448667	4.08856	0	2.08721	0.828053	-4.52828		0.72811	-21.6723	0.727797	-21.7727	0.727616	-2.31022	0.195238	-11.5794		0.87648	-5.79264	0.713969	2.79765	0.709573	3.42285	0.717634	3.28725		0.12634	-21.3101	0.713076	-2.3981	0.713162	-2.45767	0.713394	-2.66051
0.77667	-2.48418	0.507721	4.0485	0.0709098	2.07893	0.885369	-3.64271		0.77451	-21.6725	0.774081	-21.7726	0.773832	-2.32109	0.263015	-11.4909		0.91765	-5.54243	0.754675	2.96717	0.748344	3.51235	0.759901	3.16755		0.16845	-21.3101	0.753358	-2.34034	0.753515	-2.40724	0.753849	-2.5844
0.82366	-2.61155	0.566775	4.24345	0.14182	2.06135	0.942684	-3.5726		0.82091	-21.6727	0.820365	-21.7726	0.820048	-2.26784	0.330792	-11.7618		0.95883	-5.38142	0.795382	2.8149	0.787115	3.87267	0.802168	3.18405		0.22124	-21.3102	0.793641	-2.48519	0.793867	-2.54633	0.794304	-2.72188
0.87064	-2.82704	0.619216	4.05627	0.236109	1.90857	1	-3.63963		0.86731	-21.6726	0.86665	-21.7723	0.866263	-2.17831	0.410782	-11.5346		1	-5.32654	0.836088	2.7941	0.825886	3.3772	0.844435	2.80756		0.27403	-21.3104	0.833923	-2.63181	0.83422	-2.71002	0.834759	-2.90959
0.91376	-2.72731	0.671656	4.09406	0.330399	2.09915	0	--		0.91154	-21.6725	0.9111	-21.7726	0.910842	-2.19316	0.490773	-11.5348		0	--	0.877066	2.92996	0.869415	3.71879	0.883327	3.31098		0.32682	-21.3106	0.875442	-2.59019	0.875665	-2.66778	0.87607	-2.84233
0.95688	-2.59613	0.724096	3.99763	0.409169	2.08877	0	-3.63798		0.95577	-21.672	0.95555	-21.7724	0.955421	-2.23296	0.570763	-11.5462		0	-4.4259	0.918044	3.10867	0.912943	3.46121	0.922218	3.3201		0.37306	-21.31	0.916961	-2.50799	0.91711	-2.54397	0.91738	-2.70675
1	-2.62469	0.768944	4.16161	0.487938	2.07976	0.0546755	-3.56613		1	-21.6718	1	-21.7723	1	-2.0679	0.650673	-11.5348		0.04117	-4.35166	0.959022	3.46237	0.956472	3.86132	0.961109	3.72122		0.4193	-21.311	0.958481	-2.29622	0.958555	-2.34664	0.95869	-2.50014
0	--	0.813793	4.30552	0.566708	2.08721	0.109351	-3.02388		0	--	0	--	0	--	0.730584	-11.5349		0.08235	-4.13879	1	3.77388	1	3.78644	1	3.6943		0.46554	-21.3121	1	-1.95817	1	-1.9954	1	-2.13507
0	-2.4913	0.858641	4.51601	0.645398	2.07975	0.164027	-2.51808		0	-21.6717	0	-21.7723	0	-2.06756	0.801561	-11.5628		0.12352	-3.80739	0	--	0	--	0	--		0.51178	-21.3121	0	--	0	--	0	--
0.04312	-2.47871	0.905761	4.22802	0.724089	2.08876	0.218702	-2.5966		0.04423	-21.6719	0.0444501	-21.7723	0.0445789	-2.11342	0.872539	-11.4973		0.1647	-3.37803	0	3.78464	0	4.62442	0	4.11151		0.55802	-21.3119	0	-1.953	0	-1.99508	0	-2.13276
0.08624	-2.52111	0.95288	4.05287	0.791135	2.0736	0.273378	-1.97908		0.08846	-21.6722	0.0889002	-21.7726	0.0891577	-2.19286	0.936269	-11.5151		0.20544	-3.64267	0.040978	3.51611	0.0435284	4.3244	0.0388911	3.85955		0.60935	-21.3121	0.0415193	-2.28056	0.0414449	-2.33573	0.0413101	-2.49624
0.12936	-2.82703	1	4.24345	0.85818	2.06135	0.328053	-1.90179		0.13269	-21.6726	0.13335	-21.7723	0.133737	-2.17828	1	-11.5462		0.24617	-3.81688	0.081956	3.11133	0.0870568	4.32249	0.0777823	3.64178		0.66068	-21.312	0.0830387	-2.49527	0.0828899	-2.53572	0.0826203	-2.69248
0.17972	-2.55917	0	--	0.92909	2.07893	0.385369	-1.89239		0.18222	-21.6727	0.182718	-21.7725	0.183007	-2.28026	0	--		0.28691	-3.87373	0.122934	3.1055	0.130585	4.1893	0.116673	3.34842		0.71201	-21.3105	0.124558	-2.50766	0.124335	-2.56453	0.12393	-2.7059
0.23009	-2.30031	0	4.34378	1	2.08721	0.442684	-1.38949		0.23176	-21.6726	0.232086	-21.7724	0.232277	-2.29692	0	-11.5397		0.32765	-3.7948	0.163912	3.03508	0.174114	4.21605	0.155565	2.87276		0.75185	-21.31	0.166077	-2.62985	0.16578	-2.70585	0.165241	-2.86028
0.28045	-2.55013	0.0471196	4.37073	0	--	0.5	-0.992612		0.28129	-21.6725	0.281454	-21.7725	0.281547	-2.31819	0.0637306	-11.5085		0.37398	-4.02174	0.204886	3.21376	0.211924	3.7763	0.198981	3.15574		0.7917	-21.3104	0.20639	-2.40168	0.20619	-2.48027	0.205814	-2.68343
0.33082	-2.6408	0.0942392	4.28782	0	2.09066	0.554676	-1.75046		0.33083	-21.6723	0.330822	-21.7728	0.330817	-2.31338	0.127461	-11.4274		0.42032	-4.2056	0.245861	3.18567	0.249735	3.78167	0.242397	3.7053		0.83155	-21.3101	0.246703	-2.18087	0.2466	-2.21042	0.246388	-2.36593
0.3787	-2.64964	0.141359	4.5737	0.0709098	2.08073	0.609351	-2.41997		0.37852	-21.6723	0.378478	-21.7727	0.378452	-2.3652	0.195238	-11.4575		0.46666	-4.33535	0.286835	3.95242	0.287546	4.34382	0.285813	4.29047		0.87366	-21.3101	0.287015	-2.07408	0.28701	-2.06376	0.286962	-2.16579
0.42658	-2.39582	0.188659	4.43289	0.14182	2.07012	0.664027	-2.51217		0.42621	-21.6721	0.426134	-21.7726	0.426087	-2.18651	0.263015	-11.4727		0.51299	-4.40601	0.32781	4.38663	0.325357	5.06747	0.329229	4.68045		0.91577	-21.3117	0.327328	-1.91002	0.32742	-1.9696	0.327536	-2.17236
0.47447	-2.42606	0.235958	4.10189	0.236109	2.08471	0.718702	-2.93936		0.47391	-21.672	0.47379	-21.7724	0.473722	-2.09336	0.330792	-11.3757		0.55933	-4.4259	0.366441	3.7857	0.363794	4.18626	0.368085	3.92833		0.95789	-21.312	0.373636	-1.99223	0.373728	-2.03168	0.373857	-2.2106
0.52235	-2.50188	0.283258	4.07506	0.330399	2.1044	0.773378	-3.05184		0.5216	-21.6718	0.521446	-21.772	0.521357	-2.08441	0.410782	-11.5211		0.61076	-4.40102	0.405072	3.05389	0.402231	3.57458	0.406941	3.35686		1	-21.3119	0.419944	-2.25608	0.420035	-2.30108	0.420179	-2.40874
0.57023	-2.4913	0.330558	4.11322	0.409169	2.10484	0.828053	-3.02576		0.56929	-21.6717	0.569102	-21.7723	0.568992	-2.06756	0.490773	-11.4386		0.6622	-4.31185	0.443704	3.28735	0.440668	3.84919	0.445797	3.65306		0	--	0.466253	-2.32613	0.466343	-2.3667	0.4665	-2.53975
0.62338	-2.50232	0.389612	4.1293	0.487938	2.09343	0.885369	-3.3612		0.62223	-21.6718	0.622	-21.7721	0.621866	-2.08455	0.570763	-11.5397		0.71363	-4.15046	0.482335	3.67195	0.479105	4.02571	0.484653	3.83122		0	-21.3118	0.512561	-2.32719	0.51265	-2.32289	0.512822	-2.41356
0.67654	-2.38203	0.448667	4.21276	0.566708	2.09066	0.942684	-3.57122		0.67517	-21.672	0.674899	-21.7725	0.674741	-2.10356	0.650673	-11.4382		0.75419	-4.08233	0.520967	3.76304	0.517542	4.19718	0.523509	3.80596		0.04211	-21.3113	0.55887	-1.953	0.558958	-1.99508	0.559143	-2.13276
0.72969	-2.40613	0.507721	4.39407	0.645398	2.09343	1	-3.63798		0.72811	-21.6721	0.727797	-21.7725	0.727616	-2.22869	0.730584	-11.5205		0.79475	-3.80386	0.559598	3.78464	0.555979	4.62442	0.562365	4.11151		0.08423	-21.3104	0.597421	-2.29704	0.597509	-2.33238	0.597706	-2.42322
0.77667	-2.37913	0.566775	4.34378	0.724089	2.10497	0	--		0.77451	-21.6724	0.774081	-21.7726	0.773832	-2.25721	0.801561	-11.5614		0.8353	-3.37803	0.598191	3.76307	0.594377	4.19799	0.601182	3.80621		0.12634	-21.3099	0.635973	-2.27196	0.63606	-2.27094	0.636269	-2.39944
0.82366	-2.56425	0.619216	4.39329	0.791135	2.0805	0	-3.1805		0.82091	-21.6726	0.820365	-21.7725	0.820048	-2.26376	0.872539	-11.4274		0.87648	-3.80739	0.636783	3.67267	0.632776	4.02521	0.64	3.83064		0.16845	-21.3101	0.674525	-2.28467	0.674611	-2.34201	0.674831	-2.4982
0.87064	-2.82703	0.671656	4.33776	0.85818	2.07012	0.0546755	-3.14493		0.86731	-21.6726	0.86665	-21.7723	0.866263	-2.17828	0.936269	-11.5085		0.91765	-4.13879	0.675376	3.28852	0.671174	3.84996	0.678817	3.65434		0.22124	-21.3102	0.713076	-2.38523	0.713162	-2.43692	0.713394	-2.54603
0.91376	-2.52111	0.724096	4.24415	0.92909	2.08073	0.109351	-2.95388		0.91154	-21.6722	0.9111	-21.7726	0.910842	-2.19286	1	-11.5397		0.95883	-4.35166	0.713969	3.05235	0.709573	3.57639	0.717634	3.35843		0.27403	-21.3104	0.753358	-2.22196	0.753515	-2.27907	0.753849	-2.49437
0.95688	-2.47871	0.768944	4.24704	1	2.09066	0.164027	-2.25433		0.95577	-21.6719	0.95555	-21.7723	0.955421	-2.11342	0	--		1	-4.4259	0.754675	2.99625	0.748344	3.94418	0.759901	3.35914		0.32682	-21.3106	0.793641	-2.43396	0.793867	-2.48523	0.794304	-2.62131
1	-2.4913	0.813793	4.43328	0	--	0.218702	-1.50502		1	-21.6717	1	-21.7723	1	-2.06756	0	-11.1626		0	--	0.795382	2.97023	0.787115	3.92079	0.802168	3.29193		0.37306	-21.3098	0.833923	-2.62985	0.83422	-2.70585	0.834759	-2.86028
0	--	0.858641	4.5737	0	2.09887	0.273378	-1.3491		0	--	0	--	0	--	0.0637306	-11.2991		0	-4.42586	0.836088	3.03508	0.825886	4.21605	0.844435	2.87276		0.4193	-21.3103	0.875442	-2.50766	0.875665	-2.56453	0.87607	-2.7059
0	-2.49128	0.905761	4.28782	0.0709098	2.08215	0.328053	-1.64253		0	-21.6715	0	-21.7716	0	-1.8667	0.127461	-11.4265		0.04117	-4.35154	0.877066	3.1055	0.869415	4.1893	0.883327	3.34842		0.46554	-21.3109	0.916961	-2.49527	0.91711	-2.53572	0.91738	-2.69248
0.04312	-2.47865	0.95288	4.37073	0.14182	2.07012	0.385369	-1.68796		0.04423	-21.6716	0.0444501	-21.7723	0.0445789	-2.0127	0.195238	-11.457		0.08235	-4.13857	0.918044	3.11133	0.912943	4.32249	0.922218	3.64178		0.51178	-21.3115	0.958481	-2.28056	0.958555	-2.33573	0.95869	-2.49624
0.08624	-2.19314	1	4.34378	0.236109	2.08594	0.442684	-1.28775		0.08846	-21.6721	0.0889002	-21.7726	0.0891577	-2.14511	0.263015	-11.472		0.12352	-3.80709	0.959022	3.51611	0.956472	4.3244	0.961109	3.85955		0.55802	-21.3118	1	-1.953	1	-1.99508	1	-2.13276
0.12936	-2.01067	0	--	0.330399	2.1044	0.5	-0.992231		0.13269	-21.6723	0.13335	-21.7721	0.133737	-2.17751	0.330792	-11.3756		0.1647	-3.37802	1	3.78464	1	4.62442	1	4.11151		0.60935	-21.3114	0	--	0	--	0	--
0.17972	-2.09817	0	4.49438	0.409169	2.10625	0.554676	-0.662601		0.18222	-21.6722	0.182718	-21.7722	0.183007	-2.16218	0.410782	-11.4687		0.20544	-3.64267	0	--	0	--	0	--		0.66068	-21.3108	0	-1.93996	0	-1.98571	0	-2.13015
0.23009	-2.2491	0.0471196	4.55659	0.487938	2.09637	0.609351	-1.22945		0.23176	-21.6721	0.232086	-21.772	0.232277	-2.18644	0.490773	-11.3538		0.24617	-3.81687	0	4.1138	0	4.96486	0	4.3987		0.71201	-21.3101	0.0415193	-2.27261	0.0414449	-2.33083	0.0413101	-2.48477
0.28045	-2.46217	0.0942392	4.7093	0.566708	2.09887	0.664027	-2.11659		0.28129	-21.6721	0.281454	-21.7723	0.281547	-2.3118	0.570763	-11.1626		0.28691	-3.87371	0.040978	4.00197	0.0435284	4.38832	0.0388911	4.18574		0.75185	-21.3099	0.0830387	-2.25486	0.0828899	-2.30598	0.0826203	-2.43685
0.33082	-2.64079	0.141359	4.57394	0.645398	2.09642	0.718702	-2.93808		0.33083	-21.6722	0.330822	-21.7728	0.330817	-2.31335	0.650673	-11.354		0.32765	-3.79479	0.081956	3.79481	0.0870568	4.52113	0.0777823	3.81906		0.7917	-21.3097	0.124558	-2.46488	0.124335	-2.52038	0.12393	-2.64838
0.3787	-2.44849	0.188659	4.43826	0.724089	2.10627	0.773378	-3.05142		0.37852	-21.672	0.378478	-21.7723	0.378452	-2.2567	0.730584	-11.4688		0.37398	-3.63363	0.122934	3.65169	0.130585	4.33769	0.116673	3.41345		0.83155	-21.3101	0.166077	-2.62478	0.16578	-2.7057	0.165241	-2.85754
0.42658	-2.29513	0.235958	4.10218	0.791135	2.09613	0.828053	-3.0245		0.42621	-21.6716	0.426134	-21.7724	0.426087	-2.15499	0.801561	-11.3615		0.42032	-3.28147	0.163912	3.03614	0.174114	4.21614	0.155565	2.87913		0.87366	-21.3099	0.20639	-2.40069	0.20619	-2.47987	0.205814	-2.68256
0.47447	-2.16555	0.283258	4.07688	0.85818	2.07012	0.885369	-3.36051		0.47391	-21.6714	0.47379	-21.7721	0.473722	-2.08915	0.872539	-11.4265		0.46666	-3.79439	0.204886	3.2159	0.211924	3.77706	0.198981	3.17363		0.91577	-21.3104	0.246703	-2.17011	0.2466	-2.20986	0.246388	-2.36559
0.52235	-2.36256	0.330558	4.11352	0.92909	2.08215	0.942684	-2.98524		0.5216	-21.6714	0.521446	-21.772	0.521357	-2.07128	0.936269	-11.2991		0.51299	-4.25078	0.245861	3.18866	0.249735	3.78565	0.242397	3.72242		0.95789	-21.3113	0.287015	-2.05602	0.28701	-2.06352	0.286962	-2.16428
0.57023	-2.49128	0.389612	4.15531	1	2.09887	1	-3.1805		0.56929	-21.6715	0.569102	-21.7716	0.568992	-1.8667	1	-11.1626		0.55933	-4.42586	0.286835	3.9559	0.287546	4.34435	0.285813	4.30412		1	-21.3118	0.327328	-1.8969	0.32742	-1.96886	0.327536	-2.17222
0.62338	-2.32932	0.448667	4.32897	0	--	0	--		0.62223	-21.6714	0.622	-21.772	0.621866	-2.07192	0	--		0.61076	-4.21211	0.32781	4.38663	0.325357	5.06812	0.329229	4.68101		0	--	0.373636	-1.97785	0.373728	-1.9918	0.373857	-2.14344
0.67654	-2.14885	0.507721	4.5271	0	2.09905	0	-3.17874		0.67517	-21.6714	0.674899	-21.7723	0.674741	-2.00657	0	-11.1599		0.6622	-3.66939	0.366441	3.9775	0.363794	4.73874	0.368085	4.40691		0	-21.3105	0.419944	-2.22929	0.420035	-2.26028	0.420179	-2.3987
0.72969	-2.35026	0.566775	4.49438	0.0709098	2.08904	0.0546755	-3.14332		0.72811	-21.6718	0.727797	-21.7724	0.727616	-2.21089	0.0637306	-11.2924		0.71363	-3.36571	0.405072	3.125	0.402231	3.97223	0.406941	3.60122		0.04211	-21.3103	0.466253	-2.29388	0.466343	-2.35053	0.4665	-2.53108
0.77667	-2.33909	0.619216	4.52202	0.14182	2.12185	0.109351	-2.95205		0.77451	-21.6722	0.774081	-21.7724	0.773832	-2.21779	0.127461	-11.4207		0.75419	-3.40056	0.443704	3.41772	0.440668	3.89895	0.445797	3.72437		0.08423	-21.3098	0.512561	-2.00328	0.51265	-2.0507	0.512822	-2.19231
0.82366	-2.15331	0.671656	4.35296	0.236109	2.09865	0.164027	-2.14215		0.82091	-21.6724	0.820365	-21.7723	0.820048	-2.24528	0.195238	-11.2866		0.79475	-3.41122	0.482335	3.75633	0.479105	4.51858	0.484653	4.19279		0.12634	-21.3095	0.55887	-1.93996	0.558958	-1.98571	0.559143	-2.13015
0.87064	-2.01067	0.724096	4.24432	0.330399	2.12136	0.218702	-1.46353		0.86731	-21.6723	0.86665	-21.7721	0.866263	-2.17751	0.263015	-11.3438		0.8353	-3.37802	0.520967	3.98765	0.517542	4.78649	0.523509	4.2805		0.16845	-21.3088	0.597421	-1.97125	0.597509	-2.01961	0.597706	-2.15961
0.91376	-2.19314	0.768944	4.38525	0.409169	2.10968	0.273378	-1.03833		0.91154	-21.6721	0.9111	-21.7726	0.910842	-2.14511	0.330792	-11.3754		0.87648	-3.80709	0.559598	4.1138	0.555979	4.96486	0.562365	4.3987		0.22124	-21.3088	0.635973	-2.21632	0.63606	-2.2628	0.636269	-2.38453
0.95688	-2.47865	0.813793	4.50112	0.487938	2.10207	0.328053	-1.1261		0.95577	-21.6716	0.95555	-21.7723	0.955421	-2.0127	0.410782	-11.4145		0.91765	-4.13857	0.598191	3.98789	0.594377	4.78661	0.601182	4.28057		0.27403	-21.3087	0.674525	-2.27662	0.674611	-2.32293	0.674831	-2.47008
1	-2.49128	0.858641	4.57394	0.566708	2.09905	0.385369	-1.45128		1	-21.6715	1	-21.7716	1	-1.8667	0.490773	-11.2226		0.95883	-4.35154	0.636783	3.75631	0.632776	4.51991	0.64	4.19385		0.32682	-21.3087	0.713076	-2.15933	0.713162	-2.18148	0.713394	-2.31284
0	--	0.905761	4.7093	0.645398	2.10207	0.442684	-1.28577		0	--	0	--	0	--	0.570763	-11.1599		1	-4.42586	0.675376	3.4211	0.671174	3.90172	0.678817	3.72671		0.37306	-21.3097	0.753358	-2.20243	0.753515	-2.24898	0.753849	-2.38846
0	-2.34513	0.95288	4.55659	0.724089	2.10972	0.5	-0.463782		0	-21.6711	0	-21.7716	0	-1.86623	0.650673	-11.2223		0	--	0.713969	3.12147	0.709573	3.96917	0.717634	3.59887		0.4193	-21.3098	0.793641	-2.41815	0.793867	-2.47715	0.794304	-2.61957
0.04312	-2.23025	1	4.49438	0.791135	2.10067	0.554676	-0.659217		0.04423	-21.6713	0.0444501	-21.7722	0.0445789	-1.99092	0.730584	-11.4139		0	-3.22032	0.754675	3.16021	0.748344	4.05995	0.759901	3.59252		0.46554	-21.3101	0.833923	-2.62478	0.83422	-2.7057	0.834759	-2.85754
0.08624	-2.19308	0	--	0.85818	2.12185	0.609351	-1.22682		0.08846	-21.6719	0.0889002	-21.7726	0.0891577	-1.7487	0.801561	-11.308		0.04117	-3.1421	0.795382	3.25287	0.787115	3.94602	0.802168	3.31375		0.51178	-21.3104	0.875442	-2.46488	0.875665	-2.52038	0.87607	-2.64838
0.12936	-2.01065	0	4.87468	0.92909	2.08904	0.664027	-2.11626		0.13269	-21.6723	0.13335	-21.7721	0.133737	-2.1775	0.872539	-11.4207		0.08235	-3.1557	0.836088	3.03614	0.825886	4.21614	0.844435	2.87913		0.55802	-21.3105	0.916961	-2.25486	0.91711	-2.30598	0.91738	-2.43685
0.17972	-2.09816	0.0471196	4.83512	1	2.09905	0.718702	-2.79165		0.18222	-21.6722	0.182718	-21.7722	0.183007	-2.16217	0.936269	-11.2924		0.12352	-3.17132	0.877066	3.65169	0.869415	4.33769	0.883327	3.41345		0.60935	-21.3103	0.958481	-2.27261	0.958555	-2.33083	0.95869	-2.48477
0.23009	-2.24908	0.0942392	4.81052	0	--	0.773378	-3.01065		0.23176	-21.6721	0.232086	-21.772	0.232277	-2.18642	1	-11.1599		0.1647	-3.37768	0.918044	3.79481	0.912943	4.52113	0.922218	3.81906		0.66068	-21.31	1	-1.93996	1	-1.98571	1	-2.13015
0.28045	-2.46215	0.141359	4.67506	0	2.10459	0.828053	-3.02431		0.28129	-21.6721	0.281454	-21.7723	0.281547	-2.31172	0	--		0.20544	-3.09531	0.959022	4.00197	0.956472	4.38832	0.961109	4.18574		0.71201	-21.3098	0	--	0	--	0	--
0.33082	-2.64078	0.188659	4.66033	0.0709098	2.09762	0.885369	-2.71276		0.33083	-21.6722	0.330822	-21.7728	0.330817	-2.31332	0	-11.156		0.24617	-3.23211	1	4.1138	1	4.96486	1	4.3987		0.75185	-21.3096	0	-1.93885	0	-1.98165	0	-2.12279
0.3787	-2.23163	0.235958	4.7164	0.14182	2.12186	0.942684	-2.81172		0.37852	-21.6717	0.378478	-21.7719	0.378452	-2.2512	0.0637306	-11.2464		0.28691	-3.57604	0	--	0	--	0	--		0.7917	-21.3092	0.0415193	-1.87791	0.0414449	-1.89151	0.0413101	-2.0098
0.42658	-2.23062	0.283258	4.3904	0.236109	2.10247	1	-3.17874		0.42621	-21.6714	0.426134	-21.7721	0.426087	-2.08922	0.127461	-11.42		0.32765	-3.79478	0	4.13089	0	5.18397	0	5.10781		0.83155	-21.3088	0.0830387	-2.25124	0.0828899	-2.30321	0.0826203	-2.43293
0.47447	-2.09004	0.330558	4.11819	0.330399	2.12136	0	--		0.47391	-21.6713	0.47379	-21.7721	0.473722	-1.979	0.195238	-11.2864		0.37398	-3.62521	0.040978	4.1316	0.0435284	5.19551	0.0388911	4.87915		0.87366	-21.3095	0.124558	-2.25599	0.124335	-2.30939	0.12393	-2.56091
0.52235	-2.28653	0.389612	4.15863	0.409169	2.11107	0	-3.01507		0.5216	-21.671	0.521446	-21.7718	0.521357	-1.99329	0.263015	-11.3434		0.42032	-3.20529	0.081956	4.12819	0.0870568	4.72573	0.0777823	4.25732		0.91577	-21.3098	0.166077	-2.46073	0.16578	-2.51357	0.165241	-2.67154
0.57023	-2.34513	0.448667	4.5994	0.487938	2.1146	0.0546755	-3.01353		0.56929	-21.6711	0.569102	-21.7716	0.568992	-1.86623	0.330792	-11.3753		0.46666	-3.14288	0.122934	3.86794	0.130585	4.37882	0.116673	3.42066		0.95789	-21.3103	0.20639	-2.28899	0.20619	-2.33069	0.205814	-2.46085
0.62338	-2.27503	0.507721	4.7013	0.566708	2.10459	0.109351	-2.83429		0.62223	-21.671	0.622	-21.7718	0.621866	-2.02812	0.410782	-11.2994		0.51299	-3.19199	0.163912	3.43207	0.174114	4.34382	0.155565	3.908		1	-21.3105	0.246703	-2.06105	0.2466	-2.13099	0.246388	-2.33064
0.67654	-2.13598	0.566775	4.87468	0.645398	2.1146	0.164027	-2.14107		0.67517	-21.6713	0.674899	-21.7722	0.674741	-1.98734	0.490773	-11.1982		0.55933	-3.22032	0.204886	3.36997	0.211924	4.6329	0.198981	3.34895		0	--	0.287015	-1.76334	0.28701	-1.73995	0.286962	-1.89497
0.72969	-2.27109	0.619216	4.73748	0.724089	2.11107	0.218702	-1.14997		0.72811	-21.6715	0.727797	-21.772	0.727616	-2.1834	0.570763	-11.156		0.61076	-3.18543	0.245861	3.68292	0.249735	4.79694	0.242397	3.72445		0	-21.3102	0.327328	-1.83978	0.32742	-1.81387	0.327536	-1.88311
0.77667	-2.2057	0.671656	4.58087	0.791135	2.10446	0.273378	-0.601166		0.77451	-21.6717	0.774081	-21.7722	0.773832	-2.13106	0.650673	-11.1981		0.6622	-3.1429	0.286835	4.07196	0.287546	4.99912	0.285813	4.36819		0.04211	-21.3101	0.373636	-1.94472	0.373728	-1.94138	0.373857	-2.10173
0.82366	-2.12615	0.724096	4.31549	0.85818	2.12186	0.328053	-0.76564		0.82091	-21.672	0.820365	-21.7722	0.820048	-2.04189	0.730584	-11.2994		0.71363	-3.36331	0.32781	4.39013	0.325357	5.07223	0.329229	4.68997		0.08423	-21.3097	0.419944	-2.19371	0.420035	-2.22233	0.420179	-2.37356
0.87064	-2.01065	0.768944	4.6449	0.92909	2.09762	0.385369	-1.02884		0.86731	-21.6723	0.86665	-21.7721	0.866263	-2.1775	0.801561	-11.2636		0.75419	-3.18759	0.366441	3.97776	0.363794	4.84128	0.368085	4.47547		0.12634	-21.3094	0.466253	-2.26609	0.466343	-2.29972	0.4665	-2.44378
0.91376	-2.19308	0.813793	4.74814	1	2.10459	0.442684	-0.77146		0.91154	-21.6719	0.9111	-21.7726	0.910842	-1.7487	0.872539	-11.42		0.79475	-3.30042	0.405072	3.12523	0.402231	4.39031	0.406941	3.98916		0.16845	-21.3088	0.512561	-1.9977	0.51265	-2.03368	0.512822	-2.17156
0.95688	-2.23025	0.858641	4.67506	0	--	0.5	-0.462461		0.95577	-21.6713	0.95555	-21.7722	0.955421	-1.99092	0.936269	-11.2464		0.8353	-3.37768	0.443704	3.57483	0.440668	3.98532	0.445797	3.78048		0.22124	-21.3087	0.55887	-1.93885	0.558958	-1.98165	0.559143	-2.12279
1	-2.34513	0.905761	4.81052	0	2.11577	0.554676	-0.490065		1	-21.6711	1	-21.7716	1	-1.86623	1	-11.156		0.87648	-3.17132	0.482335	4.10663	0.479105	4.65889	0.484653	4.25434		0.27403	-21.3087	0.597421	-1.96576	0.597509	-1.9998	0.597706	-2.13787
0	--	0.95288	4.83512	0.0709098	2.09827	0.609351	-1.13227		0	--	0	--	0	--	0	--		0.91765	-3.1557	0.520967	4.142	0.517542	5.22651	0.523509	4.77471		0.32682	-21.3087	0.635973	-2.20471	0.63606	-2.23851	0.636269	-2.35744
0	-2.34511	1	4.87468	0.14182	2.1282	0.664027	-2.09418		0	-21.6708	0	-21.7716	0	-1.70886	0	-11.1535		0.95883	-3.1421	0.559598	4.13089	0.555979	5.18397	0.562365	5.10781		0.37306	-21.3095	0.674525	-2.27136	0.674611	-2.31314	0.674831	-2.46564
0.04312	-2.23021	0	--	0.236109	2.1079	0.718702	-2.79062		0.04423	-21.671	0.0444501	-21.7713	0.0445789	-1.89276	0.0637306	-11.0488		1	-3.22032	0.598191	4.14199	0.594377	5.22721	0.601182	4.77528		0.4193	-21.3097	0.713076	-2.11308	0.713162	-2.13345	0.713394	-2.27837
0.08624	-2.07944	0	5.3494	0.330399	2.13296	0.773378	-3.00993		0.08846	-21.6705	0.0889002	-21.7717	0.0891577	-1.71989	0.127461	-10.983		0	--	0.636783	4.10695	0.632776	4.65955	0.64	4.25438		0.46554	-21.31	0.753358	-2.18916	0.753515	-2.22202	0.753849	-2.38168
0.12936	-2.01063	0.0471196	5.411	0.409169	2.13733	0.828053	-3.02369		0.13269	-21.6698	0.13335	-21.7721	0.133737	-2.15555	0.195238	-11.1848		0	-3.22031	0.675376	3.5775	0.671174	3.98616	0.678817	3.78164		0.51178	-21.3102	0.793641	-2.27308	0.793867	-2.36681	0.794304	-2.6019
0.17972	-2.06112	0.0942392	5.29378	0.487938	2.13284	0.885369	-2.6993		0.18222	-21.6697	0.182718	-21.772	0.183007	-1.88788	0.263015	-11.2852		0.04117	-3.14208	0.713969	3.12171	0.709573	4.39153	0.717634	3.98538		0.55802	-21.3102	0.833923	-2.46073	0.83422	-2.51357	0.834759	-2.67154
0.23009	-2.14471	0.141359	4.6752	0.566708	2.11577	0.942684	-2.81078		0.23176	-21.6693	0.232086	-21.7719	0.232277	-2.10245	0.330792	-11.1814		0.08235	-2.9264	0.754675	3.30873	0.748344	4.27869	0.759901	3.6528		0.60935	-21.3102	0.875442	-2.25599	0.875665	-2.30939	0.87607	-2.56091
0.28045	-2.17191	0.188659	4.678	0.645398	2.13284	1	-3.01507		0.28129	-21.6687	0.281454	-21.7715	0.281547	-2.23024	0.410782	-11.2771		0.12352	-2.98905	0.795382	3.3631	0.787115	4.52638	0.802168	3.37582		0.66068	-21.31	0.916961	-2.25124	0.91711	-2.30321	0.91738	-2.43293
0.33082	-2.00051	0.235958	4.74538	0.724089	2.13719	0	--		0.33083	-21.6679	0.330822	-21.771	0.330817	-2.221	0.490773	-11.1607		0.1647	-3.37767	0.836088	3.43207	0.825886	4.34382	0.844435	3.908		0.71201	-21.3097	0.958481	-1.87791	0.958555	-1.89151	0.95869	-2.0098
0.3787	-2.20955	0.283258	4.39325	0.791135	2.11138	0	-1.39564		0.37852	-21.6688	0.378478	-21.7718	0.378452	-2.20236	0.570763	-11.1535		0.20544	-3.0953	0.877066	3.86794	0.869415	4.37882	0.883327	3.42066		0.75185	-21.3095	1	-1.93885	1	-1.98165	1	-2.12279
0.42658	-2.15791	0.330558	4.11862	0.85818	2.1282	0.0546755	-1.52186		0.42621	-21.6697	0.426134	-21.772	0.426087	-2.08341	0.650673	-11.1606		0.24617	-3.23208	0.918044	4.12819	0.912943	4.72573	0.922218	4.25732		0.7917	-21.309	0	--	0	--	0	--
0.47447	-2.07341	0.389612	4.2021	0.92909	2.09827	0.109351	-1.62849		0.47391	-21.6704	0.47379	-21.7719	0.473722	-1.97286	0.730584	-11.2769		0.28691	-3.57601	0.959022	4.1316	0.956472	5.19551	0.961109	4.87915		0.83155	-21.3088	0	-1.74834	0	-1.75982	0	-1.99041
0.52235	-2.1126	0.448667	4.64207	1	2.11577	0.164027	-1.5963		0.5216	-21.671	0.521446	-21.7716	0.521357	-1.90938	0.801561	-11.1952		0.32765	-3.79476	1	4.13089	1	5.18397	1	5.10781		0.87366	-21.3094	0.0415193	-1.79854	0.0414449	-1.87133	0.0413101	-1.97988
0.57023	-2.34511	0.507721	5.34023	0	--	0.218702	-1.1484		0.56929	-21.6708	0.569102	-21.7716	0.568992	-1.70886	0.872539	-10.983		0.37398	-3.54048	0	--	0	--	0	--		0.91577	-21.3097	0.0830387	-2.18502	0.0828899	-2.23923	0.0826203	-2.36399
0.62338	-2.08111	0.566775	5.3494	0	2.13278	0.273378	-0.579618		0.62223	-21.6709	0.622	-21.7717	0.621866	-1.93674	0.936269	-11.0488		0.42032	-3.19348	0	4.67893	0	5.29438	0	5.12113		0.95789	-21.3101	0.124558	-2.20828	0.124335	-2.3082	0.12393	-2.54721
[truncated: 9,170 more rows]

## Sheet: DOS
		Density of state (DOS)
		For α-SnTe Monolayer													For α-SnTe Bilayer																	For γ-SnTe Monolayer
Enargy, E	TDOS												Enargy, E	TDOS																Enargy, E	TDOS
eV	states/eV												eV	states/eV																eV	states/eV
[truncated: 3,707 more rows]
[truncated: 55 more columns]

## Sheet: Phonon
						Phonon Properties and Molecular Dynamics
[truncated: 2,500 more rows]

[truncated: 2 more sheets: Thermodynamics, Optical]
